# Supplementary material
Source: publisher figshare collection journal article supplement (https://diabetesjournals.figshare.com/ndownloader/files/34172193)
Supplement: Supplementary file 1 [file 34172193]

## Sheet: Table 9
Table S9. Significant associations of the eQTL rs1056441 (cis-pQTL for TNFRSF6B), rs114887538 (cis-pQTL for ATF6B), rs2510885 (cis-pQTL for CDK2AP1), rs28529403 (cis-pQTL for MAPK3), rs2781668 (cis-pQTL for ARG1), rs45543339 (cis-pQTL for GDF15), rs2280774 (cis-pQTL for CAA/B), and rs308403 (cis-pQTL for FGF2) with other traits using PhenoScanner.
SNP	RSID	ref_hg19_coordinates	ref_hg38_coordinates	Alleles	trait	efo	study	pmid	ancestry	year	beta	se	p	direction	n	n_studies	unit	dataset
rs1056441	rs1056441	chr20:62370349	chr20:63738996	C/T	Inflammatory bowel disease	EFO_0003767	IBDGC	23128233	European	2012	NA	NA	1e-23	NA	-	-	-	NHGRI-EBI_GWAS_Catalog
rs1056441	rs1056441	chr20:62370349	chr20:63738996	C/T	Inflammatory bowel disease	EFO_0003767	IBDGC	23128233	European	2012	NA	NA	1.09e-23	NA	34366	-	-	GRASP
rs1056441	rs1056441	chr20:62370349	chr20:63738996	C/T	Inflammatory bowel disease	EFO_0003767	IBDGC	26192919	European	2015	0.1582	0.0188	3.41e-17	+	34652	15	log OR	IBDGC_IBD_EUR_2015
rs1056441	rs1056441	chr20:62370349	chr20:63738996	C/T	Crohns disease	EFO_0000384	IBDGC	26192919	European	2015	-0.1105	0.01326	8e-17	-	-	-	log OR	NHGRI-EBI_GWAS_Catalog
rs1056441	rs1056441	chr20:62370349	chr20:63738996	C/T	Prostate cancer	EFO_0001663	Eeles RA	23535732	European	2013	NA	NA	3.57e-16	NA	22548	-	-	GRASP
rs1056441	rs1056441	chr20:62370349	chr20:63738996	C/T	Prostate cancer	EFO_0001663	Eeles RA	23535732	European	2013	0.1133	0.01392	4e-16	+	-	-	log OR	NHGRI-EBI_GWAS_Catalog
rs1056441	rs1056441	chr20:62370349	chr20:63738996	C/T	Forced vital capacity	EFO_0004312	Neale B	UKBB	European	2017	-0.01697	0.002087	4.29e-16	-	307638	1	IVNT	Neale-B_UKBB_EUR_2017
rs1056441	rs1056441	chr20:62370349	chr20:63738996	C/T	Forced vital capacity	EFO_0004312	Neale B	UKBB	European	2017	-0.01693	0.002087	4.84e-16	-	307638	1	IVNT	Neale-B_UKBB_EUR_2017
rs1056441	rs1056441	chr20:62370349	chr20:63738996	C/T	Forced vital capacity	EFO_0004312	Neale B	UKBB	European	2017	-0.01693	0.002087	4.88e-16	-	307638	1	IVNT	Neale-B_UKBB_EUR_2017
rs1056441	rs1056441	chr20:62370349	chr20:63738996	C/T	Forced vital capacity	EFO_0004312	Neale B	UKBB	European	2017	-0.01691	0.002086	5.26e-16	-	307638	1	IVNT	Neale-B_UKBB_EUR_2017
rs1056441	rs1056441	chr20:62370349	chr20:63738996	C/T	Forced vital capacity	EFO_0004312	Neale B	UKBB	European	2017	-0.01691	0.002087	5.38e-16	-	307638	1	IVNT	Neale-B_UKBB_EUR_2017
rs1056441	rs1056441	chr20:62370349	chr20:63738996	C/T	Forced vital capacity	EFO_0004312	Neale B	UKBB	European	2017	-0.01689	0.00209	6.42e-16	-	307638	1	IVNT	Neale-B_UKBB_EUR_2017
rs1056441	rs1056441	chr20:62370349	chr20:63738996	C/T	Forced vital capacity	EFO_0004312	Neale B	UKBB	European	2017	-0.0169	0.002098	7.86e-16	-	307638	1	IVNT	Neale-B_UKBB_EUR_2017
rs1056441	rs1056441	chr20:62370349	chr20:63738996	C/T	Forced vital capacity	EFO_0004312	Neale B	UKBB	European	2017	-0.01689	0.002098	8.34e-16	-	307638	1	IVNT	Neale-B_UKBB_EUR_2017
rs1056441	rs1056441	chr20:62370349	chr20:63738996	C/T	Forced vital capacity	EFO_0004312	Neale B	UKBB	European	2017	-0.01688	0.002098	8.47e-16	-	307638	1	IVNT	Neale-B_UKBB_EUR_2017
rs1056441	rs1056441	chr20:62370349	chr20:63738996	C/T	Forced vital capacity	EFO_0004312	Neale B	UKBB	European	2017	-0.01689	0.002099	8.48e-16	-	307638	1	IVNT	Neale-B_UKBB_EUR_2017
rs1056441	rs1056441	chr20:62370349	chr20:63738996	C/T	Inflammatory bowel disease	EFO_0003767	IBDGC	26192919	European	2015	0.1487	0.0185	8.49e-16	+	34652	15	log OR	IBDGC_IBD_EUR_2015
rs1056441	rs1056441	chr20:62370349	chr20:63738996	C/T	Forced vital capacity	EFO_0004312	Neale B	UKBB	European	2017	-0.01688	0.002098	8.59e-16	-	307638	1	IVNT	Neale-B_UKBB_EUR_2017
rs1056441	rs1056441	chr20:62370349	chr20:63738996	C/T	Forced vital capacity	EFO_0004312	Neale B	UKBB	European	2017	-0.01687	0.002098	8.77e-16	-	307638	1	IVNT	Neale-B_UKBB_EUR_2017
rs1056441	rs1056441	chr20:62370349	chr20:63738996	C/T	Forced vital capacity	EFO_0004312	Neale B	UKBB	European	2017	-0.01686	0.002098	9.44e-16	-	307638	1	IVNT	Neale-B_UKBB_EUR_2017
rs1056441	rs1056441	chr20:62370349	chr20:63738996	C/T	Forced vital capacity	EFO_0004312	Neale B	UKBB	European	2017	-0.01689	0.002102	9.5e-16	-	307638	1	IVNT	Neale-B_UKBB_EUR_2017
rs1056441	rs1056441	chr20:62370349	chr20:63738996	C/T	Forced vital capacity	EFO_0004312	Neale B	UKBB	European	2017	-0.01685	0.002098	9.65e-16	-	307638	1	IVNT	Neale-B_UKBB_EUR_2017
rs1056441	rs1056441	chr20:62370349	chr20:63738996	C/T	Forced vital capacity	EFO_0004312	Neale B	UKBB	European	2017	-0.01684	0.002098	1e-15	-	307638	1	IVNT	Neale-B_UKBB_EUR_2017
rs1056441	rs1056441	chr20:62370349	chr20:63738996	C/T	Forced vital capacity	EFO_0004312	Neale B	UKBB	European	2017	-0.01678	0.0021	1.36e-15	-	307638	1	IVNT	Neale-B_UKBB_EUR_2017
rs1056441	rs1056441	chr20:62370349	chr20:63738996	C/T	Forced vital capacity	EFO_0004312	Neale B	UKBB	European	2017	-0.01677	0.0021	1.39e-15	-	307638	1	IVNT	Neale-B_UKBB_EUR_2017
rs1056441	rs1056441	chr20:62370349	chr20:63738996	C/T	Inflammatory bowel disease	EFO_0003767	IBDGC	26192919	European	2015	0.1477	0.0185	1.4e-15	+	34652	15	log OR	IBDGC_IBD_EUR_2015
rs1056441	rs1056441	chr20:62370349	chr20:63738996	C/T	Inflammatory bowel disease	EFO_0003767	IBDGC	26192919	European	2015	0.1479	0.0185	1.44e-15	+	34652	15	log OR	IBDGC_IBD_EUR_2015
rs1056441	rs1056441	chr20:62370349	chr20:63738996	C/T	Inflammatory bowel disease	EFO_0003767	IBDGC	26192919	European	2015	0.1488	0.0187	1.56e-15	+	34652	15	log OR	IBDGC_IBD_EUR_2015
rs1056441	rs1056441	chr20:62370349	chr20:63738996	C/T	Inflammatory bowel disease	EFO_0003767	IBDGC	26192919	European	2015	0.1545	0.0194	1.67e-15	+	34652	15	log OR	IBDGC_IBD_EUR_2015
rs1056441	rs1056441	chr20:62370349	chr20:63738996	C/T	Inflammatory bowel disease	EFO_0003767	IBDGC	26192919	European	2015	0.1469	0.0185	1.86e-15	+	34652	15	log OR	IBDGC_IBD_EUR_2015
rs1056441	rs1056441	chr20:62370349	chr20:63738996	C/T	Inflammatory bowel disease	EFO_0003767	IBDGC	26192919	European	2015	0.1466	0.0185	2.09e-15	+	34652	15	log OR	IBDGC_IBD_EUR_2015
rs1056441	rs1056441	chr20:62370349	chr20:63738996	C/T	Inflammatory bowel disease	EFO_0003767	IBDGC	26192919	European	2015	0.1462	0.0185	2.41e-15	+	34652	15	log OR	IBDGC_IBD_EUR_2015
rs1056441	rs1056441	chr20:62370349	chr20:63738996	C/T	Inflammatory bowel disease	EFO_0003767	IBDGC	26192919	European	2015	0.1476	0.0187	2.56e-15	+	34652	15	log OR	IBDGC_IBD_EUR_2015
rs1056441	rs1056441	chr20:62370349	chr20:63738996	C/T	Crohns disease	NCIT_C2965	Franke A	21102463	European	2010	NA	NA	2.7e-15	NA	21389	-	-	GRASP
rs1056441	rs1056441	chr20:62370349	chr20:63738996	C/T	Inflammatory bowel disease	EFO_0003767	IBDGC	26192919	European	2015	0.1464	0.0185	2.97e-15	+	34652	15	log OR	IBDGC_IBD_EUR_2015
rs1056441	rs1056441	chr20:62370349	chr20:63738996	C/T	Inflammatory bowel disease	EFO_0003767	IBDGC	26192919	European	2015	0.1467	0.0186	3e-15	+	34652	15	log OR	IBDGC_IBD_EUR_2015
rs1056441	rs1056441	chr20:62370349	chr20:63738996	C/T	Crohns disease	EFO_0000384	Franke A	21102463	European	2010	0.1133	0.01436	3e-15	+	-	-	log OR	NHGRI-EBI_GWAS_Catalog
rs1056441	rs1056441	chr20:62370349	chr20:63738996	C/T	Inflammatory bowel disease	EFO_0003767	IBDGC	26192919	European	2015	0.1467	0.0186	3.05e-15	+	34652	15	log OR	IBDGC_IBD_EUR_2015
rs1056441	rs1056441	chr20:62370349	chr20:63738996	C/T	Inflammatory bowel disease	EFO_0003767	IBDGC	26192919	European	2015	0.1472	0.0187	3.21e-15	+	34652	15	log OR	IBDGC_IBD_EUR_2015
rs1056441	rs1056441	chr20:62370349	chr20:63738996	C/T	Inflammatory bowel disease	EFO_0003767	IBDGC	26192919	European	2015	0.1464	0.0186	3.35e-15	+	34652	15	log OR	IBDGC_IBD_EUR_2015
rs1056441	rs1056441	chr20:62370349	chr20:63738996	C/T	Inflammatory bowel disease	EFO_0003767	IBDGC	26192919	European	2015	0.1463	0.0186	3.42e-15	+	34652	15	log OR	IBDGC_IBD_EUR_2015
rs1056441	rs1056441	chr20:62370349	chr20:63738996	C/T	Inflammatory bowel disease	EFO_0003767	IBDGC	26192919	European	2015	0.1464	0.0186	3.51e-15	+	34652	15	log OR	IBDGC_IBD_EUR_2015
rs1056441	rs1056441	chr20:62370349	chr20:63738996	C/T	Inflammatory bowel disease	EFO_0003767	IBDGC	26192919	European	2015	0.1461	0.0186	4.15e-15	+	34652	15	log OR	IBDGC_IBD_EUR_2015
rs1056441	rs1056441	chr20:62370349	chr20:63738996	C/T	Forced vital capacity	EFO_0004312	Neale B	UKBB	European	2017	-0.01628	0.002085	5.86e-15	-	307638	1	IVNT	Neale-B_UKBB_EUR_2017
rs1056441	rs1056441	chr20:62370349	chr20:63738996	C/T	Inflammatory bowel disease	EFO_0003767	IBDGC	26192919	European	2015	0.1457	0.0187	6.32e-15	+	34652	15	log OR	IBDGC_IBD_EUR_2015
rs1056441	rs1056441	chr20:62370349	chr20:63738996	C/T	Forced vital capacity	EFO_0004312	Neale B	UKBB	European	2017	-0.01618	0.002085	8.68e-15	-	307638	1	IVNT	Neale-B_UKBB_EUR_2017
rs1056441	rs1056441	chr20:62370349	chr20:63738996	C/T	Pediatric Inflammatory Bowel Disease and Crohns disease	-	Kugathasan S	18758464	European	2008	NA	NA	8.85e-15	NA	5261	-	-	GRASP
rs1056441	rs1056441	chr20:62370349	chr20:63738996	C/T	Inflammatory bowel disease	EFO_0003767	Kugathasan S	18758464	European	2008	0.3075	0.03966	9e-15	+	-	-	log OR	NHGRI-EBI_GWAS_Catalog
rs1056441	rs1056441	chr20:62370349	chr20:63738996	C/T	Inflammatory bowel diseases	EFO_0003767	Kugathasan S	18758464	European	2008	NA	NA	9e-15	NA	-	-	-	dbGaP
rs1056441	rs1056441	chr20:62370349	chr20:63738996	C/T	Inflammatory bowel disease	EFO_0003767	IBDGC	26192919	European	2015	0.145	0.0187	9.03e-15	+	34652	15	log OR	IBDGC_IBD_EUR_2015
rs1056441	rs1056441	chr20:62370349	chr20:63738996	C/T	Pediatric Inflammatory Bowel Disease and Crohns disease	-	Kugathasan S	18758464	European	2008	NA	NA	1.62e-14	NA	5261	-	-	GRASP
rs1056441	rs1056441	chr20:62370349	chr20:63738996	C/T	Forced vital capacity	EFO_0004312	Neale B	UKBB	European	2017	-0.01601	0.002087	1.69e-14	-	307638	1	IVNT	Neale-B_UKBB_EUR_2017
rs1056441	rs1056441	chr20:62370349	chr20:63738996	C/T	Inflammatory bowel disease	EFO_0003767	IBDGC	26192919	European	2015	0.1418	0.0186	2.29e-14	+	34652	15	log OR	IBDGC_IBD_EUR_2015
rs1056441	rs1056441	chr20:62370349	chr20:63738996	C/T	Leg fat percentage left	-	Neale B	UKBB	European	2017	0.0115	0.001619	1.23e-12	+	331278	1	IVNT	Neale-B_UKBB_EUR_2017
rs1056441	rs1056441	chr20:62370349	chr20:63738996	C/T	Forced vital capacity, best measure	EFO_0004312	Neale B	UKBB	European	2017	-0.01631	0.002303	1.41e-12	-	255492	1	IVNT	Neale-B_UKBB_EUR_2017
rs1056441	rs1056441	chr20:62370349	chr20:63738996	C/T	Forced vital capacity, best measure	EFO_0004312	Neale B	UKBB	European	2017	-0.01631	0.002303	1.43e-12	-	255492	1	IVNT	Neale-B_UKBB_EUR_2017
rs1056441	rs1056441	chr20:62370349	chr20:63738996	C/T	Leg fat percentage left	-	Neale B	UKBB	European	2017	0.01146	0.001618	1.43e-12	+	331278	1	IVNT	Neale-B_UKBB_EUR_2017
rs1056441	rs1056441	chr20:62370349	chr20:63738996	C/T	Forced vital capacity, best measure	EFO_0004312	Neale B	UKBB	European	2017	-0.0163	0.002303	1.46e-12	-	255492	1	IVNT	Neale-B_UKBB_EUR_2017
rs1056441	rs1056441	chr20:62370349	chr20:63738996	C/T	Forced vital capacity, best measure	EFO_0004312	Neale B	UKBB	European	2017	-0.01629	0.002303	1.5e-12	-	255492	1	IVNT	Neale-B_UKBB_EUR_2017
rs1056441	rs1056441	chr20:62370349	chr20:63738996	C/T	Forced vital capacity, best measure	EFO_0004312	Neale B	UKBB	European	2017	-0.01629	0.002303	1.54e-12	-	255492	1	IVNT	Neale-B_UKBB_EUR_2017
rs1056441	rs1056441	chr20:62370349	chr20:63738996	C/T	Forced vital capacity, best measure	EFO_0004312	Neale B	UKBB	European	2017	-0.01631	0.002307	1.55e-12	-	255492	1	IVNT	Neale-B_UKBB_EUR_2017
rs1056441	rs1056441	chr20:62370349	chr20:63738996	C/T	Forced vital capacity, best measure	EFO_0004312	Neale B	UKBB	European	2017	-0.01628	0.002303	1.56e-12	-	255492	1	IVNT	Neale-B_UKBB_EUR_2017
rs1056441	rs1056441	chr20:62370349	chr20:63738996	C/T	Forced vital capacity, best measure	EFO_0004312	Neale B	UKBB	European	2017	-0.01625	0.002303	1.73e-12	-	255492	1	IVNT	Neale-B_UKBB_EUR_2017
rs1056441	rs1056441	chr20:62370349	chr20:63738996	C/T	Forced vital capacity, best measure	EFO_0004312	Neale B	UKBB	European	2017	-0.01616	0.002291	1.73e-12	-	255492	1	IVNT	Neale-B_UKBB_EUR_2017
rs1056441	rs1056441	chr20:62370349	chr20:63738996	C/T	Forced vital capacity, best measure	EFO_0004312	Neale B	UKBB	European	2017	-0.01625	0.002303	1.76e-12	-	255492	1	IVNT	Neale-B_UKBB_EUR_2017
rs1056441	rs1056441	chr20:62370349	chr20:63738996	C/T	Leg fat percentage left	-	Neale B	UKBB	European	2017	0.0114	0.001616	1.76e-12	+	331278	1	IVNT	Neale-B_UKBB_EUR_2017
rs1056441	rs1056441	chr20:62370349	chr20:63738996	C/T	Forced vital capacity, best measure	EFO_0004312	Neale B	UKBB	European	2017	-0.01615	0.002291	1.77e-12	-	255492	1	IVNT	Neale-B_UKBB_EUR_2017
rs1056441	rs1056441	chr20:62370349	chr20:63738996	C/T	Forced vital capacity, best measure	EFO_0004312	Neale B	UKBB	European	2017	-0.01615	0.00229	1.8e-12	-	255492	1	IVNT	Neale-B_UKBB_EUR_2017
rs1056441	rs1056441	chr20:62370349	chr20:63738996	C/T	Forced vital capacity, best measure	EFO_0004312	Neale B	UKBB	European	2017	-0.01625	0.002305	1.81e-12	-	255492	1	IVNT	Neale-B_UKBB_EUR_2017
rs1056441	rs1056441	chr20:62370349	chr20:63738996	C/T	Forced vital capacity, best measure	EFO_0004312	Neale B	UKBB	European	2017	-0.01624	0.002305	1.85e-12	-	255492	1	IVNT	Neale-B_UKBB_EUR_2017
rs1056441	rs1056441	chr20:62370349	chr20:63738996	C/T	Leg fat percentage left	-	Neale B	UKBB	European	2017	0.01139	0.001617	1.86e-12	+	331278	1	IVNT	Neale-B_UKBB_EUR_2017
rs1056441	rs1056441	chr20:62370349	chr20:63738996	C/T	Leg fat percentage left	-	Neale B	UKBB	European	2017	0.01138	0.001616	1.91e-12	+	331278	1	IVNT	Neale-B_UKBB_EUR_2017
rs1056441	rs1056441	chr20:62370349	chr20:63738996	C/T	Forced vital capacity, best measure	EFO_0004312	Neale B	UKBB	European	2017	-0.01623	0.002305	1.92e-12	-	255492	1	IVNT	Neale-B_UKBB_EUR_2017
rs1056441	rs1056441	chr20:62370349	chr20:63738996	C/T	Forced vital capacity, best measure	EFO_0004312	Neale B	UKBB	European	2017	-0.01612	0.002291	1.97e-12	-	255492	1	IVNT	Neale-B_UKBB_EUR_2017
rs1056441	rs1056441	chr20:62370349	chr20:63738996	C/T	Leg fat percentage left	-	Neale B	UKBB	European	2017	0.01137	0.001616	2.01e-12	+	331278	1	IVNT	Neale-B_UKBB_EUR_2017
rs1056441	rs1056441	chr20:62370349	chr20:63738996	C/T	Leg fat percentage left	-	Neale B	UKBB	European	2017	0.01137	0.001616	2.02e-12	+	331278	1	IVNT	Neale-B_UKBB_EUR_2017
rs1056441	rs1056441	chr20:62370349	chr20:63738996	C/T	Leg fat percentage left	-	Neale B	UKBB	European	2017	0.01135	0.001616	2.13e-12	+	331278	1	IVNT	Neale-B_UKBB_EUR_2017
rs1056441	rs1056441	chr20:62370349	chr20:63738996	C/T	Forced vital capacity, best measure	EFO_0004312	Neale B	UKBB	European	2017	-0.01608	0.002291	2.25e-12	-	255492	1	IVNT	Neale-B_UKBB_EUR_2017
rs1056441	rs1056441	chr20:62370349	chr20:63738996	C/T	Leg fat percentage left	-	Neale B	UKBB	European	2017	0.01134	0.001616	2.31e-12	+	331278	1	IVNT	Neale-B_UKBB_EUR_2017
rs1056441	rs1056441	chr20:62370349	chr20:63738996	C/T	Leg fat percentage left	-	Neale B	UKBB	European	2017	0.01134	0.001617	2.41e-12	+	331278	1	IVNT	Neale-B_UKBB_EUR_2017
rs1056441	rs1056441	chr20:62370349	chr20:63738996	C/T	Crohns disease	EFO_0000384	IBDGC	23128233	European	2012	NA	NA	2.5e-12	NA	14342	7	log OR	IBDGC_Chrons-Disease_EUR_2012
rs1056441	rs1056441	chr20:62370349	chr20:63738996	C/T	Crohns disease	NCIT_C2965	Anderson CA	21297633	European	2011	NA	NA	2.51e-12	NA	26405	-	-	GRASP
rs1056441	rs1056441	chr20:62370349	chr20:63738996	C/T	Leg fat percentage left	-	Neale B	UKBB	European	2017	0.01132	0.001616	2.56e-12	+	331278	1	IVNT	Neale-B_UKBB_EUR_2017
rs1056441	rs1056441	chr20:62370349	chr20:63738996	C/T	Forced vital capacity, best measure	EFO_0004312	Neale B	UKBB	European	2017	-0.01605	0.002294	2.61e-12	-	255492	1	IVNT	Neale-B_UKBB_EUR_2017
rs1056441	rs1056441	chr20:62370349	chr20:63738996	C/T	Leg fat percentage left	-	Neale B	UKBB	European	2017	0.0113	0.001616	2.67e-12	+	331278	1	IVNT	Neale-B_UKBB_EUR_2017
rs1056441	rs1056441	chr20:62370349	chr20:63738996	C/T	Forced vital capacity	EFO_0004312	Neale B	UKBB	European	2017	-0.01513	0.002174	3.51e-12	-	307638	1	IVNT	Neale-B_UKBB_EUR_2017
rs1056441	rs1056441	chr20:62370349	chr20:63738996	C/T	Crohns disease	EFO_0000384	IBDGC	23128233	European	2012	NA	NA	4.2e-12	NA	14342	7	log OR	IBDGC_Chrons-Disease_EUR_2012
rs1056441	rs1056441	chr20:62370349	chr20:63738996	C/T	Crohns disease	EFO_0000384	IBDGC	23128233	European	2012	NA	NA	5.1e-12	NA	14342	7	log OR	IBDGC_Chrons-Disease_EUR_2012
rs1056441	rs1056441	chr20:62370349	chr20:63738996	C/T	Crohns disease	EFO_0000384	IBDGC	23128233	European	2012	NA	NA	5.6e-12	NA	14342	7	log OR	IBDGC_Chrons-Disease_EUR_2012
rs1056441	rs1056441	chr20:62370349	chr20:63738996	C/T	Body fat percentage	EFO_0007800	Neale B	UKBB	European	2017	0.01355	0.001985	8.69e-12	+	331117	1	IVNT	Neale-B_UKBB_EUR_2017
rs1056441	rs1056441	chr20:62370349	chr20:63738996	C/T	Forced vital capacity, best measure	EFO_0004312	Neale B	UKBB	European	2017	-0.01556	0.002289	1.07e-11	-	255492	1	IVNT	Neale-B_UKBB_EUR_2017
rs1056441	rs1056441	chr20:62370349	chr20:63738996	C/T	Body fat percentage	EFO_0007800	Neale B	UKBB	European	2017	0.01345	0.001981	1.14e-11	+	331117	1	IVNT	Neale-B_UKBB_EUR_2017
rs1056441	rs1056441	chr20:62370349	chr20:63738996	C/T	Forced expiratory volume in 1-second, predicted percentage	EFO_0004314	Neale B	UKBB	European	2017	-0.03062	0.004514	1.18e-11	-	110423	1	IVNT	Neale-B_UKBB_EUR_2017
rs1056441	rs1056441	chr20:62370349	chr20:63738996	C/T	Forced vital capacity, best measure	EFO_0004312	Neale B	UKBB	European	2017	-0.01553	0.002289	1.18e-11	-	255492	1	IVNT	Neale-B_UKBB_EUR_2017
rs1056441	rs1056441	chr20:62370349	chr20:63738996	C/T	Body fat percentage	EFO_0007800	Neale B	UKBB	European	2017	0.01344	0.001983	1.23e-11	+	331117	1	IVNT	Neale-B_UKBB_EUR_2017
rs1056441	rs1056441	chr20:62370349	chr20:63738996	C/T	Forced expiratory volume in 1-second, predicted percentage	EFO_0004314	Neale B	UKBB	European	2017	-0.0307	0.004536	1.31e-11	-	110423	1	IVNT	Neale-B_UKBB_EUR_2017
rs1056441	rs1056441	chr20:62370349	chr20:63738996	C/T	Body fat percentage	EFO_0007800	Neale B	UKBB	European	2017	0.01341	0.001982	1.33e-11	+	331117	1	IVNT	Neale-B_UKBB_EUR_2017
rs1056441	rs1056441	chr20:62370349	chr20:63738996	C/T	Body fat percentage	EFO_0007800	Neale B	UKBB	European	2017	0.0134	0.001981	1.36e-11	+	331117	1	IVNT	Neale-B_UKBB_EUR_2017
rs1056441	rs1056441	chr20:62370349	chr20:63738996	C/T	Body fat percentage	EFO_0007800	Neale B	UKBB	European	2017	0.0134	0.001981	1.37e-11	+	331117	1	IVNT	Neale-B_UKBB_EUR_2017
rs1056441	rs1056441	chr20:62370349	chr20:63738996	C/T	Leg fat percentage left	-	Neale B	UKBB	European	2017	0.01087	0.001608	1.38e-11	+	331278	1	IVNT	Neale-B_UKBB_EUR_2017
rs1056441	rs1056441	chr20:62370349	chr20:63738996	C/T	Leg fat percentage left	-	Neale B	UKBB	European	2017	0.01086	0.001607	1.4e-11	+	331278	1	IVNT	Neale-B_UKBB_EUR_2017
rs1056441	rs1056441	chr20:62370349	chr20:63738996	C/T	Body fat percentage	EFO_0007800	Neale B	UKBB	European	2017	0.01339	0.001981	1.41e-11	+	331117	1	IVNT	Neale-B_UKBB_EUR_2017
rs1056441	rs1056441	chr20:62370349	chr20:63738996	C/T	Forced expiratory volume in 1-second, predicted percentage	EFO_0004314	Neale B	UKBB	European	2017	-0.03049	0.004513	1.41e-11	-	110423	1	IVNT	Neale-B_UKBB_EUR_2017
rs1056441	rs1056441	chr20:62370349	chr20:63738996	C/T	Forced expiratory volume in 1-second, predicted percentage	EFO_0004314	Neale B	UKBB	European	2017	-0.03065	0.004536	1.42e-11	-	110423	1	IVNT	Neale-B_UKBB_EUR_2017
rs1056441	rs1056441	chr20:62370349	chr20:63738996	C/T	Forced expiratory volume in 1-second, predicted percentage	EFO_0004314	Neale B	UKBB	European	2017	-0.03049	0.004513	1.42e-11	-	110423	1	IVNT	Neale-B_UKBB_EUR_2017
rs1056441	rs1056441	chr20:62370349	chr20:63738996	C/T	Forced expiratory volume in 1-second, predicted percentage	EFO_0004314	Neale B	UKBB	European	2017	-0.03049	0.004513	1.44e-11	-	110423	1	IVNT	Neale-B_UKBB_EUR_2017
rs1056441	rs1056441	chr20:62370349	chr20:63738996	C/T	Leg fat percentage left	-	Neale B	UKBB	European	2017	0.01086	0.001608	1.44e-11	+	331278	1	IVNT	Neale-B_UKBB_EUR_2017
rs1056441	rs1056441	chr20:62370349	chr20:63738996	C/T	Forced expiratory volume in 1-second, predicted percentage	EFO_0004314	Neale B	UKBB	European	2017	-0.03063	0.004536	1.46e-11	-	110423	1	IVNT	Neale-B_UKBB_EUR_2017
rs1056441	rs1056441	chr20:62370349	chr20:63738996	C/T	Forced expiratory volume in 1-second, predicted percentage	EFO_0004314	Neale B	UKBB	European	2017	-0.03063	0.004536	1.47e-11	-	110423	1	IVNT	Neale-B_UKBB_EUR_2017
rs1056441	rs1056441	chr20:62370349	chr20:63738996	C/T	Forced expiratory volume in 1-second, predicted percentage	EFO_0004314	Neale B	UKBB	European	2017	-0.03061	0.004536	1.52e-11	-	110423	1	IVNT	Neale-B_UKBB_EUR_2017
rs1056441	rs1056441	chr20:62370349	chr20:63738996	C/T	Forced expiratory volume in 1-second, predicted percentage	EFO_0004314	Neale B	UKBB	European	2017	-0.0306	0.004536	1.53e-11	-	110423	1	IVNT	Neale-B_UKBB_EUR_2017
rs1056441	rs1056441	chr20:62370349	chr20:63738996	C/T	Forced expiratory volume in 1-second	EFO_0004314	Neale B	UKBB	European	2017	-0.01484	0.002201	1.57e-11	-	307638	1	IVNT	Neale-B_UKBB_EUR_2017
rs1056441	rs1056441	chr20:62370349	chr20:63738996	C/T	Forced expiratory volume in 1-second, predicted percentage	EFO_0004314	Neale B	UKBB	European	2017	-0.03042	0.004512	1.58e-11	-	110423	1	IVNT	Neale-B_UKBB_EUR_2017
rs1056441	rs1056441	chr20:62370349	chr20:63738996	C/T	Body fat percentage	EFO_0007800	Neale B	UKBB	European	2017	0.01337	0.001983	1.59e-11	+	331117	1	IVNT	Neale-B_UKBB_EUR_2017
rs1056441	rs1056441	chr20:62370349	chr20:63738996	C/T	Forced expiratory volume in 1-second	EFO_0004314	Neale B	UKBB	European	2017	-0.01482	0.002201	1.66e-11	-	307638	1	IVNT	Neale-B_UKBB_EUR_2017
rs1056441	rs1056441	chr20:62370349	chr20:63738996	C/T	Body fat percentage	EFO_0007800	Neale B	UKBB	European	2017	0.01334	0.001981	1.67e-11	+	331117	1	IVNT	Neale-B_UKBB_EUR_2017
rs1056441	rs1056441	chr20:62370349	chr20:63738996	C/T	Forced expiratory volume in 1-second, predicted percentage	EFO_0004314	Neale B	UKBB	European	2017	-0.03056	0.004539	1.68e-11	-	110423	1	IVNT	Neale-B_UKBB_EUR_2017
rs1056441	rs1056441	chr20:62370349	chr20:63738996	C/T	Forced expiratory volume in 1-second	EFO_0004314	Neale B	UKBB	European	2017	-0.01481	0.002201	1.69e-11	-	307638	1	IVNT	Neale-B_UKBB_EUR_2017
rs1056441	rs1056441	chr20:62370349	chr20:63738996	C/T	Forced expiratory volume in 1-second, predicted percentage	EFO_0004314	Neale B	UKBB	European	2017	-0.03039	0.004518	1.74e-11	-	110423	1	IVNT	Neale-B_UKBB_EUR_2017
rs1056441	rs1056441	chr20:62370349	chr20:63738996	C/T	Leg fat percentage left	-	Neale B	UKBB	European	2017	0.01081	0.001608	1.8e-11	+	331278	1	IVNT	Neale-B_UKBB_EUR_2017
rs1056441	rs1056441	chr20:62370349	chr20:63738996	C/T	Forced expiratory volume in 1-second, predicted percentage	EFO_0004314	Neale B	UKBB	European	2017	-0.03049	0.004537	1.81e-11	-	110423	1	IVNT	Neale-B_UKBB_EUR_2017
rs1056441	rs1056441	chr20:62370349	chr20:63738996	C/T	Body fat percentage	EFO_0007800	Neale B	UKBB	European	2017	0.01331	0.001982	1.85e-11	+	331117	1	IVNT	Neale-B_UKBB_EUR_2017
rs1056441	rs1056441	chr20:62370349	chr20:63738996	C/T	Body fat percentage	EFO_0007800	Neale B	UKBB	European	2017	0.01331	0.001982	1.86e-11	+	331117	1	IVNT	Neale-B_UKBB_EUR_2017
rs1056441	rs1056441	chr20:62370349	chr20:63738996	C/T	Forced expiratory volume in 1-second	EFO_0004314	Neale B	UKBB	European	2017	-0.01478	0.002201	1.87e-11	-	307638	1	IVNT	Neale-B_UKBB_EUR_2017
rs1056441	rs1056441	chr20:62370349	chr20:63738996	C/T	Forced expiratory volume in 1-second, predicted percentage	EFO_0004314	Neale B	UKBB	European	2017	-0.03048	0.004541	1.93e-11	-	110423	1	IVNT	Neale-B_UKBB_EUR_2017
rs1056441	rs1056441	chr20:62370349	chr20:63738996	C/T	Forced expiratory volume in 1-second	EFO_0004314	Neale B	UKBB	European	2017	-0.01476	0.002201	2e-11	-	307638	1	IVNT	Neale-B_UKBB_EUR_2017
rs1056441	rs1056441	chr20:62370349	chr20:63738996	C/T	Forced expiratory volume in 1-second, predicted percentage	EFO_0004314	Neale B	UKBB	European	2017	-0.03041	0.004536	2.05e-11	-	110423	1	IVNT	Neale-B_UKBB_EUR_2017
rs1056441	rs1056441	chr20:62370349	chr20:63738996	C/T	Leg fat percentage left	-	Neale B	UKBB	European	2017	0.01079	0.00161	2.11e-11	+	331278	1	IVNT	Neale-B_UKBB_EUR_2017
rs1056441	rs1056441	chr20:62370349	chr20:63738996	C/T	Leg fat percentage left	-	Neale B	UKBB	European	2017	0.01076	0.001607	2.17e-11	+	331278	1	IVNT	Neale-B_UKBB_EUR_2017
rs1056441	rs1056441	chr20:62370349	chr20:63738996	C/T	Body fat percentage	EFO_0007800	Neale B	UKBB	European	2017	0.01327	0.001983	2.23e-11	+	331117	1	IVNT	Neale-B_UKBB_EUR_2017
rs1056441	rs1056441	chr20:62370349	chr20:63738996	C/T	Forced expiratory volume in 1-second	EFO_0004314	Neale B	UKBB	European	2017	-0.01472	0.002204	2.42e-11	-	307638	1	IVNT	Neale-B_UKBB_EUR_2017
rs1056441	rs1056441	chr20:62370349	chr20:63738996	C/T	Forced expiratory volume in 1-second, predicted percentage	EFO_0004314	Neale B	UKBB	European	2017	-0.03026	0.00454	2.66e-11	-	110423	1	IVNT	Neale-B_UKBB_EUR_2017
rs1056441	rs1056441	chr20:62370349	chr20:63738996	C/T	Forced expiratory volume in 1-second, predicted percentage	EFO_0004314	Neale B	UKBB	European	2017	-0.03026	0.004545	2.78e-11	-	110423	1	IVNT	Neale-B_UKBB_EUR_2017
rs1056441	rs1056441	chr20:62370349	chr20:63738996	C/T	Whole body fat mass	-	Neale B	UKBB	European	2017	0.0168	0.002526	2.93e-11	+	330762	1	IVNT	Neale-B_UKBB_EUR_2017
rs1056441	rs1056441	chr20:62370349	chr20:63738996	C/T	Trunk fat percentage	-	Neale B	UKBB	European	2017	0.01581	0.00238	3.05e-11	+	331113	1	IVNT	Neale-B_UKBB_EUR_2017
rs1056441	rs1056441	chr20:62370349	chr20:63738996	C/T	Whole body fat mass	-	Neale B	UKBB	European	2017	0.01672	0.002522	3.36e-11	+	330762	1	IVNT	Neale-B_UKBB_EUR_2017
rs1056441	rs1056441	chr20:62370349	chr20:63738996	C/T	Whole body fat mass	-	Neale B	UKBB	European	2017	0.01672	0.002523	3.44e-11	+	330762	1	IVNT	Neale-B_UKBB_EUR_2017
rs1056441	rs1056441	chr20:62370349	chr20:63738996	C/T	Leg fat percentage right	-	Neale B	UKBB	European	2017	0.01086	0.00164	3.6e-11	+	331296	1	IVNT	Neale-B_UKBB_EUR_2017
rs1056441	rs1056441	chr20:62370349	chr20:63738996	C/T	Whole body fat mass	-	Neale B	UKBB	European	2017	0.01669	0.002522	3.63e-11	+	330762	1	IVNT	Neale-B_UKBB_EUR_2017
rs1056441	rs1056441	chr20:62370349	chr20:63738996	C/T	Trunk fat mass	EFO_0005409	Neale B	UKBB	European	2017	0.01725	0.002607	3.65e-11	+	331093	1	IVNT	Neale-B_UKBB_EUR_2017
rs1056441	rs1056441	chr20:62370349	chr20:63738996	C/T	Whole body fat mass	-	Neale B	UKBB	European	2017	0.01668	0.002522	3.74e-11	+	330762	1	IVNT	Neale-B_UKBB_EUR_2017
rs1056441	rs1056441	chr20:62370349	chr20:63738996	C/T	Whole body fat mass	-	Neale B	UKBB	European	2017	0.01667	0.002522	3.84e-11	+	330762	1	IVNT	Neale-B_UKBB_EUR_2017
rs1056441	rs1056441	chr20:62370349	chr20:63738996	C/T	Forced expiratory volume in 1-second, predicted percentage	EFO_0004314	Neale B	UKBB	European	2017	-0.02981	0.00451	3.85e-11	-	110423	1	IVNT	Neale-B_UKBB_EUR_2017
rs1056441	rs1056441	chr20:62370349	chr20:63738996	C/T	Leg fat percentage right	-	Neale B	UKBB	European	2017	0.01083	0.001638	3.87e-11	+	331296	1	IVNT	Neale-B_UKBB_EUR_2017
rs1056441	rs1056441	chr20:62370349	chr20:63738996	C/T	Trunk fat percentage	-	Neale B	UKBB	European	2017	0.01569	0.002375	3.95e-11	+	331113	1	IVNT	Neale-B_UKBB_EUR_2017
rs1056441	rs1056441	chr20:62370349	chr20:63738996	C/T	Trunk fat percentage	-	Neale B	UKBB	European	2017	0.0157	0.002377	4.01e-11	+	331113	1	IVNT	Neale-B_UKBB_EUR_2017
rs1056441	rs1056441	chr20:62370349	chr20:63738996	C/T	Whole body fat mass	-	Neale B	UKBB	European	2017	0.01666	0.002524	4.08e-11	+	330762	1	IVNT	Neale-B_UKBB_EUR_2017
rs1056441	rs1056441	chr20:62370349	chr20:63738996	C/T	Whole body fat mass	-	Neale B	UKBB	European	2017	0.01664	0.002522	4.18e-11	+	330762	1	IVNT	Neale-B_UKBB_EUR_2017
rs1056441	rs1056441	chr20:62370349	chr20:63738996	C/T	Trunk fat mass	EFO_0005409	Neale B	UKBB	European	2017	0.01716	0.002602	4.3e-11	+	331093	1	IVNT	Neale-B_UKBB_EUR_2017
rs1056441	rs1056441	chr20:62370349	chr20:63738996	C/T	Trunk fat percentage	-	Neale B	UKBB	European	2017	0.01564	0.002375	4.55e-11	+	331113	1	IVNT	Neale-B_UKBB_EUR_2017
rs1056441	rs1056441	chr20:62370349	chr20:63738996	C/T	Trunk fat percentage	-	Neale B	UKBB	European	2017	0.01564	0.002375	4.6e-11	+	331113	1	IVNT	Neale-B_UKBB_EUR_2017
rs1056441	rs1056441	chr20:62370349	chr20:63738996	C/T	Whole body fat mass	-	Neale B	UKBB	European	2017	0.0166	0.002521	4.64e-11	+	330762	1	IVNT	Neale-B_UKBB_EUR_2017
rs1056441	rs1056441	chr20:62370349	chr20:63738996	C/T	Trunk fat mass	EFO_0005409	Neale B	UKBB	European	2017	0.01713	0.002604	4.71e-11	+	331093	1	IVNT	Neale-B_UKBB_EUR_2017
rs1056441	rs1056441	chr20:62370349	chr20:63738996	C/T	Trunk fat mass	EFO_0005409	Neale B	UKBB	European	2017	0.01712	0.002602	4.78e-11	+	331093	1	IVNT	Neale-B_UKBB_EUR_2017
rs1056441	rs1056441	chr20:62370349	chr20:63738996	C/T	Leg fat percentage right	-	Neale B	UKBB	European	2017	0.01076	0.001637	4.82e-11	+	331296	1	IVNT	Neale-B_UKBB_EUR_2017
rs1056441	rs1056441	chr20:62370349	chr20:63738996	C/T	Trunk fat percentage	-	Neale B	UKBB	European	2017	0.01562	0.002375	4.82e-11	+	331113	1	IVNT	Neale-B_UKBB_EUR_2017
rs1056441	rs1056441	chr20:62370349	chr20:63738996	C/T	Trunk fat mass	EFO_0005409	Neale B	UKBB	European	2017	0.01711	0.002602	4.87e-11	+	331093	1	IVNT	Neale-B_UKBB_EUR_2017
rs1056441	rs1056441	chr20:62370349	chr20:63738996	C/T	Trunk fat percentage	-	Neale B	UKBB	European	2017	0.01562	0.002375	4.91e-11	+	331113	1	IVNT	Neale-B_UKBB_EUR_2017
rs1056441	rs1056441	chr20:62370349	chr20:63738996	C/T	Leg fat percentage right	-	Neale B	UKBB	European	2017	0.01076	0.001638	5.03e-11	+	331296	1	IVNT	Neale-B_UKBB_EUR_2017
rs1056441	rs1056441	chr20:62370349	chr20:63738996	C/T	Leg fat percentage right	-	Neale B	UKBB	European	2017	0.01075	0.001637	5.09e-11	+	331296	1	IVNT	Neale-B_UKBB_EUR_2017
rs1056441	rs1056441	chr20:62370349	chr20:63738996	C/T	Trunk fat mass	EFO_0005409	Neale B	UKBB	European	2017	0.01709	0.002602	5.12e-11	+	331093	1	IVNT	Neale-B_UKBB_EUR_2017
rs1056441	rs1056441	chr20:62370349	chr20:63738996	C/T	Leg fat percentage right	-	Neale B	UKBB	European	2017	0.01074	0.001637	5.25e-11	+	331296	1	IVNT	Neale-B_UKBB_EUR_2017
rs1056441	rs1056441	chr20:62370349	chr20:63738996	C/T	Leg fat percentage right	-	Neale B	UKBB	European	2017	0.01074	0.001637	5.36e-11	+	331296	1	IVNT	Neale-B_UKBB_EUR_2017
rs1056441	rs1056441	chr20:62370349	chr20:63738996	C/T	Trunk fat mass	EFO_0005409	Neale B	UKBB	European	2017	0.01707	0.002602	5.39e-11	+	331093	1	IVNT	Neale-B_UKBB_EUR_2017
rs1056441	rs1056441	chr20:62370349	chr20:63738996	C/T	Whole body fat mass	-	Neale B	UKBB	European	2017	0.01654	0.002522	5.4e-11	+	330762	1	IVNT	Neale-B_UKBB_EUR_2017
rs1056441	rs1056441	chr20:62370349	chr20:63738996	C/T	Crohns disease	EFO_0000384	IBDGC	26192919	European	2015	0.167	0.0255	5.44e-11	+	20883	7	log OR	IBDGC_Chrons-Disease_EUR_2015
rs1056441	rs1056441	chr20:62370349	chr20:63738996	C/T	Whole body fat mass	-	Neale B	UKBB	European	2017	0.01654	0.002522	5.45e-11	+	330762	1	IVNT	Neale-B_UKBB_EUR_2017
rs1056441	rs1056441	chr20:62370349	chr20:63738996	C/T	Trunk fat mass	EFO_0005409	Neale B	UKBB	European	2017	0.01708	0.002605	5.52e-11	+	331093	1	IVNT	Neale-B_UKBB_EUR_2017
rs1056441	rs1056441	chr20:62370349	chr20:63738996	C/T	Whole body fat mass	-	Neale B	UKBB	European	2017	0.01654	0.002524	5.54e-11	+	330762	1	IVNT	Neale-B_UKBB_EUR_2017
rs1056441	rs1056441	chr20:62370349	chr20:63738996	C/T	Leg fat percentage right	-	Neale B	UKBB	European	2017	0.01073	0.001637	5.66e-11	+	331296	1	IVNT	Neale-B_UKBB_EUR_2017
rs1056441	rs1056441	chr20:62370349	chr20:63738996	C/T	Forced expiratory volume in 1-second, predicted percentage	EFO_0004314	Neale B	UKBB	European	2017	-0.02955	0.00451	5.75e-11	-	110423	1	IVNT	Neale-B_UKBB_EUR_2017
rs1056441	rs1056441	chr20:62370349	chr20:63738996	C/T	Forced vital capacity, best measure	EFO_0004312	Neale B	UKBB	European	2017	-0.015	0.002291	5.8e-11	-	255492	1	IVNT	Neale-B_UKBB_EUR_2017
rs1056441	rs1056441	chr20:62370349	chr20:63738996	C/T	Trunk fat percentage	-	Neale B	UKBB	European	2017	0.01555	0.002375	5.82e-11	+	331113	1	IVNT	Neale-B_UKBB_EUR_2017
rs1056441	rs1056441	chr20:62370349	chr20:63738996	C/T	Leg fat percentage right	-	Neale B	UKBB	European	2017	0.01071	0.001637	6.05e-11	+	331296	1	IVNT	Neale-B_UKBB_EUR_2017
rs1056441	rs1056441	chr20:62370349	chr20:63738996	C/T	Trunk fat mass	EFO_0005409	Neale B	UKBB	European	2017	0.01702	0.002602	6.05e-11	+	331093	1	IVNT	Neale-B_UKBB_EUR_2017
rs1056441	rs1056441	chr20:62370349	chr20:63738996	C/T	Leg fat percentage right	-	Neale B	UKBB	European	2017	0.0107	0.001637	6.24e-11	+	331296	1	IVNT	Neale-B_UKBB_EUR_2017
rs1056441	rs1056441	chr20:62370349	chr20:63738996	C/T	Trunk fat percentage	-	Neale B	UKBB	European	2017	0.01552	0.002376	6.4e-11	+	331113	1	IVNT	Neale-B_UKBB_EUR_2017
rs1056441	rs1056441	chr20:62370349	chr20:63738996	C/T	Trunk fat percentage	-	Neale B	UKBB	European	2017	0.01552	0.002376	6.5e-11	+	331113	1	IVNT	Neale-B_UKBB_EUR_2017
rs1056441	rs1056441	chr20:62370349	chr20:63738996	C/T	Forced expiratory volume in 1-second	EFO_0004314	Neale B	UKBB	European	2017	-0.01445	0.002213	6.61e-11	-	307638	1	IVNT	Neale-B_UKBB_EUR_2017
rs1056441	rs1056441	chr20:62370349	chr20:63738996	C/T	Forced expiratory volume in 1-second	EFO_0004314	Neale B	UKBB	European	2017	-0.01446	0.002214	6.63e-11	-	307638	1	IVNT	Neale-B_UKBB_EUR_2017
rs1056441	rs1056441	chr20:62370349	chr20:63738996	C/T	Leg fat percentage right	-	Neale B	UKBB	European	2017	0.01069	0.001638	6.64e-11	+	331296	1	IVNT	Neale-B_UKBB_EUR_2017
rs1056441	rs1056441	chr20:62370349	chr20:63738996	C/T	Leg fat percentage left	-	Neale B	UKBB	European	2017	0.01049	0.001606	6.65e-11	+	331278	1	IVNT	Neale-B_UKBB_EUR_2017
rs1056441	rs1056441	chr20:62370349	chr20:63738996	C/T	Leg fat percentage right	-	Neale B	UKBB	European	2017	0.01068	0.001637	6.76e-11	+	331296	1	IVNT	Neale-B_UKBB_EUR_2017
rs1056441	rs1056441	chr20:62370349	chr20:63738996	C/T	Forced expiratory volume in 1-second	EFO_0004314	Neale B	UKBB	European	2017	-0.01444	0.002213	6.78e-11	-	307638	1	IVNT	Neale-B_UKBB_EUR_2017
rs1056441	rs1056441	chr20:62370349	chr20:63738996	C/T	Trunk fat percentage	-	Neale B	UKBB	European	2017	0.01551	0.002378	6.89e-11	+	331113	1	IVNT	Neale-B_UKBB_EUR_2017
rs1056441	rs1056441	chr20:62370349	chr20:63738996	C/T	Trunk fat mass	EFO_0005409	Neale B	UKBB	European	2017	0.01697	0.002602	7.04e-11	+	331093	1	IVNT	Neale-B_UKBB_EUR_2017
rs1056441	rs1056441	chr20:62370349	chr20:63738996	C/T	Trunk fat mass	EFO_0005409	Neale B	UKBB	European	2017	0.01696	0.002602	7.11e-11	+	331093	1	IVNT	Neale-B_UKBB_EUR_2017
rs1056441	rs1056441	chr20:62370349	chr20:63738996	C/T	Forced expiratory volume in 1-second	EFO_0004314	Neale B	UKBB	European	2017	-0.01442	0.002213	7.19e-11	-	307638	1	IVNT	Neale-B_UKBB_EUR_2017
rs1056441	rs1056441	chr20:62370349	chr20:63738996	C/T	Forced expiratory volume in 1-second	EFO_0004314	Neale B	UKBB	European	2017	-0.01442	0.002213	7.27e-11	-	307638	1	IVNT	Neale-B_UKBB_EUR_2017
rs1056441	rs1056441	chr20:62370349	chr20:63738996	C/T	Crohns disease	EFO_0000384	IBDGC	26192919	European	2015	0.1642	0.0252	7.28e-11	+	20883	7	log OR	IBDGC_Chrons-Disease_EUR_2015
rs1056441	rs1056441	chr20:62370349	chr20:63738996	C/T	Forced expiratory volume in 1-second	EFO_0004314	Neale B	UKBB	European	2017	-0.01444	0.002217	7.32e-11	-	307638	1	IVNT	Neale-B_UKBB_EUR_2017
rs1056441	rs1056441	chr20:62370349	chr20:63738996	C/T	Trunk fat mass	EFO_0005409	Neale B	UKBB	European	2017	0.01696	0.002604	7.37e-11	+	331093	1	IVNT	Neale-B_UKBB_EUR_2017
rs1056441	rs1056441	chr20:62370349	chr20:63738996	C/T	Forced expiratory volume in 1-second	EFO_0004314	Neale B	UKBB	European	2017	-0.01441	0.002213	7.51e-11	-	307638	1	IVNT	Neale-B_UKBB_EUR_2017
rs1056441	rs1056441	chr20:62370349	chr20:63738996	C/T	Forced expiratory volume in 1-second	EFO_0004314	Neale B	UKBB	European	2017	-0.0144	0.002213	7.61e-11	-	307638	1	IVNT	Neale-B_UKBB_EUR_2017
rs1056441	rs1056441	chr20:62370349	chr20:63738996	C/T	Body fat percentage	EFO_0007800	Neale B	UKBB	European	2017	0.01282	0.001971	7.8e-11	+	331117	1	IVNT	Neale-B_UKBB_EUR_2017
rs1056441	rs1056441	chr20:62370349	chr20:63738996	C/T	Forced expiratory volume in 1-second	EFO_0004314	Neale B	UKBB	European	2017	-0.01438	0.002213	8.06e-11	-	307638	1	IVNT	Neale-B_UKBB_EUR_2017
rs1056441	rs1056441	chr20:62370349	chr20:63738996	C/T	Forced expiratory volume in 1-second	EFO_0004314	Neale B	UKBB	European	2017	-0.01438	0.002213	8.17e-11	-	307638	1	IVNT	Neale-B_UKBB_EUR_2017
rs1056441	rs1056441	chr20:62370349	chr20:63738996	C/T	Body fat percentage	EFO_0007800	Neale B	UKBB	European	2017	0.0128	0.001971	8.43e-11	+	331117	1	IVNT	Neale-B_UKBB_EUR_2017
rs1056441	rs1056441	chr20:62370349	chr20:63738996	C/T	Trunk fat percentage	-	Neale B	UKBB	European	2017	0.01543	0.002377	8.63e-11	+	331113	1	IVNT	Neale-B_UKBB_EUR_2017
rs1056441	rs1056441	chr20:62370349	chr20:63738996	C/T	Body fat percentage	EFO_0007800	Neale B	UKBB	European	2017	0.01279	0.001971	8.74e-11	+	331117	1	IVNT	Neale-B_UKBB_EUR_2017
rs1056441	rs1056441	chr20:62370349	chr20:63738996	C/T	Body fat percentage	EFO_0007800	Neale B	UKBB	European	2017	0.01279	0.001971	8.78e-11	+	331117	1	IVNT	Neale-B_UKBB_EUR_2017
rs1056441	rs1056441	chr20:62370349	chr20:63738996	C/T	Forced expiratory volume in 1-second	EFO_0004314	Neale B	UKBB	European	2017	-0.01426	0.002199	9.04e-11	-	307638	1	IVNT	Neale-B_UKBB_EUR_2017
rs1056441	rs1056441	chr20:62370349	chr20:63738996	C/T	Crohns disease	EFO_0000384	IBDGC	26192919	European	2015	0.1641	0.0254	9.83e-11	+	20883	7	log OR	IBDGC_Chrons-Disease_EUR_2015
rs1056441	rs1056441	chr20:62370349	chr20:63738996	C/T	Crohns disease	EFO_0000384	IBDGC	26192919	European	2015	0.1628	0.0252	1.04e-10	+	20883	7	log OR	IBDGC_Chrons-Disease_EUR_2015
rs1056441	rs1056441	chr20:62370349	chr20:63738996	C/T	Body fat percentage	EFO_0007800	Neale B	UKBB	European	2017	0.01275	0.001974	1.07e-10	+	331117	1	IVNT	Neale-B_UKBB_EUR_2017
rs1056441	rs1056441	chr20:62370349	chr20:63738996	C/T	Leg fat percentage left	-	Neale B	UKBB	European	2017	0.01037	0.001606	1.08e-10	+	331278	1	IVNT	Neale-B_UKBB_EUR_2017
rs1056441	rs1056441	chr20:62370349	chr20:63738996	C/T	Leg fat percentage left	-	Neale B	UKBB	European	2017	0.01036	0.001608	1.15e-10	+	331278	1	IVNT	Neale-B_UKBB_EUR_2017
rs1056441	rs1056441	chr20:62370349	chr20:63738996	C/T	Crohns disease	EFO_0000384	IBDGC	26192919	European	2015	0.1624	0.0252	1.16e-10	+	20883	7	log OR	IBDGC_Chrons-Disease_EUR_2015
rs1056441	rs1056441	chr20:62370349	chr20:63738996	C/T	Forced expiratory volume in 1-second	EFO_0004314	Neale B	UKBB	European	2017	-0.01427	0.002215	1.18e-10	-	307638	1	IVNT	Neale-B_UKBB_EUR_2017
rs1056441	rs1056441	chr20:62370349	chr20:63738996	C/T	Crohns disease	EFO_0000384	IBDGC	26192919	European	2015	0.1622	0.0252	1.2e-10	+	20883	7	log OR	IBDGC_Chrons-Disease_EUR_2015
rs1056441	rs1056441	chr20:62370349	chr20:63738996	C/T	Body fat percentage	EFO_0007800	Neale B	UKBB	European	2017	0.01269	0.001971	1.2e-10	+	331117	1	IVNT	Neale-B_UKBB_EUR_2017
rs1056441	rs1056441	chr20:62370349	chr20:63738996	C/T	Crohns disease	EFO_0000384	IBDGC	26192919	European	2015	0.1634	0.0254	1.21e-10	+	20883	7	log OR	IBDGC_Chrons-Disease_EUR_2015
rs1056441	rs1056441	chr20:62370349	chr20:63738996	C/T	Forced expiratory volume in 1-second	EFO_0004314	Neale B	UKBB	European	2017	-0.01425	0.002214	1.25e-10	-	307638	1	IVNT	Neale-B_UKBB_EUR_2017
rs1056441	rs1056441	chr20:62370349	chr20:63738996	C/T	Crohns disease	EFO_0000384	IBDGC	26192919	European	2015	0.1627	0.0253	1.3e-10	+	20883	7	log OR	IBDGC_Chrons-Disease_EUR_2015
rs1056441	rs1056441	chr20:62370349	chr20:63738996	C/T	Crohns disease	EFO_0000384	IBDGC	26192919	European	2015	0.1628	0.0254	1.51e-10	+	20883	7	log OR	IBDGC_Chrons-Disease_EUR_2015
rs1056441	rs1056441	chr20:62370349	chr20:63738996	C/T	Forced expiratory volume in 1-second, predicted percentage	EFO_0004314	Neale B	UKBB	European	2017	-0.0289	0.004514	1.55e-10	-	110423	1	IVNT	Neale-B_UKBB_EUR_2017
rs1056441	rs1056441	chr20:62370349	chr20:63738996	C/T	Crohns disease	EFO_0000384	IBDGC	26192919	European	2015	0.1624	0.0254	1.58e-10	+	20883	7	log OR	IBDGC_Chrons-Disease_EUR_2015
rs1056441	rs1056441	chr20:62370349	chr20:63738996	C/T	Crohns disease	EFO_0000384	IBDGC	26192919	European	2015	0.1615	0.0253	1.62e-10	+	20883	7	log OR	IBDGC_Chrons-Disease_EUR_2015
rs1056441	rs1056441	chr20:62370349	chr20:63738996	C/T	Forced expiratory volume in 1-second	EFO_0004314	Neale B	UKBB	European	2017	-0.01406	0.002199	1.63e-10	-	307638	1	IVNT	Neale-B_UKBB_EUR_2017
rs1056441	rs1056441	chr20:62370349	chr20:63738996	C/T	Crohns disease	EFO_0000384	IBDGC	26192919	European	2015	0.1619	0.0254	1.7e-10	+	20883	7	log OR	IBDGC_Chrons-Disease_EUR_2015
rs1056441	rs1056441	chr20:62370349	chr20:63738996	C/T	Crohns disease	EFO_0000384	IBDGC	26192919	European	2015	0.1634	0.0256	1.78e-10	+	20883	7	log OR	IBDGC_Chrons-Disease_EUR_2015
rs1056441	rs1056441	chr20:62370349	chr20:63738996	C/T	Crohns disease	EFO_0000384	IBDGC	26192919	European	2015	0.1618	0.0254	1.79e-10	+	20883	7	log OR	IBDGC_Chrons-Disease_EUR_2015
rs1056441	rs1056441	chr20:62370349	chr20:63738996	C/T	Trunk fat percentage	-	Neale B	UKBB	European	2017	0.01502	0.002363	2.1e-10	+	331113	1	IVNT	Neale-B_UKBB_EUR_2017
rs1056441	rs1056441	chr20:62370349	chr20:63738996	C/T	Trunk fat percentage	-	Neale B	UKBB	European	2017	0.01501	0.002363	2.15e-10	+	331113	1	IVNT	Neale-B_UKBB_EUR_2017
rs1056441	rs1056441	chr20:62370349	chr20:63738996	C/T	Trunk fat percentage	-	Neale B	UKBB	European	2017	0.01494	0.002363	2.56e-10	+	331113	1	IVNT	Neale-B_UKBB_EUR_2017
rs1056441	rs1056441	chr20:62370349	chr20:63738996	C/T	Trunk fat percentage	-	Neale B	UKBB	European	2017	0.01494	0.002363	2.58e-10	+	331113	1	IVNT	Neale-B_UKBB_EUR_2017
rs1056441	rs1056441	chr20:62370349	chr20:63738996	C/T	Crohns disease	EFO_0000384	IBDGC	26192919	European	2015	0.1612	0.0255	2.65e-10	+	20883	7	log OR	IBDGC_Chrons-Disease_EUR_2015
rs1056441	rs1056441	chr20:62370349	chr20:63738996	C/T	Trunk fat percentage	-	Neale B	UKBB	European	2017	0.01492	0.002367	2.89e-10	+	331113	1	IVNT	Neale-B_UKBB_EUR_2017
rs1056441	rs1056441	chr20:62370349	chr20:63738996	C/T	Body fat percentage	EFO_0007800	Neale B	UKBB	European	2017	0.01241	0.00197	2.93e-10	+	331117	1	IVNT	Neale-B_UKBB_EUR_2017
rs1056441	rs1056441	chr20:62370349	chr20:63738996	C/T	Crohns disease	EFO_0000384	IBDGC	26192919	European	2015	0.1583	0.0251	3.04e-10	+	20883	7	log OR	IBDGC_Chrons-Disease_EUR_2015
rs1056441	rs1056441	chr20:62370349	chr20:63738996	C/T	Crohns disease	EFO_0000384	IBDGC	26192919	European	2015	0.1595	0.0254	3.28e-10	+	20883	7	log OR	IBDGC_Chrons-Disease_EUR_2015
rs1056441	rs1056441	chr20:62370349	chr20:63738996	C/T	Crohns disease	EFO_0000384	IBDGC	26192919	European	2015	0.1665	0.0265	3.44e-10	+	20883	7	log OR	IBDGC_Chrons-Disease_EUR_2015
rs1056441	rs1056441	chr20:62370349	chr20:63738996	C/T	Trunk fat percentage	-	Neale B	UKBB	European	2017	0.01483	0.002363	3.49e-10	+	331113	1	IVNT	Neale-B_UKBB_EUR_2017
rs1056441	rs1056441	chr20:62370349	chr20:63738996	C/T	Forced vital capacity, best measure	EFO_0004312	Neale B	UKBB	European	2017	-0.01496	0.002386	3.62e-10	-	255492	1	IVNT	Neale-B_UKBB_EUR_2017
rs1056441	rs1056441	chr20:62370349	chr20:63738996	C/T	Crohns disease	EFO_0000384	IBDGC	26192919	European	2015	0.1596	0.0255	3.66e-10	+	20883	7	log OR	IBDGC_Chrons-Disease_EUR_2015
rs1056441	rs1056441	chr20:62370349	chr20:63738996	C/T	Body fat percentage	EFO_0007800	Neale B	UKBB	European	2017	0.01233	0.00197	3.83e-10	+	331117	1	IVNT	Neale-B_UKBB_EUR_2017
rs1056441	rs1056441	chr20:62370349	chr20:63738996	C/T	Forced expiratory volume in 1-second	EFO_0004314	Neale B	UKBB	European	2017	-0.01377	0.002201	3.99e-10	-	307638	1	IVNT	Neale-B_UKBB_EUR_2017
rs1056441	rs1056441	chr20:62370349	chr20:63738996	C/T	Leg fat percentage right	-	Neale B	UKBB	European	2017	0.01017	0.001628	4.31e-10	+	331296	1	IVNT	Neale-B_UKBB_EUR_2017
rs1056441	rs1056441	chr20:62370349	chr20:63738996	C/T	Leg fat mass left	-	Neale B	UKBB	European	2017	0.01276	0.002047	4.53e-10	+	331275	1	IVNT	Neale-B_UKBB_EUR_2017
rs1056441	rs1056441	chr20:62370349	chr20:63738996	C/T	Crohns disease	EFO_0000384	IBDGC	26192919	European	2015	0.1593	0.0256	4.56e-10	+	20883	7	log OR	IBDGC_Chrons-Disease_EUR_2015
rs1056441	rs1056441	chr20:62370349	chr20:63738996	C/T	Leg fat percentage right	-	Neale B	UKBB	European	2017	0.01015	0.001628	4.58e-10	+	331296	1	IVNT	Neale-B_UKBB_EUR_2017
rs1056441	rs1056441	chr20:62370349	chr20:63738996	C/T	Whole body fat mass	-	Neale B	UKBB	European	2017	0.01563	0.002509	4.65e-10	+	330762	1	IVNT	Neale-B_UKBB_EUR_2017
rs1056441	rs1056441	chr20:62370349	chr20:63738996	C/T	Leg fat percentage right	-	Neale B	UKBB	European	2017	0.01014	0.001628	4.71e-10	+	331296	1	IVNT	Neale-B_UKBB_EUR_2017
rs1056441	rs1056441	chr20:62370349	chr20:63738996	C/T	Whole body fat mass	-	Neale B	UKBB	European	2017	0.01562	0.002509	4.73e-10	+	330762	1	IVNT	Neale-B_UKBB_EUR_2017
rs1056441	rs1056441	chr20:62370349	chr20:63738996	C/T	Leg fat mass left	-	Neale B	UKBB	European	2017	0.01273	0.002045	4.8e-10	+	331275	1	IVNT	Neale-B_UKBB_EUR_2017
rs1056441	rs1056441	chr20:62370349	chr20:63738996	C/T	Whole body fat mass	-	Neale B	UKBB	European	2017	0.01561	0.002508	4.86e-10	+	330762	1	IVNT	Neale-B_UKBB_EUR_2017
rs1056441	rs1056441	chr20:62370349	chr20:63738996	C/T	Whole body fat mass	-	Neale B	UKBB	European	2017	0.01561	0.002508	4.91e-10	+	330762	1	IVNT	Neale-B_UKBB_EUR_2017
rs1056441	rs1056441	chr20:62370349	chr20:63738996	C/T	Trunk fat mass	EFO_0005409	Neale B	UKBB	European	2017	0.01609	0.002589	5.1e-10	+	331093	1	IVNT	Neale-B_UKBB_EUR_2017
rs1056441	rs1056441	chr20:62370349	chr20:63738996	C/T	Trunk fat mass	EFO_0005409	Neale B	UKBB	European	2017	0.01608	0.002589	5.31e-10	+	331093	1	IVNT	Neale-B_UKBB_EUR_2017
rs1056441	rs1056441	chr20:62370349	chr20:63738996	C/T	Whole body fat mass	-	Neale B	UKBB	European	2017	0.01559	0.002512	5.47e-10	+	330762	1	IVNT	Neale-B_UKBB_EUR_2017
rs1056441	rs1056441	chr20:62370349	chr20:63738996	C/T	Leg fat percentage right	-	Neale B	UKBB	European	2017	0.01009	0.001628	5.84e-10	+	331296	1	IVNT	Neale-B_UKBB_EUR_2017
rs1056441	rs1056441	chr20:62370349	chr20:63738996	C/T	Trunk fat mass	EFO_0005409	Neale B	UKBB	European	2017	0.01603	0.002588	5.92e-10	+	331093	1	IVNT	Neale-B_UKBB_EUR_2017
rs1056441	rs1056441	chr20:62370349	chr20:63738996	C/T	Leg fat mass left	-	Neale B	UKBB	European	2017	0.01265	0.002043	5.94e-10	+	331275	1	IVNT	Neale-B_UKBB_EUR_2017
rs1056441	rs1056441	chr20:62370349	chr20:63738996	C/T	Forced expiratory volume in 1-second, best measure	EFO_0004314	Neale B	UKBB	European	2017	-0.01498	0.002419	5.97e-10	-	255492	1	IVNT	Neale-B_UKBB_EUR_2017
rs1056441	rs1056441	chr20:62370349	chr20:63738996	C/T	Forced expiratory volume in 1-second, best measure	EFO_0004314	Neale B	UKBB	European	2017	-0.01498	0.002419	5.98e-10	-	255492	1	IVNT	Neale-B_UKBB_EUR_2017
rs1056441	rs1056441	chr20:62370349	chr20:63738996	C/T	Trunk fat mass	EFO_0005409	Neale B	UKBB	European	2017	0.01602	0.002588	5.99e-10	+	331093	1	IVNT	Neale-B_UKBB_EUR_2017
rs1056441	rs1056441	chr20:62370349	chr20:63738996	C/T	Whole body fat mass	-	Neale B	UKBB	European	2017	0.01551	0.002508	6.22e-10	+	330762	1	IVNT	Neale-B_UKBB_EUR_2017
rs1056441	rs1056441	chr20:62370349	chr20:63738996	C/T	Leg fat mass left	-	Neale B	UKBB	European	2017	0.01263	0.002044	6.46e-10	+	331275	1	IVNT	Neale-B_UKBB_EUR_2017
rs1056441	rs1056441	chr20:62370349	chr20:63738996	C/T	Forced expiratory volume in 1-second, best measure	EFO_0004314	Neale B	UKBB	European	2017	-0.01495	0.00242	6.55e-10	-	255492	1	IVNT	Neale-B_UKBB_EUR_2017
rs1056441	rs1056441	chr20:62370349	chr20:63738996	C/T	Leg fat percentage right	-	Neale B	UKBB	European	2017	0.01007	0.001631	6.56e-10	+	331296	1	IVNT	Neale-B_UKBB_EUR_2017
rs1056441	rs1056441	chr20:62370349	chr20:63738996	C/T	Leg fat mass left	-	Neale B	UKBB	European	2017	0.01262	0.002043	6.57e-10	+	331275	1	IVNT	Neale-B_UKBB_EUR_2017
rs1056441	rs1056441	chr20:62370349	chr20:63738996	C/T	Forced expiratory volume in 1-second, best measure	EFO_0004314	Neale B	UKBB	European	2017	-0.01494	0.002419	6.61e-10	-	255492	1	IVNT	Neale-B_UKBB_EUR_2017
rs1056441	rs1056441	chr20:62370349	chr20:63738996	C/T	Leg fat mass left	-	Neale B	UKBB	European	2017	0.01262	0.002044	6.72e-10	+	331275	1	IVNT	Neale-B_UKBB_EUR_2017
rs1056441	rs1056441	chr20:62370349	chr20:63738996	C/T	Leg fat mass left	-	Neale B	UKBB	European	2017	0.01261	0.002043	6.75e-10	+	331275	1	IVNT	Neale-B_UKBB_EUR_2017
rs1056441	rs1056441	chr20:62370349	chr20:63738996	C/T	Leg fat mass left	-	Neale B	UKBB	European	2017	0.0126	0.002043	6.82e-10	+	331275	1	IVNT	Neale-B_UKBB_EUR_2017
rs1056441	rs1056441	chr20:62370349	chr20:63738996	C/T	Leg fat percentage right	-	Neale B	UKBB	European	2017	0.01004	0.001628	6.84e-10	+	331296	1	IVNT	Neale-B_UKBB_EUR_2017
rs1056441	rs1056441	chr20:62370349	chr20:63738996	C/T	Leg fat mass left	-	Neale B	UKBB	European	2017	0.0126	0.002043	6.91e-10	+	331275	1	IVNT	Neale-B_UKBB_EUR_2017
rs1056441	rs1056441	chr20:62370349	chr20:63738996	C/T	Trunk fat mass	EFO_0005409	Neale B	UKBB	European	2017	0.01598	0.002593	7.14e-10	+	331093	1	IVNT	Neale-B_UKBB_EUR_2017
rs1056441	rs1056441	chr20:62370349	chr20:63738996	C/T	Leg fat mass left	-	Neale B	UKBB	European	2017	0.01259	0.002043	7.15e-10	+	331275	1	IVNT	Neale-B_UKBB_EUR_2017
rs1056441	rs1056441	chr20:62370349	chr20:63738996	C/T	Wheeze or whistling in the chest in last year	EFO_0009715	Neale B	UKBB	European	2017	0.006483	0.001053	7.3e-10	+	331257	1	risk diff	Neale-B_UKBB_EUR_2017
rs1056441	rs1056441	chr20:62370349	chr20:63738996	C/T	Crohns disease	EFO_0000384	IBDGC	26192919	European	2015	0.156	0.0253	7.38e-10	+	20883	7	log OR	IBDGC_Chrons-Disease_EUR_2015
rs1056441	rs1056441	chr20:62370349	chr20:63738996	C/T	Forced expiratory volume in 1-second, best measure	EFO_0004314	Neale B	UKBB	European	2017	-0.0149	0.00242	7.41e-10	-	255492	1	IVNT	Neale-B_UKBB_EUR_2017
rs1056441	rs1056441	chr20:62370349	chr20:63738996	C/T	Body fat percentage	EFO_0007800	Neale B	UKBB	European	2017	0.01213	0.001971	7.67e-10	+	331117	1	IVNT	Neale-B_UKBB_EUR_2017
rs1056441	rs1056441	chr20:62370349	chr20:63738996	C/T	Forced expiratory volume in 1-second, best measure	EFO_0004314	Neale B	UKBB	European	2017	-0.01496	0.002432	7.74e-10	-	255492	1	IVNT	Neale-B_UKBB_EUR_2017
rs1056441	rs1056441	chr20:62370349	chr20:63738996	C/T	Lymphocyte percentage of white cells	EFO_0004586	Astle W	27863252	European	2016	-0.02319	0.003771	7.75e-10	-	173480	2	IVNT	Astle-W_Blood-Cell-Traits_EUR_2016
rs1056441	rs1056441	chr20:62370349	chr20:63738996	C/T	Trunk fat mass	EFO_0005409	Neale B	UKBB	European	2017	0.01591	0.002588	7.98e-10	+	331093	1	IVNT	Neale-B_UKBB_EUR_2017
rs1056441	rs1056441	chr20:62370349	chr20:63738996	C/T	Forced expiratory volume in 1-second, best measure	EFO_0004314	Neale B	UKBB	European	2017	-0.01494	0.002432	8.02e-10	-	255492	1	IVNT	Neale-B_UKBB_EUR_2017
rs1056441	rs1056441	chr20:62370349	chr20:63738996	C/T	Trunk fat percentage	-	Neale B	UKBB	European	2017	0.0145	0.002361	8.27e-10	+	331113	1	IVNT	Neale-B_UKBB_EUR_2017
rs1056441	rs1056441	chr20:62370349	chr20:63738996	C/T	Lymphocyte percentage of white cells	EFO_0004586	Astle W	27863252	European	2016	-0.02313	0.003768	8.31e-10	-	173480	2	IVNT	Astle-W_Blood-Cell-Traits_EUR_2016
rs1056441	rs1056441	chr20:62370349	chr20:63738996	C/T	Forced expiratory volume in 1-second, best measure	EFO_0004314	Neale B	UKBB	European	2017	-0.01493	0.002432	8.4e-10	-	255492	1	IVNT	Neale-B_UKBB_EUR_2017
rs1056441	rs1056441	chr20:62370349	chr20:63738996	C/T	Forced expiratory volume in 1-second, best measure	EFO_0004314	Neale B	UKBB	European	2017	-0.01487	0.002423	8.43e-10	-	255492	1	IVNT	Neale-B_UKBB_EUR_2017
rs1056441	rs1056441	chr20:62370349	chr20:63738996	C/T	Forced expiratory volume in 1-second, best measure	EFO_0004314	Neale B	UKBB	European	2017	-0.01492	0.002432	8.46e-10	-	255492	1	IVNT	Neale-B_UKBB_EUR_2017
rs1056441	rs1056441	chr20:62370349	chr20:63738996	C/T	Forced expiratory volume in 1-second, best measure	EFO_0004314	Neale B	UKBB	European	2017	-0.01492	0.002432	8.59e-10	-	255492	1	IVNT	Neale-B_UKBB_EUR_2017
rs1056441	rs1056441	chr20:62370349	chr20:63738996	C/T	Forced expiratory volume in 1-second, best measure	EFO_0004314	Neale B	UKBB	European	2017	-0.01492	0.002432	8.59e-10	-	255492	1	IVNT	Neale-B_UKBB_EUR_2017
rs1056441	rs1056441	chr20:62370349	chr20:63738996	C/T	Forced expiratory volume in 1-second, best measure	EFO_0004314	Neale B	UKBB	European	2017	-0.01493	0.002437	8.87e-10	-	255492	1	IVNT	Neale-B_UKBB_EUR_2017
rs1056441	rs1056441	chr20:62370349	chr20:63738996	C/T	Leg fat mass left	-	Neale B	UKBB	European	2017	0.01252	0.002043	8.89e-10	+	331275	1	IVNT	Neale-B_UKBB_EUR_2017
rs1056441	rs1056441	chr20:62370349	chr20:63738996	C/T	Leg fat mass left	-	Neale B	UKBB	European	2017	0.01252	0.002043	8.94e-10	+	331275	1	IVNT	Neale-B_UKBB_EUR_2017
rs1056441	rs1056441	chr20:62370349	chr20:63738996	C/T	Forced expiratory volume in 1-second, best measure	EFO_0004314	Neale B	UKBB	European	2017	-0.01488	0.002434	9.84e-10	-	255492	1	IVNT	Neale-B_UKBB_EUR_2017
rs1056441	rs1056441	chr20:62370349	chr20:63738996	C/T	Forced expiratory volume in 1-second, best measure	EFO_0004314	Neale B	UKBB	European	2017	-0.01486	0.002433	1e-09	-	255492	1	IVNT	Neale-B_UKBB_EUR_2017
rs1056441	rs1056441	chr20:62370349	chr20:63738996	C/T	Trunk fat percentage	-	Neale B	UKBB	European	2017	0.01441	0.002361	1.04e-09	+	331113	1	IVNT	Neale-B_UKBB_EUR_2017
rs1056441	rs1056441	chr20:62370349	chr20:63738996	C/T	Forced expiratory volume in 1-second, best measure	EFO_0004314	Neale B	UKBB	European	2017	-0.01483	0.002432	1.09e-09	-	255492	1	IVNT	Neale-B_UKBB_EUR_2017
rs1056441	rs1056441	chr20:62370349	chr20:63738996	C/T	Lymphocyte percentage of white cells	EFO_0004586	Astle W	27863252	European	2016	-0.0229	0.003767	1.21e-09	-	173480	2	IVNT	Astle-W_Blood-Cell-Traits_EUR_2016
rs1056441	rs1056441	chr20:62370349	chr20:63738996	C/T	Lymphocyte percentage of white cells	EFO_0004586	Astle W	27863252	European	2016	-0.02288	0.003768	1.27e-09	-	173480	2	IVNT	Astle-W_Blood-Cell-Traits_EUR_2016
rs1056441	rs1056441	chr20:62370349	chr20:63738996	C/T	Forced expiratory volume in 1-second, best measure	EFO_0004314	Neale B	UKBB	European	2017	-0.01476	0.002435	1.33e-09	-	255492	1	IVNT	Neale-B_UKBB_EUR_2017
rs1056441	rs1056441	chr20:62370349	chr20:63738996	C/T	Leg fat percentage right	-	Neale B	UKBB	European	2017	0.009856	0.001627	1.38e-09	+	331296	1	IVNT	Neale-B_UKBB_EUR_2017
rs1056441	rs1056441	chr20:62370349	chr20:63738996	C/T	Wheeze or whistling in the chest in last year	EFO_0009715	Neale B	UKBB	European	2017	0.006377	0.001053	1.38e-09	+	331257	1	risk diff	Neale-B_UKBB_EUR_2017
rs1056441	rs1056441	chr20:62370349	chr20:63738996	C/T	Forced expiratory volume in 1-second, best measure	EFO_0004314	Neale B	UKBB	European	2017	-0.01474	0.002434	1.39e-09	-	255492	1	IVNT	Neale-B_UKBB_EUR_2017
rs1056441	rs1056441	chr20:62370349	chr20:63738996	C/T	Lymphocyte percentage of white cells	EFO_0004586	Astle W	27863252	European	2016	-0.02278	0.003768	1.49e-09	-	173480	2	IVNT	Astle-W_Blood-Cell-Traits_EUR_2016
rs1056441	rs1056441	chr20:62370349	chr20:63738996	C/T	Lymphocyte percentage of white cells	EFO_0004586	Astle W	27863252	European	2016	-0.02288	0.003789	1.55e-09	-	173480	2	IVNT	Astle-W_Blood-Cell-Traits_EUR_2016
rs1056441	rs1056441	chr20:62370349	chr20:63738996	C/T	Self-reported eczema or dermatitis	EFO_0000274	Neale B	UKBB	European	2017	0.002472	0.0004101	1.67e-09	+	337159	1	risk diff	Neale-B_UKBB_EUR_2017
rs1056441	rs1056441	chr20:62370349	chr20:63738996	C/T	Lymphocyte percentage of white cells	EFO_0004586	Astle W	27863252	European	2016	-0.02281	0.003791	1.78e-09	-	173480	2	IVNT	Astle-W_Blood-Cell-Traits_EUR_2016
rs1056441	rs1056441	chr20:62370349	chr20:63738996	C/T	Lymphocyte percentage of white cells	EFO_0004586	Astle W	27863252	European	2016	-0.02287	0.003804	1.84e-09	-	173480	2	IVNT	Astle-W_Blood-Cell-Traits_EUR_2016
rs1056441	rs1056441	chr20:62370349	chr20:63738996	C/T	Trunk fat percentage	-	Neale B	UKBB	European	2017	0.01421	0.002363	1.84e-09	+	331113	1	IVNT	Neale-B_UKBB_EUR_2017
rs1056441	rs1056441	chr20:62370349	chr20:63738996	C/T	Whole body fat mass	-	Neale B	UKBB	European	2017	0.01502	0.002507	2.07e-09	+	330762	1	IVNT	Neale-B_UKBB_EUR_2017
rs1056441	rs1056441	chr20:62370349	chr20:63738996	C/T	Lymphocyte percentage of white cells	EFO_0004586	Astle W	27863252	European	2016	-0.02256	0.003772	2.22e-09	-	173480	2	IVNT	Astle-W_Blood-Cell-Traits_EUR_2016
rs1056441	rs1056441	chr20:62370349	chr20:63738996	C/T	Lymphocyte percentage of white cells	EFO_0004586	Astle W	27863252	European	2016	-0.02263	0.003789	2.34e-09	-	173480	2	IVNT	Astle-W_Blood-Cell-Traits_EUR_2016
rs1056441	rs1056441	chr20:62370349	chr20:63738996	C/T	Leg fat percentage right	-	Neale B	UKBB	European	2017	0.009711	0.001627	2.4e-09	+	331296	1	IVNT	Neale-B_UKBB_EUR_2017
rs1056441	rs1056441	chr20:62370349	chr20:63738996	C/T	Leg fat mass right	-	Neale B	UKBB	European	2017	0.01235	0.00207	2.42e-09	+	331293	1	IVNT	Neale-B_UKBB_EUR_2017
rs1056441	rs1056441	chr20:62370349	chr20:63738996	C/T	Leg fat mass right	-	Neale B	UKBB	European	2017	0.01234	0.002068	2.43e-09	+	331293	1	IVNT	Neale-B_UKBB_EUR_2017
rs1056441	rs1056441	chr20:62370349	chr20:63738996	C/T	Lymphocyte percentage of white cells	EFO_0004586	Astle W	27863252	European	2016	-0.02257	0.00379	2.61e-09	-	173480	2	IVNT	Astle-W_Blood-Cell-Traits_EUR_2016
rs1056441	rs1056441	chr20:62370349	chr20:63738996	C/T	Trunk fat mass	EFO_0005409	Neale B	UKBB	European	2017	0.0154	0.002587	2.65e-09	+	331093	1	IVNT	Neale-B_UKBB_EUR_2017
rs1056441	rs1056441	chr20:62370349	chr20:63738996	C/T	Whole body fat mass	-	Neale B	UKBB	European	2017	0.01491	0.002507	2.69e-09	+	330762	1	IVNT	Neale-B_UKBB_EUR_2017
rs1056441	rs1056441	chr20:62370349	chr20:63738996	C/T	Leg fat mass right	-	Neale B	UKBB	European	2017	0.01226	0.002066	2.94e-09	+	331293	1	IVNT	Neale-B_UKBB_EUR_2017
rs1056441	rs1056441	chr20:62370349	chr20:63738996	C/T	Leg fat mass right	-	Neale B	UKBB	European	2017	0.01226	0.002067	3e-09	+	331293	1	IVNT	Neale-B_UKBB_EUR_2017
rs1056441	rs1056441	chr20:62370349	chr20:63738996	C/T	Self-reported eczema or dermatitis	EFO_0000274	Neale B	UKBB	European	2017	0.002428	0.0004094	3.04e-09	+	337159	1	risk diff	Neale-B_UKBB_EUR_2017
rs1056441	rs1056441	chr20:62370349	chr20:63738996	C/T	Self-reported eczema or dermatitis	EFO_0000274	Neale B	UKBB	European	2017	0.002428	0.0004094	3.04e-09	+	337159	1	risk diff	Neale-B_UKBB_EUR_2017
rs1056441	rs1056441	chr20:62370349	chr20:63738996	C/T	Lymphocyte percentage of white cells	EFO_0004586	Astle W	27863252	European	2016	-0.02246	0.003789	3.06e-09	-	173480	2	IVNT	Astle-W_Blood-Cell-Traits_EUR_2016
rs1056441	rs1056441	chr20:62370349	chr20:63738996	C/T	Leg fat percentage right	-	Neale B	UKBB	European	2017	0.009649	0.001629	3.13e-09	+	331296	1	IVNT	Neale-B_UKBB_EUR_2017
rs1056441	rs1056441	chr20:62370349	chr20:63738996	C/T	Self-reported eczema or dermatitis	EFO_0000274	Neale B	UKBB	European	2017	0.002425	0.0004094	3.14e-09	+	337159	1	risk diff	Neale-B_UKBB_EUR_2017
rs1056441	rs1056441	chr20:62370349	chr20:63738996	C/T	Leg fat mass right	-	Neale B	UKBB	European	2017	0.01224	0.002066	3.19e-09	+	331293	1	IVNT	Neale-B_UKBB_EUR_2017
rs1056441	rs1056441	chr20:62370349	chr20:63738996	C/T	Forced expiratory volume in 1-second, best measure	EFO_0004314	Neale B	UKBB	European	2017	-0.01431	0.002417	3.25e-09	-	255492	1	IVNT	Neale-B_UKBB_EUR_2017
rs1056441	rs1056441	chr20:62370349	chr20:63738996	C/T	Leg fat percentage left	-	Neale B	UKBB	European	2017	0.009911	0.001675	3.26e-09	+	331278	1	IVNT	Neale-B_UKBB_EUR_2017
rs1056441	rs1056441	chr20:62370349	chr20:63738996	C/T	Lymphocyte percentage of white cells	EFO_0004586	Astle W	27863252	European	2016	-0.02243	0.00379	3.27e-09	-	173480	2	IVNT	Astle-W_Blood-Cell-Traits_EUR_2016
rs1056441	rs1056441	chr20:62370349	chr20:63738996	C/T	Leg fat mass right	-	Neale B	UKBB	European	2017	0.01223	0.002066	3.28e-09	+	331293	1	IVNT	Neale-B_UKBB_EUR_2017
rs1056441	rs1056441	chr20:62370349	chr20:63738996	C/T	Leg fat mass right	-	Neale B	UKBB	European	2017	0.01222	0.002066	3.33e-09	+	331293	1	IVNT	Neale-B_UKBB_EUR_2017
rs1056441	rs1056441	chr20:62370349	chr20:63738996	C/T	Self-reported eczema or dermatitis	EFO_0000274	Neale B	UKBB	European	2017	0.002422	0.0004095	3.34e-09	+	337159	1	risk diff	Neale-B_UKBB_EUR_2017
rs1056441	rs1056441	chr20:62370349	chr20:63738996	C/T	Lymphocyte percentage of white cells	EFO_0004586	Astle W	27863252	European	2016	-0.02243	0.003795	3.4e-09	-	173480	2	IVNT	Astle-W_Blood-Cell-Traits_EUR_2016
rs1056441	rs1056441	chr20:62370349	chr20:63738996	C/T	Leg fat mass right	-	Neale B	UKBB	European	2017	0.01221	0.002066	3.4e-09	+	331293	1	IVNT	Neale-B_UKBB_EUR_2017
rs1056441	rs1056441	chr20:62370349	chr20:63738996	C/T	Lymphocyte percentage of white cells	EFO_0004586	Astle W	27863252	European	2016	-0.02241	0.003791	3.41e-09	-	173480	2	IVNT	Astle-W_Blood-Cell-Traits_EUR_2016
rs1056441	rs1056441	chr20:62370349	chr20:63738996	C/T	Lymphocyte percentage of white cells	EFO_0004586	Astle W	27863252	European	2016	-0.0224	0.00379	3.42e-09	-	173480	2	IVNT	Astle-W_Blood-Cell-Traits_EUR_2016
rs1056441	rs1056441	chr20:62370349	chr20:63738996	C/T	Trunk fat mass	EFO_0005409	Neale B	UKBB	European	2017	0.01529	0.002587	3.43e-09	+	331093	1	IVNT	Neale-B_UKBB_EUR_2017
rs1056441	rs1056441	chr20:62370349	chr20:63738996	C/T	Leg fat mass right	-	Neale B	UKBB	European	2017	0.01221	0.002066	3.45e-09	+	331293	1	IVNT	Neale-B_UKBB_EUR_2017
rs1056441	rs1056441	chr20:62370349	chr20:63738996	C/T	Leg fat mass right	-	Neale B	UKBB	European	2017	0.01222	0.002068	3.45e-09	+	331293	1	IVNT	Neale-B_UKBB_EUR_2017
rs1056441	rs1056441	chr20:62370349	chr20:63738996	C/T	Lymphocyte percentage of white cells	EFO_0004586	Astle W	27863252	European	2016	-0.02227	0.003775	3.62e-09	-	173480	2	IVNT	Astle-W_Blood-Cell-Traits_EUR_2016
rs1056441	rs1056441	chr20:62370349	chr20:63738996	C/T	Lymphocyte percentage of white cells	EFO_0004586	Astle W	27863252	European	2016	-0.02236	0.003791	3.71e-09	-	173480	2	IVNT	Astle-W_Blood-Cell-Traits_EUR_2016
rs1056441	rs1056441	chr20:62370349	chr20:63738996	C/T	Self-reported eczema or dermatitis	EFO_0000274	Neale B	UKBB	European	2017	0.002415	0.0004095	3.71e-09	+	337159	1	risk diff	Neale-B_UKBB_EUR_2017
rs1056441	rs1056441	chr20:62370349	chr20:63738996	C/T	Lymphocyte percentage of white cells	EFO_0004586	Astle W	27863252	European	2016	-0.02234	0.003791	3.81e-09	-	173480	2	IVNT	Astle-W_Blood-Cell-Traits_EUR_2016
rs1056441	rs1056441	chr20:62370349	chr20:63738996	C/T	Self-reported eczema or dermatitis	EFO_0000274	Neale B	UKBB	European	2017	0.00241	0.0004095	3.98e-09	+	337159	1	risk diff	Neale-B_UKBB_EUR_2017
rs1056441	rs1056441	chr20:62370349	chr20:63738996	C/T	Inflammatory bowel disease	EFO_0003767	IBDGC	26192919	European	2015	0.1157	0.0197	4.06e-09	+	34652	15	log OR	IBDGC_IBD_EUR_2015
rs1056441	rs1056441	chr20:62370349	chr20:63738996	C/T	Leg fat mass right	-	Neale B	UKBB	European	2017	0.01215	0.002067	4.16e-09	+	331293	1	IVNT	Neale-B_UKBB_EUR_2017
rs1056441	rs1056441	chr20:62370349	chr20:63738996	C/T	Leg fat mass right	-	Neale B	UKBB	European	2017	0.01214	0.002067	4.2e-09	+	331293	1	IVNT	Neale-B_UKBB_EUR_2017
rs1056441	rs1056441	chr20:62370349	chr20:63738996	C/T	Whole body fat mass	-	Neale B	UKBB	European	2017	0.0147	0.002509	4.62e-09	+	330762	1	IVNT	Neale-B_UKBB_EUR_2017
rs1056441	rs1056441	chr20:62370349	chr20:63738996	C/T	Lymphocyte percentage of white cells	EFO_0004586	Astle W	27863252	European	2016	-0.02219	0.003795	5.03e-09	-	173480	2	IVNT	Astle-W_Blood-Cell-Traits_EUR_2016
rs1056441	rs1056441	chr20:62370349	chr20:63738996	C/T	Forced expiratory volume in 1-second, best measure	EFO_0004314	Neale B	UKBB	European	2017	-0.01411	0.002417	5.24e-09	-	255492	1	IVNT	Neale-B_UKBB_EUR_2017
rs1056441	rs1056441	chr20:62370349	chr20:63738996	C/T	Self-reported eczema or dermatitis	EFO_0000274	Neale B	UKBB	European	2017	0.002388	0.0004092	5.32e-09	+	337159	1	risk diff	Neale-B_UKBB_EUR_2017
rs1056441	rs1056441	chr20:62370349	chr20:63738996	C/T	Trunk fat mass	EFO_0005409	Neale B	UKBB	European	2017	0.0151	0.002589	5.52e-09	+	331093	1	IVNT	Neale-B_UKBB_EUR_2017
rs1056441	rs1056441	chr20:62370349	chr20:63738996	C/T	Self-reported eczema or dermatitis	EFO_0000274	Neale B	UKBB	European	2017	0.002384	0.0004092	5.67e-09	+	337159	1	risk diff	Neale-B_UKBB_EUR_2017
rs1056441	rs1056441	chr20:62370349	chr20:63738996	C/T	Lymphocyte percentage of white cells	EFO_0004586	Astle W	27863252	European	2016	-0.02187	0.00377	6.58e-09	-	173480	2	IVNT	Astle-W_Blood-Cell-Traits_EUR_2016
rs1056441	rs1056441	chr20:62370349	chr20:63738996	C/T	Wheeze or whistling in the chest in last year	EFO_0009715	Neale B	UKBB	European	2017	0.006109	0.001053	6.69e-09	+	331257	1	risk diff	Neale-B_UKBB_EUR_2017
rs1056441	rs1056441	chr20:62370349	chr20:63738996	C/T	Leg fat mass left	-	Neale B	UKBB	European	2017	0.01174	0.002032	7.57e-09	+	331275	1	IVNT	Neale-B_UKBB_EUR_2017
rs1056441	rs1056441	chr20:62370349	chr20:63738996	C/T	Leg fat mass left	-	Neale B	UKBB	European	2017	0.01174	0.002032	7.69e-09	+	331275	1	IVNT	Neale-B_UKBB_EUR_2017
rs1056441	rs1056441	chr20:62370349	chr20:63738996	C/T	Leg fat mass left	-	Neale B	UKBB	European	2017	0.01173	0.002032	7.85e-09	+	331275	1	IVNT	Neale-B_UKBB_EUR_2017
rs1056441	rs1056441	chr20:62370349	chr20:63738996	C/T	Wheeze or whistling in the chest in last year	EFO_0009715	Neale B	UKBB	European	2017	0.006119	0.001061	8.07e-09	+	331257	1	risk diff	Neale-B_UKBB_EUR_2017
rs1056441	rs1056441	chr20:62370349	chr20:63738996	C/T	Wheeze or whistling in the chest in last year	EFO_0009715	Neale B	UKBB	European	2017	0.006109	0.00106	8.13e-09	+	331257	1	risk diff	Neale-B_UKBB_EUR_2017
rs1056441	rs1056441	chr20:62370349	chr20:63738996	C/T	Wheeze or whistling in the chest in last year	EFO_0009715	Neale B	UKBB	European	2017	0.006103	0.001059	8.27e-09	+	331257	1	risk diff	Neale-B_UKBB_EUR_2017
rs1056441	rs1056441	chr20:62370349	chr20:63738996	C/T	Wheeze or whistling in the chest in last year	EFO_0009715	Neale B	UKBB	European	2017	0.006098	0.00106	8.79e-09	+	331257	1	risk diff	Neale-B_UKBB_EUR_2017
rs1056441	rs1056441	chr20:62370349	chr20:63738996	C/T	Leg fat mass left	-	Neale B	UKBB	European	2017	0.01169	0.002032	8.85e-09	+	331275	1	IVNT	Neale-B_UKBB_EUR_2017
rs1056441	rs1056441	chr20:62370349	chr20:63738996	C/T	Hip circumference	EFO_0005093	Neale B	UKBB	European	2017	0.01474	0.002564	9.09e-09	+	336601	1	IVNT	Neale-B_UKBB_EUR_2017
rs1056441	rs1056441	chr20:62370349	chr20:63738996	C/T	Wheeze or whistling in the chest in last year	EFO_0009715	Neale B	UKBB	European	2017	0.006084	0.001059	9.15e-09	+	331257	1	risk diff	Neale-B_UKBB_EUR_2017
rs1056441	rs1056441	chr20:62370349	chr20:63738996	C/T	Wheeze or whistling in the chest in last year	EFO_0009715	Neale B	UKBB	European	2017	0.006061	0.001055	9.24e-09	+	331257	1	risk diff	Neale-B_UKBB_EUR_2017
rs1056441	rs1056441	chr20:62370349	chr20:63738996	C/T	Wheeze or whistling in the chest in last year	EFO_0009715	Neale B	UKBB	European	2017	0.006084	0.00106	9.42e-09	+	331257	1	risk diff	Neale-B_UKBB_EUR_2017
rs1056441	rs1056441	chr20:62370349	chr20:63738996	C/T	Leg fat mass left	-	Neale B	UKBB	European	2017	0.01168	0.002035	9.68e-09	+	331275	1	IVNT	Neale-B_UKBB_EUR_2017
rs1056441	rs1056441	chr20:62370349	chr20:63738996	C/T	Wheeze or whistling in the chest in last year	EFO_0009715	Neale B	UKBB	European	2017	0.006073	0.001059	9.77e-09	+	331257	1	risk diff	Neale-B_UKBB_EUR_2017
rs1056441	rs1056441	chr20:62370349	chr20:63738996	C/T	Wheeze or whistling in the chest in last year	EFO_0009715	Neale B	UKBB	European	2017	0.006071	0.001059	9.87e-09	+	331257	1	risk diff	Neale-B_UKBB_EUR_2017
rs1056441	rs1056441	chr20:62370349	chr20:63738996	C/T	Wheeze or whistling in the chest in last year	EFO_0009715	Neale B	UKBB	European	2017	0.006069	0.001059	9.99e-09	+	331257	1	risk diff	Neale-B_UKBB_EUR_2017
rs1056441	rs1056441	chr20:62370349	chr20:63738996	C/T	Ulcerative colitis	EFO_0000729	IBDGC	26192919	European	2015	0.07834	0.01367	1e-08	+	-	-	log OR	NHGRI-EBI_GWAS_Catalog
rs1056441	rs1056441	chr20:62370349	chr20:63738996	C/T	Wheeze or whistling in the chest in last year	EFO_0009715	Neale B	UKBB	European	2017	0.006067	0.001059	1.01e-08	+	331257	1	risk diff	Neale-B_UKBB_EUR_2017
rs1056441	rs1056441	chr20:62370349	chr20:63738996	C/T	Leg fat mass left	-	Neale B	UKBB	European	2017	0.01164	0.002032	1.02e-08	+	331275	1	IVNT	Neale-B_UKBB_EUR_2017
rs1056441	rs1056441	chr20:62370349	chr20:63738996	C/T	Wheeze or whistling in the chest in last year	EFO_0009715	Neale B	UKBB	European	2017	0.006061	0.001059	1.05e-08	+	331257	1	risk diff	Neale-B_UKBB_EUR_2017
rs1056441	rs1056441	chr20:62370349	chr20:63738996	C/T	Wheeze or whistling in the chest in last year	EFO_0009715	Neale B	UKBB	European	2017	0.006023	0.001053	1.08e-08	+	331257	1	risk diff	Neale-B_UKBB_EUR_2017
rs1056441	rs1056441	chr20:62370349	chr20:63738996	C/T	Wheeze or whistling in the chest in last year	EFO_0009715	Neale B	UKBB	European	2017	0.006052	0.001059	1.09e-08	+	331257	1	risk diff	Neale-B_UKBB_EUR_2017
rs1056441	rs1056441	chr20:62370349	chr20:63738996	C/T	Wheeze or whistling in the chest in last year	EFO_0009715	Neale B	UKBB	European	2017	0.006017	0.001054	1.12e-08	+	331257	1	risk diff	Neale-B_UKBB_EUR_2017
rs1056441	rs1056441	chr20:62370349	chr20:63738996	C/T	Hip circumference	EFO_0005093	Neale B	UKBB	European	2017	0.01462	0.002562	1.16e-08	+	336601	1	IVNT	Neale-B_UKBB_EUR_2017
rs1056441	rs1056441	chr20:62370349	chr20:63738996	C/T	Lymphocyte percentage of white cells	EFO_0004586	Astle W	27863252	European	2016	-0.02167	0.003799	1.17e-08	-	173480	2	IVNT	Astle-W_Blood-Cell-Traits_EUR_2016
rs1056441	rs1056441	chr20:62370349	chr20:63738996	C/T	Wheeze or whistling in the chest in last year	EFO_0009715	Neale B	UKBB	European	2017	0.006007	0.001054	1.18e-08	+	331257	1	risk diff	Neale-B_UKBB_EUR_2017
rs1056441	rs1056441	chr20:62370349	chr20:63738996	C/T	Wheeze or whistling in the chest in last year	EFO_0009715	Neale B	UKBB	European	2017	0.006005	0.001053	1.19e-08	+	331257	1	risk diff	Neale-B_UKBB_EUR_2017
rs1056441	rs1056441	chr20:62370349	chr20:63738996	C/T	Wheeze or whistling in the chest in last year	EFO_0009715	Neale B	UKBB	European	2017	0.006003	0.001053	1.2e-08	+	331257	1	risk diff	Neale-B_UKBB_EUR_2017
rs1056441	rs1056441	chr20:62370349	chr20:63738996	C/T	Self-reported eczema or dermatitis	EFO_0000274	Neale B	UKBB	European	2017	0.002344	0.000412	1.28e-08	+	337159	1	risk diff	Neale-B_UKBB_EUR_2017
rs1056441	rs1056441	chr20:62370349	chr20:63738996	C/T	Lymphocyte percentage of white cells	EFO_0004586	Astle W	27863252	European	2016	-0.02164	0.003808	1.32e-08	-	173480	2	IVNT	Astle-W_Blood-Cell-Traits_EUR_2016
rs1056441	rs1056441	chr20:62370349	chr20:63738996	C/T	Self-reported eczema or dermatitis	EFO_0000274	Neale B	UKBB	European	2017	0.00234	0.0004119	1.34e-08	+	337159	1	risk diff	Neale-B_UKBB_EUR_2017
rs1056441	rs1056441	chr20:62370349	chr20:63738996	C/T	Self-reported eczema or dermatitis	EFO_0000274	Neale B	UKBB	European	2017	0.00234	0.0004119	1.34e-08	+	337159	1	risk diff	Neale-B_UKBB_EUR_2017
rs1056441	rs1056441	chr20:62370349	chr20:63738996	C/T	Lymphocyte percentage of white cells	EFO_0004586	Astle W	27863252	European	2016	-0.0214	0.003768	1.36e-08	-	173480	2	IVNT	Astle-W_Blood-Cell-Traits_EUR_2016
rs1056441	rs1056441	chr20:62370349	chr20:63738996	C/T	Self-reported eczema or dermatitis	EFO_0000274	Neale B	UKBB	European	2017	0.002333	0.0004116	1.44e-08	+	337159	1	risk diff	Neale-B_UKBB_EUR_2017
rs1056441	rs1056441	chr20:62370349	chr20:63738996	C/T	Self-reported eczema or dermatitis	EFO_0000274	Neale B	UKBB	European	2017	0.002333	0.0004116	1.44e-08	+	337159	1	risk diff	Neale-B_UKBB_EUR_2017
rs1056441	rs1056441	chr20:62370349	chr20:63738996	C/T	Hip circumference	EFO_0005093	Neale B	UKBB	European	2017	0.01452	0.002562	1.45e-08	+	336601	1	IVNT	Neale-B_UKBB_EUR_2017
rs1056441	rs1056441	chr20:62370349	chr20:63738996	C/T	Ulcerative colitis	EFO_0000729	IBDGC	26192919	European	2015	0.1338	0.0236	1.46e-08	+	27432	8	log OR	IBDGC_Ulcerative-Colitis_EUR_2015
rs1056441	rs1056441	chr20:62370349	chr20:63738996	C/T	Hip circumference	EFO_0005093	Neale B	UKBB	European	2017	0.01449	0.00256	1.5e-08	+	336601	1	IVNT	Neale-B_UKBB_EUR_2017
rs1056441	rs1056441	chr20:62370349	chr20:63738996	C/T	Self-reported eczema or dermatitis	EFO_0000274	Neale B	UKBB	European	2017	0.00233	0.0004116	1.52e-08	+	337159	1	risk diff	Neale-B_UKBB_EUR_2017
rs1056441	rs1056441	chr20:62370349	chr20:63738996	C/T	Self-reported eczema or dermatitis	EFO_0000274	Neale B	UKBB	European	2017	0.002329	0.0004116	1.53e-08	+	337159	1	risk diff	Neale-B_UKBB_EUR_2017
rs1056441	rs1056441	chr20:62370349	chr20:63738996	C/T	Self-reported eczema or dermatitis	EFO_0000274	Neale B	UKBB	European	2017	0.002329	0.0004117	1.54e-08	+	337159	1	risk diff	Neale-B_UKBB_EUR_2017
rs1056441	rs1056441	chr20:62370349	chr20:63738996	C/T	Self-reported eczema or dermatitis	EFO_0000274	Neale B	UKBB	European	2017	0.002328	0.0004116	1.55e-08	+	337159	1	risk diff	Neale-B_UKBB_EUR_2017
rs1056441	rs1056441	chr20:62370349	chr20:63738996	C/T	Lymphocyte percentage of white cells	EFO_0004586	Astle W	27863252	European	2016	-0.0213	0.003766	1.55e-08	-	173480	2	IVNT	Astle-W_Blood-Cell-Traits_EUR_2016
rs1056441	rs1056441	chr20:62370349	chr20:63738996	C/T	Forced expiratory volume in 1-second, best measure	EFO_0004314	Neale B	UKBB	European	2017	-0.01366	0.00242	1.67e-08	-	255492	1	IVNT	Neale-B_UKBB_EUR_2017
rs1056441	rs1056441	chr20:62370349	chr20:63738996	C/T	Hip circumference	EFO_0005093	Neale B	UKBB	European	2017	0.01444	0.00256	1.7e-08	+	336601	1	IVNT	Neale-B_UKBB_EUR_2017
rs1056441	rs1056441	chr20:62370349	chr20:63738996	C/T	Hip circumference	EFO_0005093	Neale B	UKBB	European	2017	0.01443	0.00256	1.71e-08	+	336601	1	IVNT	Neale-B_UKBB_EUR_2017
rs1056441	rs1056441	chr20:62370349	chr20:63738996	C/T	Hip circumference	EFO_0005093	Neale B	UKBB	European	2017	0.01443	0.00256	1.73e-08	+	336601	1	IVNT	Neale-B_UKBB_EUR_2017
rs1056441	rs1056441	chr20:62370349	chr20:63738996	C/T	Hip circumference	EFO_0005093	Neale B	UKBB	European	2017	0.01442	0.00256	1.76e-08	+	336601	1	IVNT	Neale-B_UKBB_EUR_2017
rs1056441	rs1056441	chr20:62370349	chr20:63738996	C/T	Hip circumference	EFO_0005093	Neale B	UKBB	European	2017	0.01441	0.00256	1.79e-08	+	336601	1	IVNT	Neale-B_UKBB_EUR_2017
rs1056441	rs1056441	chr20:62370349	chr20:63738996	C/T	Self-reported eczema or dermatitis	EFO_0000274	Neale B	UKBB	European	2017	0.002318	0.0004116	1.79e-08	+	337159	1	risk diff	Neale-B_UKBB_EUR_2017
rs1056441	rs1056441	chr20:62370349	chr20:63738996	C/T	Hip circumference	EFO_0005093	Neale B	UKBB	European	2017	0.01442	0.002561	1.79e-08	+	336601	1	IVNT	Neale-B_UKBB_EUR_2017
rs1056441	rs1056441	chr20:62370349	chr20:63738996	C/T	Self-reported eczema or dermatitis	EFO_0000274	Neale B	UKBB	European	2017	0.002317	0.0004117	1.82e-08	+	337159	1	risk diff	Neale-B_UKBB_EUR_2017
rs1056441	rs1056441	chr20:62370349	chr20:63738996	C/T	Hip circumference	EFO_0005093	Neale B	UKBB	European	2017	0.0144	0.00256	1.87e-08	+	336601	1	IVNT	Neale-B_UKBB_EUR_2017
rs1056441	rs1056441	chr20:62370349	chr20:63738996	C/T	Crohns disease	EFO_0000384	IBDGC	26192919	European	2015	0.1519	0.027	1.9e-08	+	20883	7	log OR	IBDGC_Chrons-Disease_EUR_2015
rs1056441	rs1056441	chr20:62370349	chr20:63738996	C/T	Self-reported eczema or dermatitis	EFO_0000274	Neale B	UKBB	European	2017	0.002314	0.0004124	2.01e-08	+	337159	1	risk diff	Neale-B_UKBB_EUR_2017
rs1056441	rs1056441	chr20:62370349	chr20:63738996	C/T	No blood clot, bronchitis, emphysema, asthma, rhinitis, eczema or allergy diagnosed by doctor	-	Neale B	UKBB	European	2017	-0.006736	0.001204	2.24e-08	-	336782	1	risk diff	Neale-B_UKBB_EUR_2017
rs1056441	rs1056441	chr20:62370349	chr20:63738996	C/T	Waist circumference	EFO_0004342	Neale B	UKBB	European	2017	0.01281	0.002293	2.35e-08	+	336639	1	IVNT	Neale-B_UKBB_EUR_2017
rs1056441	rs1056441	chr20:62370349	chr20:63738996	C/T	Leg fat mass left	-	Neale B	UKBB	European	2017	0.01134	0.002031	2.35e-08	+	331275	1	IVNT	Neale-B_UKBB_EUR_2017
rs1056441	rs1056441	chr20:62370349	chr20:63738996	C/T	Waist circumference	EFO_0004342	Neale B	UKBB	European	2017	0.01278	0.002291	2.46e-08	+	336639	1	IVNT	Neale-B_UKBB_EUR_2017
rs1056441	rs1056441	chr20:62370349	chr20:63738996	C/T	Hip circumference	EFO_0005093	Neale B	UKBB	European	2017	0.01427	0.00256	2.48e-08	+	336601	1	IVNT	Neale-B_UKBB_EUR_2017
rs1056441	rs1056441	chr20:62370349	chr20:63738996	C/T	No blood clot, bronchitis, emphysema, asthma, rhinitis, eczema or allergy diagnosed by doctor	-	Neale B	UKBB	European	2017	-0.006689	0.001203	2.73e-08	-	336782	1	risk diff	Neale-B_UKBB_EUR_2017
rs1056441	rs1056441	chr20:62370349	chr20:63738996	C/T	Leg fat mass left	-	Neale B	UKBB	European	2017	0.01125	0.002031	3.06e-08	+	331275	1	IVNT	Neale-B_UKBB_EUR_2017
rs1056441	rs1056441	chr20:62370349	chr20:63738996	C/T	No blood clot, bronchitis, emphysema, asthma, rhinitis, eczema or allergy diagnosed by doctor	-	Neale B	UKBB	European	2017	-0.006653	0.001203	3.24e-08	-	336782	1	risk diff	Neale-B_UKBB_EUR_2017
rs1056441	rs1056441	chr20:62370349	chr20:63738996	C/T	No blood clot, bronchitis, emphysema, asthma, rhinitis, eczema or allergy diagnosed by doctor	-	Neale B	UKBB	European	2017	-0.006668	0.001206	3.25e-08	-	336782	1	risk diff	Neale-B_UKBB_EUR_2017
rs1056441	rs1056441	chr20:62370349	chr20:63738996	C/T	Waist circumference	EFO_0004342	Neale B	UKBB	European	2017	0.01266	0.002291	3.3e-08	+	336639	1	IVNT	Neale-B_UKBB_EUR_2017
rs1056441	rs1056441	chr20:62370349	chr20:63738996	C/T	Arm fat mass right	-	Neale B	UKBB	European	2017	0.01401	0.002537	3.33e-08	+	331226	1	IVNT	Neale-B_UKBB_EUR_2017
rs1056441	rs1056441	chr20:62370349	chr20:63738996	C/T	Forced expiratory volume in 1-second	EFO_0004314	Neale B	UKBB	European	2017	-0.01265	0.002293	3.45e-08	-	307638	1	IVNT	Neale-B_UKBB_EUR_2017
rs1056441	rs1056441	chr20:62370349	chr20:63738996	C/T	Body fat percentage	EFO_0007800	Neale B	UKBB	European	2017	0.01131	0.002053	3.66e-08	+	331117	1	IVNT	Neale-B_UKBB_EUR_2017
rs1056441	rs1056441	chr20:62370349	chr20:63738996	C/T	Plateletcrit	EFO_0004586	Astle W	27863252	European	2016	0.02147	0.003903	3.74e-08	+	173480	2	IVNT	Astle-W_Blood-Cell-Traits_EUR_2016
rs1056441	rs1056441	chr20:62370349	chr20:63738996	C/T	Waist circumference	EFO_0004342	Neale B	UKBB	European	2017	0.01259	0.002289	3.77e-08	+	336639	1	IVNT	Neale-B_UKBB_EUR_2017
rs1056441	rs1056441	chr20:62370349	chr20:63738996	C/T	Leg fat mass right	-	Neale B	UKBB	European	2017	0.0113	0.002055	3.87e-08	+	331293	1	IVNT	Neale-B_UKBB_EUR_2017
rs1056441	rs1056441	chr20:62370349	chr20:63738996	C/T	Arm fat mass right	-	Neale B	UKBB	European	2017	0.01392	0.002532	3.88e-08	+	331226	1	IVNT	Neale-B_UKBB_EUR_2017
rs1056441	rs1056441	chr20:62370349	chr20:63738996	C/T	Leg fat mass right	-	Neale B	UKBB	European	2017	0.01129	0.002055	3.92e-08	+	331293	1	IVNT	Neale-B_UKBB_EUR_2017
rs1056441	rs1056441	chr20:62370349	chr20:63738996	C/T	Leg fat mass right	-	Neale B	UKBB	European	2017	0.01129	0.002056	3.95e-08	+	331293	1	IVNT	Neale-B_UKBB_EUR_2017
rs1056441	rs1056441	chr20:62370349	chr20:63738996	C/T	Arm fat mass right	-	Neale B	UKBB	European	2017	0.01392	0.002535	4.03e-08	+	331226	1	IVNT	Neale-B_UKBB_EUR_2017
rs1056441	rs1056441	chr20:62370349	chr20:63738996	C/T	Arm fat mass right	-	Neale B	UKBB	European	2017	0.01387	0.002532	4.3e-08	+	331226	1	IVNT	Neale-B_UKBB_EUR_2017
rs1056441	rs1056441	chr20:62370349	chr20:63738996	C/T	Arm fat mass right	-	Neale B	UKBB	European	2017	0.01387	0.002532	4.3e-08	+	331226	1	IVNT	Neale-B_UKBB_EUR_2017
rs1056441	rs1056441	chr20:62370349	chr20:63738996	C/T	Lymphocyte percentage of white cells	EFO_0004586	Astle W	27863252	European	2016	-0.02083	0.003802	4.3e-08	-	173480	2	IVNT	Astle-W_Blood-Cell-Traits_EUR_2016
rs1056441	rs1056441	chr20:62370349	chr20:63738996	C/T	Waist circumference	EFO_0004342	Neale B	UKBB	European	2017	0.01254	0.002289	4.36e-08	+	336639	1	IVNT	Neale-B_UKBB_EUR_2017
rs1056441	rs1056441	chr20:62370349	chr20:63738996	C/T	Plateletcrit	EFO_0004586	Astle W	27863252	European	2016	0.02117	0.003867	4.4e-08	+	173480	2	IVNT	Astle-W_Blood-Cell-Traits_EUR_2016
rs1056441	rs1056441	chr20:62370349	chr20:63738996	C/T	Waist circumference	EFO_0004342	Neale B	UKBB	European	2017	0.01253	0.002289	4.41e-08	+	336639	1	IVNT	Neale-B_UKBB_EUR_2017
rs1056441	rs1056441	chr20:62370349	chr20:63738996	C/T	Arm fat mass right	-	Neale B	UKBB	European	2017	0.01386	0.002532	4.43e-08	+	331226	1	IVNT	Neale-B_UKBB_EUR_2017
rs1056441	rs1056441	chr20:62370349	chr20:63738996	C/T	Waist circumference	EFO_0004342	Neale B	UKBB	European	2017	0.01253	0.002289	4.44e-08	+	336639	1	IVNT	Neale-B_UKBB_EUR_2017
rs1056441	rs1056441	chr20:62370349	chr20:63738996	C/T	Leg fat mass right	-	Neale B	UKBB	European	2017	0.01124	0.002056	4.57e-08	+	331293	1	IVNT	Neale-B_UKBB_EUR_2017
rs1056441	rs1056441	chr20:62370349	chr20:63738996	C/T	Waist circumference	EFO_0004342	Neale B	UKBB	European	2017	0.01252	0.002291	4.59e-08	+	336639	1	IVNT	Neale-B_UKBB_EUR_2017
rs1056441	rs1056441	chr20:62370349	chr20:63738996	C/T	Waist circumference	EFO_0004342	Neale B	UKBB	European	2017	0.01251	0.002289	4.61e-08	+	336639	1	IVNT	Neale-B_UKBB_EUR_2017
rs1056441	rs1056441	chr20:62370349	chr20:63738996	C/T	Leg fat mass right	-	Neale B	UKBB	European	2017	0.01125	0.002059	4.68e-08	+	331293	1	IVNT	Neale-B_UKBB_EUR_2017
rs1056441	rs1056441	chr20:62370349	chr20:63738996	C/T	Arm fat mass right	-	Neale B	UKBB	European	2017	0.01383	0.002532	4.72e-08	+	331226	1	IVNT	Neale-B_UKBB_EUR_2017
rs1056441	rs1056441	chr20:62370349	chr20:63738996	C/T	No blood clot, bronchitis, emphysema, asthma, rhinitis, eczema or allergy diagnosed by doctor	-	Neale B	UKBB	European	2017	-0.006577	0.001204	4.75e-08	-	336782	1	risk diff	Neale-B_UKBB_EUR_2017
rs1056441	rs1056441	chr20:62370349	chr20:63738996	C/T	Arm fat mass right	-	Neale B	UKBB	European	2017	0.01383	0.002534	4.77e-08	+	331226	1	IVNT	Neale-B_UKBB_EUR_2017
rs1056441	rs1056441	chr20:62370349	chr20:63738996	C/T	No blood clot, bronchitis, emphysema, asthma, rhinitis, eczema or allergy diagnosed by doctor	-	Neale B	UKBB	European	2017	-0.006571	0.001204	4.84e-08	-	336782	1	risk diff	Neale-B_UKBB_EUR_2017
rs1056441	rs1056441	chr20:62370349	chr20:63738996	C/T	Waist circumference	EFO_0004342	Neale B	UKBB	European	2017	0.01249	0.002289	4.86e-08	+	336639	1	IVNT	Neale-B_UKBB_EUR_2017
rs1056441	rs1056441	chr20:62370349	chr20:63738996	C/T	No blood clot, bronchitis, emphysema, asthma, rhinitis, eczema or allergy diagnosed by doctor	-	Neale B	UKBB	European	2017	-0.00657	0.001204	4.88e-08	-	336782	1	risk diff	Neale-B_UKBB_EUR_2017
rs1056441	rs1056441	chr20:62370349	chr20:63738996	C/T	Plateletcrit	EFO_0004586	Astle W	27863252	European	2016	0.02111	0.003871	4.89e-08	+	173480	2	IVNT	Astle-W_Blood-Cell-Traits_EUR_2016
rs1056441	rs1056441	chr20:62370349	chr20:63738996	C/T	Arm fat mass right	-	Neale B	UKBB	European	2017	0.01382	0.002534	4.91e-08	+	331226	1	IVNT	Neale-B_UKBB_EUR_2017
rs1056441	rs1056441	chr20:62370349	chr20:63738996	C/T	No blood clot, bronchitis, emphysema, asthma, rhinitis, eczema or allergy diagnosed by doctor	-	Neale B	UKBB	European	2017	-0.006567	0.001204	4.93e-08	-	336782	1	risk diff	Neale-B_UKBB_EUR_2017
rs1056441	rs1056441	chr20:62370349	chr20:63738996	C/T	Waist circumference	EFO_0004342	Neale B	UKBB	European	2017	0.01248	0.00229	4.99e-08	+	336639	1	IVNT	Neale-B_UKBB_EUR_2017
rs1056441	rs1056441	chr20:62370349	chr20:63738996	C/T	Arm fat mass right	-	Neale B	UKBB	European	2017	0.0138	0.002532	5.06e-08	+	331226	1	IVNT	Neale-B_UKBB_EUR_2017
rs1056441	rs1056441	chr20:62370349	chr20:63738996	C/T	Plateletcrit	EFO_0004586	Astle W	27863252	European	2016	0.02109	0.003871	5.06e-08	+	173480	2	IVNT	Astle-W_Blood-Cell-Traits_EUR_2016
rs1056441	rs1056441	chr20:62370349	chr20:63738996	C/T	Plateletcrit	EFO_0004586	Astle W	27863252	European	2016	0.02109	0.00387	5.06e-08	+	173480	2	IVNT	Astle-W_Blood-Cell-Traits_EUR_2016
rs1056441	rs1056441	chr20:62370349	chr20:63738996	C/T	Leg fat mass right	-	Neale B	UKBB	European	2017	0.0112	0.002055	5.08e-08	+	331293	1	IVNT	Neale-B_UKBB_EUR_2017
rs1056441	rs1056441	chr20:62370349	chr20:63738996	C/T	Ulcerative colitis	EFO_0000729	IBDGC	26192919	European	2015	0.1332	0.0245	5.17e-08	+	27432	8	log OR	IBDGC_Ulcerative-Colitis_EUR_2015
rs1056441	rs1056441	chr20:62370349	chr20:63738996	C/T	Waist circumference	EFO_0004342	Neale B	UKBB	European	2017	0.01246	0.002289	5.25e-08	+	336639	1	IVNT	Neale-B_UKBB_EUR_2017
rs1056441	rs1056441	chr20:62370349	chr20:63738996	C/T	Plateletcrit	EFO_0004586	Astle W	27863252	European	2016	0.02103	0.003868	5.43e-08	+	173480	2	IVNT	Astle-W_Blood-Cell-Traits_EUR_2016
rs1056441	rs1056441	chr20:62370349	chr20:63738996	C/T	Leg fat mass left	-	Neale B	UKBB	European	2017	0.01105	0.002032	5.48e-08	+	331275	1	IVNT	Neale-B_UKBB_EUR_2017
rs1056441	rs1056441	chr20:62370349	chr20:63738996	C/T	Plateletcrit	EFO_0004586	Astle W	27863252	European	2016	0.021	0.003867	5.57e-08	+	173480	2	IVNT	Astle-W_Blood-Cell-Traits_EUR_2016
rs1056441	rs1056441	chr20:62370349	chr20:63738996	C/T	Arm fat mass right	-	Neale B	UKBB	European	2017	0.01375	0.002533	5.68e-08	+	331226	1	IVNT	Neale-B_UKBB_EUR_2017
rs1056441	rs1056441	chr20:62370349	chr20:63738996	C/T	Plateletcrit	EFO_0004586	Astle W	27863252	European	2016	0.0211	0.00389	5.83e-08	+	173480	2	IVNT	Astle-W_Blood-Cell-Traits_EUR_2016
rs1056441	rs1056441	chr20:62370349	chr20:63738996	C/T	Plateletcrit	EFO_0004586	Astle W	27863252	European	2016	0.02097	0.003867	5.84e-08	+	173480	2	IVNT	Astle-W_Blood-Cell-Traits_EUR_2016
rs1056441	rs1056441	chr20:62370349	chr20:63738996	C/T	Arm fat mass right	-	Neale B	UKBB	European	2017	0.01373	0.002533	5.91e-08	+	331226	1	IVNT	Neale-B_UKBB_EUR_2017
rs1056441	rs1056441	chr20:62370349	chr20:63738996	C/T	Plateletcrit	EFO_0004586	Astle W	27863252	European	2016	0.02108	0.003889	5.94e-08	+	173480	2	IVNT	Astle-W_Blood-Cell-Traits_EUR_2016
rs1056441	rs1056441	chr20:62370349	chr20:63738996	C/T	No blood clot, bronchitis, emphysema, asthma, rhinitis, eczema or allergy diagnosed by doctor	-	Neale B	UKBB	European	2017	-0.006528	0.001204	5.96e-08	-	336782	1	risk diff	Neale-B_UKBB_EUR_2017
rs1056441	rs1056441	chr20:62370349	chr20:63738996	C/T	Plateletcrit	EFO_0004586	Astle W	27863252	European	2016	0.02105	0.003889	6.23e-08	+	173480	2	IVNT	Astle-W_Blood-Cell-Traits_EUR_2016
rs1056441	rs1056441	chr20:62370349	chr20:63738996	C/T	Pediatric Inflammatory Bowel Disease	-	Kugathasan S	18758464	European	2008	NA	NA	6.3e-08	NA	5261	-	-	GRASP
rs1056441	rs1056441	chr20:62370349	chr20:63738996	C/T	Leg fat percentage right	-	Neale B	UKBB	European	2017	0.009169	0.001696	6.48e-08	+	331296	1	IVNT	Neale-B_UKBB_EUR_2017
rs1056441	rs1056441	chr20:62370349	chr20:63738996	C/T	Plateletcrit	EFO_0004586	Astle W	27863252	European	2016	0.02104	0.003895	6.6e-08	+	173480	2	IVNT	Astle-W_Blood-Cell-Traits_EUR_2016
rs1056441	rs1056441	chr20:62370349	chr20:63738996	C/T	Ulcerative colitis	EFO_0000729	IBDGC	26192919	European	2015	0.1267	0.0235	6.63e-08	+	27432	8	log OR	IBDGC_Ulcerative-Colitis_EUR_2015
rs1056441	rs1056441	chr20:62370349	chr20:63738996	C/T	Plateletcrit	EFO_0004586	Astle W	27863252	European	2016	0.02101	0.003891	6.64e-08	+	173480	2	IVNT	Astle-W_Blood-Cell-Traits_EUR_2016
rs1056441	rs1056441	chr20:62370349	chr20:63738996	C/T	Pediatric Inflammatory Bowel Disease	-	Kugathasan S	18758464	European	2008	NA	NA	6.95e-08	NA	5261	-	-	GRASP
rs1056441	rs1056441	chr20:62370349	chr20:63738996	C/T	Current tobacco smoking	EFO_0006527	Neale B	UKBB	European	2017	0.007543	0.001399	7e-08	+	337030	1	-	Neale-B_UKBB_EUR_2017
rs1056441	rs1056441	chr20:62370349	chr20:63738996	C/T	Plateletcrit	EFO_0004586	Astle W	27863252	European	2016	0.02097	0.00389	7.02e-08	+	173480	2	IVNT	Astle-W_Blood-Cell-Traits_EUR_2016
rs1056441	rs1056441	chr20:62370349	chr20:63738996	C/T	Plateletcrit	EFO_0004586	Astle W	27863252	European	2016	0.02096	0.00389	7.07e-08	+	173480	2	IVNT	Astle-W_Blood-Cell-Traits_EUR_2016
rs1056441	rs1056441	chr20:62370349	chr20:63738996	C/T	Plateletcrit	EFO_0004586	Astle W	27863252	European	2016	0.02096	0.003889	7.08e-08	+	173480	2	IVNT	Astle-W_Blood-Cell-Traits_EUR_2016
rs1056441	rs1056441	chr20:62370349	chr20:63738996	C/T	Plateletcrit	EFO_0004586	Astle W	27863252	European	2016	0.02096	0.003891	7.22e-08	+	173480	2	IVNT	Astle-W_Blood-Cell-Traits_EUR_2016
rs1056441	rs1056441	chr20:62370349	chr20:63738996	C/T	Current tobacco smoking	EFO_0006527	Neale B	UKBB	European	2017	0.007531	0.001399	7.28e-08	+	337030	1	-	Neale-B_UKBB_EUR_2017
rs1056441	rs1056441	chr20:62370349	chr20:63738996	C/T	Current tobacco smoking	EFO_0006527	Neale B	UKBB	European	2017	0.007527	0.001399	7.4e-08	+	337030	1	-	Neale-B_UKBB_EUR_2017
rs1056441	rs1056441	chr20:62370349	chr20:63738996	C/T	Current tobacco smoking	EFO_0006527	Neale B	UKBB	European	2017	0.007523	0.001399	7.52e-08	+	337030	1	-	Neale-B_UKBB_EUR_2017
rs1056441	rs1056441	chr20:62370349	chr20:63738996	C/T	Plateletcrit	EFO_0004586	Astle W	27863252	European	2016	0.02091	0.003891	7.66e-08	+	173480	2	IVNT	Astle-W_Blood-Cell-Traits_EUR_2016
rs1056441	rs1056441	chr20:62370349	chr20:63738996	C/T	Ulcerative colitis	EFO_0000729	IBDGC	26192919	European	2015	0.1254	0.0233	7.87e-08	+	27432	8	log OR	IBDGC_Ulcerative-Colitis_EUR_2015
rs1056441	rs1056441	chr20:62370349	chr20:63738996	C/T	Current tobacco smoking	EFO_0006527	Neale B	UKBB	European	2017	0.007498	0.001399	8.34e-08	+	337030	1	-	Neale-B_UKBB_EUR_2017
rs1056441	rs1056441	chr20:62370349	chr20:63738996	C/T	Plateletcrit	EFO_0004586	Astle W	27863252	European	2016	0.02085	0.003891	8.41e-08	+	173480	2	IVNT	Astle-W_Blood-Cell-Traits_EUR_2016
rs1056441	rs1056441	chr20:62370349	chr20:63738996	C/T	Plateletcrit	EFO_0004586	Astle W	27863252	European	2016	0.02082	0.003904	9.67e-08	+	173480	2	IVNT	Astle-W_Blood-Cell-Traits_EUR_2016
rs1056441	rs1056441	chr20:62370349	chr20:63738996	C/T	Plateletcrit	EFO_0004586	Astle W	27863252	European	2016	0.02062	0.003868	9.81e-08	+	173480	2	IVNT	Astle-W_Blood-Cell-Traits_EUR_2016
rs1056441	rs1056441	chr20:62370349	chr20:63738996	C/T	Leg fat mass right	-	Neale B	UKBB	European	2017	0.01095	0.002054	9.83e-08	+	331293	1	IVNT	Neale-B_UKBB_EUR_2017
rs1056441	rs1056441	chr20:62370349	chr20:63738996	C/T	Plateletcrit	EFO_0004586	Astle W	27863252	European	2016	0.0206	0.003866	9.84e-08	+	173480	2	IVNT	Astle-W_Blood-Cell-Traits_EUR_2016
rs1056441	rs1056441	chr20:62370349	chr20:63738996	C/T	Trunk fat percentage	-	Neale B	UKBB	European	2017	0.01312	0.002462	9.86e-08	+	331113	1	IVNT	Neale-B_UKBB_EUR_2017
rs1056441	rs1056441	chr20:62370349	chr20:63738996	C/T	Ulcerative colitis	EFO_0000729	IBDGC	26192919	European	2015	0.1238	0.0233	1.04e-07	+	27432	8	log OR	IBDGC_Ulcerative-Colitis_EUR_2015
rs1056441	rs1056441	chr20:62370349	chr20:63738996	C/T	Current tobacco smoking	EFO_0006527	Neale B	UKBB	European	2017	0.007436	0.001399	1.06e-07	+	337030	1	-	Neale-B_UKBB_EUR_2017
rs1056441	rs1056441	chr20:62370349	chr20:63738996	C/T	Current tobacco smoking	EFO_0006527	Neale B	UKBB	European	2017	0.00744	0.001401	1.1e-07	+	337030	1	-	Neale-B_UKBB_EUR_2017
rs1056441	rs1056441	chr20:62370349	chr20:63738996	C/T	Arm fat mass left	-	Neale B	UKBB	European	2017	0.01347	0.002538	1.11e-07	+	331164	1	IVNT	Neale-B_UKBB_EUR_2017
rs1056441	rs1056441	chr20:62370349	chr20:63738996	C/T	Myeloid white cell count	EFO_0004586	Astle W	27863252	European	2016	0.02022	0.003812	1.14e-07	+	173480	2	IVNT	Astle-W_Blood-Cell-Traits_EUR_2016
rs1056441	rs1056441	chr20:62370349	chr20:63738996	C/T	Myeloid white cell count	EFO_0004586	Astle W	27863252	European	2016	0.02021	0.003811	1.14e-07	+	173480	2	IVNT	Astle-W_Blood-Cell-Traits_EUR_2016
rs1056441	rs1056441	chr20:62370349	chr20:63738996	C/T	Myeloid white cell count	EFO_0004586	Astle W	27863252	European	2016	0.02018	0.003809	1.17e-07	+	173480	2	IVNT	Astle-W_Blood-Cell-Traits_EUR_2016
rs1056441	rs1056441	chr20:62370349	chr20:63738996	C/T	Plateletcrit	EFO_0004586	Astle W	27863252	European	2016	0.02069	0.003908	1.2e-07	+	173480	2	IVNT	Astle-W_Blood-Cell-Traits_EUR_2016
rs1056441	rs1056441	chr20:62370349	chr20:63738996	C/T	Ulcerative colitis	EFO_0000729	IBDGC	26192919	European	2015	0.1231	0.0233	1.22e-07	+	27432	8	log OR	IBDGC_Ulcerative-Colitis_EUR_2015
rs1056441	rs1056441	chr20:62370349	chr20:63738996	C/T	Plateletcrit	EFO_0004586	Astle W	27863252	European	2016	0.02059	0.003895	1.24e-07	+	173480	2	IVNT	Astle-W_Blood-Cell-Traits_EUR_2016
rs1056441	rs1056441	chr20:62370349	chr20:63738996	C/T	Arm fat mass left	-	Neale B	UKBB	European	2017	0.01338	0.002533	1.28e-07	+	331164	1	IVNT	Neale-B_UKBB_EUR_2017
rs1056441	rs1056441	chr20:62370349	chr20:63738996	C/T	Hip circumference	EFO_0005093	Neale B	UKBB	European	2017	0.01345	0.002547	1.29e-07	+	336601	1	IVNT	Neale-B_UKBB_EUR_2017
rs1056441	rs1056441	chr20:62370349	chr20:63738996	C/T	Hip circumference	EFO_0005093	Neale B	UKBB	European	2017	0.01343	0.002547	1.34e-07	+	336601	1	IVNT	Neale-B_UKBB_EUR_2017
rs1056441	rs1056441	chr20:62370349	chr20:63738996	C/T	Leg fat mass right	-	Neale B	UKBB	European	2017	0.01083	0.002054	1.36e-07	+	331293	1	IVNT	Neale-B_UKBB_EUR_2017
rs1056441	rs1056441	chr20:62370349	chr20:63738996	C/T	No blood clot, bronchitis, emphysema, asthma, rhinitis, eczema or allergy diagnosed by doctor	-	Neale B	UKBB	European	2017	-0.006379	0.001211	1.38e-07	-	336782	1	risk diff	Neale-B_UKBB_EUR_2017
rs1056441	rs1056441	chr20:62370349	chr20:63738996	C/T	Myeloid white cell count	EFO_0004586	Astle W	27863252	European	2016	0.02005	0.003807	1.39e-07	+	173480	2	IVNT	Astle-W_Blood-Cell-Traits_EUR_2016
rs1056441	rs1056441	chr20:62370349	chr20:63738996	C/T	Arm fat mass left	-	Neale B	UKBB	European	2017	0.01333	0.002533	1.41e-07	+	331164	1	IVNT	Neale-B_UKBB_EUR_2017
rs1056441	rs1056441	chr20:62370349	chr20:63738996	C/T	Arm fat mass left	-	Neale B	UKBB	European	2017	0.01333	0.002533	1.41e-07	+	331164	1	IVNT	Neale-B_UKBB_EUR_2017
rs1056441	rs1056441	chr20:62370349	chr20:63738996	C/T	Ulcerative colitis	EFO_0000729	IBDGC	26192919	European	2015	0.1226	0.0233	1.41e-07	+	27432	8	log OR	IBDGC_Ulcerative-Colitis_EUR_2015
rs1056441	rs1056441	chr20:62370349	chr20:63738996	C/T	Forced expiratory volume in 1-second, best measure	EFO_0004314	Neale B	UKBB	European	2017	-0.01326	0.00252	1.42e-07	-	255492	1	IVNT	Neale-B_UKBB_EUR_2017
rs1056441	rs1056441	chr20:62370349	chr20:63738996	C/T	Arm fat mass left	-	Neale B	UKBB	European	2017	0.01332	0.002533	1.45e-07	+	331164	1	IVNT	Neale-B_UKBB_EUR_2017
rs1056441	rs1056441	chr20:62370349	chr20:63738996	C/T	Myeloid white cell count	EFO_0004586	Astle W	27863252	European	2016	0.02003	0.003809	1.45e-07	+	173480	2	IVNT	Astle-W_Blood-Cell-Traits_EUR_2016
rs1056441	rs1056441	chr20:62370349	chr20:63738996	C/T	Myeloid white cell count	EFO_0004586	Astle W	27863252	European	2016	0.02003	0.003808	1.45e-07	+	173480	2	IVNT	Astle-W_Blood-Cell-Traits_EUR_2016
rs1056441	rs1056441	chr20:62370349	chr20:63738996	C/T	Ulcerative colitis	EFO_0000729	IBDGC	26192919	European	2015	0.1229	0.0234	1.45e-07	+	27432	8	log OR	IBDGC_Ulcerative-Colitis_EUR_2015
rs1056441	rs1056441	chr20:62370349	chr20:63738996	C/T	Plateletcrit	EFO_0004586	Astle W	27863252	European	2016	0.02036	0.003874	1.47e-07	+	173480	2	IVNT	Astle-W_Blood-Cell-Traits_EUR_2016
rs1056441	rs1056441	chr20:62370349	chr20:63738996	C/T	Plateletcrit	EFO_0004586	Astle W	27863252	European	2016	0.02047	0.003899	1.52e-07	+	173480	2	IVNT	Astle-W_Blood-Cell-Traits_EUR_2016
rs1056441	rs1056441	chr20:62370349	chr20:63738996	C/T	Arm fat mass left	-	Neale B	UKBB	European	2017	0.01331	0.002536	1.52e-07	+	331164	1	IVNT	Neale-B_UKBB_EUR_2017
rs1056441	rs1056441	chr20:62370349	chr20:63738996	C/T	Ulcerative colitis	EFO_0000729	IBDGC	26192919	European	2015	0.1221	0.0233	1.52e-07	+	27432	8	log OR	IBDGC_Ulcerative-Colitis_EUR_2015
rs1056441	rs1056441	chr20:62370349	chr20:63738996	C/T	Arm fat mass left	-	Neale B	UKBB	European	2017	0.01329	0.002533	1.54e-07	+	331164	1	IVNT	Neale-B_UKBB_EUR_2017
rs1056441	rs1056441	chr20:62370349	chr20:63738996	C/T	Myeloid white cell count	EFO_0004586	Astle W	27863252	European	2016	0.02	0.003812	1.56e-07	+	173480	2	IVNT	Astle-W_Blood-Cell-Traits_EUR_2016
rs1056441	rs1056441	chr20:62370349	chr20:63738996	C/T	No blood clot, bronchitis, emphysema, asthma, rhinitis, eczema or allergy diagnosed by doctor	-	Neale B	UKBB	European	2017	-0.006349	0.001211	1.57e-07	-	336782	1	risk diff	Neale-B_UKBB_EUR_2017
rs1056441	rs1056441	chr20:62370349	chr20:63738996	C/T	Arm fat mass left	-	Neale B	UKBB	European	2017	0.01329	0.002534	1.57e-07	+	331164	1	IVNT	Neale-B_UKBB_EUR_2017
rs1056441	rs1056441	chr20:62370349	chr20:63738996	C/T	No blood clot, bronchitis, emphysema, asthma, rhinitis, eczema or allergy diagnosed by doctor	-	Neale B	UKBB	European	2017	-0.006347	0.001211	1.58e-07	-	336782	1	risk diff	Neale-B_UKBB_EUR_2017
rs1056441	rs1056441	chr20:62370349	chr20:63738996	C/T	No blood clot, bronchitis, emphysema, asthma, rhinitis, eczema or allergy diagnosed by doctor	-	Neale B	UKBB	European	2017	-0.006346	0.001211	1.6e-07	-	336782	1	risk diff	Neale-B_UKBB_EUR_2017
rs1056441	rs1056441	chr20:62370349	chr20:63738996	C/T	No blood clot, bronchitis, emphysema, asthma, rhinitis, eczema or allergy diagnosed by doctor	-	Neale B	UKBB	European	2017	-0.006348	0.001211	1.6e-07	-	336782	1	risk diff	Neale-B_UKBB_EUR_2017
rs1056441	rs1056441	chr20:62370349	chr20:63738996	C/T	Ulcerative colitis	EFO_0000729	IBDGC	26192919	European	2015	0.122	0.0233	1.61e-07	+	27432	8	log OR	IBDGC_Ulcerative-Colitis_EUR_2015
rs1056441	rs1056441	chr20:62370349	chr20:63738996	C/T	Myeloid white cell count	EFO_0004586	Astle W	27863252	European	2016	0.01995	0.003809	1.61e-07	+	173480	2	IVNT	Astle-W_Blood-Cell-Traits_EUR_2016
rs1056441	rs1056441	chr20:62370349	chr20:63738996	C/T	No blood clot, bronchitis, emphysema, asthma, rhinitis, eczema or allergy diagnosed by doctor	-	Neale B	UKBB	European	2017	-0.00634	0.001211	1.63e-07	-	336782	1	risk diff	Neale-B_UKBB_EUR_2017
rs1056441	rs1056441	chr20:62370349	chr20:63738996	C/T	No blood clot, bronchitis, emphysema, asthma, rhinitis, eczema or allergy diagnosed by doctor	-	Neale B	UKBB	European	2017	-0.006338	0.001211	1.65e-07	-	336782	1	risk diff	Neale-B_UKBB_EUR_2017
rs1056441	rs1056441	chr20:62370349	chr20:63738996	C/T	Arm fat mass left	-	Neale B	UKBB	European	2017	0.01325	0.002533	1.68e-07	+	331164	1	IVNT	Neale-B_UKBB_EUR_2017
rs1056441	rs1056441	chr20:62370349	chr20:63738996	C/T	Arm fat mass left	-	Neale B	UKBB	European	2017	0.01326	0.002535	1.68e-07	+	331164	1	IVNT	Neale-B_UKBB_EUR_2017
rs1056441	rs1056441	chr20:62370349	chr20:63738996	C/T	Ulcerative colitis	EFO_0000729	IBDGC	26192919	European	2015	0.1231	0.0235	1.69e-07	+	27432	8	log OR	IBDGC_Ulcerative-Colitis_EUR_2015
rs1056441	rs1056441	chr20:62370349	chr20:63738996	C/T	Forced expiratory volume in 1-second, predicted percentage	EFO_0004314	Neale B	UKBB	European	2017	-0.02462	0.004707	1.7e-07	-	110423	1	IVNT	Neale-B_UKBB_EUR_2017
rs1056441	rs1056441	chr20:62370349	chr20:63738996	C/T	Hip circumference	EFO_0005093	Neale B	UKBB	European	2017	0.01331	0.002546	1.71e-07	+	336601	1	IVNT	Neale-B_UKBB_EUR_2017
rs1056441	rs1056441	chr20:62370349	chr20:63738996	C/T	No blood clot, bronchitis, emphysema, asthma, rhinitis, eczema or allergy diagnosed by doctor	-	Neale B	UKBB	European	2017	-0.006329	0.001211	1.72e-07	-	336782	1	risk diff	Neale-B_UKBB_EUR_2017
rs1056441	rs1056441	chr20:62370349	chr20:63738996	C/T	No blood clot, bronchitis, emphysema, asthma, rhinitis, eczema or allergy diagnosed by doctor	-	Neale B	UKBB	European	2017	-0.006328	0.001211	1.73e-07	-	336782	1	risk diff	Neale-B_UKBB_EUR_2017
rs1056441	rs1056441	chr20:62370349	chr20:63738996	C/T	Hip circumference	EFO_0005093	Neale B	UKBB	European	2017	0.0133	0.002546	1.75e-07	+	336601	1	IVNT	Neale-B_UKBB_EUR_2017
rs1056441	rs1056441	chr20:62370349	chr20:63738996	C/T	Ulcerative colitis	EFO_0000729	IBDGC	26192919	European	2015	0.1221	0.0234	1.78e-07	+	27432	8	log OR	IBDGC_Ulcerative-Colitis_EUR_2015
rs1056441	rs1056441	chr20:62370349	chr20:63738996	C/T	Ulcerative colitis	EFO_0000729	IBDGC	26192919	European	2015	0.1221	0.0234	1.79e-07	+	27432	8	log OR	IBDGC_Ulcerative-Colitis_EUR_2015
rs1056441	rs1056441	chr20:62370349	chr20:63738996	C/T	Arm fat percentage right	-	Neale B	UKBB	European	2017	0.01028	0.001969	1.8e-07	+	331249	1	IVNT	Neale-B_UKBB_EUR_2017
rs1056441	rs1056441	chr20:62370349	chr20:63738996	C/T	No blood clot, bronchitis, emphysema, asthma, rhinitis, eczema or allergy diagnosed by doctor	-	Neale B	UKBB	European	2017	-0.006318	0.001212	1.84e-07	-	336782	1	risk diff	Neale-B_UKBB_EUR_2017
rs1056441	rs1056441	chr20:62370349	chr20:63738996	C/T	Ulcerative colitis	EFO_0000729	IBDGC	26192919	European	2015	0.1224	0.0235	1.86e-07	+	27432	8	log OR	IBDGC_Ulcerative-Colitis_EUR_2015
rs1056441	rs1056441	chr20:62370349	chr20:63738996	C/T	Ulcerative colitis	EFO_0000729	IBDGC	26192919	European	2015	0.1218	0.0234	1.86e-07	+	27432	8	log OR	IBDGC_Ulcerative-Colitis_EUR_2015
rs1056441	rs1056441	chr20:62370349	chr20:63738996	C/T	Arm fat mass left	-	Neale B	UKBB	European	2017	0.0132	0.002533	1.87e-07	+	331164	1	IVNT	Neale-B_UKBB_EUR_2017
rs1056441	rs1056441	chr20:62370349	chr20:63738996	C/T	Current tobacco smoking	EFO_0006527	Neale B	UKBB	European	2017	0.007286	0.001398	1.87e-07	+	337030	1	-	Neale-B_UKBB_EUR_2017
rs1056441	rs1056441	chr20:62370349	chr20:63738996	C/T	Myeloid white cell count	EFO_0004586	Astle W	27863252	European	2016	0.01984	0.003809	1.91e-07	+	173480	2	IVNT	Astle-W_Blood-Cell-Traits_EUR_2016
rs1056441	rs1056441	chr20:62370349	chr20:63738996	C/T	Arm fat mass left	-	Neale B	UKBB	European	2017	0.01319	0.002533	1.92e-07	+	331164	1	IVNT	Neale-B_UKBB_EUR_2017
rs1056441	rs1056441	chr20:62370349	chr20:63738996	C/T	No blood clot, bronchitis, emphysema, asthma, rhinitis, eczema or allergy diagnosed by doctor	-	Neale B	UKBB	European	2017	-0.00631	0.001212	1.92e-07	-	336782	1	risk diff	Neale-B_UKBB_EUR_2017
rs1056441	rs1056441	chr20:62370349	chr20:63738996	C/T	Current tobacco smoking	EFO_0006527	Neale B	UKBB	European	2017	0.007278	0.001398	1.92e-07	+	337030	1	-	Neale-B_UKBB_EUR_2017
rs1056441	rs1056441	chr20:62370349	chr20:63738996	C/T	Waist circumference	EFO_0004342	Neale B	UKBB	European	2017	0.01185	0.002277	1.95e-07	+	336639	1	IVNT	Neale-B_UKBB_EUR_2017
rs1056441	rs1056441	chr20:62370349	chr20:63738996	C/T	Myeloid white cell count	EFO_0004586	Astle W	27863252	European	2016	0.01992	0.00383	1.98e-07	+	173480	2	IVNT	Astle-W_Blood-Cell-Traits_EUR_2016
rs1056441	rs1056441	chr20:62370349	chr20:63738996	C/T	Waist circumference	EFO_0004342	Neale B	UKBB	European	2017	0.01184	0.002277	2e-07	+	336639	1	IVNT	Neale-B_UKBB_EUR_2017
rs1056441	rs1056441	chr20:62370349	chr20:63738996	C/T	Hip circumference	EFO_0005093	Neale B	UKBB	European	2017	0.01325	0.00255	2.03e-07	+	336601	1	IVNT	Neale-B_UKBB_EUR_2017
rs1056441	rs1056441	chr20:62370349	chr20:63738996	C/T	Ulcerative colitis	EFO_0000729	IBDGC	26192919	European	2015	0.1216	0.0234	2.05e-07	+	27432	8	log OR	IBDGC_Ulcerative-Colitis_EUR_2015
rs1056441	rs1056441	chr20:62370349	chr20:63738996	C/T	Ulcerative colitis	EFO_0000729	IBDGC	26192919	European	2015	0.1214	0.0234	2.12e-07	+	27432	8	log OR	IBDGC_Ulcerative-Colitis_EUR_2015
rs1056441	rs1056441	chr20:62370349	chr20:63738996	C/T	Granulocyte count	EFO_0004586	Astle W	27863252	European	2016	0.01973	0.003802	2.12e-07	+	173480	2	IVNT	Astle-W_Blood-Cell-Traits_EUR_2016
rs1056441	rs1056441	chr20:62370349	chr20:63738996	C/T	Current tobacco smoking	EFO_0006527	Neale B	UKBB	European	2017	0.007304	0.001409	2.17e-07	+	337030	1	-	Neale-B_UKBB_EUR_2017
rs1056441	rs1056441	chr20:62370349	chr20:63738996	C/T	Granulocyte count	EFO_0004586	Astle W	27863252	European	2016	0.01969	0.003801	2.23e-07	+	173480	2	IVNT	Astle-W_Blood-Cell-Traits_EUR_2016
rs1056441	rs1056441	chr20:62370349	chr20:63738996	C/T	Ulcerative colitis	EFO_0000729	IBDGC	26192919	European	2015	0.1217	0.0235	2.27e-07	+	27432	8	log OR	IBDGC_Ulcerative-Colitis_EUR_2015
rs1056441	rs1056441	chr20:62370349	chr20:63738996	C/T	Arm fat percentage right	-	Neale B	UKBB	European	2017	0.01016	0.001965	2.34e-07	+	331249	1	IVNT	Neale-B_UKBB_EUR_2017
rs1056441	rs1056441	chr20:62370349	chr20:63738996	C/T	Hip circumference	EFO_0005093	Neale B	UKBB	European	2017	0.01316	0.002546	2.34e-07	+	336601	1	IVNT	Neale-B_UKBB_EUR_2017
rs1056441	rs1056441	chr20:62370349	chr20:63738996	C/T	Waist circumference	EFO_0004342	Neale B	UKBB	European	2017	0.01177	0.002277	2.34e-07	+	336639	1	IVNT	Neale-B_UKBB_EUR_2017
rs1056441	rs1056441	chr20:62370349	chr20:63738996	C/T	Waist circumference	EFO_0004342	Neale B	UKBB	European	2017	0.01177	0.002277	2.37e-07	+	336639	1	IVNT	Neale-B_UKBB_EUR_2017
rs1056441	rs1056441	chr20:62370349	chr20:63738996	C/T	Ulcerative colitis	EFO_0000729	IBDGC	26192919	European	2015	0.1217	0.0236	2.41e-07	+	27432	8	log OR	IBDGC_Ulcerative-Colitis_EUR_2015
rs1056441	rs1056441	chr20:62370349	chr20:63738996	C/T	Granulocyte count	EFO_0004586	Astle W	27863252	European	2016	0.01961	0.003799	2.43e-07	+	173480	2	IVNT	Astle-W_Blood-Cell-Traits_EUR_2016
rs1056441	rs1056441	chr20:62370349	chr20:63738996	C/T	Weight	EFO_0004338	Neale B	UKBB	European	2017	0.01168	0.002263	2.44e-07	+	336227	1	IVNT	Neale-B_UKBB_EUR_2017
rs1056441	rs1056441	chr20:62370349	chr20:63738996	C/T	Whole body fat mass	-	Neale B	UKBB	European	2017	0.01348	0.002613	2.5e-07	+	330762	1	IVNT	Neale-B_UKBB_EUR_2017
rs1056441	rs1056441	chr20:62370349	chr20:63738996	C/T	Current tobacco smoking	EFO_0006527	Neale B	UKBB	European	2017	0.007252	0.001406	2.52e-07	+	337030	1	-	Neale-B_UKBB_EUR_2017
rs1056441	rs1056441	chr20:62370349	chr20:63738996	C/T	Ulcerative colitis	EFO_0000729	IBDGC	26192919	European	2015	0.1206	0.0234	2.53e-07	+	27432	8	log OR	IBDGC_Ulcerative-Colitis_EUR_2015
rs1056441	rs1056441	chr20:62370349	chr20:63738996	C/T	Leg fat mass right	-	Neale B	UKBB	European	2017	0.0106	0.002056	2.54e-07	+	331293	1	IVNT	Neale-B_UKBB_EUR_2017
rs1056441	rs1056441	chr20:62370349	chr20:63738996	C/T	Current tobacco smoking	EFO_0006527	Neale B	UKBB	European	2017	0.007248	0.001406	2.55e-07	+	337030	1	-	Neale-B_UKBB_EUR_2017
rs1056441	rs1056441	chr20:62370349	chr20:63738996	C/T	Weight	EFO_0004338	Neale B	UKBB	European	2017	0.01165	0.002261	2.56e-07	+	336227	1	IVNT	Neale-B_UKBB_EUR_2017
rs1056441	rs1056441	chr20:62370349	chr20:63738996	C/T	Myeloid white cell count	EFO_0004586	Astle W	27863252	European	2016	0.01974	0.003832	2.6e-07	+	173480	2	IVNT	Astle-W_Blood-Cell-Traits_EUR_2016
rs1056441	rs1056441	chr20:62370349	chr20:63738996	C/T	Arm fat percentage right	-	Neale B	UKBB	European	2017	0.01012	0.001965	2.61e-07	+	331249	1	IVNT	Neale-B_UKBB_EUR_2017
rs1056441	rs1056441	chr20:62370349	chr20:63738996	C/T	Arm fat percentage right	-	Neale B	UKBB	European	2017	0.01012	0.001965	2.62e-07	+	331249	1	IVNT	Neale-B_UKBB_EUR_2017
rs1056441	rs1056441	chr20:62370349	chr20:63738996	C/T	Waist circumference	EFO_0004342	Neale B	UKBB	European	2017	0.01174	0.002281	2.67e-07	+	336639	1	IVNT	Neale-B_UKBB_EUR_2017
rs1056441	rs1056441	chr20:62370349	chr20:63738996	C/T	Arm fat percentage right	-	Neale B	UKBB	European	2017	0.01012	0.001967	2.69e-07	+	331249	1	IVNT	Neale-B_UKBB_EUR_2017
rs1056441	rs1056441	chr20:62370349	chr20:63738996	C/T	Arm fat percentage right	-	Neale B	UKBB	European	2017	0.01011	0.001965	2.71e-07	+	331249	1	IVNT	Neale-B_UKBB_EUR_2017
rs1056441	rs1056441	chr20:62370349	chr20:63738996	C/T	No blood clot, bronchitis, emphysema, asthma, rhinitis, eczema or allergy diagnosed by doctor	-	Neale B	UKBB	European	2017	-0.006236	0.001213	2.73e-07	-	336782	1	risk diff	Neale-B_UKBB_EUR_2017
rs1056441	rs1056441	chr20:62370349	chr20:63738996	C/T	Arm fat percentage right	-	Neale B	UKBB	European	2017	0.0101	0.001965	2.76e-07	+	331249	1	IVNT	Neale-B_UKBB_EUR_2017
rs1056441	rs1056441	chr20:62370349	chr20:63738996	C/T	Granulocyte count	EFO_0004586	Astle W	27863252	European	2016	0.01951	0.003799	2.81e-07	+	173480	2	IVNT	Astle-W_Blood-Cell-Traits_EUR_2016
rs1056441	rs1056441	chr20:62370349	chr20:63738996	C/T	Granulocyte count	EFO_0004586	Astle W	27863252	European	2016	0.0195	0.003798	2.85e-07	+	173480	2	IVNT	Astle-W_Blood-Cell-Traits_EUR_2016
rs1056441	rs1056441	chr20:62370349	chr20:63738996	C/T	Arm fat percentage right	-	Neale B	UKBB	European	2017	0.01009	0.001967	2.87e-07	+	331249	1	IVNT	Neale-B_UKBB_EUR_2017
rs1056441	rs1056441	chr20:62370349	chr20:63738996	C/T	Arm fat percentage left	-	Neale B	UKBB	European	2017	0.01006	0.00196	2.89e-07	+	331198	1	IVNT	Neale-B_UKBB_EUR_2017
rs1056441	rs1056441	chr20:62370349	chr20:63738996	C/T	Waist circumference	EFO_0004342	Neale B	UKBB	European	2017	0.01168	0.002277	2.89e-07	+	336639	1	IVNT	Neale-B_UKBB_EUR_2017
rs1056441	rs1056441	chr20:62370349	chr20:63738996	C/T	Current tobacco smoking	EFO_0006527	Neale B	UKBB	European	2017	0.007211	0.001406	2.94e-07	+	337030	1	-	Neale-B_UKBB_EUR_2017
rs1056441	rs1056441	chr20:62370349	chr20:63738996	C/T	Arm fat percentage right	-	Neale B	UKBB	European	2017	0.01007	0.001965	3.01e-07	+	331249	1	IVNT	Neale-B_UKBB_EUR_2017
rs1056441	rs1056441	chr20:62370349	chr20:63738996	C/T	Weight	EFO_0004338	Neale B	UKBB	European	2017	0.01157	0.002259	3.04e-07	+	336227	1	IVNT	Neale-B_UKBB_EUR_2017
rs1056441	rs1056441	chr20:62370349	chr20:63738996	C/T	Myeloid white cell count	EFO_0004586	Astle W	27863252	European	2016	0.01961	0.00383	3.05e-07	+	173480	2	IVNT	Astle-W_Blood-Cell-Traits_EUR_2016
rs1056441	rs1056441	chr20:62370349	chr20:63738996	C/T	Arm fat percentage right	-	Neale B	UKBB	European	2017	0.01006	0.001967	3.12e-07	+	331249	1	IVNT	Neale-B_UKBB_EUR_2017
rs1056441	rs1056441	chr20:62370349	chr20:63738996	C/T	Weight	EFO_0004338	Neale B	UKBB	European	2017	0.01156	0.00226	3.12e-07	+	336227	1	IVNT	Neale-B_UKBB_EUR_2017
rs1056441	rs1056441	chr20:62370349	chr20:63738996	C/T	Sum basophil neutrophil counts	EFO_0004586	Astle W	27863252	European	2016	0.01943	0.003799	3.12e-07	+	173480	2	IVNT	Astle-W_Blood-Cell-Traits_EUR_2016
rs1056441	rs1056441	chr20:62370349	chr20:63738996	C/T	Arm fat percentage right	-	Neale B	UKBB	European	2017	0.01006	0.001966	3.13e-07	+	331249	1	IVNT	Neale-B_UKBB_EUR_2017
rs1056441	rs1056441	chr20:62370349	chr20:63738996	C/T	Granulocyte count	EFO_0004586	Astle W	27863252	European	2016	0.01945	0.003802	3.13e-07	+	173480	2	IVNT	Astle-W_Blood-Cell-Traits_EUR_2016
rs1056441	rs1056441	chr20:62370349	chr20:63738996	C/T	Granulocyte count	EFO_0004586	Astle W	27863252	European	2016	0.01943	0.003799	3.13e-07	+	173480	2	IVNT	Astle-W_Blood-Cell-Traits_EUR_2016
rs1056441	rs1056441	chr20:62370349	chr20:63738996	C/T	Current tobacco smoking	EFO_0006527	Neale B	UKBB	European	2017	0.007188	0.001406	3.19e-07	+	337030	1	-	Neale-B_UKBB_EUR_2017
rs1056441	rs1056441	chr20:62370349	chr20:63738996	C/T	Trunk fat mass	EFO_0005409	Neale B	UKBB	European	2017	0.01378	0.002697	3.21e-07	+	331093	1	IVNT	Neale-B_UKBB_EUR_2017
rs1056441	rs1056441	chr20:62370349	chr20:63738996	C/T	Myeloid white cell count	EFO_0004586	Astle W	27863252	European	2016	0.01964	0.003845	3.27e-07	+	173480	2	IVNT	Astle-W_Blood-Cell-Traits_EUR_2016
rs1056441	rs1056441	chr20:62370349	chr20:63738996	C/T	Current tobacco smoking	EFO_0006527	Neale B	UKBB	European	2017	0.007181	0.001406	3.28e-07	+	337030	1	-	Neale-B_UKBB_EUR_2017
rs1056441	rs1056441	chr20:62370349	chr20:63738996	C/T	Weight	EFO_0004338	Neale B	UKBB	European	2017	0.01153	0.002259	3.29e-07	+	336227	1	IVNT	Neale-B_UKBB_EUR_2017
rs1056441	rs1056441	chr20:62370349	chr20:63738996	C/T	Weight	EFO_0004338	Neale B	UKBB	European	2017	0.01153	0.002259	3.29e-07	+	336227	1	IVNT	Neale-B_UKBB_EUR_2017
rs1056441	rs1056441	chr20:62370349	chr20:63738996	C/T	Current tobacco smoking	EFO_0006527	Neale B	UKBB	European	2017	0.007176	0.001406	3.35e-07	+	337030	1	-	Neale-B_UKBB_EUR_2017
rs1056441	rs1056441	chr20:62370349	chr20:63738996	C/T	Arm fat percentage right	-	Neale B	UKBB	European	2017	0.01003	0.001966	3.38e-07	+	331249	1	IVNT	Neale-B_UKBB_EUR_2017
rs1056441	rs1056441	chr20:62370349	chr20:63738996	C/T	Current tobacco smoking	EFO_0006527	Neale B	UKBB	European	2017	0.007173	0.001406	3.38e-07	+	337030	1	-	Neale-B_UKBB_EUR_2017
rs1056441	rs1056441	chr20:62370349	chr20:63738996	C/T	Weight	EFO_0004338	Neale B	UKBB	European	2017	0.01152	0.002259	3.39e-07	+	336227	1	IVNT	Neale-B_UKBB_EUR_2017
rs1056441	rs1056441	chr20:62370349	chr20:63738996	C/T	Arm fat mass right	-	Neale B	UKBB	European	2017	0.01285	0.002519	3.41e-07	+	331226	1	IVNT	Neale-B_UKBB_EUR_2017
rs1056441	rs1056441	chr20:62370349	chr20:63738996	C/T	Arm fat mass right	-	Neale B	UKBB	European	2017	0.01285	0.00252	3.43e-07	+	331226	1	IVNT	Neale-B_UKBB_EUR_2017
rs1056441	rs1056441	chr20:62370349	chr20:63738996	C/T	Current tobacco smoking	EFO_0006527	Neale B	UKBB	European	2017	0.007166	0.001406	3.47e-07	+	337030	1	-	Neale-B_UKBB_EUR_2017
rs1056441	rs1056441	chr20:62370349	chr20:63738996	C/T	Arm fat mass right	-	Neale B	UKBB	European	2017	0.01285	0.002523	3.51e-07	+	331226	1	IVNT	Neale-B_UKBB_EUR_2017
rs1056441	rs1056441	chr20:62370349	chr20:63738996	C/T	Myeloid white cell count	EFO_0004586	Astle W	27863252	European	2016	0.01951	0.00383	3.52e-07	+	173480	2	IVNT	Astle-W_Blood-Cell-Traits_EUR_2016
rs1056441	rs1056441	chr20:62370349	chr20:63738996	C/T	Weight	EFO_0004338	Neale B	UKBB	European	2017	0.01151	0.00226	3.53e-07	+	336227	1	IVNT	Neale-B_UKBB_EUR_2017
rs1056441	rs1056441	chr20:62370349	chr20:63738996	C/T	Sum basophil neutrophil counts	EFO_0004586	Astle W	27863252	European	2016	0.01932	0.003796	3.57e-07	+	173480	2	IVNT	Astle-W_Blood-Cell-Traits_EUR_2016
rs1056441	rs1056441	chr20:62370349	chr20:63738996	C/T	Current tobacco smoking	EFO_0006527	Neale B	UKBB	European	2017	0.007161	0.001407	3.61e-07	+	337030	1	-	Neale-B_UKBB_EUR_2017
rs1056441	rs1056441	chr20:62370349	chr20:63738996	C/T	Granulocyte count	EFO_0004586	Astle W	27863252	European	2016	0.01932	0.003797	3.61e-07	+	173480	2	IVNT	Astle-W_Blood-Cell-Traits_EUR_2016
rs1056441	rs1056441	chr20:62370349	chr20:63738996	C/T	Arm fat percentage left	-	Neale B	UKBB	European	2017	0.009953	0.001956	3.63e-07	+	331198	1	IVNT	Neale-B_UKBB_EUR_2017
rs1056441	rs1056441	chr20:62370349	chr20:63738996	C/T	Ulcerative colitis	EFO_0000729	IBDGC	26192919	European	2015	0.1189	0.0234	3.69e-07	+	27432	8	log OR	IBDGC_Ulcerative-Colitis_EUR_2015
rs1056441	rs1056441	chr20:62370349	chr20:63738996	C/T	Arm fat mass right	-	Neale B	UKBB	European	2017	0.01281	0.002519	3.69e-07	+	331226	1	IVNT	Neale-B_UKBB_EUR_2017
rs1056441	rs1056441	chr20:62370349	chr20:63738996	C/T	Arm fat mass right	-	Neale B	UKBB	European	2017	0.0128	0.002519	3.71e-07	+	331226	1	IVNT	Neale-B_UKBB_EUR_2017
rs1056441	rs1056441	chr20:62370349	chr20:63738996	C/T	Weight	EFO_0004338	Neale B	UKBB	European	2017	0.01147	0.002259	3.77e-07	+	336227	1	IVNT	Neale-B_UKBB_EUR_2017
rs1056441	rs1056441	chr20:62370349	chr20:63738996	C/T	Weight	EFO_0004338	Neale B	UKBB	European	2017	0.01147	0.002259	3.77e-07	+	336227	1	IVNT	Neale-B_UKBB_EUR_2017
rs1056441	rs1056441	chr20:62370349	chr20:63738996	C/T	Ulcerative colitis	EFO_0000729	Anderson CA	21297633	European	2011	NA	NA	3.87e-07	NA	26405	-	-	GRASP
rs1056441	rs1056441	chr20:62370349	chr20:63738996	C/T	Ulcerative colitis	EFO_0000729	IBDGC	23128233	European	2012	NA	NA	3.87e-07	NA	20672	8	log OR	IBDGC_Ulcerative-Colitis_EUR_2012
rs1056441	rs1056441	chr20:62370349	chr20:63738996	C/T	Granulocyte count	EFO_0004586	Astle W	27863252	European	2016	0.01938	0.00382	3.89e-07	+	173480	2	IVNT	Astle-W_Blood-Cell-Traits_EUR_2016
rs1056441	rs1056441	chr20:62370349	chr20:63738996	C/T	Current tobacco smoking	EFO_0006527	Neale B	UKBB	European	2017	0.00714	0.001408	3.93e-07	+	337030	1	-	Neale-B_UKBB_EUR_2017
rs1056441	rs1056441	chr20:62370349	chr20:63738996	C/T	Myeloid white cell count	EFO_0004586	Astle W	27863252	European	2016	0.01943	0.003831	3.94e-07	+	173480	2	IVNT	Astle-W_Blood-Cell-Traits_EUR_2016
rs1056441	rs1056441	chr20:62370349	chr20:63738996	C/T	Weight	EFO_0004338	Neale B	UKBB	European	2017	0.01146	0.002259	3.96e-07	+	336227	1	IVNT	Neale-B_UKBB_EUR_2017
rs1056441	rs1056441	chr20:62370349	chr20:63738996	C/T	Arm fat percentage left	-	Neale B	UKBB	European	2017	0.009912	0.001956	4.05e-07	+	331198	1	IVNT	Neale-B_UKBB_EUR_2017
rs1056441	rs1056441	chr20:62370349	chr20:63738996	C/T	Arm fat percentage left	-	Neale B	UKBB	European	2017	0.009912	0.001956	4.06e-07	+	331198	1	IVNT	Neale-B_UKBB_EUR_2017
rs1056441	rs1056441	chr20:62370349	chr20:63738996	C/T	Ulcerative colitis	EFO_0000729	IBDGC	23128233	European	2012	NA	NA	4.13e-07	NA	20672	8	log OR	IBDGC_Ulcerative-Colitis_EUR_2012
rs1056441	rs1056441	chr20:62370349	chr20:63738996	C/T	Arm fat percentage left	-	Neale B	UKBB	European	2017	0.009904	0.001956	4.14e-07	+	331198	1	IVNT	Neale-B_UKBB_EUR_2017
rs1056441	rs1056441	chr20:62370349	chr20:63738996	C/T	Myeloid white cell count	EFO_0004586	Astle W	27863252	European	2016	0.01941	0.003836	4.18e-07	+	173480	2	IVNT	Astle-W_Blood-Cell-Traits_EUR_2016
rs1056441	rs1056441	chr20:62370349	chr20:63738996	C/T	Arm fat percentage left	-	Neale B	UKBB	European	2017	0.009899	0.001956	4.19e-07	+	331198	1	IVNT	Neale-B_UKBB_EUR_2017
rs1056441	rs1056441	chr20:62370349	chr20:63738996	C/T	Current tobacco smoking	EFO_0006527	Neale B	UKBB	European	2017	0.007119	0.001407	4.21e-07	+	337030	1	-	Neale-B_UKBB_EUR_2017
rs1056441	rs1056441	chr20:62370349	chr20:63738996	C/T	Sum basophil neutrophil counts	EFO_0004586	Astle W	27863252	European	2016	0.0192	0.003796	4.25e-07	+	173480	2	IVNT	Astle-W_Blood-Cell-Traits_EUR_2016
rs1056441	rs1056441	chr20:62370349	chr20:63738996	C/T	Sum basophil neutrophil counts	EFO_0004586	Astle W	27863252	European	2016	0.0192	0.003798	4.28e-07	+	173480	2	IVNT	Astle-W_Blood-Cell-Traits_EUR_2016
rs1056441	rs1056441	chr20:62370349	chr20:63738996	C/T	Sum basophil neutrophil counts	EFO_0004586	Astle W	27863252	European	2016	0.01919	0.003795	4.29e-07	+	173480	2	IVNT	Astle-W_Blood-Cell-Traits_EUR_2016
rs1056441	rs1056441	chr20:62370349	chr20:63738996	C/T	Myeloid white cell count	EFO_0004586	Astle W	27863252	European	2016	0.01937	0.003831	4.3e-07	+	173480	2	IVNT	Astle-W_Blood-Cell-Traits_EUR_2016
rs1056441	rs1056441	chr20:62370349	chr20:63738996	C/T	Arm fat mass right	-	Neale B	UKBB	European	2017	0.01272	0.002519	4.41e-07	+	331226	1	IVNT	Neale-B_UKBB_EUR_2017
rs1056441	rs1056441	chr20:62370349	chr20:63738996	C/T	Myeloid white cell count	EFO_0004586	Astle W	27863252	European	2016	0.01934	0.003831	4.45e-07	+	173480	2	IVNT	Astle-W_Blood-Cell-Traits_EUR_2016
rs1056441	rs1056441	chr20:62370349	chr20:63738996	C/T	Arm fat percentage left	-	Neale B	UKBB	European	2017	0.009882	0.001958	4.46e-07	+	331198	1	IVNT	Neale-B_UKBB_EUR_2017
rs1056441	rs1056441	chr20:62370349	chr20:63738996	C/T	Arm fat percentage left	-	Neale B	UKBB	European	2017	0.009881	0.001958	4.52e-07	+	331198	1	IVNT	Neale-B_UKBB_EUR_2017
rs1056441	rs1056441	chr20:62370349	chr20:63738996	C/T	Arm fat percentage left	-	Neale B	UKBB	European	2017	0.009861	0.001957	4.66e-07	+	331198	1	IVNT	Neale-B_UKBB_EUR_2017
rs1056441	rs1056441	chr20:62370349	chr20:63738996	C/T	Weight	EFO_0004338	Neale B	UKBB	European	2017	0.01138	0.002259	4.69e-07	+	336227	1	IVNT	Neale-B_UKBB_EUR_2017
rs1056441	rs1056441	chr20:62370349	chr20:63738996	C/T	Myeloid white cell count	EFO_0004586	Astle W	27863252	European	2016	0.01931	0.003832	4.69e-07	+	173480	2	IVNT	Astle-W_Blood-Cell-Traits_EUR_2016
rs1056441	rs1056441	chr20:62370349	chr20:63738996	C/T	Sum basophil neutrophil counts	EFO_0004586	Astle W	27863252	European	2016	0.01912	0.003795	4.7e-07	+	173480	2	IVNT	Astle-W_Blood-Cell-Traits_EUR_2016
rs1056441	rs1056441	chr20:62370349	chr20:63738996	C/T	Sum basophil neutrophil counts	EFO_0004586	Astle W	27863252	European	2016	0.01913	0.003799	4.76e-07	+	173480	2	IVNT	Astle-W_Blood-Cell-Traits_EUR_2016
rs1056441	rs1056441	chr20:62370349	chr20:63738996	C/T	Ulcerative colitis	EFO_0000729	IBDGC	23128233	European	2012	NA	NA	4.78e-07	NA	20672	8	log OR	IBDGC_Ulcerative-Colitis_EUR_2012
rs1056441	rs1056441	chr20:62370349	chr20:63738996	C/T	Myeloid white cell count	EFO_0004586	Astle W	27863252	European	2016	0.01929	0.003833	4.81e-07	+	173480	2	IVNT	Astle-W_Blood-Cell-Traits_EUR_2016
rs1056441	rs1056441	chr20:62370349	chr20:63738996	C/T	Ulcerative colitis	EFO_0000729	IBDGC	23128233	European	2012	NA	NA	4.86e-07	NA	20672	8	log OR	IBDGC_Ulcerative-Colitis_EUR_2012
rs1056441	rs1056441	chr20:62370349	chr20:63738996	C/T	Arm fat percentage left	-	Neale B	UKBB	European	2017	0.00984	0.001956	4.91e-07	+	331198	1	IVNT	Neale-B_UKBB_EUR_2017
rs1056441	rs1056441	chr20:62370349	chr20:63738996	C/T	Neutrophil percentage of white cells	EFO_0004586	Astle W	27863252	European	2016	0.019	0.003777	4.93e-07	+	173480	2	IVNT	Astle-W_Blood-Cell-Traits_EUR_2016
rs1056441	rs1056441	chr20:62370349	chr20:63738996	C/T	Granulocyte count	EFO_0004586	Astle W	27863252	European	2016	0.0191	0.003799	4.98e-07	+	173480	2	IVNT	Astle-W_Blood-Cell-Traits_EUR_2016
rs1056441	rs1056441	chr20:62370349	chr20:63738996	C/T	Granulocyte count	EFO_0004586	Astle W	27863252	European	2016	0.01921	0.003822	5e-07	+	173480	2	IVNT	Astle-W_Blood-Cell-Traits_EUR_2016
rs1056441	rs1056441	chr20:62370349	chr20:63738996	C/T	Arm fat percentage left	-	Neale B	UKBB	European	2017	0.009833	0.001958	5.11e-07	+	331198	1	IVNT	Neale-B_UKBB_EUR_2017
rs1056441	rs1056441	chr20:62370349	chr20:63738996	C/T	Sum basophil neutrophil counts	EFO_0004586	Astle W	27863252	European	2016	0.01914	0.003817	5.28e-07	+	173480	2	IVNT	Astle-W_Blood-Cell-Traits_EUR_2016
rs1056441	rs1056441	chr20:62370349	chr20:63738996	C/T	Wheeze or whistling in the chest in last year	EFO_0009715	Neale B	UKBB	European	2017	0.0055	0.001097	5.36e-07	+	331257	1	risk diff	Neale-B_UKBB_EUR_2017
rs1056441	rs1056441	chr20:62370349	chr20:63738996	C/T	Smoking status: current	EFO_0006527	Neale B	UKBB	European	2017	0.003893	0.0007768	5.4e-07	+	336024	1	risk diff	Neale-B_UKBB_EUR_2017
rs1056441	rs1056441	chr20:62370349	chr20:63738996	C/T	Allergic disease	EFO_0003785	Ferreira M	29083406	European	2017	0.0305	0.0061	5.41e-07	+	360838	13	log OR	Ferreira-M_Allergic-Disease_EUR_2017
rs1056441	rs1056441	chr20:62370349	chr20:63738996	C/T	Arm fat percentage left	-	Neale B	UKBB	European	2017	0.0098	0.001957	5.49e-07	+	331198	1	IVNT	Neale-B_UKBB_EUR_2017
rs1056441	rs1056441	chr20:62370349	chr20:63738996	C/T	Myeloid white cell count	EFO_0004586	Astle W	27863252	European	2016	0.01918	0.003832	5.57e-07	+	173480	2	IVNT	Astle-W_Blood-Cell-Traits_EUR_2016
rs1056441	rs1056441	chr20:62370349	chr20:63738996	C/T	Myeloid white cell count	EFO_0004586	Astle W	27863252	European	2016	0.01909	0.003816	5.6e-07	+	173480	2	IVNT	Astle-W_Blood-Cell-Traits_EUR_2016
rs1056441	rs1056441	chr20:62370349	chr20:63738996	C/T	Sum neutrophil eosinophil counts	EFO_0004586	Astle W	27863252	European	2016	0.01898	0.003796	5.73e-07	+	173480	2	IVNT	Astle-W_Blood-Cell-Traits_EUR_2016
rs1056441	rs1056441	chr20:62370349	chr20:63738996	C/T	Granulocyte count	EFO_0004586	Astle W	27863252	European	2016	0.01909	0.00382	5.84e-07	+	173480	2	IVNT	Astle-W_Blood-Cell-Traits_EUR_2016
rs1056441	rs1056441	chr20:62370349	chr20:63738996	C/T	Neutrophil percentage of white cells	EFO_0004586	Astle W	27863252	European	2016	0.01886	0.003775	5.86e-07	+	173480	2	IVNT	Astle-W_Blood-Cell-Traits_EUR_2016
rs1056441	rs1056441	chr20:62370349	chr20:63738996	C/T	Smoking status: current	EFO_0006527	Neale B	UKBB	European	2017	0.003874	0.0007767	6.09e-07	+	336024	1	risk diff	Neale-B_UKBB_EUR_2017
rs1056441	rs1056441	chr20:62370349	chr20:63738996	C/T	Smoking status: current	EFO_0006527	Neale B	UKBB	European	2017	0.003874	0.0007767	6.11e-07	+	336024	1	risk diff	Neale-B_UKBB_EUR_2017
rs1056441	rs1056441	chr20:62370349	chr20:63738996	C/T	Smoking status: current	EFO_0006527	Neale B	UKBB	European	2017	0.003873	0.0007768	6.19e-07	+	336024	1	risk diff	Neale-B_UKBB_EUR_2017
rs1056441	rs1056441	chr20:62370349	chr20:63738996	C/T	Smoking status: current	EFO_0006527	Neale B	UKBB	European	2017	0.003869	0.0007766	6.31e-07	+	336024	1	risk diff	Neale-B_UKBB_EUR_2017
rs1056441	rs1056441	chr20:62370349	chr20:63738996	C/T	Self-reported eczema or dermatitis	EFO_0000274	Neale B	UKBB	European	2017	0.002125	0.0004265	6.34e-07	+	337159	1	risk diff	Neale-B_UKBB_EUR_2017
rs1056441	rs1056441	chr20:62370349	chr20:63738996	C/T	Allergic disease	EFO_0003785	Ferreira M	29083406	European	2017	0.0303	0.0061	6.43e-07	+	360838	13	log OR	Ferreira-M_Allergic-Disease_EUR_2017
rs1056441	rs1056441	chr20:62370349	chr20:63738996	C/T	Granulocyte count	EFO_0004586	Astle W	27863252	European	2016	0.019	0.00382	6.54e-07	+	173480	2	IVNT	Astle-W_Blood-Cell-Traits_EUR_2016
rs1056441	rs1056441	chr20:62370349	chr20:63738996	C/T	Sum neutrophil eosinophil counts	EFO_0004586	Astle W	27863252	European	2016	0.01887	0.003793	6.54e-07	+	173480	2	IVNT	Astle-W_Blood-Cell-Traits_EUR_2016
rs1056441	rs1056441	chr20:62370349	chr20:63738996	C/T	Sum neutrophil eosinophil counts	EFO_0004586	Astle W	27863252	European	2016	0.01887	0.003795	6.67e-07	+	173480	2	IVNT	Astle-W_Blood-Cell-Traits_EUR_2016
rs1056441	rs1056441	chr20:62370349	chr20:63738996	C/T	Sum basophil neutrophil counts	EFO_0004586	Astle W	27863252	European	2016	0.01898	0.003819	6.69e-07	+	173480	2	IVNT	Astle-W_Blood-Cell-Traits_EUR_2016
rs1056441	rs1056441	chr20:62370349	chr20:63738996	C/T	Allergic disease	EFO_0003785	Ferreira M	29083406	European	2017	0.0302	0.0061	6.76e-07	+	360838	13	log OR	Ferreira-M_Allergic-Disease_EUR_2017
rs1056441	rs1056441	chr20:62370349	chr20:63738996	C/T	Neutrophil percentage of white cells	EFO_0004586	Astle W	27863252	European	2016	0.01885	0.003795	6.77e-07	+	173480	2	IVNT	Astle-W_Blood-Cell-Traits_EUR_2016
rs1056441	rs1056441	chr20:62370349	chr20:63738996	C/T	Granulocyte count	EFO_0004586	Astle W	27863252	European	2016	0.01905	0.003835	6.78e-07	+	173480	2	IVNT	Astle-W_Blood-Cell-Traits_EUR_2016
rs1056441	rs1056441	chr20:62370349	chr20:63738996	C/T	Myeloid white cell count	EFO_0004586	Astle W	27863252	European	2016	0.01905	0.003836	6.87e-07	+	173480	2	IVNT	Astle-W_Blood-Cell-Traits_EUR_2016
rs1056441	rs1056441	chr20:62370349	chr20:63738996	C/T	Sum basophil neutrophil counts	EFO_0004586	Astle W	27863252	European	2016	0.01882	0.003794	7.02e-07	+	173480	2	IVNT	Astle-W_Blood-Cell-Traits_EUR_2016
rs1056441	rs1056441	chr20:62370349	chr20:63738996	C/T	Allergic disease	EFO_0003785	Ferreira M	29083406	European	2017	0.0302	0.0061	7.03e-07	+	360838	13	log OR	Ferreira-M_Allergic-Disease_EUR_2017
rs1056441	rs1056441	chr20:62370349	chr20:63738996	C/T	Allergic disease	EFO_0003785	Ferreira M	29083406	European	2017	0.0302	0.0061	7.33e-07	+	360838	13	log OR	Ferreira-M_Allergic-Disease_EUR_2017
rs1056441	rs1056441	chr20:62370349	chr20:63738996	C/T	Sum neutrophil eosinophil counts	EFO_0004586	Astle W	27863252	European	2016	0.01876	0.003792	7.58e-07	+	173480	2	IVNT	Astle-W_Blood-Cell-Traits_EUR_2016
rs1056441	rs1056441	chr20:62370349	chr20:63738996	C/T	Sum neutrophil eosinophil counts	EFO_0004586	Astle W	27863252	European	2016	0.01876	0.003793	7.61e-07	+	173480	2	IVNT	Astle-W_Blood-Cell-Traits_EUR_2016
rs1056441	rs1056441	chr20:62370349	chr20:63738996	C/T	Granulocyte count	EFO_0004586	Astle W	27863252	European	2016	0.01892	0.003826	7.63e-07	+	173480	2	IVNT	Astle-W_Blood-Cell-Traits_EUR_2016
rs1056441	rs1056441	chr20:62370349	chr20:63738996	C/T	Allergic disease	EFO_0003785	Ferreira M	29083406	European	2017	0.0301	0.0061	7.65e-07	+	360838	13	log OR	Ferreira-M_Allergic-Disease_EUR_2017
rs1056441	rs1056441	chr20:62370349	chr20:63738996	C/T	Granulocyte count	EFO_0004586	Astle W	27863252	European	2016	0.01888	0.003821	7.74e-07	+	173480	2	IVNT	Astle-W_Blood-Cell-Traits_EUR_2016
rs1056441	rs1056441	chr20:62370349	chr20:63738996	C/T	Granulocyte count	EFO_0004586	Astle W	27863252	European	2016	0.01888	0.003821	7.75e-07	+	173480	2	IVNT	Astle-W_Blood-Cell-Traits_EUR_2016
rs1056441	rs1056441	chr20:62370349	chr20:63738996	C/T	Allergic disease	EFO_0003785	Ferreira M	29083406	European	2017	0.0302	0.0061	7.8e-07	+	360838	13	log OR	Ferreira-M_Allergic-Disease_EUR_2017
rs1056441	rs1056441	chr20:62370349	chr20:63738996	C/T	Sum basophil neutrophil counts	EFO_0004586	Astle W	27863252	European	2016	0.01886	0.003817	7.81e-07	+	173480	2	IVNT	Astle-W_Blood-Cell-Traits_EUR_2016
rs1056441	rs1056441	chr20:62370349	chr20:63738996	C/T	Neutrophil percentage of white cells	EFO_0004586	Astle W	27863252	European	2016	0.01863	0.003774	7.98e-07	+	173480	2	IVNT	Astle-W_Blood-Cell-Traits_EUR_2016
rs1056441	rs1056441	chr20:62370349	chr20:63738996	C/T	Smoking status: current	EFO_0006527	Neale B	UKBB	European	2017	0.003836	0.000778	8.18e-07	+	336024	1	risk diff	Neale-B_UKBB_EUR_2017
rs1056441	rs1056441	chr20:62370349	chr20:63738996	C/T	Sum neutrophil eosinophil counts	EFO_0004586	Astle W	27863252	European	2016	0.01871	0.003796	8.3e-07	+	173480	2	IVNT	Astle-W_Blood-Cell-Traits_EUR_2016
rs1056441	rs1056441	chr20:62370349	chr20:63738996	C/T	Neutrophil count	EFO_0004586	Astle W	27863252	European	2016	0.01869	0.003792	8.32e-07	+	173480	2	IVNT	Astle-W_Blood-Cell-Traits_EUR_2016
rs1056441	rs1056441	chr20:62370349	chr20:63738996	C/T	Sum neutrophil eosinophil counts	EFO_0004586	Astle W	27863252	European	2016	0.01868	0.003792	8.38e-07	+	173480	2	IVNT	Astle-W_Blood-Cell-Traits_EUR_2016
rs1056441	rs1056441	chr20:62370349	chr20:63738996	C/T	Neutrophil percentage of white cells	EFO_0004586	Astle W	27863252	European	2016	0.0187	0.003797	8.48e-07	+	173480	2	IVNT	Astle-W_Blood-Cell-Traits_EUR_2016
rs1056441	rs1056441	chr20:62370349	chr20:63738996	C/T	Neutrophil percentage of white cells	EFO_0004586	Astle W	27863252	European	2016	0.01857	0.003775	8.63e-07	+	173480	2	IVNT	Astle-W_Blood-Cell-Traits_EUR_2016
rs1056441	rs1056441	chr20:62370349	chr20:63738996	C/T	Granulocyte count	EFO_0004586	Astle W	27863252	European	2016	0.01879	0.003821	8.73e-07	+	173480	2	IVNT	Astle-W_Blood-Cell-Traits_EUR_2016
rs1056441	rs1056441	chr20:62370349	chr20:63738996	C/T	Sum basophil neutrophil counts	EFO_0004586	Astle W	27863252	European	2016	0.01876	0.003817	8.84e-07	+	173480	2	IVNT	Astle-W_Blood-Cell-Traits_EUR_2016
rs1056441	rs1056441	chr20:62370349	chr20:63738996	C/T	Arm fat percentage right	-	Neale B	UKBB	European	2017	0.009608	0.001955	8.95e-07	+	331249	1	IVNT	Neale-B_UKBB_EUR_2017
rs1056441	rs1056441	chr20:62370349	chr20:63738996	C/T	Granulocyte count	EFO_0004586	Astle W	27863252	European	2016	0.01878	0.003822	9e-07	+	173480	2	IVNT	Astle-W_Blood-Cell-Traits_EUR_2016
rs1056441	rs1056441	chr20:62370349	chr20:63738996	C/T	Allergic disease	EFO_0003785	Ferreira M	29083406	European	2017	0.0299	0.0061	9.18e-07	+	360838	13	log OR	Ferreira-M_Allergic-Disease_EUR_2017
rs1056441	rs1056441	chr20:62370349	chr20:63738996	C/T	Waist circumference	EFO_0004342	Neale B	UKBB	European	2017	0.01117	0.002275	9.19e-07	+	336639	1	IVNT	Neale-B_UKBB_EUR_2017
rs1056441	rs1056441	chr20:62370349	chr20:63738996	C/T	Arm fat percentage right	-	Neale B	UKBB	European	2017	0.009595	0.001955	9.26e-07	+	331249	1	IVNT	Neale-B_UKBB_EUR_2017
rs1056441	rs1056441	chr20:62370349	chr20:63738996	C/T	Smoking status: current	EFO_0006527	Neale B	UKBB	European	2017	0.003812	0.0007768	9.26e-07	+	336024	1	risk diff	Neale-B_UKBB_EUR_2017
rs1056441	rs1056441	chr20:62370349	chr20:63738996	C/T	Neutrophil percentage of white cells	EFO_0004586	Astle W	27863252	European	2016	0.01851	0.003774	9.32e-07	+	173480	2	IVNT	Astle-W_Blood-Cell-Traits_EUR_2016
rs1056441	rs1056441	chr20:62370349	chr20:63738996	C/T	Granulocyte count	EFO_0004586	Astle W	27863252	European	2016	0.01875	0.003822	9.39e-07	+	173480	2	IVNT	Astle-W_Blood-Cell-Traits_EUR_2016
rs1056441	rs1056441	chr20:62370349	chr20:63738996	C/T	Neutrophil count	EFO_0004586	Astle W	27863252	European	2016	0.01858	0.003789	9.44e-07	+	173480	2	IVNT	Astle-W_Blood-Cell-Traits_EUR_2016
rs1056441	rs1056441	chr20:62370349	chr20:63738996	C/T	Sum basophil neutrophil counts	EFO_0004586	Astle W	27863252	European	2016	0.01878	0.003832	9.48e-07	+	173480	2	IVNT	Astle-W_Blood-Cell-Traits_EUR_2016
rs1056441	rs1056441	chr20:62370349	chr20:63738996	C/T	Sum neutrophil eosinophil counts	EFO_0004586	Astle W	27863252	European	2016	0.01867	0.003814	9.75e-07	+	173480	2	IVNT	Astle-W_Blood-Cell-Traits_EUR_2016
rs1056441	rs1056441	chr20:62370349	chr20:63738996	C/T	Sum basophil neutrophil counts	EFO_0004586	Astle W	27863252	European	2016	0.01858	0.003796	9.86e-07	+	173480	2	IVNT	Astle-W_Blood-Cell-Traits_EUR_2016
rs1056441	rs1056441	chr20:62370349	chr20:63738996	C/T	Sum basophil neutrophil counts	EFO_0004586	Astle W	27863252	European	2016	0.01871	0.003823	9.9e-07	+	173480	2	IVNT	Astle-W_Blood-Cell-Traits_EUR_2016
rs1056441	rs1056441	chr20:62370349	chr20:63738996	C/T	Arm fat percentage right	-	Neale B	UKBB	European	2017	0.009563	0.001955	1e-06	+	331249	1	IVNT	Neale-B_UKBB_EUR_2017
rs1056441	rs1056441	chr20:62370349	chr20:63738996	C/T	Arm fat percentage right	-	Neale B	UKBB	European	2017	0.009573	0.001958	1.02e-06	+	331249	1	IVNT	Neale-B_UKBB_EUR_2017
rs1056441	rs1056441	chr20:62370349	chr20:63738996	C/T	Arm fat percentage right	-	Neale B	UKBB	European	2017	0.009555	0.001955	1.02e-06	+	331249	1	IVNT	Neale-B_UKBB_EUR_2017
rs1056441	rs1056441	chr20:62370349	chr20:63738996	C/T	Hip circumference	EFO_0005093	Neale B	UKBB	European	2017	0.01244	0.002544	1.02e-06	+	336601	1	IVNT	Neale-B_UKBB_EUR_2017
rs1056441	rs1056441	chr20:62370349	chr20:63738996	C/T	Waist circumference	EFO_0004342	Neale B	UKBB	European	2017	0.01112	0.002276	1.02e-06	+	336639	1	IVNT	Neale-B_UKBB_EUR_2017
rs1056441	rs1056441	chr20:62370349	chr20:63738996	C/T	Pulse rate	EFO_0004326	Neale B	UKBB	European	2017	0.01349	0.002761	1.02e-06	+	317756	1	IVNT	Neale-B_UKBB_EUR_2017
rs1056441	rs1056441	chr20:62370349	chr20:63738996	C/T	Neutrophil percentage of white cells	EFO_0004586	Astle W	27863252	European	2016	0.01854	0.003796	1.03e-06	+	173480	2	IVNT	Astle-W_Blood-Cell-Traits_EUR_2016
rs1056441	rs1056441	chr20:62370349	chr20:63738996	C/T	Sum basophil neutrophil counts	EFO_0004586	Astle W	27863252	European	2016	0.01865	0.003818	1.04e-06	+	173480	2	IVNT	Astle-W_Blood-Cell-Traits_EUR_2016
rs1056441	rs1056441	chr20:62370349	chr20:63738996	C/T	Sum basophil neutrophil counts	EFO_0004586	Astle W	27863252	European	2016	0.01865	0.003818	1.04e-06	+	173480	2	IVNT	Astle-W_Blood-Cell-Traits_EUR_2016
rs1056441	rs1056441	chr20:62370349	chr20:63738996	C/T	Platelet count	EFO_0004586	Astle W	27863252	European	2016	0.01884	0.00386	1.06e-06	+	173480	2	IVNT	Astle-W_Blood-Cell-Traits_EUR_2016
rs1056441	rs1056441	chr20:62370349	chr20:63738996	C/T	Granulocyte count	EFO_0004586	Astle W	27863252	European	2016	0.01865	0.003822	1.07e-06	+	173480	2	IVNT	Astle-W_Blood-Cell-Traits_EUR_2016
rs1056441	rs1056441	chr20:62370349	chr20:63738996	C/T	Hip circumference	EFO_0005093	Neale B	UKBB	European	2017	0.01241	0.002544	1.07e-06	+	336601	1	IVNT	Neale-B_UKBB_EUR_2017
rs1056441	rs1056441	chr20:62370349	chr20:63738996	C/T	Arm fat mass left	-	Neale B	UKBB	European	2017	0.01228	0.00252	1.1e-06	+	331164	1	IVNT	Neale-B_UKBB_EUR_2017
rs1056441	rs1056441	chr20:62370349	chr20:63738996	C/T	Arm fat mass left	-	Neale B	UKBB	European	2017	0.01228	0.00252	1.11e-06	+	331164	1	IVNT	Neale-B_UKBB_EUR_2017
rs1056441	rs1056441	chr20:62370349	chr20:63738996	C/T	Sum neutrophil eosinophil counts	EFO_0004586	Astle W	27863252	European	2016	0.01847	0.003791	1.11e-06	+	173480	2	IVNT	Astle-W_Blood-Cell-Traits_EUR_2016
rs1056441	rs1056441	chr20:62370349	chr20:63738996	C/T	Platelet count	EFO_0004586	Astle W	27863252	European	2016	0.01878	0.003857	1.12e-06	+	173480	2	IVNT	Astle-W_Blood-Cell-Traits_EUR_2016
rs1056441	rs1056441	chr20:62370349	chr20:63738996	C/T	Neutrophil count	EFO_0004586	Astle W	27863252	European	2016	0.01845	0.003789	1.12e-06	+	173480	2	IVNT	Astle-W_Blood-Cell-Traits_EUR_2016
rs1056441	rs1056441	chr20:62370349	chr20:63738996	C/T	Neutrophil percentage of white cells	EFO_0004586	Astle W	27863252	European	2016	0.01855	0.00381	1.13e-06	+	173480	2	IVNT	Astle-W_Blood-Cell-Traits_EUR_2016
rs1056441	rs1056441	chr20:62370349	chr20:63738996	C/T	Neutrophil count	EFO_0004586	Astle W	27863252	European	2016	0.01844	0.00379	1.13e-06	+	173480	2	IVNT	Astle-W_Blood-Cell-Traits_EUR_2016
rs1056441	rs1056441	chr20:62370349	chr20:63738996	C/T	Neutrophil percentage of white cells	EFO_0004586	Astle W	27863252	European	2016	0.01847	0.003797	1.15e-06	+	173480	2	IVNT	Astle-W_Blood-Cell-Traits_EUR_2016
rs1056441	rs1056441	chr20:62370349	chr20:63738996	C/T	Arm fat percentage right	-	Neale B	UKBB	European	2017	0.009508	0.001955	1.15e-06	+	331249	1	IVNT	Neale-B_UKBB_EUR_2017
rs1056441	rs1056441	chr20:62370349	chr20:63738996	C/T	Arm fat mass left	-	Neale B	UKBB	European	2017	0.01225	0.00252	1.17e-06	+	331164	1	IVNT	Neale-B_UKBB_EUR_2017
rs1056441	rs1056441	chr20:62370349	chr20:63738996	C/T	Arm fat mass left	-	Neale B	UKBB	European	2017	0.01224	0.00252	1.18e-06	+	331164	1	IVNT	Neale-B_UKBB_EUR_2017
rs1056441	rs1056441	chr20:62370349	chr20:63738996	C/T	Sum basophil neutrophil counts	EFO_0004586	Astle W	27863252	European	2016	0.01854	0.003818	1.19e-06	+	173480	2	IVNT	Astle-W_Blood-Cell-Traits_EUR_2016
rs1056441	rs1056441	chr20:62370349	chr20:63738996	C/T	Arm fat mass left	-	Neale B	UKBB	European	2017	0.01225	0.002524	1.2e-06	+	331164	1	IVNT	Neale-B_UKBB_EUR_2017
rs1056441	rs1056441	chr20:62370349	chr20:63738996	C/T	Sum basophil neutrophil counts	EFO_0004586	Astle W	27863252	European	2016	0.01853	0.003819	1.22e-06	+	173480	2	IVNT	Astle-W_Blood-Cell-Traits_EUR_2016
rs1056441	rs1056441	chr20:62370349	chr20:63738996	C/T	Myeloid white cell count	EFO_0004586	Astle W	27863252	European	2016	0.01863	0.003841	1.22e-06	+	173480	2	IVNT	Astle-W_Blood-Cell-Traits_EUR_2016
rs1056441	rs1056441	chr20:62370349	chr20:63738996	C/T	Arm fat mass right	-	Neale B	UKBB	European	2017	0.01221	0.002517	1.22e-06	+	331226	1	IVNT	Neale-B_UKBB_EUR_2017
rs1056441	rs1056441	chr20:62370349	chr20:63738996	C/T	Neutrophil percentage of white cells	EFO_0004586	Astle W	27863252	European	2016	0.01844	0.003801	1.23e-06	+	173480	2	IVNT	Astle-W_Blood-Cell-Traits_EUR_2016
rs1056441	rs1056441	chr20:62370349	chr20:63738996	C/T	Neutrophil count	EFO_0004586	Astle W	27863252	European	2016	0.01838	0.003789	1.23e-06	+	173480	2	IVNT	Astle-W_Blood-Cell-Traits_EUR_2016
rs1056441	rs1056441	chr20:62370349	chr20:63738996	C/T	Neutrophil count	EFO_0004586	Astle W	27863252	European	2016	0.01839	0.003793	1.24e-06	+	173480	2	IVNT	Astle-W_Blood-Cell-Traits_EUR_2016
rs1056441	rs1056441	chr20:62370349	chr20:63738996	C/T	Neutrophil count	EFO_0004586	Astle W	27863252	European	2016	0.01839	0.003792	1.24e-06	+	173480	2	IVNT	Astle-W_Blood-Cell-Traits_EUR_2016
rs1056441	rs1056441	chr20:62370349	chr20:63738996	C/T	Sum neutrophil eosinophil counts	EFO_0004586	Astle W	27863252	European	2016	0.0185	0.003816	1.25e-06	+	173480	2	IVNT	Astle-W_Blood-Cell-Traits_EUR_2016
rs1056441	rs1056441	chr20:62370349	chr20:63738996	C/T	Hip circumference	EFO_0005093	Neale B	UKBB	European	2017	0.01235	0.002547	1.25e-06	+	336601	1	IVNT	Neale-B_UKBB_EUR_2017
rs1056441	rs1056441	chr20:62370349	chr20:63738996	C/T	Granulocyte count	EFO_0004586	Astle W	27863252	European	2016	0.01853	0.003826	1.27e-06	+	173480	2	IVNT	Astle-W_Blood-Cell-Traits_EUR_2016
rs1056441	rs1056441	chr20:62370349	chr20:63738996	C/T	Neutrophil percentage of white cells	EFO_0004586	Astle W	27863252	European	2016	0.0183	0.003778	1.28e-06	+	173480	2	IVNT	Astle-W_Blood-Cell-Traits_EUR_2016
rs1056441	rs1056441	chr20:62370349	chr20:63738996	C/T	Granulocyte count	EFO_0004586	Astle W	27863252	European	2016	0.01843	0.003806	1.28e-06	+	173480	2	IVNT	Astle-W_Blood-Cell-Traits_EUR_2016
rs1056441	rs1056441	chr20:62370349	chr20:63738996	C/T	Neutrophil count	EFO_0004586	Astle W	27863252	European	2016	0.01845	0.00381	1.29e-06	+	173480	2	IVNT	Astle-W_Blood-Cell-Traits_EUR_2016
rs1056441	rs1056441	chr20:62370349	chr20:63738996	C/T	Neutrophil percentage of white cells	EFO_0004586	Astle W	27863252	European	2016	0.01836	0.003795	1.31e-06	+	173480	2	IVNT	Astle-W_Blood-Cell-Traits_EUR_2016
rs1056441	rs1056441	chr20:62370349	chr20:63738996	C/T	Sum basophil neutrophil counts	EFO_0004586	Astle W	27863252	European	2016	0.01848	0.003819	1.32e-06	+	173480	2	IVNT	Astle-W_Blood-Cell-Traits_EUR_2016
rs1056441	rs1056441	chr20:62370349	chr20:63738996	C/T	Platelet count	EFO_0004586	Astle W	27863252	European	2016	0.01865	0.003856	1.32e-06	+	173480	2	IVNT	Astle-W_Blood-Cell-Traits_EUR_2016
rs1056441	rs1056441	chr20:62370349	chr20:63738996	C/T	Myeloid white cell count	EFO_0004586	Astle W	27863252	European	2016	0.01856	0.003844	1.37e-06	+	173480	2	IVNT	Astle-W_Blood-Cell-Traits_EUR_2016
rs1056441	rs1056441	chr20:62370349	chr20:63738996	C/T	Neutrophil percentage of white cells	EFO_0004586	Astle W	27863252	European	2016	0.01831	0.003796	1.41e-06	+	173480	2	IVNT	Astle-W_Blood-Cell-Traits_EUR_2016
rs1056441	rs1056441	chr20:62370349	chr20:63738996	C/T	Arm fat mass left	-	Neale B	UKBB	European	2017	0.01215	0.002519	1.41e-06	+	331164	1	IVNT	Neale-B_UKBB_EUR_2017
rs1056441	rs1056441	chr20:62370349	chr20:63738996	C/T	Smoking status: current	EFO_0006527	Neale B	UKBB	European	2017	0.003741	0.0007762	1.44e-06	+	336024	1	risk diff	Neale-B_UKBB_EUR_2017
rs1056441	rs1056441	chr20:62370349	chr20:63738996	C/T	Sum neutrophil eosinophil counts	EFO_0004586	Astle W	27863252	European	2016	0.01838	0.003814	1.45e-06	+	173480	2	IVNT	Astle-W_Blood-Cell-Traits_EUR_2016
rs1056441	rs1056441	chr20:62370349	chr20:63738996	C/T	Platelet count	EFO_0004586	Astle W	27863252	European	2016	0.0186	0.00386	1.45e-06	+	173480	2	IVNT	Astle-W_Blood-Cell-Traits_EUR_2016
rs1056441	rs1056441	chr20:62370349	chr20:63738996	C/T	Sum basophil neutrophil counts	EFO_0004586	Astle W	27863252	European	2016	0.01839	0.003819	1.47e-06	+	173480	2	IVNT	Astle-W_Blood-Cell-Traits_EUR_2016
rs1056441	rs1056441	chr20:62370349	chr20:63738996	C/T	Lymphocyte percentage of white cells	EFO_0004586	Astle W	27863252	European	2016	-0.01891	0.003927	1.47e-06	-	173480	2	IVNT	Astle-W_Blood-Cell-Traits_EUR_2016
rs1056441	rs1056441	chr20:62370349	chr20:63738996	C/T	Neutrophil percentage of white cells	EFO_0004586	Astle W	27863252	European	2016	0.01828	0.003798	1.48e-06	+	173480	2	IVNT	Astle-W_Blood-Cell-Traits_EUR_2016
rs1056441	rs1056441	chr20:62370349	chr20:63738996	C/T	Arm fat mass right	-	Neale B	UKBB	European	2017	0.01211	0.002517	1.5e-06	+	331226	1	IVNT	Neale-B_UKBB_EUR_2017
rs1056441	rs1056441	chr20:62370349	chr20:63738996	C/T	Neutrophil percentage of white cells	EFO_0004586	Astle W	27863252	European	2016	0.01826	0.003797	1.52e-06	+	173480	2	IVNT	Astle-W_Blood-Cell-Traits_EUR_2016
rs1056441	rs1056441	chr20:62370349	chr20:63738996	C/T	Sum neutrophil eosinophil counts	EFO_0004586	Astle W	27863252	European	2016	0.01824	0.003793	1.52e-06	+	173480	2	IVNT	Astle-W_Blood-Cell-Traits_EUR_2016
rs1056441	rs1056441	chr20:62370349	chr20:63738996	C/T	Neutrophil percentage of white cells	EFO_0004586	Astle W	27863252	European	2016	0.01826	0.003798	1.53e-06	+	173480	2	IVNT	Astle-W_Blood-Cell-Traits_EUR_2016
rs1056441	rs1056441	chr20:62370349	chr20:63738996	C/T	Neutrophil percentage of white cells	EFO_0004586	Astle W	27863252	European	2016	0.01825	0.003796	1.54e-06	+	173480	2	IVNT	Astle-W_Blood-Cell-Traits_EUR_2016
rs1056441	rs1056441	chr20:62370349	chr20:63738996	C/T	Smoking status: current	EFO_0006527	Neale B	UKBB	European	2017	0.003728	0.0007762	1.56e-06	+	336024	1	risk diff	Neale-B_UKBB_EUR_2017
rs1056441	rs1056441	chr20:62370349	chr20:63738996	C/T	Platelet count	EFO_0004586	Astle W	27863252	European	2016	0.01853	0.003858	1.56e-06	+	173480	2	IVNT	Astle-W_Blood-Cell-Traits_EUR_2016
rs1056441	rs1056441	chr20:62370349	chr20:63738996	C/T	Platelet count	EFO_0004586	Astle W	27863252	European	2016	0.01852	0.003857	1.57e-06	+	173480	2	IVNT	Astle-W_Blood-Cell-Traits_EUR_2016
rs1056441	rs1056441	chr20:62370349	chr20:63738996	C/T	Platelet count	EFO_0004586	Astle W	27863252	European	2016	0.01852	0.003857	1.57e-06	+	173480	2	IVNT	Astle-W_Blood-Cell-Traits_EUR_2016
rs1056441	rs1056441	chr20:62370349	chr20:63738996	C/T	Platelet count	EFO_0004586	Astle W	27863252	European	2016	0.01853	0.003861	1.59e-06	+	173480	2	IVNT	Astle-W_Blood-Cell-Traits_EUR_2016
rs1056441	rs1056441	chr20:62370349	chr20:63738996	C/T	Platelet count	EFO_0004586	Astle W	27863252	European	2016	0.01851	0.003858	1.6e-06	+	173480	2	IVNT	Astle-W_Blood-Cell-Traits_EUR_2016
rs1056441	rs1056441	chr20:62370349	chr20:63738996	C/T	Sum neutrophil eosinophil counts	EFO_0004586	Astle W	27863252	European	2016	0.01829	0.003814	1.62e-06	+	173480	2	IVNT	Astle-W_Blood-Cell-Traits_EUR_2016
rs1056441	rs1056441	chr20:62370349	chr20:63738996	C/T	Arm fat percentage right	-	Neale B	UKBB	European	2017	0.00937	0.001954	1.62e-06	+	331249	1	IVNT	Neale-B_UKBB_EUR_2017
rs1056441	rs1056441	chr20:62370349	chr20:63738996	C/T	Neutrophil count	EFO_0004586	Astle W	27863252	European	2016	0.01828	0.003812	1.63e-06	+	173480	2	IVNT	Astle-W_Blood-Cell-Traits_EUR_2016
rs1056441	rs1056441	chr20:62370349	chr20:63738996	C/T	Sum neutrophil eosinophil counts	EFO_0004586	Astle W	27863252	European	2016	0.01834	0.003829	1.67e-06	+	173480	2	IVNT	Astle-W_Blood-Cell-Traits_EUR_2016
rs1056441	rs1056441	chr20:62370349	chr20:63738996	C/T	Arm fat percentage left	-	Neale B	UKBB	European	2017	0.009318	0.001946	1.69e-06	+	331198	1	IVNT	Neale-B_UKBB_EUR_2017
rs1056441	rs1056441	chr20:62370349	chr20:63738996	C/T	Neutrophil percentage of white cells	EFO_0004586	Astle W	27863252	European	2016	0.01819	0.003801	1.7e-06	+	173480	2	IVNT	Astle-W_Blood-Cell-Traits_EUR_2016
rs1056441	rs1056441	chr20:62370349	chr20:63738996	C/T	Sum basophil neutrophil counts	EFO_0004586	Astle W	27863252	European	2016	0.01829	0.003823	1.71e-06	+	173480	2	IVNT	Astle-W_Blood-Cell-Traits_EUR_2016
rs1056441	rs1056441	chr20:62370349	chr20:63738996	C/T	Platelet count	EFO_0004586	Astle W	27863252	European	2016	0.01863	0.003893	1.71e-06	+	173480	2	IVNT	Astle-W_Blood-Cell-Traits_EUR_2016
rs1056441	rs1056441	chr20:62370349	chr20:63738996	C/T	Arm fat percentage left	-	Neale B	UKBB	European	2017	0.009313	0.001946	1.72e-06	+	331198	1	IVNT	Neale-B_UKBB_EUR_2017
rs1056441	rs1056441	chr20:62370349	chr20:63738996	C/T	Platelet count	EFO_0004586	Astle W	27863252	European	2016	0.01845	0.003864	1.8e-06	+	173480	2	IVNT	Astle-W_Blood-Cell-Traits_EUR_2016
rs1056441	rs1056441	chr20:62370349	chr20:63738996	C/T	Arm fat percentage left	-	Neale B	UKBB	European	2017	0.009299	0.001949	1.84e-06	+	331198	1	IVNT	Neale-B_UKBB_EUR_2017
rs1056441	rs1056441	chr20:62370349	chr20:63738996	C/T	Arm fat percentage left	-	Neale B	UKBB	European	2017	0.009282	0.001946	1.85e-06	+	331198	1	IVNT	Neale-B_UKBB_EUR_2017
rs1056441	rs1056441	chr20:62370349	chr20:63738996	C/T	Sum neutrophil eosinophil counts	EFO_0004586	Astle W	27863252	European	2016	0.0182	0.00382	1.88e-06	+	173480	2	IVNT	Astle-W_Blood-Cell-Traits_EUR_2016
rs1056441	rs1056441	chr20:62370349	chr20:63738996	C/T	Arm fat percentage left	-	Neale B	UKBB	European	2017	0.009274	0.001946	1.88e-06	+	331198	1	IVNT	Neale-B_UKBB_EUR_2017
rs1056441	rs1056441	chr20:62370349	chr20:63738996	C/T	Neutrophil count	EFO_0004586	Astle W	27863252	European	2016	0.01815	0.003811	1.9e-06	+	173480	2	IVNT	Astle-W_Blood-Cell-Traits_EUR_2016
rs1056441	rs1056441	chr20:62370349	chr20:63738996	C/T	Sum neutrophil eosinophil counts	EFO_0004586	Astle W	27863252	European	2016	0.01817	0.003815	1.92e-06	+	173480	2	IVNT	Astle-W_Blood-Cell-Traits_EUR_2016
rs1056441	rs1056441	chr20:62370349	chr20:63738996	C/T	Sum neutrophil eosinophil counts	EFO_0004586	Astle W	27863252	European	2016	0.01816	0.003815	1.94e-06	+	173480	2	IVNT	Astle-W_Blood-Cell-Traits_EUR_2016
rs1056441	rs1056441	chr20:62370349	chr20:63738996	C/T	Platelet count	EFO_0004586	Astle W	27863252	European	2016	0.01849	0.003885	1.94e-06	+	173480	2	IVNT	Astle-W_Blood-Cell-Traits_EUR_2016
rs1056441	rs1056441	chr20:62370349	chr20:63738996	C/T	Arm fat percentage right	-	Neale B	UKBB	European	2017	0.0093	0.001954	1.94e-06	+	331249	1	IVNT	Neale-B_UKBB_EUR_2017
rs1056441	rs1056441	chr20:62370349	chr20:63738996	C/T	Platelet count	EFO_0004586	Astle W	27863252	European	2016	0.01846	0.00388	1.95e-06	+	173480	2	IVNT	Astle-W_Blood-Cell-Traits_EUR_2016
rs1056441	rs1056441	chr20:62370349	chr20:63738996	C/T	Waist circumference	EFO_0004342	Neale B	UKBB	European	2017	0.01083	0.002278	1.97e-06	+	336639	1	IVNT	Neale-B_UKBB_EUR_2017
rs1056441	rs1056441	chr20:62370349	chr20:63738996	C/T	Arm fat mass right	-	Neale B	UKBB	European	2017	0.01198	0.00252	1.98e-06	+	331226	1	IVNT	Neale-B_UKBB_EUR_2017
rs1056441	rs1056441	chr20:62370349	chr20:63738996	C/T	Platelet count	EFO_0004586	Astle W	27863252	European	2016	0.01844	0.003879	1.99e-06	+	173480	2	IVNT	Astle-W_Blood-Cell-Traits_EUR_2016
rs1056441	rs1056441	chr20:62370349	chr20:63738996	C/T	Sum basophil neutrophil counts	EFO_0004586	Astle W	27863252	European	2016	0.01808	0.003803	2e-06	+	173480	2	IVNT	Astle-W_Blood-Cell-Traits_EUR_2016
rs1056441	rs1056441	chr20:62370349	chr20:63738996	C/T	Allergic disease	EFO_0003785	Ferreira M	29083406	European	2017	0.029	0.0061	2.08e-06	+	360838	13	log OR	Ferreira-M_Allergic-Disease_EUR_2017
rs1056441	rs1056441	chr20:62370349	chr20:63738996	C/T	Neutrophil count	EFO_0004586	Astle W	27863252	European	2016	0.01798	0.003788	2.08e-06	+	173480	2	IVNT	Astle-W_Blood-Cell-Traits_EUR_2016
rs1056441	rs1056441	chr20:62370349	chr20:63738996	C/T	Arm fat percentage left	-	Neale B	UKBB	European	2017	0.009228	0.001946	2.11e-06	+	331198	1	IVNT	Neale-B_UKBB_EUR_2017
rs1056441	rs1056441	chr20:62370349	chr20:63738996	C/T	Sum neutrophil eosinophil counts	EFO_0004586	Astle W	27863252	European	2016	0.01808	0.003815	2.14e-06	+	173480	2	IVNT	Astle-W_Blood-Cell-Traits_EUR_2016
rs1056441	rs1056441	chr20:62370349	chr20:63738996	C/T	Platelet count	EFO_0004586	Astle W	27863252	European	2016	0.0184	0.003881	2.14e-06	+	173480	2	IVNT	Astle-W_Blood-Cell-Traits_EUR_2016
rs1056441	rs1056441	chr20:62370349	chr20:63738996	C/T	Neutrophil count	EFO_0004586	Astle W	27863252	European	2016	0.01806	0.003811	2.14e-06	+	173480	2	IVNT	Astle-W_Blood-Cell-Traits_EUR_2016
rs1056441	rs1056441	chr20:62370349	chr20:63738996	C/T	Allergic disease	EFO_0003785	Ferreira M	29083406	European	2017	0.029	0.0061	2.17e-06	+	360838	13	log OR	Ferreira-M_Allergic-Disease_EUR_2017
rs1056441	rs1056441	chr20:62370349	chr20:63738996	C/T	Platelet count	EFO_0004586	Astle W	27863252	European	2016	0.01837	0.003879	2.19e-06	+	173480	2	IVNT	Astle-W_Blood-Cell-Traits_EUR_2016
rs1056441	rs1056441	chr20:62370349	chr20:63738996	C/T	Sum neutrophil eosinophil counts	EFO_0004586	Astle W	27863252	European	2016	0.01807	0.003816	2.19e-06	+	173480	2	IVNT	Astle-W_Blood-Cell-Traits_EUR_2016
rs1056441	rs1056441	chr20:62370349	chr20:63738996	C/T	Allergic disease	EFO_0003785	Ferreira M	29083406	European	2017	0.029	0.0061	2.2e-06	+	360838	13	log OR	Ferreira-M_Allergic-Disease_EUR_2017
rs1056441	rs1056441	chr20:62370349	chr20:63738996	C/T	Platelet count	EFO_0004586	Astle W	27863252	European	2016	0.01836	0.00388	2.21e-06	+	173480	2	IVNT	Astle-W_Blood-Cell-Traits_EUR_2016
rs1056441	rs1056441	chr20:62370349	chr20:63738996	C/T	Platelet count	EFO_0004586	Astle W	27863252	European	2016	0.01835	0.003879	2.24e-06	+	173480	2	IVNT	Astle-W_Blood-Cell-Traits_EUR_2016
rs1056441	rs1056441	chr20:62370349	chr20:63738996	C/T	Smoking status: current	EFO_0006527	Neale B	UKBB	European	2017	0.0037	0.0007823	2.26e-06	+	336024	1	risk diff	Neale-B_UKBB_EUR_2017
rs1056441	rs1056441	chr20:62370349	chr20:63738996	C/T	Platelet count	EFO_0004586	Astle W	27863252	European	2016	0.01835	0.00388	2.26e-06	+	173480	2	IVNT	Astle-W_Blood-Cell-Traits_EUR_2016
rs1056441	rs1056441	chr20:62370349	chr20:63738996	C/T	Allergic disease	EFO_0003785	Ferreira M	29083406	European	2017	0.0291	0.0061	2.29e-06	+	360838	13	log OR	Ferreira-M_Allergic-Disease_EUR_2017
rs1056441	rs1056441	chr20:62370349	chr20:63738996	C/T	Sum neutrophil eosinophil counts	EFO_0004586	Astle W	27863252	European	2016	0.01803	0.003816	2.31e-06	+	173480	2	IVNT	Astle-W_Blood-Cell-Traits_EUR_2016
rs1056441	rs1056441	chr20:62370349	chr20:63738996	C/T	Granulocyte count	EFO_0004586	Astle W	27863252	European	2016	0.01809	0.00383	2.32e-06	+	173480	2	IVNT	Astle-W_Blood-Cell-Traits_EUR_2016
rs1056441	rs1056441	chr20:62370349	chr20:63738996	C/T	Neutrophil count	EFO_0004586	Astle W	27863252	European	2016	0.01807	0.003825	2.33e-06	+	173480	2	IVNT	Astle-W_Blood-Cell-Traits_EUR_2016
rs1056441	rs1056441	chr20:62370349	chr20:63738996	C/T	Allergic disease	EFO_0003785	Ferreira M	29083406	European	2017	0.029	0.0061	2.35e-06	+	360838	13	log OR	Ferreira-M_Allergic-Disease_EUR_2017
rs1056441	rs1056441	chr20:62370349	chr20:63738996	C/T	Neutrophil percentage of white cells	EFO_0004586	Astle W	27863252	European	2016	0.01785	0.003781	2.35e-06	+	173480	2	IVNT	Astle-W_Blood-Cell-Traits_EUR_2016
rs1056441	rs1056441	chr20:62370349	chr20:63738996	C/T	Myeloid white cell count	EFO_0004586	Astle W	27863252	European	2016	0.01816	0.003849	2.37e-06	+	173480	2	IVNT	Astle-W_Blood-Cell-Traits_EUR_2016
rs1056441	rs1056441	chr20:62370349	chr20:63738996	C/T	Weight	EFO_0004338	Neale B	UKBB	European	2017	0.0106	0.002247	2.38e-06	+	336227	1	IVNT	Neale-B_UKBB_EUR_2017
rs1056441	rs1056441	chr20:62370349	chr20:63738996	C/T	Neutrophil count	EFO_0004586	Astle W	27863252	European	2016	0.018	0.003816	2.39e-06	+	173480	2	IVNT	Astle-W_Blood-Cell-Traits_EUR_2016
rs1056441	rs1056441	chr20:62370349	chr20:63738996	C/T	Platelet count	EFO_0004586	Astle W	27863252	European	2016	0.01828	0.003881	2.46e-06	+	173480	2	IVNT	Astle-W_Blood-Cell-Traits_EUR_2016
rs1056441	rs1056441	chr20:62370349	chr20:63738996	C/T	Weight	EFO_0004338	Neale B	UKBB	European	2017	0.01058	0.002247	2.51e-06	+	336227	1	IVNT	Neale-B_UKBB_EUR_2017
rs1056441	rs1056441	chr20:62370349	chr20:63738996	C/T	Neutrophil count	EFO_0004586	Astle W	27863252	European	2016	0.01794	0.003812	2.52e-06	+	173480	2	IVNT	Astle-W_Blood-Cell-Traits_EUR_2016
rs1056441	rs1056441	chr20:62370349	chr20:63738996	C/T	Neutrophil count	EFO_0004586	Astle W	27863252	European	2016	0.01793	0.003811	2.54e-06	+	173480	2	IVNT	Astle-W_Blood-Cell-Traits_EUR_2016
rs1056441	rs1056441	chr20:62370349	chr20:63738996	C/T	Allergic disease	EFO_0003785	Ferreira M	29083406	European	2017	0.0288	0.0061	2.56e-06	+	360838	13	log OR	Ferreira-M_Allergic-Disease_EUR_2017
rs1056441	rs1056441	chr20:62370349	chr20:63738996	C/T	Platelet count	EFO_0004586	Astle W	27863252	European	2016	0.01824	0.00388	2.58e-06	+	173480	2	IVNT	Astle-W_Blood-Cell-Traits_EUR_2016
rs1056441	rs1056441	chr20:62370349	chr20:63738996	C/T	Sum neutrophil eosinophil counts	EFO_0004586	Astle W	27863252	European	2016	0.01794	0.003816	2.58e-06	+	173480	2	IVNT	Astle-W_Blood-Cell-Traits_EUR_2016
rs1056441	rs1056441	chr20:62370349	chr20:63738996	C/T	Smoking status: current	EFO_0006527	Neale B	UKBB	European	2017	0.003671	0.0007808	2.58e-06	+	336024	1	risk diff	Neale-B_UKBB_EUR_2017
rs1056441	rs1056441	chr20:62370349	chr20:63738996	C/T	Smoking status: current	EFO_0006527	Neale B	UKBB	European	2017	0.003669	0.0007809	2.63e-06	+	336024	1	risk diff	Neale-B_UKBB_EUR_2017
rs1056441	rs1056441	chr20:62370349	chr20:63738996	C/T	Platelet count	EFO_0004586	Astle W	27863252	European	2016	0.01822	0.003881	2.66e-06	+	173480	2	IVNT	Astle-W_Blood-Cell-Traits_EUR_2016
rs1056441	rs1056441	chr20:62370349	chr20:63738996	C/T	Allergic disease	EFO_0003785	Ferreira M	29083406	European	2017	0.0289	0.0062	2.68e-06	+	360838	13	log OR	Ferreira-M_Allergic-Disease_EUR_2017
rs1056441	rs1056441	chr20:62370349	chr20:63738996	C/T	Allergic disease	EFO_0003785	Ferreira M	29083406	European	2017	0.0287	0.0061	2.7e-06	+	360838	13	log OR	Ferreira-M_Allergic-Disease_EUR_2017
rs1056441	rs1056441	chr20:62370349	chr20:63738996	C/T	Smoking status: current	EFO_0006527	Neale B	UKBB	European	2017	0.003664	0.000781	2.72e-06	+	336024	1	risk diff	Neale-B_UKBB_EUR_2017
rs1056441	rs1056441	chr20:62370349	chr20:63738996	C/T	Allergic disease	EFO_0003785	Ferreira M	29083406	European	2017	0.0287	0.0061	2.78e-06	+	360838	13	log OR	Ferreira-M_Allergic-Disease_EUR_2017
rs1056441	rs1056441	chr20:62370349	chr20:63738996	C/T	Leg fat mass left	-	Neale B	UKBB	European	2017	0.00992	0.002117	2.79e-06	+	331275	1	IVNT	Neale-B_UKBB_EUR_2017
rs1056441	rs1056441	chr20:62370349	chr20:63738996	C/T	Weight	EFO_0004338	Neale B	UKBB	European	2017	0.01053	0.002247	2.8e-06	+	336227	1	IVNT	Neale-B_UKBB_EUR_2017
rs1056441	rs1056441	chr20:62370349	chr20:63738996	C/T	Weight	EFO_0004338	Neale B	UKBB	European	2017	0.01052	0.002247	2.84e-06	+	336227	1	IVNT	Neale-B_UKBB_EUR_2017
rs1056441	rs1056441	chr20:62370349	chr20:63738996	C/T	Neutrophil count	EFO_0004586	Astle W	27863252	European	2016	0.01784	0.003811	2.85e-06	+	173480	2	IVNT	Astle-W_Blood-Cell-Traits_EUR_2016
rs1056441	rs1056441	chr20:62370349	chr20:63738996	C/T	No blood clot, bronchitis, emphysema, asthma, rhinitis, eczema or allergy diagnosed by doctor	-	Neale B	UKBB	European	2017	-0.005873	0.001255	2.85e-06	-	336782	1	risk diff	Neale-B_UKBB_EUR_2017
rs1056441	rs1056441	chr20:62370349	chr20:63738996	C/T	Neutrophil count	EFO_0004586	Astle W	27863252	European	2016	0.01773	0.00379	2.88e-06	+	173480	2	IVNT	Astle-W_Blood-Cell-Traits_EUR_2016
rs1056441	rs1056441	chr20:62370349	chr20:63738996	C/T	Neutrophil percentage of white cells	EFO_0004586	Astle W	27863252	European	2016	0.01784	0.003814	2.9e-06	+	173480	2	IVNT	Astle-W_Blood-Cell-Traits_EUR_2016
rs1056441	rs1056441	chr20:62370349	chr20:63738996	C/T	Neutrophil count	EFO_0004586	Astle W	27863252	European	2016	0.01783	0.003813	2.91e-06	+	173480	2	IVNT	Astle-W_Blood-Cell-Traits_EUR_2016
rs1056441	rs1056441	chr20:62370349	chr20:63738996	C/T	Platelet count	EFO_0004586	Astle W	27863252	European	2016	0.01821	0.003898	2.98e-06	+	173480	2	IVNT	Astle-W_Blood-Cell-Traits_EUR_2016
rs1056441	rs1056441	chr20:62370349	chr20:63738996	C/T	Allergic disease	EFO_0003785	Ferreira M	29083406	European	2017	0.0288	0.0062	3.01e-06	+	360838	13	log OR	Ferreira-M_Allergic-Disease_EUR_2017
rs1056441	rs1056441	chr20:62370349	chr20:63738996	C/T	Platelet count	EFO_0004586	Astle W	27863252	European	2016	0.01817	0.003894	3.08e-06	+	173480	2	IVNT	Astle-W_Blood-Cell-Traits_EUR_2016
rs1056441	rs1056441	chr20:62370349	chr20:63738996	C/T	Hayfever, allergic rhinitis or eczema	EFO_0003956;EFO_0005854;EFO_0000274	Neale B	UKBB	European	2017	0.005071	0.001087	3.09e-06	+	336782	1	risk diff	Neale-B_UKBB_EUR_2017
rs1056441	rs1056441	chr20:62370349	chr20:63738996	C/T	Smoking status: current	EFO_0006527	Neale B	UKBB	European	2017	0.003641	0.0007808	3.11e-06	+	336024	1	risk diff	Neale-B_UKBB_EUR_2017
rs1056441	rs1056441	chr20:62370349	chr20:63738996	C/T	Sum neutrophil eosinophil counts	EFO_0004586	Astle W	27863252	European	2016	0.01771	0.0038	3.13e-06	+	173480	2	IVNT	Astle-W_Blood-Cell-Traits_EUR_2016
rs1056441	rs1056441	chr20:62370349	chr20:63738996	C/T	Smoking status: current	EFO_0006527	Neale B	UKBB	European	2017	0.00364	0.0007808	3.15e-06	+	336024	1	risk diff	Neale-B_UKBB_EUR_2017
rs1056441	rs1056441	chr20:62370349	chr20:63738996	C/T	Granulocyte count	EFO_0004586	Astle W	27863252	European	2016	0.01787	0.003834	3.15e-06	+	173480	2	IVNT	Astle-W_Blood-Cell-Traits_EUR_2016
rs1056441	rs1056441	chr20:62370349	chr20:63738996	C/T	Neutrophil count	EFO_0004586	Astle W	27863252	European	2016	0.01777	0.003813	3.16e-06	+	173480	2	IVNT	Astle-W_Blood-Cell-Traits_EUR_2016
rs1056441	rs1056441	chr20:62370349	chr20:63738996	C/T	Sum neutrophil eosinophil counts	EFO_0004586	Astle W	27863252	European	2016	0.0178	0.00382	3.16e-06	+	173480	2	IVNT	Astle-W_Blood-Cell-Traits_EUR_2016
rs1056441	rs1056441	chr20:62370349	chr20:63738996	C/T	Smoking status: current	EFO_0006527	Neale B	UKBB	European	2017	0.003637	0.0007808	3.2e-06	+	336024	1	risk diff	Neale-B_UKBB_EUR_2017
rs1056441	rs1056441	chr20:62370349	chr20:63738996	C/T	Smoking status: current	EFO_0006527	Neale B	UKBB	European	2017	0.003637	0.0007808	3.2e-06	+	336024	1	risk diff	Neale-B_UKBB_EUR_2017
rs1056441	rs1056441	chr20:62370349	chr20:63738996	C/T	Sum basophil neutrophil counts	EFO_0004586	Astle W	27863252	European	2016	0.01783	0.003827	3.2e-06	+	173480	2	IVNT	Astle-W_Blood-Cell-Traits_EUR_2016
rs1056441	rs1056441	chr20:62370349	chr20:63738996	C/T	Weight	EFO_0004338	Neale B	UKBB	European	2017	0.01047	0.00225	3.26e-06	+	336227	1	IVNT	Neale-B_UKBB_EUR_2017
rs1056441	rs1056441	chr20:62370349	chr20:63738996	C/T	Arm fat percentage left	-	Neale B	UKBB	European	2017	0.009045	0.001945	3.3e-06	+	331198	1	IVNT	Neale-B_UKBB_EUR_2017
rs1056441	rs1056441	chr20:62370349	chr20:63738996	C/T	Smoking status: current	EFO_0006527	Neale B	UKBB	European	2017	0.003631	0.0007808	3.32e-06	+	336024	1	risk diff	Neale-B_UKBB_EUR_2017
rs1056441	rs1056441	chr20:62370349	chr20:63738996	C/T	Neutrophil count	EFO_0004586	Astle W	27863252	European	2016	0.0177	0.003813	3.45e-06	+	173480	2	IVNT	Astle-W_Blood-Cell-Traits_EUR_2016
rs1056441	rs1056441	chr20:62370349	chr20:63738996	C/T	Allergic disease	EFO_0003785	Ferreira M	29083406	European	2017	0.0286	0.0062	3.45e-06	+	360838	13	log OR	Ferreira-M_Allergic-Disease_EUR_2017
rs1056441	rs1056441	chr20:62370349	chr20:63738996	C/T	Arm fat percentage right	-	Neale B	UKBB	European	2017	0.009078	0.001956	3.45e-06	+	331249	1	IVNT	Neale-B_UKBB_EUR_2017
rs1056441	rs1056441	chr20:62370349	chr20:63738996	C/T	Weight	EFO_0004338	Neale B	UKBB	European	2017	0.01043	0.002246	3.47e-06	+	336227	1	IVNT	Neale-B_UKBB_EUR_2017
rs1056441	rs1056441	chr20:62370349	chr20:63738996	C/T	Smoking status: current	EFO_0006527	Neale B	UKBB	European	2017	0.003623	0.0007814	3.55e-06	+	336024	1	risk diff	Neale-B_UKBB_EUR_2017
rs1056441	rs1056441	chr20:62370349	chr20:63738996	C/T	Arm fat mass left	-	Neale B	UKBB	European	2017	0.01166	0.002518	3.66e-06	+	331164	1	IVNT	Neale-B_UKBB_EUR_2017
rs1056441	rs1056441	chr20:62370349	chr20:63738996	C/T	Neutrophil percentage of white cells	EFO_0004586	Astle W	27863252	European	2016	0.01761	0.003806	3.72e-06	+	173480	2	IVNT	Astle-W_Blood-Cell-Traits_EUR_2016
rs1056441	rs1056441	chr20:62370349	chr20:63738996	C/T	Smoking status: current	EFO_0006527	Neale B	UKBB	European	2017	0.003613	0.0007813	3.76e-06	+	336024	1	risk diff	Neale-B_UKBB_EUR_2017
rs1056441	rs1056441	chr20:62370349	chr20:63738996	C/T	Smoking status: current	EFO_0006527	Neale B	UKBB	European	2017	0.003611	0.0007816	3.83e-06	+	336024	1	risk diff	Neale-B_UKBB_EUR_2017
rs1056441	rs1056441	chr20:62370349	chr20:63738996	C/T	Platelet count	EFO_0004586	Astle W	27863252	European	2016	0.01795	0.003885	3.85e-06	+	173480	2	IVNT	Astle-W_Blood-Cell-Traits_EUR_2016
rs1056441	rs1056441	chr20:62370349	chr20:63738996	C/T	Allergic disease	EFO_0003785	Ferreira M	29083406	European	2017	0.0284	0.0062	3.89e-06	+	360838	13	log OR	Ferreira-M_Allergic-Disease_EUR_2017
rs1056441	rs1056441	chr20:62370349	chr20:63738996	C/T	Platelet count	EFO_0004586	Astle W	27863252	European	2016	0.01795	0.003889	3.92e-06	+	173480	2	IVNT	Astle-W_Blood-Cell-Traits_EUR_2016
rs1056441	rs1056441	chr20:62370349	chr20:63738996	C/T	Granulocyte count	EFO_0004586	Astle W	27863252	European	2016	0.01769	0.003839	4.05e-06	+	173480	2	IVNT	Astle-W_Blood-Cell-Traits_EUR_2016
rs1056441	rs1056441	chr20:62370349	chr20:63738996	C/T	Arm fat percentage left	-	Neale B	UKBB	European	2017	0.008961	0.001945	4.07e-06	+	331198	1	IVNT	Neale-B_UKBB_EUR_2017
rs1056441	rs1056441	chr20:62370349	chr20:63738996	C/T	Sum basophil neutrophil counts	EFO_0004586	Astle W	27863252	European	2016	0.01765	0.00383	4.07e-06	+	173480	2	IVNT	Astle-W_Blood-Cell-Traits_EUR_2016
rs1056441	rs1056441	chr20:62370349	chr20:63738996	C/T	Neutrophil count	EFO_0004586	Astle W	27863252	European	2016	0.01757	0.003816	4.16e-06	+	173480	2	IVNT	Astle-W_Blood-Cell-Traits_EUR_2016
rs1056441	rs1056441	chr20:62370349	chr20:63738996	C/T	Neutrophil percentage of white cells	EFO_0004586	Astle W	27863252	European	2016	0.01738	0.003777	4.17e-06	+	173480	2	IVNT	Astle-W_Blood-Cell-Traits_EUR_2016
rs1056441	rs1056441	chr20:62370349	chr20:63738996	C/T	Diastolic blood pressure	EFO_0006336	Neale B	UKBB	European	2017	0.01206	0.002625	4.34e-06	+	317756	1	IVNT	Neale-B_UKBB_EUR_2017
rs1056441	rs1056441	chr20:62370349	chr20:63738996	C/T	Arm fat mass left	-	Neale B	UKBB	European	2017	0.01155	0.002518	4.51e-06	+	331164	1	IVNT	Neale-B_UKBB_EUR_2017
rs1056441	rs1056441	chr20:62370349	chr20:63738996	C/T	Neutrophil count	EFO_0004586	Astle W	27863252	European	2016	0.0174	0.003796	4.58e-06	+	173480	2	IVNT	Astle-W_Blood-Cell-Traits_EUR_2016
rs1056441	rs1056441	chr20:62370349	chr20:63738996	C/T	Allergic disease	EFO_0003785	Ferreira M	29083406	European	2017	0.0281	0.0061	4.76e-06	+	360838	13	log OR	Ferreira-M_Allergic-Disease_EUR_2017
rs1056441	rs1056441	chr20:62370349	chr20:63738996	C/T	Time spent watching television	-	Neale B	UKBB	European	2017	0.009049	0.001978	4.76e-06	+	319740	1	-	Neale-B_UKBB_EUR_2017
rs1056441	rs1056441	chr20:62370349	chr20:63738996	C/T	Time spent watching television	-	Neale B	UKBB	European	2017	0.009045	0.001978	4.81e-06	+	319740	1	-	Neale-B_UKBB_EUR_2017
rs1056441	rs1056441	chr20:62370349	chr20:63738996	C/T	Sum basophil neutrophil counts	EFO_0004586	Astle W	27863252	European	2016	0.01749	0.003836	5.15e-06	+	173480	2	IVNT	Astle-W_Blood-Cell-Traits_EUR_2016
rs1056441	rs1056441	chr20:62370349	chr20:63738996	C/T	Diastolic blood pressure	EFO_0006336	Neale B	UKBB	European	2017	0.01193	0.002622	5.32e-06	+	317756	1	IVNT	Neale-B_UKBB_EUR_2017
rs1056441	rs1056441	chr20:62370349	chr20:63738996	C/T	Hayfever, allergic rhinitis or eczema	EFO_0003956;EFO_0005854;EFO_0000274	Neale B	UKBB	European	2017	0.004943	0.001086	5.34e-06	+	336782	1	risk diff	Neale-B_UKBB_EUR_2017
rs1056441	rs1056441	chr20:62370349	chr20:63738996	C/T	Diastolic blood pressure	EFO_0006336	Neale B	UKBB	European	2017	0.01186	0.002607	5.38e-06	+	317756	1	IVNT	Neale-B_UKBB_EUR_2017
rs1056441	rs1056441	chr20:62370349	chr20:63738996	C/T	Time spent watching television	-	Neale B	UKBB	European	2017	0.008994	0.001978	5.43e-06	+	319740	1	-	Neale-B_UKBB_EUR_2017
rs1056441	rs1056441	chr20:62370349	chr20:63738996	C/T	Time spent watching television	-	Neale B	UKBB	European	2017	0.008992	0.001978	5.49e-06	+	319740	1	-	Neale-B_UKBB_EUR_2017
rs1056441	rs1056441	chr20:62370349	chr20:63738996	C/T	Sum neutrophil eosinophil counts	EFO_0004586	Astle W	27863252	European	2016	0.01737	0.003824	5.55e-06	+	173480	2	IVNT	Astle-W_Blood-Cell-Traits_EUR_2016
rs1056441	rs1056441	chr20:62370349	chr20:63738996	C/T	Arm fat mass left	-	Neale B	UKBB	European	2017	0.01145	0.00252	5.56e-06	+	331164	1	IVNT	Neale-B_UKBB_EUR_2017
rs1056441	rs1056441	chr20:62370349	chr20:63738996	C/T	Diastolic blood pressure	EFO_0006336	Neale B	UKBB	European	2017	0.01184	0.002607	5.57e-06	+	317756	1	IVNT	Neale-B_UKBB_EUR_2017
rs1056441	rs1056441	chr20:62370349	chr20:63738996	C/T	Diastolic blood pressure	EFO_0006336	Neale B	UKBB	European	2017	0.01189	0.00262	5.66e-06	+	317756	1	IVNT	Neale-B_UKBB_EUR_2017
rs1056441	rs1056441	chr20:62370349	chr20:63738996	C/T	Diastolic blood pressure	EFO_0006336	Neale B	UKBB	European	2017	0.01183	0.002607	5.69e-06	+	317756	1	IVNT	Neale-B_UKBB_EUR_2017
rs1056441	rs1056441	chr20:62370349	chr20:63738996	C/T	Diastolic blood pressure	EFO_0006336	Neale B	UKBB	European	2017	0.01189	0.00262	5.7e-06	+	317756	1	IVNT	Neale-B_UKBB_EUR_2017
rs1056441	rs1056441	chr20:62370349	chr20:63738996	C/T	Diastolic blood pressure	EFO_0006336	Neale B	UKBB	European	2017	0.01188	0.00262	5.8e-06	+	317756	1	IVNT	Neale-B_UKBB_EUR_2017
rs1056441	rs1056441	chr20:62370349	chr20:63738996	C/T	Time spent watching television	-	Neale B	UKBB	European	2017	0.008963	0.001978	5.88e-06	+	319740	1	-	Neale-B_UKBB_EUR_2017
rs1056441	rs1056441	chr20:62370349	chr20:63738996	C/T	Diastolic blood pressure	EFO_0006336	Neale B	UKBB	European	2017	0.01188	0.002623	5.96e-06	+	317756	1	IVNT	Neale-B_UKBB_EUR_2017
rs1056441	rs1056441	chr20:62370349	chr20:63738996	C/T	Diastolic blood pressure	EFO_0006336	Neale B	UKBB	European	2017	0.01178	0.002606	6.22e-06	+	317756	1	IVNT	Neale-B_UKBB_EUR_2017
rs1056441	rs1056441	chr20:62370349	chr20:63738996	C/T	Time spent watching television	-	Neale B	UKBB	European	2017	0.009002	0.001992	6.23e-06	+	319740	1	-	Neale-B_UKBB_EUR_2017
rs1056441	rs1056441	chr20:62370349	chr20:63738996	C/T	Diastolic blood pressure	EFO_0006336	Neale B	UKBB	European	2017	0.01183	0.00262	6.34e-06	+	317756	1	IVNT	Neale-B_UKBB_EUR_2017
rs1056441	rs1056441	chr20:62370349	chr20:63738996	C/T	Hayfever, allergic rhinitis or eczema	EFO_0003956;EFO_0005854;EFO_0000274	Neale B	UKBB	European	2017	0.004914	0.001089	6.35e-06	+	336782	1	risk diff	Neale-B_UKBB_EUR_2017
rs1056441	rs1056441	chr20:62370349	chr20:63738996	C/T	Diastolic blood pressure	EFO_0006336	Neale B	UKBB	European	2017	0.01184	0.002622	6.39e-06	+	317756	1	IVNT	Neale-B_UKBB_EUR_2017
rs1056441	rs1056441	chr20:62370349	chr20:63738996	C/T	Diastolic blood pressure	EFO_0006336	Neale B	UKBB	European	2017	0.01182	0.00262	6.47e-06	+	317756	1	IVNT	Neale-B_UKBB_EUR_2017
rs1056441	rs1056441	chr20:62370349	chr20:63738996	C/T	Diastolic blood pressure	EFO_0006336	Neale B	UKBB	European	2017	0.01176	0.002606	6.49e-06	+	317756	1	IVNT	Neale-B_UKBB_EUR_2017
rs1056441	rs1056441	chr20:62370349	chr20:63738996	C/T	Diastolic blood pressure	EFO_0006336	Neale B	UKBB	European	2017	0.01181	0.00262	6.58e-06	+	317756	1	IVNT	Neale-B_UKBB_EUR_2017
rs1056441	rs1056441	chr20:62370349	chr20:63738996	C/T	Hayfever, allergic rhinitis or eczema	EFO_0003956;EFO_0005854;EFO_0000274	Neale B	UKBB	European	2017	0.004894	0.001086	6.62e-06	+	336782	1	risk diff	Neale-B_UKBB_EUR_2017
rs1056441	rs1056441	chr20:62370349	chr20:63738996	C/T	Diastolic blood pressure	EFO_0006336	Neale B	UKBB	European	2017	0.0118	0.002621	6.71e-06	+	317756	1	IVNT	Neale-B_UKBB_EUR_2017
rs1056441	rs1056441	chr20:62370349	chr20:63738996	C/T	Time spent watching television	-	Neale B	UKBB	European	2017	0.008953	0.001988	6.72e-06	+	319740	1	-	Neale-B_UKBB_EUR_2017
rs1056441	rs1056441	chr20:62370349	chr20:63738996	C/T	Time spent watching television	-	Neale B	UKBB	European	2017	0.008949	0.00199	6.93e-06	+	319740	1	-	Neale-B_UKBB_EUR_2017
rs1056441	rs1056441	chr20:62370349	chr20:63738996	C/T	Time spent watching television	-	Neale B	UKBB	European	2017	0.008931	0.00199	7.2e-06	+	319740	1	-	Neale-B_UKBB_EUR_2017
rs1056441	rs1056441	chr20:62370349	chr20:63738996	C/T	Plateletcrit	EFO_0004586	Astle W	27863252	European	2016	0.01806	0.004031	7.45e-06	+	173480	2	IVNT	Astle-W_Blood-Cell-Traits_EUR_2016
rs1056441	rs1056441	chr20:62370349	chr20:63738996	C/T	Neutrophil count	EFO_0004586	Astle W	27863252	European	2016	0.01712	0.003821	7.48e-06	+	173480	2	IVNT	Astle-W_Blood-Cell-Traits_EUR_2016
rs1056441	rs1056441	chr20:62370349	chr20:63738996	C/T	Time spent watching television	-	Neale B	UKBB	European	2017	0.008904	0.001989	7.57e-06	+	319740	1	-	Neale-B_UKBB_EUR_2017
rs1056441	rs1056441	chr20:62370349	chr20:63738996	C/T	Arm fat percentage left	-	Neale B	UKBB	European	2017	0.008709	0.001946	7.68e-06	+	331198	1	IVNT	Neale-B_UKBB_EUR_2017
rs1056441	rs1056441	chr20:62370349	chr20:63738996	C/T	Time spent watching television	-	Neale B	UKBB	European	2017	0.008894	0.001988	7.72e-06	+	319740	1	-	Neale-B_UKBB_EUR_2017
rs1056441	rs1056441	chr20:62370349	chr20:63738996	C/T	Time spent watching television	-	Neale B	UKBB	European	2017	0.008891	0.00199	7.87e-06	+	319740	1	-	Neale-B_UKBB_EUR_2017
rs1056441	rs1056441	chr20:62370349	chr20:63738996	C/T	Diastolic blood pressure	EFO_0006336	Neale B	UKBB	European	2017	0.01165	0.002606	7.88e-06	+	317756	1	IVNT	Neale-B_UKBB_EUR_2017
rs1056441	rs1056441	chr20:62370349	chr20:63738996	C/T	Pediatric Crohns disease	NCIT_C2965	Kugathasan S	18758464	European	2008	NA	NA	7.9e-06	NA	5261	-	-	GRASP
rs1056441	rs1056441	chr20:62370349	chr20:63738996	C/T	Sum neutrophil eosinophil counts	EFO_0004586	Astle W	27863252	European	2016	0.01709	0.003827	7.96e-06	+	173480	2	IVNT	Astle-W_Blood-Cell-Traits_EUR_2016
rs1056441	rs1056441	chr20:62370349	chr20:63738996	C/T	Pediatric Crohns disease	NCIT_C2965	Kugathasan S	18758464	European	2008	NA	NA	8.03e-06	NA	5261	-	-	GRASP
rs1056441	rs1056441	chr20:62370349	chr20:63738996	C/T	Diastolic blood pressure	EFO_0006336	Neale B	UKBB	European	2017	0.01169	0.002621	8.15e-06	+	317756	1	IVNT	Neale-B_UKBB_EUR_2017
rs1056441	rs1056441	chr20:62370349	chr20:63738996	C/T	Irritible bowel syndrome	EFO_0000555	Barrett JC	18587394	European	2008	NA	NA	8.29e-06	NA	8059	-	-	GRASP
rs1056441	rs1056441	chr20:62370349	chr20:63738996	C/T	Irritible bowel syndrome	EFO_0000555	Barrett JC	18587394	European	2008	NA	NA	8.41e-06	NA	8059	-	-	GRASP
rs1056441	rs1056441	chr20:62370349	chr20:63738996	C/T	Time spent watching television	-	Neale B	UKBB	European	2017	0.008857	0.001989	8.44e-06	+	319740	1	-	Neale-B_UKBB_EUR_2017
rs1056441	rs1056441	chr20:62370349	chr20:63738996	C/T	Time spent watching television	-	Neale B	UKBB	European	2017	0.008855	0.001989	8.47e-06	+	319740	1	-	Neale-B_UKBB_EUR_2017
rs1056441	rs1056441	chr20:62370349	chr20:63738996	C/T	Time spent watching television	-	Neale B	UKBB	European	2017	0.008851	0.001989	8.55e-06	+	319740	1	-	Neale-B_UKBB_EUR_2017
rs1056441	rs1056441	chr20:62370349	chr20:63738996	C/T	Diastolic blood pressure	EFO_0006336	Neale B	UKBB	European	2017	0.01162	0.002611	8.58e-06	+	317756	1	IVNT	Neale-B_UKBB_EUR_2017
rs1056441	rs1056441	chr20:62370349	chr20:63738996	C/T	Current tobacco smoking	EFO_0006527	Neale B	UKBB	European	2017	0.00648	0.001457	8.71e-06	+	337030	1	-	Neale-B_UKBB_EUR_2017
rs1056441	rs1056441	chr20:62370349	chr20:63738996	C/T	Time spent watching television	-	Neale B	UKBB	European	2017	0.008821	0.001989	9.21e-06	+	319740	1	-	Neale-B_UKBB_EUR_2017
rs1056441	rs1056441	chr20:62370349	chr20:63738996	C/T	Hayfever, allergic rhinitis or eczema	EFO_0003956;EFO_0005854;EFO_0000274	Neale B	UKBB	European	2017	0.004818	0.001087	9.29e-06	+	336782	1	risk diff	Neale-B_UKBB_EUR_2017
rs1056441	rs1056441	chr20:62370349	chr20:63738996	C/T	Time spent watching television	-	Neale B	UKBB	European	2017	0.008814	0.001988	9.32e-06	+	319740	1	-	Neale-B_UKBB_EUR_2017
rs1056441	rs1056441	chr20:62370349	chr20:63738996	C/T	Hayfever, allergic rhinitis or eczema	EFO_0003956;EFO_0005854;EFO_0000274	Neale B	UKBB	European	2017	0.004815	0.001087	9.4e-06	+	336782	1	risk diff	Neale-B_UKBB_EUR_2017
rs1056441	rs1056441	chr20:62370349	chr20:63738996	C/T	Hayfever, allergic rhinitis or eczema	EFO_0003956;EFO_0005854;EFO_0000274	Neale B	UKBB	European	2017	0.004812	0.001087	9.53e-06	+	336782	1	risk diff	Neale-B_UKBB_EUR_2017
rs1056441	rs1056441	chr20:62370349	chr20:63738996	C/T	Time spent watching television	-	Neale B	UKBB	European	2017	0.008765	0.001981	9.69e-06	+	319740	1	-	Neale-B_UKBB_EUR_2017
rs1056441	rs1056441	chr20:62370349	chr20:63738996	C/T	Time spent watching television	-	Neale B	UKBB	European	2017	0.008742	0.001977	9.74e-06	+	319740	1	-	Neale-B_UKBB_EUR_2017
rs1056441	rs1056441	chr20:62370349	chr20:63738996	C/T	Sum neutrophil eosinophil counts	EFO_0004586	Astle W	27863252	European	2016	0.01694	0.003833	9.84e-06	+	173480	2	IVNT	Astle-W_Blood-Cell-Traits_EUR_2016
rs1056441	rs1056441	chr20:62370349	chr20:63738996	C/T	Neutrophil count	EFO_0004586	Astle W	27863252	European	2016	0.01688	0.003824	1.01e-05	+	173480	2	IVNT	Astle-W_Blood-Cell-Traits_EUR_2016
rs1056441	rs1056441	chr20:62370349	chr20:63738996	C/T	Hayfever, allergic rhinitis or eczema	EFO_0003956;EFO_0005854;EFO_0000274	Neale B	UKBB	European	2017	0.004783	0.001087	1.08e-05	+	336782	1	risk diff	Neale-B_UKBB_EUR_2017
rs1056441	rs1056441	chr20:62370349	chr20:63738996	C/T	Leg fat mass right	-	Neale B	UKBB	European	2017	0.009416	0.002141	1.1e-05	+	331293	1	IVNT	Neale-B_UKBB_EUR_2017
rs1056441	rs1056441	chr20:62370349	chr20:63738996	C/T	Weight	EFO_0004338	Neale B	UKBB	European	2017	0.009857	0.002245	1.13e-05	+	336227	1	IVNT	Neale-B_UKBB_EUR_2017
rs1056441	rs1056441	chr20:62370349	chr20:63738996	C/T	Neutrophil percentage of white cells	EFO_0004586	Astle W	27863252	European	2016	0.01673	0.003809	1.13e-05	+	173480	2	IVNT	Astle-W_Blood-Cell-Traits_EUR_2016
rs1056441	rs1056441	chr20:62370349	chr20:63738996	C/T	Neutrophil percentage of white cells	EFO_0004586	Astle W	27863252	European	2016	0.01651	0.003773	1.21e-05	+	173480	2	IVNT	Astle-W_Blood-Cell-Traits_EUR_2016
rs1056441	rs1056441	chr20:62370349	chr20:63738996	C/T	Neutrophil count	EFO_0004586	Astle W	27863252	European	2016	0.01675	0.003829	1.22e-05	+	173480	2	IVNT	Astle-W_Blood-Cell-Traits_EUR_2016
rs1056441	rs1056441	chr20:62370349	chr20:63738996	C/T	Time spent watching television	-	Neale B	UKBB	European	2017	0.008652	0.001978	1.22e-05	+	319740	1	-	Neale-B_UKBB_EUR_2017
rs1056441	rs1056441	chr20:62370349	chr20:63738996	C/T	Hayfever, allergic rhinitis or eczema	EFO_0003956;EFO_0005854;EFO_0000274	Neale B	UKBB	European	2017	0.004749	0.001087	1.25e-05	+	336782	1	risk diff	Neale-B_UKBB_EUR_2017
rs1056441	rs1056441	chr20:62370349	chr20:63738996	C/T	Neutrophil percentage of white cells	EFO_0004586	Astle W	27863252	European	2016	0.01648	0.003774	1.27e-05	+	173480	2	IVNT	Astle-W_Blood-Cell-Traits_EUR_2016
rs1056441	rs1056441	chr20:62370349	chr20:63738996	C/T	Weight	EFO_0004338	Neale B	UKBB	European	2017	0.009772	0.002245	1.35e-05	+	336227	1	IVNT	Neale-B_UKBB_EUR_2017
rs1056441	rs1056441	chr20:62370349	chr20:63738996	C/T	Irritible bowel syndrome	EFO_0000555	Barrett JC	18587394	European	2008	NA	NA	1.47e-05	NA	8059	-	-	GRASP
rs1056441	rs1056441	chr20:62370349	chr20:63738996	C/T	Myeloid white cell count	EFO_0004586	Astle W	27863252	European	2016	0.0172	0.003971	1.47e-05	+	173480	2	IVNT	Astle-W_Blood-Cell-Traits_EUR_2016
rs1056441	rs1056441	chr20:62370349	chr20:63738996	C/T	Hayfever, allergic rhinitis or eczema	EFO_0003956;EFO_0005854;EFO_0000274	Neale B	UKBB	European	2017	0.004725	0.001093	1.53e-05	+	336782	1	risk diff	Neale-B_UKBB_EUR_2017
rs1056441	rs1056441	chr20:62370349	chr20:63738996	C/T	Hayfever, allergic rhinitis or eczema	EFO_0003956;EFO_0005854;EFO_0000274	Neale B	UKBB	European	2017	0.004727	0.001093	1.54e-05	+	336782	1	risk diff	Neale-B_UKBB_EUR_2017
rs1056441	rs1056441	chr20:62370349	chr20:63738996	C/T	Time spent watching television	-	Neale B	UKBB	European	2017	0.008544	0.001977	1.54e-05	+	319740	1	-	Neale-B_UKBB_EUR_2017
rs1056441	rs1056441	chr20:62370349	chr20:63738996	C/T	Hayfever, allergic rhinitis or eczema	EFO_0003956;EFO_0005854;EFO_0000274	Neale B	UKBB	European	2017	0.004719	0.001093	1.57e-05	+	336782	1	risk diff	Neale-B_UKBB_EUR_2017
rs1056441	rs1056441	chr20:62370349	chr20:63738996	C/T	Hayfever, allergic rhinitis or eczema	EFO_0003956;EFO_0005854;EFO_0000274	Neale B	UKBB	European	2017	0.004718	0.001093	1.58e-05	+	336782	1	risk diff	Neale-B_UKBB_EUR_2017
rs1056441	rs1056441	chr20:62370349	chr20:63738996	C/T	Hayfever, allergic rhinitis or eczema	EFO_0003956;EFO_0005854;EFO_0000274	Neale B	UKBB	European	2017	0.004717	0.001093	1.58e-05	+	336782	1	risk diff	Neale-B_UKBB_EUR_2017
rs1056441	rs1056441	chr20:62370349	chr20:63738996	C/T	Weight	EFO_0004338	Neale B	UKBB	European	2017	0.009694	0.002247	1.6e-05	+	336227	1	IVNT	Neale-B_UKBB_EUR_2017
rs1056441	rs1056441	chr20:62370349	chr20:63738996	C/T	Hayfever, allergic rhinitis or eczema	EFO_0003956;EFO_0005854;EFO_0000274	Neale B	UKBB	European	2017	0.004706	0.001093	1.66e-05	+	336782	1	risk diff	Neale-B_UKBB_EUR_2017
rs1056441	rs1056441	chr20:62370349	chr20:63738996	C/T	Hayfever, allergic rhinitis or eczema	EFO_0003956;EFO_0005854;EFO_0000274	Neale B	UKBB	European	2017	0.004702	0.001093	1.68e-05	+	336782	1	risk diff	Neale-B_UKBB_EUR_2017
rs1056441	rs1056441	chr20:62370349	chr20:63738996	C/T	Hayfever, allergic rhinitis or eczema	EFO_0003956;EFO_0005854;EFO_0000274	Neale B	UKBB	European	2017	0.004697	0.001093	1.72e-05	+	336782	1	risk diff	Neale-B_UKBB_EUR_2017
rs1056441	rs1056441	chr20:62370349	chr20:63738996	C/T	Hayfever, allergic rhinitis or eczema	EFO_0003956;EFO_0005854;EFO_0000274	Neale B	UKBB	European	2017	0.004691	0.001093	1.77e-05	+	336782	1	risk diff	Neale-B_UKBB_EUR_2017
rs1056441	rs1056441	chr20:62370349	chr20:63738996	C/T	Asthma	EFO_0000270	Neale B	UKBB	European	2017	0.003522	0.0008231	1.88e-05	+	336782	1	risk diff	Neale-B_UKBB_EUR_2017
rs1056441	rs1056441	chr20:62370349	chr20:63738996	C/T	Hayfever, allergic rhinitis or eczema	EFO_0003956;EFO_0005854;EFO_0000274	Neale B	UKBB	European	2017	0.004669	0.001093	1.95e-05	+	336782	1	risk diff	Neale-B_UKBB_EUR_2017
rs1056441	rs1056441	chr20:62370349	chr20:63738996	C/T	Hayfever, allergic rhinitis or eczema	EFO_0003956;EFO_0005854;EFO_0000274	Neale B	UKBB	European	2017	0.004649	0.001094	2.13e-05	+	336782	1	risk diff	Neale-B_UKBB_EUR_2017
rs1056441	rs1056441	chr20:62370349	chr20:63738996	C/T	Granulocyte count	EFO_0004586	Astle W	27863252	European	2016	0.01679	0.00396	2.24e-05	+	173480	2	IVNT	Astle-W_Blood-Cell-Traits_EUR_2016
rs1056441	rs1056441	chr20:62370349	chr20:63738996	C/T	Asthma	EFO_0000270	Neale B	UKBB	European	2017	0.003488	0.0008231	2.26e-05	+	336782	1	risk diff	Neale-B_UKBB_EUR_2017
rs1056441	rs1056441	chr20:62370349	chr20:63738996	C/T	Diastolic blood pressure	EFO_0006336	Neale B	UKBB	European	2017	0.01093	0.002605	2.7e-05	+	317756	1	IVNT	Neale-B_UKBB_EUR_2017
rs1056441	rs1056441	chr20:62370349	chr20:63738996	C/T	Ulcerative colitis	EFO_0000729	IBDGC	23128233	European	2012	NA	NA	2.74e-05	NA	20672	8	log OR	IBDGC_Ulcerative-Colitis_EUR_2012
rs1056441	rs1056441	chr20:62370349	chr20:63738996	C/T	Hayfever, allergic rhinitis or eczema	EFO_0003956;EFO_0005854;EFO_0000274	Neale B	UKBB	European	2017	0.004551	0.001095	3.22e-05	+	336782	1	risk diff	Neale-B_UKBB_EUR_2017
rs1056441	rs1056441	chr20:62370349	chr20:63738996	C/T	Diastolic blood pressure	EFO_0006336	Neale B	UKBB	European	2017	0.01081	0.002605	3.33e-05	+	317756	1	IVNT	Neale-B_UKBB_EUR_2017
rs1056441	rs1056441	chr20:62370349	chr20:63738996	C/T	Sum basophil neutrophil counts	EFO_0004586	Astle W	27863252	European	2016	0.01641	0.003957	3.38e-05	+	173480	2	IVNT	Astle-W_Blood-Cell-Traits_EUR_2016
rs1056441	rs1056441	chr20:62370349	chr20:63738996	C/T	Ulcerative colitis	EFO_0000729	IBDGC	23128233	European	2012	NA	NA	3.45e-05	NA	20672	8	log OR	IBDGC_Ulcerative-Colitis_EUR_2012
rs1056441	rs1056441	chr20:62370349	chr20:63738996	C/T	Sum neutrophil eosinophil counts	EFO_0004586	Astle W	27863252	European	2016	0.0163	0.003953	3.72e-05	+	173480	2	IVNT	Astle-W_Blood-Cell-Traits_EUR_2016
rs1056441	rs1056441	chr20:62370349	chr20:63738996	C/T	Body mass index	EFO_0004340	Neale B	UKBB	European	2017	0.01056	0.002562	3.74e-05	+	336107	1	IVNT	Neale-B_UKBB_EUR_2017
rs1056441	rs1056441	chr20:62370349	chr20:63738996	C/T	Medication for pain relief, constipation, heartburn: omeprazole	EFO_0007056	Neale B	UKBB	European	2017	0.002552	0.0006201	3.86e-05	+	333581	1	risk diff	Neale-B_UKBB_EUR_2017
rs1056441	rs1056441	chr20:62370349	chr20:63738996	C/T	Asthma	EFO_0000270	Neale B	UKBB	European	2017	0.003385	0.0008238	3.99e-05	+	336782	1	risk diff	Neale-B_UKBB_EUR_2017
rs1056441	rs1056441	chr20:62370349	chr20:63738996	C/T	Smoking status: current	EFO_0006527	Neale B	UKBB	European	2017	0.003323	0.0008091	4e-05	+	336024	1	risk diff	Neale-B_UKBB_EUR_2017
rs1056441	rs1056441	chr20:62370349	chr20:63738996	C/T	Self-reported asthma	EFO_0000270	Neale B	UKBB	European	2017	0.003377	0.0008247	4.23e-05	+	337159	1	risk diff	Neale-B_UKBB_EUR_2017
rs1056441	rs1056441	chr20:62370349	chr20:63738996	C/T	Medication for pain relief, constipation, heartburn: omeprazole	EFO_0007056	Neale B	UKBB	European	2017	0.002538	0.00062	4.25e-05	+	333581	1	risk diff	Neale-B_UKBB_EUR_2017
rs1056441	rs1056441	chr20:62370349	chr20:63738996	C/T	Asthma	EFO_0000270	Neale B	UKBB	European	2017	0.003368	0.000825	4.45e-05	+	336782	1	risk diff	Neale-B_UKBB_EUR_2017
rs1056441	rs1056441	chr20:62370349	chr20:63738996	C/T	Allergic disease	EFO_0003785	Ferreira M	29083406	European	2017	0.0262	0.0064	4.75e-05	+	360838	13	log OR	Ferreira-M_Allergic-Disease_EUR_2017
rs1056441	rs1056441	chr20:62370349	chr20:63738996	C/T	Body mass index	EFO_0004340	Neale B	UKBB	European	2017	0.0104	0.002557	4.77e-05	+	336107	1	IVNT	Neale-B_UKBB_EUR_2017
rs1056441	rs1056441	chr20:62370349	chr20:63738996	C/T	Body mass index	EFO_0004340	Neale B	UKBB	European	2017	0.01041	0.00256	4.78e-05	+	336107	1	IVNT	Neale-B_UKBB_EUR_2017
rs1056441	rs1056441	chr20:62370349	chr20:63738996	C/T	Number of self-reported non-cancer illnesses	EFO_0009801	Neale B	UKBB	European	2017	0.008593	0.002122	5.15e-05	+	337159	1	-	Neale-B_UKBB_EUR_2017
rs1056441	rs1056441	chr20:62370349	chr20:63738996	C/T	Self-reported asthma	EFO_0000270	Neale B	UKBB	European	2017	0.003337	0.0008247	5.21e-05	+	337159	1	risk diff	Neale-B_UKBB_EUR_2017
rs1056441	rs1056441	chr20:62370349	chr20:63738996	C/T	Asthma	EFO_0000270	Neale B	UKBB	European	2017	0.003332	0.0008238	5.25e-05	+	336782	1	risk diff	Neale-B_UKBB_EUR_2017
rs1056441	rs1056441	chr20:62370349	chr20:63738996	C/T	Body mass index	EFO_0004340	Neale B	UKBB	European	2017	0.01034	0.002557	5.26e-05	+	336107	1	IVNT	Neale-B_UKBB_EUR_2017
rs1056441	rs1056441	chr20:62370349	chr20:63738996	C/T	Body mass index	EFO_0004340	Neale B	UKBB	European	2017	0.01035	0.002559	5.27e-05	+	336107	1	IVNT	Neale-B_UKBB_EUR_2017
rs1056441	rs1056441	chr20:62370349	chr20:63738996	C/T	Body mass index	EFO_0004340	Neale B	UKBB	European	2017	0.01034	0.002557	5.29e-05	+	336107	1	IVNT	Neale-B_UKBB_EUR_2017
rs1056441	rs1056441	chr20:62370349	chr20:63738996	C/T	Medication for pain relief, constipation, heartburn: omeprazole	EFO_0007056	Neale B	UKBB	European	2017	0.002508	0.0006206	5.31e-05	+	333581	1	risk diff	Neale-B_UKBB_EUR_2017
rs1056441	rs1056441	chr20:62370349	chr20:63738996	C/T	Body mass index	EFO_0004340	Neale B	UKBB	European	2017	0.01032	0.002557	5.45e-05	+	336107	1	IVNT	Neale-B_UKBB_EUR_2017
rs1056441	rs1056441	chr20:62370349	chr20:63738996	C/T	Body mass index	EFO_0004340	Neale B	UKBB	European	2017	0.01031	0.002557	5.57e-05	+	336107	1	IVNT	Neale-B_UKBB_EUR_2017
rs1056441	rs1056441	chr20:62370349	chr20:63738996	C/T	Body mass index	EFO_0004340	Neale B	UKBB	European	2017	0.0103	0.002559	5.66e-05	+	336107	1	IVNT	Neale-B_UKBB_EUR_2017
rs1056441	rs1056441	chr20:62370349	chr20:63738996	C/T	Pain type experienced in last month: pain all over the body	EFO_0003843	Neale B	UKBB	European	2017	0.00127	0.0003158	5.76e-05	+	336650	1	risk diff	Neale-B_UKBB_EUR_2017
rs1056441	rs1056441	chr20:62370349	chr20:63738996	C/T	Asthma	EFO_0000270	Neale B	UKBB	European	2017	0.003311	0.0008236	5.8e-05	+	336782	1	risk diff	Neale-B_UKBB_EUR_2017
rs1056441	rs1056441	chr20:62370349	chr20:63738996	C/T	Asthma	EFO_0000270	Neale B	UKBB	European	2017	0.003312	0.0008236	5.8e-05	+	336782	1	risk diff	Neale-B_UKBB_EUR_2017
rs1056441	rs1056441	chr20:62370349	chr20:63738996	C/T	Body mass index	EFO_0004340	Neale B	UKBB	European	2017	0.01028	0.002557	5.81e-05	+	336107	1	IVNT	Neale-B_UKBB_EUR_2017
rs1056441	rs1056441	chr20:62370349	chr20:63738996	C/T	Asthma	EFO_0000270	Neale B	UKBB	European	2017	0.00331	0.0008237	5.85e-05	+	336782	1	risk diff	Neale-B_UKBB_EUR_2017
rs1056441	rs1056441	chr20:62370349	chr20:63738996	C/T	Pain type experienced in last month: pain all over the body	EFO_0003843	Neale B	UKBB	European	2017	0.001265	0.0003152	5.97e-05	+	336650	1	risk diff	Neale-B_UKBB_EUR_2017
rs1056441	rs1056441	chr20:62370349	chr20:63738996	C/T	Medication for pain relief, constipation, heartburn: omeprazole	EFO_0007056	Neale B	UKBB	European	2017	0.002486	0.0006194	5.98e-05	+	333581	1	risk diff	Neale-B_UKBB_EUR_2017
rs1056441	rs1056441	chr20:62370349	chr20:63738996	C/T	Asthma	EFO_0000270	Neale B	UKBB	European	2017	0.003306	0.0008238	6e-05	+	336782	1	risk diff	Neale-B_UKBB_EUR_2017
rs1056441	rs1056441	chr20:62370349	chr20:63738996	C/T	Neutrophil count	EFO_0004586	Astle W	27863252	European	2016	0.01585	0.00395	6.01e-05	+	173480	2	IVNT	Astle-W_Blood-Cell-Traits_EUR_2016
rs1056441	rs1056441	chr20:62370349	chr20:63738996	C/T	Hip circumference	EFO_0005093	Neale B	UKBB	European	2017	0.01062	0.002652	6.2e-05	+	336601	1	IVNT	Neale-B_UKBB_EUR_2017
rs1056441	rs1056441	chr20:62370349	chr20:63738996	C/T	Body mass index	EFO_0004340	Neale B	UKBB	European	2017	0.01024	0.002557	6.21e-05	+	336107	1	IVNT	Neale-B_UKBB_EUR_2017
rs1056441	rs1056441	chr20:62370349	chr20:63738996	C/T	Hayfever, allergic rhinitis or eczema	EFO_0003956;EFO_0005854;EFO_0000274	Neale B	UKBB	European	2017	0.004532	0.001132	6.27e-05	+	336782	1	risk diff	Neale-B_UKBB_EUR_2017
rs1056441	rs1056441	chr20:62370349	chr20:63738996	C/T	Number of self-reported non-cancer illnesses	EFO_0009801	Neale B	UKBB	European	2017	0.008495	0.002122	6.28e-05	+	337159	1	-	Neale-B_UKBB_EUR_2017
rs1056441	rs1056441	chr20:62370349	chr20:63738996	C/T	Medication for pain relief, constipation, heartburn: omeprazole	EFO_0007056	Neale B	UKBB	European	2017	0.00248	0.0006198	6.32e-05	+	333581	1	risk diff	Neale-B_UKBB_EUR_2017
rs1056441	rs1056441	chr20:62370349	chr20:63738996	C/T	Medication for pain relief, constipation, heartburn: omeprazole	EFO_0007056	Neale B	UKBB	European	2017	0.002464	0.0006162	6.38e-05	+	333581	1	risk diff	Neale-B_UKBB_EUR_2017
rs1056441	rs1056441	chr20:62370349	chr20:63738996	C/T	Medication for pain relief, constipation, heartburn: omeprazole	EFO_0007056	Neale B	UKBB	European	2017	0.002463	0.0006162	6.41e-05	+	333581	1	risk diff	Neale-B_UKBB_EUR_2017
rs1056441	rs1056441	chr20:62370349	chr20:63738996	C/T	Medication for pain relief, constipation, heartburn: omeprazole	EFO_0007056	Neale B	UKBB	European	2017	0.002459	0.0006161	6.56e-05	+	333581	1	risk diff	Neale-B_UKBB_EUR_2017
rs1056441	rs1056441	chr20:62370349	chr20:63738996	C/T	Body mass index	EFO_0004340	Neale B	UKBB	European	2017	0.0102	0.002557	6.6e-05	+	336107	1	IVNT	Neale-B_UKBB_EUR_2017
rs1056441	rs1056441	chr20:62370349	chr20:63738996	C/T	Medication for pain relief, constipation, heartburn: omeprazole	EFO_0007056	Neale B	UKBB	European	2017	0.002459	0.0006163	6.62e-05	+	333581	1	risk diff	Neale-B_UKBB_EUR_2017
rs1056441	rs1056441	chr20:62370349	chr20:63738996	C/T	Usual walking pace	EFO_0008002	Neale B	UKBB	European	2017	-0.006306	0.001581	6.64e-05	-	335349	1	-	Neale-B_UKBB_EUR_2017
rs1056441	rs1056441	chr20:62370349	chr20:63738996	C/T	High grade glioma	NCIT_C4822	Wrensch M	19578366	European	2009	NA	NA	6.7e-05	NA	4684	-	-	GRASP
rs1056441	rs1056441	chr20:62370349	chr20:63738996	C/T	Number of self-reported non-cancer illnesses	EFO_0009801	Neale B	UKBB	European	2017	0.008466	0.002124	6.73e-05	+	337159	1	-	Neale-B_UKBB_EUR_2017
rs1056441	rs1056441	chr20:62370349	chr20:63738996	C/T	Pain type experienced in last month: pain all over the body	EFO_0003843	Neale B	UKBB	European	2017	0.001255	0.0003153	6.92e-05	+	336650	1	risk diff	Neale-B_UKBB_EUR_2017
rs1056441	rs1056441	chr20:62370349	chr20:63738996	C/T	Medication for pain relief, constipation, heartburn: omeprazole	EFO_0007056	Neale B	UKBB	European	2017	0.002465	0.0006196	6.96e-05	+	333581	1	risk diff	Neale-B_UKBB_EUR_2017
rs1056441	rs1056441	chr20:62370349	chr20:63738996	C/T	Pain type experienced in last month: pain all over the body	EFO_0003843	Neale B	UKBB	European	2017	0.001253	0.0003153	7.06e-05	+	336650	1	risk diff	Neale-B_UKBB_EUR_2017
rs1056441	rs1056441	chr20:62370349	chr20:63738996	C/T	Medication for pain relief, constipation, heartburn: omeprazole	EFO_0007056	Neale B	UKBB	European	2017	0.002551	0.0006419	7.06e-05	+	333581	1	risk diff	Neale-B_UKBB_EUR_2017
rs1056441	rs1056441	chr20:62370349	chr20:63738996	C/T	Pain type experienced in last month: pain all over the body	EFO_0003843	Neale B	UKBB	European	2017	0.001253	0.0003153	7.12e-05	+	336650	1	risk diff	Neale-B_UKBB_EUR_2017
rs1056441	rs1056441	chr20:62370349	chr20:63738996	C/T	Qualifications: college or university degree	EFO_0004784	Neale B	UKBB	European	2017	-0.004816	0.001213	7.18e-05	-	334070	1	risk diff	Neale-B_UKBB_EUR_2017
rs1056441	rs1056441	chr20:62370349	chr20:63738996	C/T	Pain type experienced in last month: pain all over the body	EFO_0003843	Neale B	UKBB	European	2017	0.001251	0.0003153	7.21e-05	+	336650	1	risk diff	Neale-B_UKBB_EUR_2017
rs1056441	rs1056441	chr20:62370349	chr20:63738996	C/T	Number of self-reported non-cancer illnesses	EFO_0009801	Neale B	UKBB	European	2017	0.008426	0.002124	7.3e-05	+	337159	1	-	Neale-B_UKBB_EUR_2017
rs1056441	rs1056441	chr20:62370349	chr20:63738996	C/T	Usual walking pace	EFO_0008002	Neale B	UKBB	European	2017	-0.006273	0.001582	7.35e-05	-	335349	1	-	Neale-B_UKBB_EUR_2017
rs1056441	rs1056441	chr20:62370349	chr20:63738996	C/T	Number of self-reported non-cancer illnesses	EFO_0009801	Neale B	UKBB	European	2017	0.008418	0.002124	7.38e-05	+	337159	1	-	Neale-B_UKBB_EUR_2017
rs1056441	rs1056441	chr20:62370349	chr20:63738996	C/T	Medication for pain relief, constipation, heartburn: omeprazole	EFO_0007056	Neale B	UKBB	European	2017	0.002441	0.0006163	7.47e-05	+	333581	1	risk diff	Neale-B_UKBB_EUR_2017
rs1056441	rs1056441	chr20:62370349	chr20:63738996	C/T	Qualifications: college or university degree	EFO_0004784	Neale B	UKBB	European	2017	-0.004771	0.001205	7.47e-05	-	334070	1	risk diff	Neale-B_UKBB_EUR_2017
rs1056441	rs1056441	chr20:62370349	chr20:63738996	C/T	Medication for pain relief, constipation, heartburn: omeprazole	EFO_0007056	Neale B	UKBB	European	2017	0.002451	0.0006195	7.63e-05	+	333581	1	risk diff	Neale-B_UKBB_EUR_2017
rs1056441	rs1056441	chr20:62370349	chr20:63738996	C/T	Qualifications: college or university degree	EFO_0004784	Neale B	UKBB	European	2017	-0.004762	0.001205	7.7e-05	-	334070	1	risk diff	Neale-B_UKBB_EUR_2017
rs1056441	rs1056441	chr20:62370349	chr20:63738996	C/T	Medication for pain relief, constipation, heartburn: omeprazole	EFO_0007056	Neale B	UKBB	European	2017	0.002448	0.0006195	7.76e-05	+	333581	1	risk diff	Neale-B_UKBB_EUR_2017
rs1056441	rs1056441	chr20:62370349	chr20:63738996	C/T	Qualifications: college or university degree	EFO_0004784	Neale B	UKBB	European	2017	-0.004754	0.001205	8.01e-05	-	334070	1	risk diff	Neale-B_UKBB_EUR_2017
rs1056441	rs1056441	chr20:62370349	chr20:63738996	C/T	Arm fat mass right	-	Neale B	UKBB	European	2017	0.01035	0.002624	8.06e-05	+	331226	1	IVNT	Neale-B_UKBB_EUR_2017
rs1056441	rs1056441	chr20:62370349	chr20:63738996	C/T	Monocyte count	EFO_0004586	Astle W	27863252	European	2016	0.01489	0.003779	8.12e-05	+	173480	2	IVNT	Astle-W_Blood-Cell-Traits_EUR_2016
rs1056441	rs1056441	chr20:62370349	chr20:63738996	C/T	Impedance of leg left	-	Neale B	UKBB	European	2017	0.009621	0.002442	8.16e-05	+	331296	1	IVNT	Neale-B_UKBB_EUR_2017
rs1056441	rs1056441	chr20:62370349	chr20:63738996	C/T	Medication for pain relief, constipation, heartburn: omeprazole	EFO_0007056	Neale B	UKBB	European	2017	0.002439	0.0006194	8.22e-05	+	333581	1	risk diff	Neale-B_UKBB_EUR_2017
rs1056441	rs1056441	chr20:62370349	chr20:63738996	C/T	Medication for pain relief, constipation, heartburn: omeprazole	EFO_0007056	Neale B	UKBB	European	2017	0.002439	0.0006195	8.24e-05	+	333581	1	risk diff	Neale-B_UKBB_EUR_2017
rs1056441	rs1056441	chr20:62370349	chr20:63738996	C/T	Medication for pain relief, constipation, heartburn: omeprazole	EFO_0007056	Neale B	UKBB	European	2017	0.002439	0.0006195	8.25e-05	+	333581	1	risk diff	Neale-B_UKBB_EUR_2017
rs1056441	rs1056441	chr20:62370349	chr20:63738996	C/T	Number of self-reported non-cancer illnesses	EFO_0009801	Neale B	UKBB	European	2017	0.00836	0.002124	8.27e-05	+	337159	1	-	Neale-B_UKBB_EUR_2017
rs1056441	rs1056441	chr20:62370349	chr20:63738996	C/T	Qualifications: college or university degree	EFO_0004784	Neale B	UKBB	European	2017	-0.004745	0.001205	8.27e-05	-	334070	1	risk diff	Neale-B_UKBB_EUR_2017
rs1056441	rs1056441	chr20:62370349	chr20:63738996	C/T	Medication for pain relief, constipation, heartburn: omeprazole	EFO_0007056	Neale B	UKBB	European	2017	0.002438	0.0006195	8.31e-05	+	333581	1	risk diff	Neale-B_UKBB_EUR_2017
rs1056441	rs1056441	chr20:62370349	chr20:63738996	C/T	Qualifications: college or university degree	EFO_0004784	Neale B	UKBB	European	2017	-0.004742	0.001205	8.34e-05	-	334070	1	risk diff	Neale-B_UKBB_EUR_2017
rs1056441	rs1056441	chr20:62370349	chr20:63738996	C/T	Qualifications: college or university degree	EFO_0004784	Neale B	UKBB	European	2017	-0.004768	0.001213	8.45e-05	-	334070	1	risk diff	Neale-B_UKBB_EUR_2017
rs1056441	rs1056441	chr20:62370349	chr20:63738996	C/T	Qualifications: college or university degree	EFO_0004784	Neale B	UKBB	European	2017	-0.00474	0.001206	8.45e-05	-	334070	1	risk diff	Neale-B_UKBB_EUR_2017
rs1056441	rs1056441	chr20:62370349	chr20:63738996	C/T	Medication for pain relief, constipation, heartburn: omeprazole	EFO_0007056	Neale B	UKBB	European	2017	0.002426	0.0006172	8.5e-05	+	333581	1	risk diff	Neale-B_UKBB_EUR_2017
rs1056441	rs1056441	chr20:62370349	chr20:63738996	C/T	Pediatric Ulcerative Colitis	NCIT_C2952;HP_0100279	Kugathasan S	18758464	European	2008	NA	NA	8.58e-05	NA	5261	-	-	GRASP
rs1056441	rs1056441	chr20:62370349	chr20:63738996	C/T	Qualifications: college or university degree	EFO_0004784	Neale B	UKBB	European	2017	-0.004767	0.001214	8.63e-05	-	334070	1	risk diff	Neale-B_UKBB_EUR_2017
rs1056441	rs1056441	chr20:62370349	chr20:63738996	C/T	Number of self-reported non-cancer illnesses	EFO_0009801	Neale B	UKBB	European	2017	0.008351	0.002127	8.65e-05	+	337159	1	-	Neale-B_UKBB_EUR_2017
rs1056441	rs1056441	chr20:62370349	chr20:63738996	C/T	Number of self-reported non-cancer illnesses	EFO_0009801	Neale B	UKBB	European	2017	0.008336	0.002124	8.67e-05	+	337159	1	-	Neale-B_UKBB_EUR_2017
rs1056441	rs1056441	chr20:62370349	chr20:63738996	C/T	High grade glioma	NCIT_C4822	Wrensch M	19578366	European	2009	NA	NA	8.7e-05	NA	4684	-	-	GRASP
rs1056441	rs1056441	chr20:62370349	chr20:63738996	C/T	Qualifications: college or university degree	EFO_0004784	Neale B	UKBB	European	2017	-0.004756	0.001213	8.77e-05	-	334070	1	risk diff	Neale-B_UKBB_EUR_2017
rs1056441	rs1056441	chr20:62370349	chr20:63738996	C/T	Usual walking pace	EFO_0008002	Neale B	UKBB	European	2017	-0.006196	0.00158	8.83e-05	-	335349	1	-	Neale-B_UKBB_EUR_2017
rs1056441	rs1056441	chr20:62370349	chr20:63738996	C/T	Qualifications: college or university degree	EFO_0004784	Neale B	UKBB	European	2017	-0.004726	0.001206	8.86e-05	-	334070	1	risk diff	Neale-B_UKBB_EUR_2017
rs1056441	rs1056441	chr20:62370349	chr20:63738996	C/T	Qualifications: college or university degree	EFO_0004784	Neale B	UKBB	European	2017	-0.00475	0.001212	8.89e-05	-	334070	1	risk diff	Neale-B_UKBB_EUR_2017
rs1056441	rs1056441	chr20:62370349	chr20:63738996	C/T	Crohns disease	NCIT_C2965	WTCCC	17554300	European	2007	NA	NA	8.92e-05	NA	4806	-	-	GRASP
rs1056441	rs1056441	chr20:62370349	chr20:63738996	C/T	Ulcerative colitis	EFO_0000729	Neale B	UKBB	European	2017	0.0006892	0.000176	8.99e-05	+	337199	1	risk diff	Neale-B_UKBB_EUR_2017
rs1056441	rs1056441	chr20:62370349	chr20:63738996	C/T	Usual walking pace	EFO_0008002	Neale B	UKBB	European	2017	-0.006183	0.001579	9.02e-05	-	335349	1	-	Neale-B_UKBB_EUR_2017
rs1056441	rs1056441	chr20:62370349	chr20:63738996	C/T	Qualifications: college or university degree	EFO_0004784	Neale B	UKBB	European	2017	-0.004743	0.001212	9.09e-05	-	334070	1	risk diff	Neale-B_UKBB_EUR_2017
rs1056441	rs1056441	chr20:62370349	chr20:63738996	C/T	Usual walking pace	EFO_0008002	Neale B	UKBB	European	2017	-0.006181	0.001579	9.09e-05	-	335349	1	-	Neale-B_UKBB_EUR_2017
rs1056441	rs1056441	chr20:62370349	chr20:63738996	C/T	Qualifications: college or university degree	EFO_0004784	Neale B	UKBB	European	2017	-0.00474	0.001212	9.19e-05	-	334070	1	risk diff	Neale-B_UKBB_EUR_2017
rs1056441	rs1056441	chr20:62370349	chr20:63738996	C/T	Qualifications: college or university degree	EFO_0004784	Neale B	UKBB	European	2017	-0.004739	0.001212	9.22e-05	-	334070	1	risk diff	Neale-B_UKBB_EUR_2017
rs1056441	rs1056441	chr20:62370349	chr20:63738996	C/T	Number of self-reported non-cancer illnesses	EFO_0009801	Neale B	UKBB	European	2017	0.008304	0.002124	9.27e-05	+	337159	1	-	Neale-B_UKBB_EUR_2017
rs1056441	rs1056441	chr20:62370349	chr20:63738996	C/T	Usual walking pace	EFO_0008002	Neale B	UKBB	European	2017	-0.006172	0.001579	9.3e-05	-	335349	1	-	Neale-B_UKBB_EUR_2017
rs1056441	rs1056441	chr20:62370349	chr20:63738996	C/T	Qualifications: college or university degree	EFO_0004784	Neale B	UKBB	European	2017	-0.004734	0.001212	9.36e-05	-	334070	1	risk diff	Neale-B_UKBB_EUR_2017
rs1056441	rs1056441	chr20:62370349	chr20:63738996	C/T	Usual walking pace	EFO_0008002	Neale B	UKBB	European	2017	-0.006169	0.001579	9.38e-05	-	335349	1	-	Neale-B_UKBB_EUR_2017
rs1056441	rs1056441	chr20:62370349	chr20:63738996	C/T	Qualifications: college or university degree	EFO_0004784	Neale B	UKBB	European	2017	-0.004729	0.001212	9.53e-05	-	334070	1	risk diff	Neale-B_UKBB_EUR_2017
rs1056441	rs1056441	chr20:62370349	chr20:63738996	C/T	Qualifications: college or university degree	EFO_0004784	Neale B	UKBB	European	2017	-0.004727	0.001212	9.58e-05	-	334070	1	risk diff	Neale-B_UKBB_EUR_2017
rs1056441	rs1056441	chr20:62370349	chr20:63738996	C/T	Pulse rate	EFO_0004326	Neale B	UKBB	European	2017	0.0104	0.002667	9.66e-05	+	317756	1	IVNT	Neale-B_UKBB_EUR_2017
rs1056441	rs1056441	chr20:62370349	chr20:63738996	C/T	Usual walking pace	EFO_0008002	Neale B	UKBB	European	2017	-0.006154	0.00158	9.84e-05	-	335349	1	-	Neale-B_UKBB_EUR_2017
rs1056441	rs1056441	chr20:62370349	chr20:63738996	C/T	Pulse rate	EFO_0004326	Neale B	UKBB	European	2017	0.0104	0.00267	9.85e-05	+	317756	1	IVNT	Neale-B_UKBB_EUR_2017
rs1056441	rs1056441	chr20:62370349	chr20:63738996	C/T	Qualifications: college or university degree	EFO_0004784	Neale B	UKBB	European	2017	-0.004718	0.001212	9.86e-05	-	334070	1	risk diff	Neale-B_UKBB_EUR_2017
rs1056441	rs1056441	chr20:62370349	chr20:63738996	C/T	Self-reported asthma	EFO_0000270	Neale B	UKBB	European	2017	0.003214	0.0008254	9.86e-05	+	337159	1	risk diff	Neale-B_UKBB_EUR_2017
rs1056441	rs1056441	chr20:62370349	chr20:63738996	C/T	Monocyte count	EFO_0004586	Astle W	27863252	European	2016	0.01471	0.00378	9.93e-05	+	173480	2	IVNT	Astle-W_Blood-Cell-Traits_EUR_2016
rs1056441	rs1056441	chr20:62370349	chr20:63738996	C/T	Usual walking pace	EFO_0008002	Neale B	UKBB	European	2017	-0.006141	0.001579	0.0001007	-	335349	1	-	Neale-B_UKBB_EUR_2017
rs1056441	rs1056441	chr20:62370349	chr20:63738996	C/T	Ulcerative colitis	EFO_0000729	Neale B	UKBB	European	2017	0.000684	0.000176	0.0001015	+	337199	1	risk diff	Neale-B_UKBB_EUR_2017
rs1056441	rs1056441	chr20:62370349	chr20:63738996	C/T	Usual walking pace	EFO_0008002	Neale B	UKBB	European	2017	-0.006137	0.001579	0.0001018	-	335349	1	-	Neale-B_UKBB_EUR_2017
rs1056441	rs1056441	chr20:62370349	chr20:63738996	C/T	Self-reported asthma	EFO_0000270	Neale B	UKBB	European	2017	0.003212	0.0008266	0.0001018	+	337159	1	risk diff	Neale-B_UKBB_EUR_2017
rs1056441	rs1056441	chr20:62370349	chr20:63738996	C/T	Usual walking pace	EFO_0008002	Neale B	UKBB	European	2017	-0.006132	0.001579	0.0001033	-	335349	1	-	Neale-B_UKBB_EUR_2017
rs1056441	rs1056441	chr20:62370349	chr20:63738996	C/T	Qualifications: college or university degree	EFO_0004784	Neale B	UKBB	European	2017	-0.004673	0.001206	0.0001061	-	334070	1	risk diff	Neale-B_UKBB_EUR_2017
rs1056441	rs1056441	chr20:62370349	chr20:63738996	C/T	Medication for pain relief, constipation, heartburn: omeprazole	EFO_0007056	Neale B	UKBB	European	2017	0.002388	0.0006163	0.0001071	+	333581	1	risk diff	Neale-B_UKBB_EUR_2017
rs1056441	rs1056441	chr20:62370349	chr20:63738996	C/T	Usual walking pace	EFO_0008002	Neale B	UKBB	European	2017	-0.006115	0.001579	0.0001083	-	335349	1	-	Neale-B_UKBB_EUR_2017
rs1056441	rs1056441	chr20:62370349	chr20:63738996	C/T	Arm fat-free mass left	-	Neale B	UKBB	European	2017	0.006366	0.001645	0.0001086	+	331159	1	IVNT	Neale-B_UKBB_EUR_2017
rs1056441	rs1056441	chr20:62370349	chr20:63738996	C/T	Pulse rate	EFO_0004326	Neale B	UKBB	European	2017	0.01032	0.002667	0.0001088	+	317756	1	IVNT	Neale-B_UKBB_EUR_2017
rs1056441	rs1056441	chr20:62370349	chr20:63738996	C/T	Pulse rate	EFO_0004326	Neale B	UKBB	European	2017	0.01031	0.002665	0.0001103	+	317756	1	IVNT	Neale-B_UKBB_EUR_2017
rs1056441	rs1056441	chr20:62370349	chr20:63738996	C/T	Pain type experienced in last month: pain all over the body	EFO_0003843	Neale B	UKBB	European	2017	0.001225	0.000317	0.0001111	+	336650	1	risk diff	Neale-B_UKBB_EUR_2017
rs1056441	rs1056441	chr20:62370349	chr20:63738996	C/T	Diverticular disease of intestine	EFO_1001460	Neale B	UKBB	European	2017	-0.001464	0.0003794	0.0001145	-	337199	1	risk diff	Neale-B_UKBB_EUR_2017
rs1056441	rs1056441	chr20:62370349	chr20:63738996	C/T	Waist circumference	EFO_0004342	Neale B	UKBB	European	2017	0.009136	0.002372	0.0001175	+	336639	1	IVNT	Neale-B_UKBB_EUR_2017
rs1056441	rs1056441	chr20:62370349	chr20:63738996	C/T	Pain type experienced in last month: pain all over the body	EFO_0003843	Neale B	UKBB	European	2017	0.001213	0.0003151	0.0001179	+	336650	1	risk diff	Neale-B_UKBB_EUR_2017
rs1056441	rs1056441	chr20:62370349	chr20:63738996	C/T	Self-reported asthma	EFO_0000270	Neale B	UKBB	European	2017	0.003176	0.0008254	0.0001189	+	337159	1	risk diff	Neale-B_UKBB_EUR_2017
rs1056441	rs1056441	chr20:62370349	chr20:63738996	C/T	Arm fat-free mass left	-	Neale B	UKBB	European	2017	0.006322	0.001644	0.0001209	+	331159	1	IVNT	Neale-B_UKBB_EUR_2017
rs1056441	rs1056441	chr20:62370349	chr20:63738996	C/T	Pain type experienced in last month: pain all over the body	EFO_0003843	Neale B	UKBB	European	2017	0.001218	0.000317	0.0001212	+	336650	1	risk diff	Neale-B_UKBB_EUR_2017
rs1056441	rs1056441	chr20:62370349	chr20:63738996	C/T	Pain type experienced in last month: pain all over the body	EFO_0003843	Neale B	UKBB	European	2017	0.001218	0.000317	0.0001215	+	336650	1	risk diff	Neale-B_UKBB_EUR_2017
rs1056441	rs1056441	chr20:62370349	chr20:63738996	C/T	Arm predicted mass left	-	Neale B	UKBB	European	2017	0.006296	0.001639	0.0001219	+	331146	1	IVNT	Neale-B_UKBB_EUR_2017
rs1056441	rs1056441	chr20:62370349	chr20:63738996	C/T	Pain type experienced in last month: pain all over the body	EFO_0003843	Neale B	UKBB	European	2017	0.001217	0.000317	0.0001227	+	336650	1	risk diff	Neale-B_UKBB_EUR_2017
rs1056441	rs1056441	chr20:62370349	chr20:63738996	C/T	Pain type experienced in last month: pain all over the body	EFO_0003843	Neale B	UKBB	European	2017	0.001217	0.000317	0.0001233	+	336650	1	risk diff	Neale-B_UKBB_EUR_2017
rs1056441	rs1056441	chr20:62370349	chr20:63738996	C/T	Self-reported asthma	EFO_0000270	Neale B	UKBB	European	2017	0.003168	0.0008252	0.0001237	+	337159	1	risk diff	Neale-B_UKBB_EUR_2017
rs1056441	rs1056441	chr20:62370349	chr20:63738996	C/T	Arm fat percentage right	-	Neale B	UKBB	European	2017	0.007815	0.002037	0.0001247	+	331249	1	IVNT	Neale-B_UKBB_EUR_2017
rs1056441	rs1056441	chr20:62370349	chr20:63738996	C/T	Self-reported asthma	EFO_0000270	Neale B	UKBB	European	2017	0.003166	0.0008252	0.0001252	+	337159	1	risk diff	Neale-B_UKBB_EUR_2017
rs1056441	rs1056441	chr20:62370349	chr20:63738996	C/T	Pain type experienced in last month: pain all over the body	EFO_0003843	Neale B	UKBB	European	2017	0.001215	0.0003169	0.0001256	+	336650	1	risk diff	Neale-B_UKBB_EUR_2017
rs1056441	rs1056441	chr20:62370349	chr20:63738996	C/T	Pain type experienced in last month: pain all over the body	EFO_0003843	Neale B	UKBB	European	2017	0.001215	0.0003169	0.0001262	+	336650	1	risk diff	Neale-B_UKBB_EUR_2017
rs1056441	rs1056441	chr20:62370349	chr20:63738996	C/T	Self-reported asthma	EFO_0000270	Neale B	UKBB	European	2017	0.003164	0.0008252	0.0001262	+	337159	1	risk diff	Neale-B_UKBB_EUR_2017
rs1056441	rs1056441	chr20:62370349	chr20:63738996	C/T	Pain type experienced in last month: pain all over the body	EFO_0003843	Neale B	UKBB	European	2017	0.001214	0.0003169	0.0001279	+	336650	1	risk diff	Neale-B_UKBB_EUR_2017
rs1056441	rs1056441	chr20:62370349	chr20:63738996	C/T	Pediatric Ulcerative Colitis	NCIT_C2952;HP_0100279	Kugathasan S	18758464	European	2008	NA	NA	0.00013	NA	5261	-	-	GRASP
rs1056441	rs1056441	chr20:62370349	chr20:63738996	C/T	Pain type experienced in last month: pain all over the body	EFO_0003843	Neale B	UKBB	European	2017	0.001206	0.0003151	0.00013	+	336650	1	risk diff	Neale-B_UKBB_EUR_2017
rs1056441	rs1056441	chr20:62370349	chr20:63738996	C/T	Pulse rate	EFO_0004326	Neale B	UKBB	European	2017	0.0102	0.002666	0.0001305	+	317756	1	IVNT	Neale-B_UKBB_EUR_2017
rs1056441	rs1056441	chr20:62370349	chr20:63738996	C/T	Qualifications: college or university degree	EFO_0004784	Neale B	UKBB	European	2017	-0.004619	0.001207	0.0001306	-	334070	1	risk diff	Neale-B_UKBB_EUR_2017
rs1056441	rs1056441	chr20:62370349	chr20:63738996	C/T	Pulse rate	EFO_0004326	Neale B	UKBB	European	2017	0.01019	0.002665	0.000131	+	317756	1	IVNT	Neale-B_UKBB_EUR_2017
rs1056441	rs1056441	chr20:62370349	chr20:63738996	C/T	Arm predicted mass left	-	Neale B	UKBB	European	2017	0.006264	0.001638	0.0001316	+	331146	1	IVNT	Neale-B_UKBB_EUR_2017
rs1056441	rs1056441	chr20:62370349	chr20:63738996	C/T	Pulse rate	EFO_0004326	Neale B	UKBB	European	2017	0.01018	0.002665	0.000134	+	317756	1	IVNT	Neale-B_UKBB_EUR_2017
rs1056441	rs1056441	chr20:62370349	chr20:63738996	C/T	Pain type experienced in last month: pain all over the body	EFO_0003843	Neale B	UKBB	European	2017	0.001211	0.0003171	0.000134	+	336650	1	risk diff	Neale-B_UKBB_EUR_2017
rs1056441	rs1056441	chr20:62370349	chr20:63738996	C/T	Arm fat-free mass left	-	Neale B	UKBB	European	2017	0.006278	0.001644	0.0001345	+	331159	1	IVNT	Neale-B_UKBB_EUR_2017
rs1056441	rs1056441	chr20:62370349	chr20:63738996	C/T	Pulse rate	EFO_0004326	Neale B	UKBB	European	2017	0.01017	0.002665	0.0001347	+	317756	1	IVNT	Neale-B_UKBB_EUR_2017
rs1056441	rs1056441	chr20:62370349	chr20:63738996	C/T	Pulse rate	EFO_0004326	Neale B	UKBB	European	2017	0.01017	0.002665	0.000135	+	317756	1	IVNT	Neale-B_UKBB_EUR_2017
rs1056441	rs1056441	chr20:62370349	chr20:63738996	C/T	Self-reported asthma	EFO_0000270	Neale B	UKBB	European	2017	0.00315	0.0008254	0.0001353	+	337159	1	risk diff	Neale-B_UKBB_EUR_2017
rs1056441	rs1056441	chr20:62370349	chr20:63738996	C/T	Arm fat-free mass left	-	Neale B	UKBB	European	2017	0.006269	0.001643	0.0001361	+	331159	1	IVNT	Neale-B_UKBB_EUR_2017
rs1056441	rs1056441	chr20:62370349	chr20:63738996	C/T	Pulse rate	EFO_0004326	Neale B	UKBB	European	2017	0.01016	0.002665	0.0001366	+	317756	1	IVNT	Neale-B_UKBB_EUR_2017
rs1056441	rs1056441	chr20:62370349	chr20:63738996	C/T	Pulse rate	EFO_0004326	Neale B	UKBB	European	2017	0.01011	0.002651	0.0001369	+	317756	1	IVNT	Neale-B_UKBB_EUR_2017
rs1056441	rs1056441	chr20:62370349	chr20:63738996	C/T	Usual walking pace	EFO_0008002	Neale B	UKBB	European	2017	-0.005988	0.001571	0.0001377	-	335349	1	-	Neale-B_UKBB_EUR_2017
rs1056441	rs1056441	chr20:62370349	chr20:63738996	C/T	Pulse rate	EFO_0004326	Neale B	UKBB	European	2017	0.01011	0.002651	0.0001379	+	317756	1	IVNT	Neale-B_UKBB_EUR_2017
rs1056441	rs1056441	chr20:62370349	chr20:63738996	C/T	Pulse rate	EFO_0004326	Neale B	UKBB	European	2017	0.01015	0.002665	0.0001391	+	317756	1	IVNT	Neale-B_UKBB_EUR_2017
rs1056441	rs1056441	chr20:62370349	chr20:63738996	C/T	Usual walking pace	EFO_0008002	Neale B	UKBB	European	2017	-0.005982	0.001571	0.0001399	-	335349	1	-	Neale-B_UKBB_EUR_2017
rs1056441	rs1056441	chr20:62370349	chr20:63738996	C/T	Arm fat-free mass left	-	Neale B	UKBB	European	2017	0.006267	0.001646	0.0001408	+	331159	1	IVNT	Neale-B_UKBB_EUR_2017
rs1056441	rs1056441	chr20:62370349	chr20:63738996	C/T	Pulse rate	EFO_0004326	Neale B	UKBB	European	2017	0.01014	0.002665	0.0001421	+	317756	1	IVNT	Neale-B_UKBB_EUR_2017
rs1056441	rs1056441	chr20:62370349	chr20:63738996	C/T	Arm fat-free mass left	-	Neale B	UKBB	European	2017	0.006251	0.001643	0.0001423	+	331159	1	IVNT	Neale-B_UKBB_EUR_2017
rs1056441	rs1056441	chr20:62370349	chr20:63738996	C/T	Time spent watching television	-	Neale B	UKBB	European	2017	0.007839	0.002061	0.0001428	+	319740	1	-	Neale-B_UKBB_EUR_2017
rs1056441	rs1056441	chr20:62370349	chr20:63738996	C/T	Arm fat-free mass left	-	Neale B	UKBB	European	2017	0.006249	0.001643	0.000143	+	331159	1	IVNT	Neale-B_UKBB_EUR_2017
rs1056441	rs1056441	chr20:62370349	chr20:63738996	C/T	Arm predicted mass left	-	Neale B	UKBB	European	2017	0.006225	0.001637	0.0001432	+	331146	1	IVNT	Neale-B_UKBB_EUR_2017
rs1056441	rs1056441	chr20:62370349	chr20:63738996	C/T	Pain type experienced in last month: pain all over the body	EFO_0003843	Neale B	UKBB	European	2017	0.001206	0.0003173	0.000144	+	336650	1	risk diff	Neale-B_UKBB_EUR_2017
rs1056441	rs1056441	chr20:62370349	chr20:63738996	C/T	Arm fat-free mass left	-	Neale B	UKBB	European	2017	0.006245	0.001643	0.0001445	+	331159	1	IVNT	Neale-B_UKBB_EUR_2017
rs1056441	rs1056441	chr20:62370349	chr20:63738996	C/T	Pain type experienced in last month: pain all over the body	EFO_0003843	Neale B	UKBB	European	2017	0.001205	0.0003172	0.0001457	+	336650	1	risk diff	Neale-B_UKBB_EUR_2017
rs1056441	rs1056441	chr20:62370349	chr20:63738996	C/T	Arm predicted mass left	-	Neale B	UKBB	European	2017	0.006215	0.001637	0.0001467	+	331146	1	IVNT	Neale-B_UKBB_EUR_2017
rs1056441	rs1056441	chr20:62370349	chr20:63738996	C/T	Total cholesterol	EFO_0004574	GLGC	24097068	European	2013	-0.0166	0.0039	0.0001469	-	187365	60	IVNT	GLGC_TC_EUR_2013
rs1056441	rs1056441	chr20:62370349	chr20:63738996	C/T	Medication for pain relief, constipation, heartburn: omeprazole	EFO_0007056	Neale B	UKBB	European	2017	0.002338	0.0006158	0.0001469	+	333581	1	risk diff	Neale-B_UKBB_EUR_2017
rs1056441	rs1056441	chr20:62370349	chr20:63738996	C/T	Arm predicted mass left	-	Neale B	UKBB	European	2017	0.006213	0.001637	0.0001474	+	331146	1	IVNT	Neale-B_UKBB_EUR_2017
rs1056441	rs1056441	chr20:62370349	chr20:63738996	C/T	White blood cell count	EFO_0004586	Astle W	27863252	European	2016	0.0144	0.003795	0.0001485	+	173480	2	IVNT	Astle-W_Blood-Cell-Traits_EUR_2016
rs1056441	rs1056441	chr20:62370349	chr20:63738996	C/T	Arm fat-free mass left	-	Neale B	UKBB	European	2017	0.00623	0.001643	0.0001497	+	331159	1	IVNT	Neale-B_UKBB_EUR_2017
rs1056441	rs1056441	chr20:62370349	chr20:63738996	C/T	Arm predicted mass left	-	Neale B	UKBB	European	2017	0.006204	0.001637	0.0001507	+	331146	1	IVNT	Neale-B_UKBB_EUR_2017
rs1056441	rs1056441	chr20:62370349	chr20:63738996	C/T	Arm predicted mass left	-	Neale B	UKBB	European	2017	0.006206	0.001638	0.0001513	+	331146	1	IVNT	Neale-B_UKBB_EUR_2017
rs1056441	rs1056441	chr20:62370349	chr20:63738996	C/T	Usual walking pace	EFO_0008002	Neale B	UKBB	European	2017	-0.00595	0.001571	0.0001517	-	335349	1	-	Neale-B_UKBB_EUR_2017
rs1056441	rs1056441	chr20:62370349	chr20:63738996	C/T	Neutrophil percentage of white cells	EFO_0004586	Astle W	27863252	European	2016	0.0149	0.003934	0.0001522	+	173480	2	IVNT	Astle-W_Blood-Cell-Traits_EUR_2016
rs1056441	rs1056441	chr20:62370349	chr20:63738996	C/T	White blood cell count	EFO_0004586	Astle W	27863252	European	2016	0.01436	0.003791	0.0001525	+	173480	2	IVNT	Astle-W_Blood-Cell-Traits_EUR_2016
rs1056441	rs1056441	chr20:62370349	chr20:63738996	C/T	Treatment with domperidone	EFO_0007056	Neale B	UKBB	European	2017	0.0004397	0.0001161	0.0001526	+	337159	1	risk diff	Neale-B_UKBB_EUR_2017
rs1056441	rs1056441	chr20:62370349	chr20:63738996	C/T	Arm fat-free mass left	-	Neale B	UKBB	European	2017	0.00622	0.001643	0.000154	+	331159	1	IVNT	Neale-B_UKBB_EUR_2017
rs1056441	rs1056441	chr20:62370349	chr20:63738996	C/T	Usual walking pace	EFO_0008002	Neale B	UKBB	European	2017	-0.005946	0.001571	0.000154	-	335349	1	-	Neale-B_UKBB_EUR_2017
rs1056441	rs1056441	chr20:62370349	chr20:63738996	C/T	Arm predicted mass left	-	Neale B	UKBB	European	2017	0.006205	0.00164	0.0001547	+	331146	1	IVNT	Neale-B_UKBB_EUR_2017
rs1056441	rs1056441	chr20:62370349	chr20:63738996	C/T	Arm fat-free mass left	-	Neale B	UKBB	European	2017	0.006208	0.001643	0.0001579	+	331159	1	IVNT	Neale-B_UKBB_EUR_2017
rs1056441	rs1056441	chr20:62370349	chr20:63738996	C/T	Pulse rate	EFO_0004326	Neale B	UKBB	European	2017	0.01	0.00265	0.0001615	+	317756	1	IVNT	Neale-B_UKBB_EUR_2017
rs1056441	rs1056441	chr20:62370349	chr20:63738996	C/T	Arm predicted mass left	-	Neale B	UKBB	European	2017	0.006174	0.001637	0.0001621	+	331146	1	IVNT	Neale-B_UKBB_EUR_2017
rs1056441	rs1056441	chr20:62370349	chr20:63738996	C/T	Pulse rate	EFO_0004326	Neale B	UKBB	European	2017	0.009994	0.002651	0.0001629	+	317756	1	IVNT	Neale-B_UKBB_EUR_2017
rs1056441	rs1056441	chr20:62370349	chr20:63738996	C/T	Asthma	EFO_0000270	Neale B	UKBB	European	2017	0.003119	0.0008282	0.0001661	+	336782	1	risk diff	Neale-B_UKBB_EUR_2017
rs1056441	rs1056441	chr20:62370349	chr20:63738996	C/T	Arm predicted mass left	-	Neale B	UKBB	European	2017	0.006161	0.001637	0.0001674	+	331146	1	IVNT	Neale-B_UKBB_EUR_2017
rs1056441	rs1056441	chr20:62370349	chr20:63738996	C/T	Arm predicted mass left	-	Neale B	UKBB	European	2017	0.006161	0.001637	0.000168	+	331146	1	IVNT	Neale-B_UKBB_EUR_2017
rs1056441	rs1056441	chr20:62370349	chr20:63738996	C/T	Pulse rate	EFO_0004326	Neale B	UKBB	European	2017	0.00997	0.00265	0.0001687	+	317756	1	IVNT	Neale-B_UKBB_EUR_2017
rs1056441	rs1056441	chr20:62370349	chr20:63738996	C/T	Treatment with domperidone	EFO_0007056	Neale B	UKBB	European	2017	0.0004368	0.0001162	0.0001711	+	337159	1	risk diff	Neale-B_UKBB_EUR_2017
rs1056441	rs1056441	chr20:62370349	chr20:63738996	C/T	Total cholesterol	EFO_0004574	GLGC	24097068	European	2013	-0.0166	0.004	0.0001738	-	187365	60	IVNT	GLGC_TC_EUR_2013
rs1056441	rs1056441	chr20:62370349	chr20:63738996	C/T	Treatment with domperidone	EFO_0007056	Neale B	UKBB	European	2017	0.0004358	0.0001161	0.000174	+	337159	1	risk diff	Neale-B_UKBB_EUR_2017
rs1056441	rs1056441	chr20:62370349	chr20:63738996	C/T	Pulse rate	EFO_0004326	Neale B	UKBB	European	2017	0.009961	0.002655	0.0001754	+	317756	1	IVNT	Neale-B_UKBB_EUR_2017
rs1056441	rs1056441	chr20:62370349	chr20:63738996	C/T	Pain type experienced in last month: pain all over the body	EFO_0003843	Neale B	UKBB	European	2017	0.001191	0.0003175	0.0001758	+	336650	1	risk diff	Neale-B_UKBB_EUR_2017
rs1056441	rs1056441	chr20:62370349	chr20:63738996	C/T	Usual walking pace	EFO_0008002	Neale B	UKBB	European	2017	-0.005894	0.001571	0.000176	-	335349	1	-	Neale-B_UKBB_EUR_2017
rs1056441	rs1056441	chr20:62370349	chr20:63738996	C/T	Allergic disease	EFO_0003785	Ferreira M	29083406	European	2017	0.0237	0.0063	0.0001796	+	360838	13	log OR	Ferreira-M_Allergic-Disease_EUR_2017
rs1056441	rs1056441	chr20:62370349	chr20:63738996	C/T	Usual walking pace	EFO_0008002	Neale B	UKBB	European	2017	-0.005876	0.00157	0.0001819	-	335349	1	-	Neale-B_UKBB_EUR_2017
rs1056441	rs1056441	chr20:62370349	chr20:63738996	C/T	Asthma	EFO_0000270	Neale B	UKBB	European	2017	0.0031	0.0008286	0.000183	+	336782	1	risk diff	Neale-B_UKBB_EUR_2017
rs1056441	rs1056441	chr20:62370349	chr20:63738996	C/T	Long-standing illness, disability or infirmity	-	Neale B	UKBB	European	2017	0.004595	0.001229	0.0001839	+	329663	1	risk diff	Neale-B_UKBB_EUR_2017
rs1056441	rs1056441	chr20:62370349	chr20:63738996	C/T	Asthma	EFO_0000270	Neale B	UKBB	European	2017	0.003097	0.000828	0.0001839	+	336782	1	risk diff	Neale-B_UKBB_EUR_2017
rs1056441	rs1056441	chr20:62370349	chr20:63738996	C/T	Arm fat-free mass left	-	Neale B	UKBB	European	2017	0.006139	0.001643	0.0001873	+	331159	1	IVNT	Neale-B_UKBB_EUR_2017
rs1056441	rs1056441	chr20:62370349	chr20:63738996	C/T	Medication for pain relief, constipation, heartburn: omeprazole	EFO_0007056	Neale B	UKBB	European	2017	0.002298	0.0006158	0.00019	+	333581	1	risk diff	Neale-B_UKBB_EUR_2017
rs1056441	rs1056441	chr20:62370349	chr20:63738996	C/T	Asthma	EFO_0000270	Neale B	UKBB	European	2017	0.003089	0.000828	0.0001908	+	336782	1	risk diff	Neale-B_UKBB_EUR_2017
rs1056441	rs1056441	chr20:62370349	chr20:63738996	C/T	Arm fat percentage left	-	Neale B	UKBB	European	2017	0.007562	0.002027	0.0001917	+	331198	1	IVNT	Neale-B_UKBB_EUR_2017
rs1056441	rs1056441	chr20:62370349	chr20:63738996	C/T	Asthma	EFO_0000270	Neale B	UKBB	European	2017	0.003088	0.0008281	0.0001928	+	336782	1	risk diff	Neale-B_UKBB_EUR_2017
rs1056441	rs1056441	chr20:62370349	chr20:63738996	C/T	Asthma	EFO_0000270	Neale B	UKBB	European	2017	0.003083	0.0008281	0.0001969	+	336782	1	risk diff	Neale-B_UKBB_EUR_2017
rs1056441	rs1056441	chr20:62370349	chr20:63738996	C/T	Asthma	EFO_0000270	Neale B	UKBB	European	2017	0.003079	0.000828	0.0002007	+	336782	1	risk diff	Neale-B_UKBB_EUR_2017
rs1056441	rs1056441	chr20:62370349	chr20:63738996	C/T	Platelet count	EFO_0004586	Astle W	27863252	European	2016	0.01494	0.00402	0.0002012	+	173480	2	IVNT	Astle-W_Blood-Cell-Traits_EUR_2016
rs1056441	rs1056441	chr20:62370349	chr20:63738996	C/T	Arm predicted mass left	-	Neale B	UKBB	European	2017	0.006085	0.001637	0.0002021	+	331146	1	IVNT	Neale-B_UKBB_EUR_2017
rs1056441	rs1056441	chr20:62370349	chr20:63738996	C/T	Asthma	EFO_0000270	Neale B	UKBB	European	2017	0.003076	0.0008281	0.0002038	+	336782	1	risk diff	Neale-B_UKBB_EUR_2017
rs1056441	rs1056441	chr20:62370349	chr20:63738996	C/T	Number of self-reported non-cancer illnesses	EFO_0009801	Neale B	UKBB	European	2017	0.007945	0.002139	0.000204	+	337159	1	-	Neale-B_UKBB_EUR_2017
rs1056441	rs1056441	chr20:62370349	chr20:63738996	C/T	Diastolic blood pressure	EFO_0006336	Neale B	UKBB	European	2017	0.01008	0.002715	0.0002045	+	317756	1	IVNT	Neale-B_UKBB_EUR_2017
rs1056441	rs1056441	chr20:62370349	chr20:63738996	C/T	Asthma	EFO_0000270	Neale B	UKBB	European	2017	0.003074	0.0008281	0.0002056	+	336782	1	risk diff	Neale-B_UKBB_EUR_2017
rs1056441	rs1056441	chr20:62370349	chr20:63738996	C/T	Body mass index	EFO_0004340	Neale B	UKBB	European	2017	0.009442	0.002544	0.0002061	+	336107	1	IVNT	Neale-B_UKBB_EUR_2017
rs1056441	rs1056441	chr20:62370349	chr20:63738996	C/T	Number of self-reported non-cancer illnesses	EFO_0009801	Neale B	UKBB	European	2017	0.007926	0.002137	0.0002086	+	337159	1	-	Neale-B_UKBB_EUR_2017
rs1056441	rs1056441	chr20:62370349	chr20:63738996	C/T	Red blood cell count	EFO_0004586	Astle W	27863252	European	2016	0.01396	0.003766	0.0002097	+	173480	2	IVNT	Astle-W_Blood-Cell-Traits_EUR_2016
rs1056441	rs1056441	chr20:62370349	chr20:63738996	C/T	White blood cell count	EFO_0004586	Astle W	27863252	European	2016	0.01405	0.003793	0.0002107	+	173480	2	IVNT	Astle-W_Blood-Cell-Traits_EUR_2016
rs1056441	rs1056441	chr20:62370349	chr20:63738996	C/T	Usual walking pace	EFO_0008002	Neale B	UKBB	European	2017	-0.005829	0.001573	0.0002116	-	335349	1	-	Neale-B_UKBB_EUR_2017
rs1056441	rs1056441	chr20:62370349	chr20:63738996	C/T	Asthma	EFO_0000270	Neale B	UKBB	European	2017	0.003072	0.0008296	0.0002134	+	336782	1	risk diff	Neale-B_UKBB_EUR_2017
rs1056441	rs1056441	chr20:62370349	chr20:63738996	C/T	Other general symptoms and signs	EFO_0003765	Neale B	UKBB	European	2017	-0.0001451	3.92e-05	0.000214	-	337199	1	risk diff	Neale-B_UKBB_EUR_2017
rs1056441	rs1056441	chr20:62370349	chr20:63738996	C/T	Body mass index	EFO_0004340	Neale B	UKBB	European	2017	0.00941	0.002544	0.0002166	+	336107	1	IVNT	Neale-B_UKBB_EUR_2017
rs1056441	rs1056441	chr20:62370349	chr20:63738996	C/T	Number of self-reported non-cancer illnesses	EFO_0009801	Neale B	UKBB	European	2017	0.007904	0.002137	0.0002167	+	337159	1	-	Neale-B_UKBB_EUR_2017
rs1056441	rs1056441	chr20:62370349	chr20:63738996	C/T	Number of self-reported non-cancer illnesses	EFO_0009801	Neale B	UKBB	European	2017	0.007896	0.002135	0.0002175	+	337159	1	-	Neale-B_UKBB_EUR_2017
rs1056441	rs1056441	chr20:62370349	chr20:63738996	C/T	Body mass index	EFO_0004340	Neale B	UKBB	European	2017	0.0094	0.002543	0.0002193	+	336107	1	IVNT	Neale-B_UKBB_EUR_2017
rs1056441	rs1056441	chr20:62370349	chr20:63738996	C/T	Body mass index	EFO_0004340	Neale B	UKBB	European	2017	0.0094	0.002543	0.0002193	+	336107	1	IVNT	Neale-B_UKBB_EUR_2017
rs1056441	rs1056441	chr20:62370349	chr20:63738996	C/T	Other general symptoms and signs	EFO_0003765	Neale B	UKBB	European	2017	-0.0001447	3.92e-05	0.0002229	-	337199	1	risk diff	Neale-B_UKBB_EUR_2017
rs1056441	rs1056441	chr20:62370349	chr20:63738996	C/T	Number of self-reported non-cancer illnesses	EFO_0009801	Neale B	UKBB	European	2017	0.00788	0.002136	0.0002242	+	337159	1	-	Neale-B_UKBB_EUR_2017
rs1056441	rs1056441	chr20:62370349	chr20:63738996	C/T	Pulse rate	EFO_0004326	Neale B	UKBB	European	2017	0.009773	0.002651	0.0002274	+	317756	1	IVNT	Neale-B_UKBB_EUR_2017
rs1056441	rs1056441	chr20:62370349	chr20:63738996	C/T	Usual walking pace	EFO_0008002	Neale B	UKBB	European	2017	-0.005787	0.00157	0.0002274	-	335349	1	-	Neale-B_UKBB_EUR_2017
rs1056441	rs1056441	chr20:62370349	chr20:63738996	C/T	Asthma	EFO_0000270	Neale B	UKBB	European	2017	0.003055	0.0008289	0.0002282	+	336782	1	risk diff	Neale-B_UKBB_EUR_2017
rs1056441	rs1056441	chr20:62370349	chr20:63738996	C/T	Asthma	EFO_0000270	Neale B	UKBB	European	2017	0.003053	0.0008287	0.0002299	+	336782	1	risk diff	Neale-B_UKBB_EUR_2017
rs1056441	rs1056441	chr20:62370349	chr20:63738996	C/T	Treatment with domperidone	EFO_0007056	Neale B	UKBB	European	2017	0.0004273	0.000116	0.0002303	+	337159	1	risk diff	Neale-B_UKBB_EUR_2017
rs1056441	rs1056441	chr20:62370349	chr20:63738996	C/T	Arm fat mass left	-	Neale B	UKBB	European	2017	0.009666	0.002625	0.0002313	+	331164	1	IVNT	Neale-B_UKBB_EUR_2017
rs1056441	rs1056441	chr20:62370349	chr20:63738996	C/T	Other general symptoms and signs	EFO_0003765	Neale B	UKBB	European	2017	-0.0001442	3.92e-05	0.0002378	-	337199	1	risk diff	Neale-B_UKBB_EUR_2017
rs1056441	rs1056441	chr20:62370349	chr20:63738996	C/T	Body mass index	EFO_0004340	Neale B	UKBB	European	2017	0.009358	0.002548	0.0002396	+	336107	1	IVNT	Neale-B_UKBB_EUR_2017
rs1056441	rs1056441	chr20:62370349	chr20:63738996	C/T	Treatment with domperidone	EFO_0007056	Neale B	UKBB	European	2017	0.000426	0.000116	0.0002404	+	337159	1	risk diff	Neale-B_UKBB_EUR_2017
rs1056441	rs1056441	chr20:62370349	chr20:63738996	C/T	Monocyte count	EFO_0004586	Astle W	27863252	European	2016	0.0139	0.003787	0.0002413	+	173480	2	IVNT	Astle-W_Blood-Cell-Traits_EUR_2016
rs1056441	rs1056441	chr20:62370349	chr20:63738996	C/T	Treatment with domperidone	EFO_0007056	Neale B	UKBB	European	2017	0.0004257	0.000116	0.0002429	+	337159	1	risk diff	Neale-B_UKBB_EUR_2017
rs1056441	rs1056441	chr20:62370349	chr20:63738996	C/T	Treatment with domperidone	EFO_0007056	Neale B	UKBB	European	2017	0.0004254	0.000116	0.0002451	+	337159	1	risk diff	Neale-B_UKBB_EUR_2017
rs1056441	rs1056441	chr20:62370349	chr20:63738996	C/T	Pulse rate	EFO_0004326	Neale B	UKBB	European	2017	0.009713	0.002649	0.0002455	+	317756	1	IVNT	Neale-B_UKBB_EUR_2017
rs1056441	rs1056441	chr20:62370349	chr20:63738996	C/T	Treatment with domperidone	EFO_0007056	Neale B	UKBB	European	2017	0.0004253	0.000116	0.0002464	+	337159	1	risk diff	Neale-B_UKBB_EUR_2017
rs1056441	rs1056441	chr20:62370349	chr20:63738996	C/T	Treatment with domperidone	EFO_0007056	Neale B	UKBB	European	2017	0.0004253	0.000116	0.0002465	+	337159	1	risk diff	Neale-B_UKBB_EUR_2017
rs1056441	rs1056441	chr20:62370349	chr20:63738996	C/T	Ulcerative colitis	EFO_0000729	Neale B	UKBB	European	2017	0.0006457	0.0001761	0.0002466	+	337199	1	risk diff	Neale-B_UKBB_EUR_2017
rs1056441	rs1056441	chr20:62370349	chr20:63738996	C/T	Treatment with domperidone	EFO_0007056	Neale B	UKBB	European	2017	0.0004252	0.000116	0.0002471	+	337159	1	risk diff	Neale-B_UKBB_EUR_2017
rs1056441	rs1056441	chr20:62370349	chr20:63738996	C/T	Number of self-reported non-cancer illnesses	EFO_0009801	Neale B	UKBB	European	2017	0.007822	0.002135	0.0002485	+	337159	1	-	Neale-B_UKBB_EUR_2017
rs1056441	rs1056441	chr20:62370349	chr20:63738996	C/T	Number of self-reported non-cancer illnesses	EFO_0009801	Neale B	UKBB	European	2017	0.007819	0.002135	0.0002504	+	337159	1	-	Neale-B_UKBB_EUR_2017
rs1056441	rs1056441	chr20:62370349	chr20:63738996	C/T	Pain type experienced in last month: pain all over the body	EFO_0003843	Neale B	UKBB	European	2017	0.001155	0.0003153	0.0002508	+	336650	1	risk diff	Neale-B_UKBB_EUR_2017
rs1056441	rs1056441	chr20:62370349	chr20:63738996	C/T	Treatment with domperidone	EFO_0007056	Neale B	UKBB	European	2017	0.0004249	0.0001161	0.0002517	+	337159	1	risk diff	Neale-B_UKBB_EUR_2017
rs1056441	rs1056441	chr20:62370349	chr20:63738996	C/T	Treatment with domperidone	EFO_0007056	Neale B	UKBB	European	2017	0.0004247	0.000116	0.000252	+	337159	1	risk diff	Neale-B_UKBB_EUR_2017
rs1056441	rs1056441	chr20:62370349	chr20:63738996	C/T	Body mass index	EFO_0004340	Neale B	UKBB	European	2017	0.00929	0.002543	0.0002592	+	336107	1	IVNT	Neale-B_UKBB_EUR_2017
rs1056441	rs1056441	chr20:62370349	chr20:63738996	C/T	Ulcerative colitis	EFO_0000729	Neale B	UKBB	European	2017	0.000643	0.0001761	0.0002616	+	337199	1	risk diff	Neale-B_UKBB_EUR_2017
rs1056441	rs1056441	chr20:62370349	chr20:63738996	C/T	Number of self-reported non-cancer illnesses	EFO_0009801	Neale B	UKBB	European	2017	0.007781	0.002136	0.0002702	+	337159	1	-	Neale-B_UKBB_EUR_2017
rs1056441	rs1056441	chr20:62370349	chr20:63738996	C/T	Number of self-reported non-cancer illnesses	EFO_0009801	Neale B	UKBB	European	2017	0.007766	0.002135	0.0002757	+	337159	1	-	Neale-B_UKBB_EUR_2017
rs1056441	rs1056441	chr20:62370349	chr20:63738996	C/T	Number of self-reported non-cancer illnesses	EFO_0009801	Neale B	UKBB	European	2017	0.007758	0.002135	0.0002798	+	337159	1	-	Neale-B_UKBB_EUR_2017
rs1056441	rs1056441	chr20:62370349	chr20:63738996	C/T	Number of self-reported non-cancer illnesses	EFO_0009801	Neale B	UKBB	European	2017	0.00775	0.002135	0.0002839	+	337159	1	-	Neale-B_UKBB_EUR_2017
rs1056441	rs1056441	chr20:62370349	chr20:63738996	C/T	Number of self-reported non-cancer illnesses	EFO_0009801	Neale B	UKBB	European	2017	0.007748	0.002135	0.0002845	+	337159	1	-	Neale-B_UKBB_EUR_2017
rs1056441	rs1056441	chr20:62370349	chr20:63738996	C/T	Ulcerative colitis	EFO_0000729	Neale B	UKBB	European	2017	0.000639	0.0001761	0.0002862	+	337199	1	risk diff	Neale-B_UKBB_EUR_2017
rs1056441	rs1056441	chr20:62370349	chr20:63738996	C/T	Eosinophil count	EFO_0004586	Astle W	27863252	European	2016	0.01368	0.003774	0.000289	+	173480	2	IVNT	Astle-W_Blood-Cell-Traits_EUR_2016
rs1056441	rs1056441	chr20:62370349	chr20:63738996	C/T	Self-reported asthma	EFO_0000270	Neale B	UKBB	European	2017	0.003007	0.0008298	0.0002905	+	337159	1	risk diff	Neale-B_UKBB_EUR_2017
rs1056441	rs1056441	chr20:62370349	chr20:63738996	C/T	Ulcerative colitis	EFO_0000729	Neale B	UKBB	European	2017	0.0006381	0.0001761	0.0002905	+	337199	1	risk diff	Neale-B_UKBB_EUR_2017
rs1056441	rs1056441	chr20:62370349	chr20:63738996	C/T	Monocyte count	EFO_0004586	Astle W	27863252	European	2016	0.0137	0.003783	0.0002932	+	173480	2	IVNT	Astle-W_Blood-Cell-Traits_EUR_2016
rs1056441	rs1056441	chr20:62370349	chr20:63738996	C/T	Pulse rate	EFO_0004326	Neale B	UKBB	European	2017	0.00959	0.002649	0.0002939	+	317756	1	IVNT	Neale-B_UKBB_EUR_2017
rs1056441	rs1056441	chr20:62370349	chr20:63738996	C/T	Ulcerative colitis	EFO_0000729	Neale B	UKBB	European	2017	0.0006376	0.0001761	0.0002943	+	337199	1	risk diff	Neale-B_UKBB_EUR_2017
rs1056441	rs1056441	chr20:62370349	chr20:63738996	C/T	Ulcerative colitis	EFO_0000729	Neale B	UKBB	European	2017	0.0006374	0.0001761	0.0002953	+	337199	1	risk diff	Neale-B_UKBB_EUR_2017
rs1056441	rs1056441	chr20:62370349	chr20:63738996	C/T	log Urinary albumin creatinine ratio	EFO_0007778	CKDGen	21355061	European	2011	NA	NA	0.0003	+	31580	12	mg/g	CKDGen_UACR_EUR_2011
rs1056441	rs1056441	chr20:62370349	chr20:63738996	C/T	Urinary albumin to creatinine ratio	EFO_0007778	CKDGen	21355061	European	2011	NA	NA	0.0003	NA	31580	-	-	GRASP
rs1056441	rs1056441	chr20:62370349	chr20:63738996	C/T	Ulcerative colitis	EFO_0000729	Neale B	UKBB	European	2017	0.0006373	0.0001764	0.0003027	+	337199	1	risk diff	Neale-B_UKBB_EUR_2017
rs1056441	rs1056441	chr20:62370349	chr20:63738996	C/T	Self-reported asthma	EFO_0000270	Neale B	UKBB	European	2017	0.002997	0.0008296	0.0003032	+	337159	1	risk diff	Neale-B_UKBB_EUR_2017
rs1056441	rs1056441	chr20:62370349	chr20:63738996	C/T	Self-reported asthma	EFO_0000270	Neale B	UKBB	European	2017	0.002994	0.0008296	0.0003071	+	337159	1	risk diff	Neale-B_UKBB_EUR_2017
rs1056441	rs1056441	chr20:62370349	chr20:63738996	C/T	Long-standing illness, disability or infirmity	-	Neale B	UKBB	European	2017	0.00443	0.001227	0.0003075	+	329663	1	risk diff	Neale-B_UKBB_EUR_2017
rs1056441	rs1056441	chr20:62370349	chr20:63738996	C/T	White blood cell count	EFO_0004586	Astle W	27863252	European	2016	0.0137	0.003796	0.0003077	+	173480	2	IVNT	Astle-W_Blood-Cell-Traits_EUR_2016
rs1056441	rs1056441	chr20:62370349	chr20:63738996	C/T	Self-reported asthma	EFO_0000270	Neale B	UKBB	European	2017	0.002994	0.0008301	0.0003103	+	337159	1	risk diff	Neale-B_UKBB_EUR_2017
rs1056441	rs1056441	chr20:62370349	chr20:63738996	C/T	White blood cell count	EFO_0004586	Astle W	27863252	European	2016	0.01368	0.003796	0.000312	+	173480	2	IVNT	Astle-W_Blood-Cell-Traits_EUR_2016
rs1056441	rs1056441	chr20:62370349	chr20:63738996	C/T	Treatment with dexamethasone	EFO_0007056	Neale B	UKBB	European	2017	0.0001509	4.19e-05	0.0003147	+	337159	1	risk diff	Neale-B_UKBB_EUR_2017
rs1056441	rs1056441	chr20:62370349	chr20:63738996	C/T	Self-reported asthma	EFO_0000270	Neale B	UKBB	European	2017	0.002988	0.0008297	0.0003172	+	337159	1	risk diff	Neale-B_UKBB_EUR_2017
rs1056441	rs1056441	chr20:62370349	chr20:63738996	C/T	Standardized difference in height between age 14 years and adult in females	-	EGGC	23449627	European	2013	0.08264	0.02293	0.0003174	+	4946	5	SDS	EGGC_Puberty-Growth-PTF_EUR_2013
rs1056441	rs1056441	chr20:62370349	chr20:63738996	C/T	White blood cell count	EFO_0004586	Astle W	27863252	European	2016	0.01365	0.003793	0.000321	+	173480	2	IVNT	Astle-W_Blood-Cell-Traits_EUR_2016
rs1056441	rs1056441	chr20:62370349	chr20:63738996	C/T	Self-reported asthma	EFO_0000270	Neale B	UKBB	European	2017	0.002982	0.0008297	0.0003247	+	337159	1	risk diff	Neale-B_UKBB_EUR_2017
rs1056441	rs1056441	chr20:62370349	chr20:63738996	C/T	Self-reported asthma	EFO_0000270	Neale B	UKBB	European	2017	0.002978	0.0008296	0.0003306	+	337159	1	risk diff	Neale-B_UKBB_EUR_2017
rs1056441	rs1056441	chr20:62370349	chr20:63738996	C/T	Impedance of leg left	-	Neale B	UKBB	European	2017	0.008413	0.002345	0.0003331	+	331296	1	IVNT	Neale-B_UKBB_EUR_2017
rs1056441	rs1056441	chr20:62370349	chr20:63738996	C/T	Self-reported prostate cancer	EFO_0001663	Neale B	UKBB	European	2017	0.0007941	0.0002214	0.000334	+	337159	1	risk diff	Neale-B_UKBB_EUR_2017
rs1056441	rs1056441	chr20:62370349	chr20:63738996	C/T	Treatment with dexamethasone	EFO_0007056	Neale B	UKBB	European	2017	0.0001502	4.19e-05	0.0003343	+	337159	1	risk diff	Neale-B_UKBB_EUR_2017
rs1056441	rs1056441	chr20:62370349	chr20:63738996	C/T	Self-reported asthma	EFO_0000270	Neale B	UKBB	European	2017	0.002975	0.0008297	0.0003357	+	337159	1	risk diff	Neale-B_UKBB_EUR_2017
rs1056441	rs1056441	chr20:62370349	chr20:63738996	C/T	Monocyte count	EFO_0004586	Astle W	27863252	European	2016	0.01367	0.003815	0.0003381	+	173480	2	IVNT	Astle-W_Blood-Cell-Traits_EUR_2016
rs1056441	rs1056441	chr20:62370349	chr20:63738996	C/T	Eosinophil count	EFO_0004586	Astle W	27863252	European	2016	0.01352	0.003773	0.0003383	+	173480	2	IVNT	Astle-W_Blood-Cell-Traits_EUR_2016
rs1056441	rs1056441	chr20:62370349	chr20:63738996	C/T	Self-reported asthma	EFO_0000270	Neale B	UKBB	European	2017	0.002973	0.0008296	0.0003386	+	337159	1	risk diff	Neale-B_UKBB_EUR_2017
rs1056441	rs1056441	chr20:62370349	chr20:63738996	C/T	Self-reported prostate cancer	EFO_0001663	Neale B	UKBB	European	2017	0.0007938	0.0002215	0.0003388	+	337159	1	risk diff	Neale-B_UKBB_EUR_2017
rs1056441	rs1056441	chr20:62370349	chr20:63738996	C/T	White blood cell count	EFO_0004586	Astle W	27863252	European	2016	0.01359	0.003792	0.0003391	+	173480	2	IVNT	Astle-W_Blood-Cell-Traits_EUR_2016
rs1056441	rs1056441	chr20:62370349	chr20:63738996	C/T	Self-reported prostate cancer	EFO_0001663	Neale B	UKBB	European	2017	0.0007939	0.0002216	0.0003394	+	337159	1	risk diff	Neale-B_UKBB_EUR_2017
rs1056441	rs1056441	chr20:62370349	chr20:63738996	C/T	White blood cell count	EFO_0004586	Astle W	27863252	European	2016	0.01359	0.003793	0.0003396	+	173480	2	IVNT	Astle-W_Blood-Cell-Traits_EUR_2016
rs1056441	rs1056441	chr20:62370349	chr20:63738996	C/T	Long-standing illness, disability or infirmity	-	Neale B	UKBB	European	2017	0.004395	0.001227	0.0003425	+	329663	1	risk diff	Neale-B_UKBB_EUR_2017
rs1056441	rs1056441	chr20:62370349	chr20:63738996	C/T	Treatment with dexamethasone	EFO_0007056	Neale B	UKBB	European	2017	0.0001501	4.19e-05	0.0003425	+	337159	1	risk diff	Neale-B_UKBB_EUR_2017
rs1056441	rs1056441	chr20:62370349	chr20:63738996	C/T	Treatment with dexamethasone	EFO_0007056	Neale B	UKBB	European	2017	0.0001501	4.19e-05	0.000343	+	337159	1	risk diff	Neale-B_UKBB_EUR_2017
rs1056441	rs1056441	chr20:62370349	chr20:63738996	C/T	Treatment with dexamethasone	EFO_0007056	Neale B	UKBB	European	2017	0.00015	4.19e-05	0.0003444	+	337159	1	risk diff	Neale-B_UKBB_EUR_2017
rs1056441	rs1056441	chr20:62370349	chr20:63738996	C/T	White blood cell count	EFO_0004586	Astle W	27863252	European	2016	0.01357	0.003792	0.0003469	+	173480	2	IVNT	Astle-W_Blood-Cell-Traits_EUR_2016
rs1056441	rs1056441	chr20:62370349	chr20:63738996	C/T	log Urinary albumin creatinine ratio	EFO_0007778	CKDGen	21355061	European	2011	NA	NA	0.00035	+	31580	12	mg/g	CKDGen_UACR_EUR_2011
rs1056441	rs1056441	chr20:62370349	chr20:63738996	C/T	Urinary albumin to creatinine ratio	EFO_0007778	CKDGen	21355061	European	2011	NA	NA	0.00035	NA	31580	-	-	GRASP
rs1056441	rs1056441	chr20:62370349	chr20:63738996	C/T	Treatment with dexamethasone	EFO_0007056	Neale B	UKBB	European	2017	0.00015	4.2e-05	0.0003519	+	337159	1	risk diff	Neale-B_UKBB_EUR_2017
rs1056441	rs1056441	chr20:62370349	chr20:63738996	C/T	Monocyte count	EFO_0004586	Astle W	27863252	European	2016	0.0135	0.003781	0.0003572	+	173480	2	IVNT	Astle-W_Blood-Cell-Traits_EUR_2016
rs1056441	rs1056441	chr20:62370349	chr20:63738996	C/T	Treatment with dexamethasone	EFO_0007056	Neale B	UKBB	European	2017	0.0001497	4.19e-05	0.0003572	+	337159	1	risk diff	Neale-B_UKBB_EUR_2017
rs1056441	rs1056441	chr20:62370349	chr20:63738996	C/T	Treatment with dexamethasone	EFO_0007056	Neale B	UKBB	European	2017	0.0001496	4.19e-05	0.0003582	+	337159	1	risk diff	Neale-B_UKBB_EUR_2017
rs1056441	rs1056441	chr20:62370349	chr20:63738996	C/T	Self-reported prostate cancer	EFO_0001663	Neale B	UKBB	European	2017	0.0007896	0.0002213	0.0003603	+	337159	1	risk diff	Neale-B_UKBB_EUR_2017
rs1056441	rs1056441	chr20:62370349	chr20:63738996	C/T	Self-reported asthma	EFO_0000270	Neale B	UKBB	European	2017	0.002957	0.0008312	0.0003745	+	337159	1	risk diff	Neale-B_UKBB_EUR_2017
rs1056441	rs1056441	chr20:62370349	chr20:63738996	C/T	Long-standing illness, disability or infirmity	-	Neale B	UKBB	European	2017	0.00436	0.001226	0.0003779	+	329663	1	risk diff	Neale-B_UKBB_EUR_2017
rs1056441	rs1056441	chr20:62370349	chr20:63738996	C/T	Monocyte count	EFO_0004586	Astle W	27863252	European	2016	0.01345	0.003784	0.0003794	+	173480	2	IVNT	Astle-W_Blood-Cell-Traits_EUR_2016
rs1056441	rs1056441	chr20:62370349	chr20:63738996	C/T	Self-reported asthma	EFO_0000270	Neale B	UKBB	European	2017	0.00295	0.0008303	0.0003811	+	337159	1	risk diff	Neale-B_UKBB_EUR_2017
rs1056441	rs1056441	chr20:62370349	chr20:63738996	C/T	Self-reported asthma	EFO_0000270	Neale B	UKBB	European	2017	0.002946	0.0008305	0.0003894	+	337159	1	risk diff	Neale-B_UKBB_EUR_2017
rs1056441	rs1056441	chr20:62370349	chr20:63738996	C/T	White blood cell count	EFO_0004586	Astle W	27863252	European	2016	0.01351	0.003814	0.0003963	+	173480	2	IVNT	Astle-W_Blood-Cell-Traits_EUR_2016
rs1056441	rs1056441	chr20:62370349	chr20:63738996	C/T	Pain type experienced in last month: none of the above	EFO_0003843	Neale B	UKBB	European	2017	-0.004675	0.00132	0.0003966	-	336650	1	risk diff	Neale-B_UKBB_EUR_2017
rs1056441	rs1056441	chr20:62370349	chr20:63738996	C/T	Long-standing illness, disability or infirmity	-	Neale B	UKBB	European	2017	0.004334	0.001226	0.0004089	+	329663	1	risk diff	Neale-B_UKBB_EUR_2017
rs1056441	rs1056441	chr20:62370349	chr20:63738996	C/T	log Urinary albumin creatinine ratio	EFO_0007778	CKDGen	21355061	European	2011	NA	NA	0.00041	+	31580	12	mg/g	CKDGen_UACR_EUR_2011
rs1056441	rs1056441	chr20:62370349	chr20:63738996	C/T	Urinary albumin to creatinine ratio	EFO_0007778	CKDGen	21355061	European	2011	NA	NA	0.00041	NA	31580	-	-	GRASP
rs1056441	rs1056441	chr20:62370349	chr20:63738996	C/T	log Urinary albumin creatinine ratio	EFO_0007778	CKDGen	21355061	European	2011	NA	NA	0.00041	+	31580	12	mg/g	CKDGen_UACR_EUR_2011
rs1056441	rs1056441	chr20:62370349	chr20:63738996	C/T	Urinary albumin to creatinine ratio	EFO_0007778	CKDGen	21355061	European	2011	NA	NA	0.00041	NA	31580	-	-	GRASP
rs1056441	rs1056441	chr20:62370349	chr20:63738996	C/T	Other specific joint derangements	-	Neale B	UKBB	European	2017	0.0004565	0.0001292	0.0004113	+	337199	1	risk diff	Neale-B_UKBB_EUR_2017
rs1056441	rs1056441	chr20:62370349	chr20:63738996	C/T	Self-reported prostate cancer	EFO_0001663	Neale B	UKBB	European	2017	0.0007814	0.0002213	0.0004148	+	337159	1	risk diff	Neale-B_UKBB_EUR_2017
rs1056441	rs1056441	chr20:62370349	chr20:63738996	C/T	Usual walking pace	EFO_0008002	Neale B	UKBB	European	2017	-0.005542	0.001571	0.0004195	-	335349	1	-	Neale-B_UKBB_EUR_2017
rs1056441	rs1056441	chr20:62370349	chr20:63738996	C/T	Other specific joint derangements	-	Neale B	UKBB	European	2017	0.000455	0.0001292	0.0004264	+	337199	1	risk diff	Neale-B_UKBB_EUR_2017
rs1056441	rs1056441	chr20:62370349	chr20:63738996	C/T	Self-reported prostate cancer	EFO_0001663	Neale B	UKBB	European	2017	0.0007811	0.0002217	0.0004278	+	337159	1	risk diff	Neale-B_UKBB_EUR_2017
rs1056441	rs1056441	chr20:62370349	chr20:63738996	C/T	Long-standing illness, disability or infirmity	-	Neale B	UKBB	European	2017	0.004317	0.001226	0.000431	+	329663	1	risk diff	Neale-B_UKBB_EUR_2017
rs1056441	rs1056441	chr20:62370349	chr20:63738996	C/T	Long-standing illness, disability or infirmity	-	Neale B	UKBB	European	2017	0.004314	0.001226	0.0004347	+	329663	1	risk diff	Neale-B_UKBB_EUR_2017
rs1056441	rs1056441	chr20:62370349	chr20:63738996	C/T	Monocyte count	EFO_0004586	Astle W	27863252	European	2016	0.01329	0.00378	0.0004363	+	173480	2	IVNT	Astle-W_Blood-Cell-Traits_EUR_2016
rs1056441	rs1056441	chr20:62370349	chr20:63738996	C/T	Monocyte count	EFO_0004586	Astle W	27863252	European	2016	0.01329	0.003781	0.0004375	+	173480	2	IVNT	Astle-W_Blood-Cell-Traits_EUR_2016
rs1056441	rs1056441	chr20:62370349	chr20:63738996	C/T	Other specific joint derangements	-	Neale B	UKBB	European	2017	0.000454	0.0001291	0.0004377	+	337199	1	risk diff	Neale-B_UKBB_EUR_2017
rs1056441	rs1056441	chr20:62370349	chr20:63738996	C/T	Other specific joint derangements	-	Neale B	UKBB	European	2017	0.0004544	0.0001294	0.0004442	+	337199	1	risk diff	Neale-B_UKBB_EUR_2017
rs1056441	rs1056441	chr20:62370349	chr20:63738996	C/T	Body mass index	EFO_0004340	Neale B	UKBB	European	2017	0.008926	0.002542	0.000445	+	336107	1	IVNT	Neale-B_UKBB_EUR_2017
rs1056441	rs1056441	chr20:62370349	chr20:63738996	C/T	Self-reported prostate cancer	EFO_0001663	Neale B	UKBB	European	2017	0.0007769	0.0002213	0.0004478	+	337159	1	risk diff	Neale-B_UKBB_EUR_2017
rs1056441	rs1056441	chr20:62370349	chr20:63738996	C/T	Monocyte count	EFO_0004586	Astle W	27863252	European	2016	0.01327	0.00378	0.000448	+	173480	2	IVNT	Astle-W_Blood-Cell-Traits_EUR_2016
rs1056441	rs1056441	chr20:62370349	chr20:63738996	C/T	log Urinary albumin creatinine ratio	EFO_0007778	CKDGen	21355061	European	2011	NA	NA	0.00045	+	31580	12	mg/g	CKDGen_UACR_EUR_2011
rs1056441	rs1056441	chr20:62370349	chr20:63738996	C/T	Urinary albumin to creatinine ratio	EFO_0007778	CKDGen	21355061	European	2011	NA	NA	0.00045	NA	31580	-	-	GRASP
rs1056441	rs1056441	chr20:62370349	chr20:63738996	C/T	Self-reported prostate cancer	EFO_0001663	Neale B	UKBB	European	2017	0.0007765	0.0002213	0.0004514	+	337159	1	risk diff	Neale-B_UKBB_EUR_2017
rs1056441	rs1056441	chr20:62370349	chr20:63738996	C/T	Self-reported prostate cancer	EFO_0001663	Neale B	UKBB	European	2017	0.0007765	0.0002213	0.0004514	+	337159	1	risk diff	Neale-B_UKBB_EUR_2017
rs1056441	rs1056441	chr20:62370349	chr20:63738996	C/T	Self-reported prostate cancer	EFO_0001663	Neale B	UKBB	European	2017	0.0007762	0.0002213	0.0004535	+	337159	1	risk diff	Neale-B_UKBB_EUR_2017
rs1056441	rs1056441	chr20:62370349	chr20:63738996	C/T	Ulcerative colitis	EFO_0000729	Neale B	UKBB	European	2017	0.000621	0.0001771	0.0004536	+	337199	1	risk diff	Neale-B_UKBB_EUR_2017
rs1056441	rs1056441	chr20:62370349	chr20:63738996	C/T	Self-reported malabsorption or coeliac disease	EFO_0001060	Neale B	UKBB	European	2017	-0.0006169	0.000176	0.0004558	-	337159	1	risk diff	Neale-B_UKBB_EUR_2017
rs1056441	rs1056441	chr20:62370349	chr20:63738996	C/T	Total cholesterol	EFO_0004574	GLGC	24097068	European	2013	-0.0155	0.004	0.0004599	-	187365	60	IVNT	GLGC_TC_EUR_2013
rs1056441	rs1056441	chr20:62370349	chr20:63738996	C/T	Monocyte count	EFO_0004586	Astle W	27863252	European	2016	0.01325	0.003783	0.0004632	+	173480	2	IVNT	Astle-W_Blood-Cell-Traits_EUR_2016
rs1056441	rs1056441	chr20:62370349	chr20:63738996	C/T	Treatment with domperidone	EFO_0007056	Neale B	UKBB	European	2017	0.0004208	0.0001202	0.000464	+	337159	1	risk diff	Neale-B_UKBB_EUR_2017
rs1056441	rs1056441	chr20:62370349	chr20:63738996	C/T	Long-standing illness, disability or infirmity	-	Neale B	UKBB	European	2017	0.004286	0.001226	0.0004743	+	329663	1	risk diff	Neale-B_UKBB_EUR_2017
rs1056441	rs1056441	chr20:62370349	chr20:63738996	C/T	Long-standing illness, disability or infirmity	-	Neale B	UKBB	European	2017	0.004286	0.001226	0.0004745	+	329663	1	risk diff	Neale-B_UKBB_EUR_2017
rs1056441	rs1056441	chr20:62370349	chr20:63738996	C/T	Sum eosinophil basophil counts	EFO_0004586	Astle W	27863252	European	2016	0.0132	0.003778	0.0004753	+	173480	2	IVNT	Astle-W_Blood-Cell-Traits_EUR_2016
rs1056441	rs1056441	chr20:62370349	chr20:63738996	C/T	Long-standing illness, disability or infirmity	-	Neale B	UKBB	European	2017	0.004285	0.001226	0.0004755	+	329663	1	risk diff	Neale-B_UKBB_EUR_2017
rs1056441	rs1056441	chr20:62370349	chr20:63738996	C/T	Long-standing illness, disability or infirmity	-	Neale B	UKBB	European	2017	0.004285	0.001226	0.0004761	+	329663	1	risk diff	Neale-B_UKBB_EUR_2017
rs1056441	rs1056441	chr20:62370349	chr20:63738996	C/T	Long-standing illness, disability or infirmity	-	Neale B	UKBB	European	2017	0.004263	0.00122	0.0004762	+	329663	1	risk diff	Neale-B_UKBB_EUR_2017
rs1056441	rs1056441	chr20:62370349	chr20:63738996	C/T	White blood cell count	EFO_0004586	Astle W	27863252	European	2016	0.01333	0.003816	0.0004763	+	173480	2	IVNT	Astle-W_Blood-Cell-Traits_EUR_2016
rs1056441	rs1056441	chr20:62370349	chr20:63738996	C/T	Self-reported prostate cancer	EFO_0001663	Neale B	UKBB	European	2017	0.0007723	0.0002214	0.0004858	+	337159	1	risk diff	Neale-B_UKBB_EUR_2017
rs1056441	rs1056441	chr20:62370349	chr20:63738996	C/T	Poisoning by nonopioid analgesics, antipyretics and antirheumatics	EFO_0008546	Neale B	UKBB	European	2017	0.0004537	0.0001301	0.0004873	+	337199	1	risk diff	Neale-B_UKBB_EUR_2017
rs1056441	rs1056441	chr20:62370349	chr20:63738996	C/T	log Urinary albumin creatinine ratio	EFO_0007778	CKDGen	21355061	European	2011	NA	NA	0.00049	+	31580	12	mg/g	CKDGen_UACR_EUR_2011
rs1056441	rs1056441	chr20:62370349	chr20:63738996	C/T	Urinary albumin to creatinine ratio	EFO_0007778	CKDGen	21355061	European	2011	NA	NA	0.00049	NA	31580	-	-	GRASP
rs1056441	rs1056441	chr20:62370349	chr20:63738996	C/T	log Urinary albumin creatinine ratio	EFO_0007778	CKDGen	21355061	European	2011	NA	NA	0.00049	+	31580	12	mg/g	CKDGen_UACR_EUR_2011
rs1056441	rs1056441	chr20:62370349	chr20:63738996	C/T	Urinary albumin to creatinine ratio	EFO_0007778	CKDGen	21355061	European	2011	NA	NA	0.00049	NA	31580	-	-	GRASP
rs1056441	rs1056441	chr20:62370349	chr20:63738996	C/T	Other specific joint derangements	-	Neale B	UKBB	European	2017	0.0004498	0.0001291	0.000496	+	337199	1	risk diff	Neale-B_UKBB_EUR_2017
rs1056441	rs1056441	chr20:62370349	chr20:63738996	C/T	Body mass index	EFO_0004340	Neale B	UKBB	European	2017	0.008853	0.002542	0.0004961	+	336107	1	IVNT	Neale-B_UKBB_EUR_2017
rs1056441	rs1056441	chr20:62370349	chr20:63738996	C/T	Other specific joint derangements	-	Neale B	UKBB	European	2017	0.0004497	0.0001291	0.0004964	+	337199	1	risk diff	Neale-B_UKBB_EUR_2017
rs1056441	rs1056441	chr20:62370349	chr20:63738996	C/T	Sum eosinophil basophil counts	EFO_0004586	Astle W	27863252	European	2016	0.01315	0.003776	0.0004972	+	173480	2	IVNT	Astle-W_Blood-Cell-Traits_EUR_2016
rs1056441	rs1056441	chr20:62370349	chr20:63738996	C/T	log Urinary albumin creatinine ratio	EFO_0007778	CKDGen	21355061	European	2011	NA	NA	0.0005	+	31580	12	mg/g	CKDGen_UACR_EUR_2011
rs1056441	rs1056441	chr20:62370349	chr20:63738996	C/T	Urinary albumin to creatinine ratio	EFO_0007778	CKDGen	21355061	European	2011	NA	NA	0.0005	NA	31580	-	-	GRASP
rs1056441	rs1056441	chr20:62370349	chr20:63738996	C/T	Other specific joint derangements	-	Neale B	UKBB	European	2017	0.0004495	0.0001291	0.0005006	+	337199	1	risk diff	Neale-B_UKBB_EUR_2017
rs1056441	rs1056441	chr20:62370349	chr20:63738996	C/T	Standardized difference in height between age 14 years and adult in females	-	EGGC	23449627	European	2013	0.07912	0.02271	0.000501	+	4946	5	SDS	EGGC_Puberty-Growth-PTF_EUR_2013
rs1056441	rs1056441	chr20:62370349	chr20:63738996	C/T	Other specific joint derangements	-	Neale B	UKBB	European	2017	0.0004493	0.0001291	0.0005029	+	337199	1	risk diff	Neale-B_UKBB_EUR_2017
rs1056441	rs1056441	chr20:62370349	chr20:63738996	C/T	Other specific joint derangements	-	Neale B	UKBB	European	2017	0.0004492	0.0001291	0.0005045	+	337199	1	risk diff	Neale-B_UKBB_EUR_2017
rs1056441	rs1056441	chr20:62370349	chr20:63738996	C/T	Poisoning by nonopioid analgesics, antipyretics and antirheumatics	EFO_0008546	Neale B	UKBB	European	2017	0.0004524	0.0001301	0.0005067	+	337199	1	risk diff	Neale-B_UKBB_EUR_2017
rs1056441	rs1056441	chr20:62370349	chr20:63738996	C/T	Other hearing loss	EFO_0004238	Neale B	UKBB	European	2017	0.0002514	7.23e-05	0.0005068	+	337199	1	risk diff	Neale-B_UKBB_EUR_2017
rs1056441	rs1056441	chr20:62370349	chr20:63738996	C/T	Long-standing illness, disability or infirmity	-	Neale B	UKBB	European	2017	0.004242	0.00122	0.0005074	+	329663	1	risk diff	Neale-B_UKBB_EUR_2017
rs1056441	rs1056441	chr20:62370349	chr20:63738996	C/T	White blood cell count	EFO_0004586	Astle W	27863252	European	2016	0.01325	0.003814	0.0005103	+	173480	2	IVNT	Astle-W_Blood-Cell-Traits_EUR_2016
rs1056441	rs1056441	chr20:62370349	chr20:63738996	C/T	Long-standing illness, disability or infirmity	-	Neale B	UKBB	European	2017	0.004262	0.001227	0.0005136	+	329663	1	risk diff	Neale-B_UKBB_EUR_2017
rs1056441	rs1056441	chr20:62370349	chr20:63738996	C/T	Ulcerative colitis	EFO_0000729	Neale B	UKBB	European	2017	0.0006141	0.000177	0.0005234	+	337199	1	risk diff	Neale-B_UKBB_EUR_2017
rs1056441	rs1056441	chr20:62370349	chr20:63738996	C/T	Self-reported prostate cancer	EFO_0001663	Neale B	UKBB	European	2017	0.000768	0.0002215	0.0005249	+	337159	1	risk diff	Neale-B_UKBB_EUR_2017
rs1056441	rs1056441	chr20:62370349	chr20:63738996	C/T	Treatment with dexamethasone	EFO_0007056	Neale B	UKBB	European	2017	0.0001452	4.19e-05	0.0005333	+	337159	1	risk diff	Neale-B_UKBB_EUR_2017
rs1056441	rs1056441	chr20:62370349	chr20:63738996	C/T	White blood cell count	EFO_0004586	Astle W	27863252	European	2016	0.0132	0.003814	0.0005362	+	173480	2	IVNT	Astle-W_Blood-Cell-Traits_EUR_2016
rs1056441	rs1056441	chr20:62370349	chr20:63738996	C/T	Other hearing loss	EFO_0004238	Neale B	UKBB	European	2017	0.0002506	7.24e-05	0.0005383	+	337199	1	risk diff	Neale-B_UKBB_EUR_2017
rs1056441	rs1056441	chr20:62370349	chr20:63738996	C/T	Lumber spine bone mineral density	EFO_0007701	GEFOS	26367794	European	2015	0.03358	0.009473	0.00054	+	28498	12	Z-score	GEFOS_LSBMD_EUR_2015
rs1056441	rs1056441	chr20:62370349	chr20:63738996	C/T	White blood cell count	EFO_0004586	Astle W	27863252	European	2016	0.01324	0.003829	0.0005413	+	173480	2	IVNT	Astle-W_Blood-Cell-Traits_EUR_2016
rs1056441	rs1056441	chr20:62370349	chr20:63738996	C/T	Standardized difference in height between age 14 years and adult in females	-	EGGC	23449627	European	2013	0.07857	0.0227	0.0005439	+	4946	5	SDS	EGGC_Puberty-Growth-PTF_EUR_2013
rs1056441	rs1056441	chr20:62370349	chr20:63738996	C/T	Red blood cell count	EFO_0004586	Astle W	27863252	European	2016	0.01299	0.003763	0.0005549	+	173480	2	IVNT	Astle-W_Blood-Cell-Traits_EUR_2016
rs1056441	rs1056441	chr20:62370349	chr20:63738996	C/T	Other specific joint derangements	-	Neale B	UKBB	European	2017	0.0004435	0.0001285	0.0005568	+	337199	1	risk diff	Neale-B_UKBB_EUR_2017
rs1056441	rs1056441	chr20:62370349	chr20:63738996	C/T	Glioma	EFO_0000326;EFO_0005543	GliomaScan	22886559	European	2012	NA	NA	0.0005594	NA	6811	18	log OR	GliomaScan_Glioma_EUR_2012
rs1056441	rs1056441	chr20:62370349	chr20:63738996	C/T	Body mass index variability	EFO_0004340	GIANT	22982992	European	2012	0.021	0.0061	0.00056	+	127612	38	Z-score2	GIANT_BMI-Var_EUR_2012
rs1056441	rs1056441	chr20:62370349	chr20:63738996	C/T	Impedance of leg left	-	Neale B	UKBB	European	2017	0.008081	0.002343	0.0005609	+	331296	1	IVNT	Neale-B_UKBB_EUR_2017
rs1056441	rs1056441	chr20:62370349	chr20:63738996	C/T	Red blood cell count	EFO_0004586	Astle W	27863252	European	2016	0.01297	0.003763	0.0005654	+	173480	2	IVNT	Astle-W_Blood-Cell-Traits_EUR_2016
rs1056441	rs1056441	chr20:62370349	chr20:63738996	C/T	Other specific joint derangements	-	Neale B	UKBB	European	2017	0.0004422	0.0001285	0.0005781	+	337199	1	risk diff	Neale-B_UKBB_EUR_2017
rs1056441	rs1056441	chr20:62370349	chr20:63738996	C/T	Basal metabolic rate	EFO_0007777	Neale B	UKBB	European	2017	0.005904	0.001715	0.0005783	+	331307	1	IVNT	Neale-B_UKBB_EUR_2017
rs1056441	rs1056441	chr20:62370349	chr20:63738996	C/T	Other specific joint derangements	-	Neale B	UKBB	European	2017	0.0004442	0.0001291	0.0005821	+	337199	1	risk diff	Neale-B_UKBB_EUR_2017
rs1056441	rs1056441	chr20:62370349	chr20:63738996	C/T	Impedance of leg left	-	Neale B	UKBB	European	2017	0.008057	0.002342	0.0005828	+	331296	1	IVNT	Neale-B_UKBB_EUR_2017
rs1056441	rs1056441	chr20:62370349	chr20:63738996	C/T	Standardized difference in height between age 14 years and adult in females	-	EGGC	23449627	European	2013	0.07803	0.02268	0.0005876	+	4946	5	SDS	EGGC_Puberty-Growth-PTF_EUR_2013
rs1056441	rs1056441	chr20:62370349	chr20:63738996	C/T	Long-standing illness, disability or infirmity	-	Neale B	UKBB	European	2017	0.004188	0.001219	0.0005899	+	329663	1	risk diff	Neale-B_UKBB_EUR_2017
rs1056441	rs1056441	chr20:62370349	chr20:63738996	C/T	Other specific joint derangements	-	Neale B	UKBB	European	2017	0.0004441	0.0001293	0.0005919	+	337199	1	risk diff	Neale-B_UKBB_EUR_2017
rs1056441	rs1056441	chr20:62370349	chr20:63738996	C/T	White blood cell count	EFO_0004586	Astle W	27863252	European	2016	0.01311	0.00382	0.0005974	+	173480	2	IVNT	Astle-W_Blood-Cell-Traits_EUR_2016
rs1056441	rs1056441	chr20:62370349	chr20:63738996	C/T	Weight	EFO_0004338	Neale B	UKBB	European	2017	0.008028	0.002341	0.0006039	+	336227	1	IVNT	Neale-B_UKBB_EUR_2017
rs1056441	rs1056441	chr20:62370349	chr20:63738996	C/T	Ulcerative colitis	EFO_0000729	Neale B	UKBB	European	2017	0.0006076	0.0001771	0.0006045	+	337199	1	risk diff	Neale-B_UKBB_EUR_2017
rs1056441	rs1056441	chr20:62370349	chr20:63738996	C/T	Long-standing illness, disability or infirmity	-	Neale B	UKBB	European	2017	0.004184	0.00122	0.0006051	+	329663	1	risk diff	Neale-B_UKBB_EUR_2017
rs1056441	rs1056441	chr20:62370349	chr20:63738996	C/T	Red blood cell count	EFO_0004586	Astle W	27863252	European	2016	0.01292	0.003767	0.0006053	+	173480	2	IVNT	Astle-W_Blood-Cell-Traits_EUR_2016
rs1056441	rs1056441	chr20:62370349	chr20:63738996	C/T	Ulcerative colitis	EFO_0000729	Neale B	UKBB	European	2017	0.000607	0.000177	0.0006072	+	337199	1	risk diff	Neale-B_UKBB_EUR_2017
rs1056441	rs1056441	chr20:62370349	chr20:63738996	C/T	Ulcerative colitis	EFO_0000729	Neale B	UKBB	European	2017	0.0006068	0.000177	0.0006088	+	337199	1	risk diff	Neale-B_UKBB_EUR_2017
rs1056441	rs1056441	chr20:62370349	chr20:63738996	C/T	Ulcerative colitis	EFO_0000729	Neale B	UKBB	European	2017	0.0006069	0.0001771	0.0006092	+	337199	1	risk diff	Neale-B_UKBB_EUR_2017
rs1056441	rs1056441	chr20:62370349	chr20:63738996	C/T	White blood cell count	EFO_0004586	Astle W	27863252	European	2016	0.01307	0.003815	0.000611	+	173480	2	IVNT	Astle-W_Blood-Cell-Traits_EUR_2016
rs1056441	rs1056441	chr20:62370349	chr20:63738996	C/T	Ulcerative colitis	EFO_0000729	Neale B	UKBB	European	2017	0.0006065	0.000177	0.000613	+	337199	1	risk diff	Neale-B_UKBB_EUR_2017
rs1056441	rs1056441	chr20:62370349	chr20:63738996	C/T	Ulcerative colitis	EFO_0000729	Neale B	UKBB	European	2017	0.0006065	0.000177	0.000614	+	337199	1	risk diff	Neale-B_UKBB_EUR_2017
rs1056441	rs1056441	chr20:62370349	chr20:63738996	C/T	Ulcerative colitis	EFO_0000729	Neale B	UKBB	European	2017	0.0006064	0.000177	0.0006147	+	337199	1	risk diff	Neale-B_UKBB_EUR_2017
rs1056441	rs1056441	chr20:62370349	chr20:63738996	C/T	Basal metabolic rate	EFO_0007777	Neale B	UKBB	European	2017	0.005874	0.001715	0.0006156	+	331307	1	IVNT	Neale-B_UKBB_EUR_2017
rs1056441	rs1056441	chr20:62370349	chr20:63738996	C/T	Long-standing illness, disability or infirmity	-	Neale B	UKBB	European	2017	0.004175	0.00122	0.0006185	+	329663	1	risk diff	Neale-B_UKBB_EUR_2017
rs1056441	rs1056441	chr20:62370349	chr20:63738996	C/T	Other general symptoms and signs	EFO_0003765	Neale B	UKBB	European	2017	-0.0001353	3.95e-05	0.0006186	-	337199	1	risk diff	Neale-B_UKBB_EUR_2017
rs1056441	rs1056441	chr20:62370349	chr20:63738996	C/T	Ulcerative colitis	EFO_0000729	Neale B	UKBB	European	2017	0.0006072	0.0001774	0.0006191	+	337199	1	risk diff	Neale-B_UKBB_EUR_2017
rs1056441	rs1056441	chr20:62370349	chr20:63738996	C/T	Long-standing illness, disability or infirmity	-	Neale B	UKBB	European	2017	0.004175	0.00122	0.0006193	+	329663	1	risk diff	Neale-B_UKBB_EUR_2017
rs1056441	rs1056441	chr20:62370349	chr20:63738996	C/T	Other specific joint derangements	-	Neale B	UKBB	European	2017	0.0004423	0.0001292	0.0006204	+	337199	1	risk diff	Neale-B_UKBB_EUR_2017
rs1056441	rs1056441	chr20:62370349	chr20:63738996	C/T	Standardized difference in height between age 14 years and adult in females	-	EGGC	23449627	European	2013	0.078	0.02277	0.0006218	+	4946	5	SDS	EGGC_Puberty-Growth-PTF_EUR_2013
rs1056441	rs1056441	chr20:62370349	chr20:63738996	C/T	Standardized difference in height between age 14 years and adult in females	-	EGGC	23449627	European	2013	0.07801	0.02279	0.0006253	+	4946	5	SDS	EGGC_Puberty-Growth-PTF_EUR_2013
rs1056441	rs1056441	chr20:62370349	chr20:63738996	C/T	Other specific joint derangements	-	Neale B	UKBB	European	2017	0.0004393	0.0001284	0.0006265	+	337199	1	risk diff	Neale-B_UKBB_EUR_2017
rs1056441	rs1056441	chr20:62370349	chr20:63738996	C/T	Red blood cell count	EFO_0004586	Astle W	27863252	European	2016	0.01287	0.003764	0.0006271	+	173480	2	IVNT	Astle-W_Blood-Cell-Traits_EUR_2016
rs1056441	rs1056441	chr20:62370349	chr20:63738996	C/T	Treatment with dexamethasone	EFO_0007056	Neale B	UKBB	European	2017	0.0001441	4.22e-05	0.0006319	+	337159	1	risk diff	Neale-B_UKBB_EUR_2017
rs1056441	rs1056441	chr20:62370349	chr20:63738996	C/T	Glioma	EFO_0000326;EFO_0005543	GliomaScan	22886559	European	2012	NA	NA	0.0006324	NA	6811	18	log OR	GliomaScan_Glioma_EUR_2012
rs1056441	rs1056441	chr20:62370349	chr20:63738996	C/T	Treatment with dexamethasone	EFO_0007056	Neale B	UKBB	European	2017	0.0001441	4.22e-05	0.0006339	+	337159	1	risk diff	Neale-B_UKBB_EUR_2017
rs1056441	rs1056441	chr20:62370349	chr20:63738996	C/T	Long-standing illness, disability or infirmity	-	Neale B	UKBB	European	2017	0.004167	0.00122	0.0006344	+	329663	1	risk diff	Neale-B_UKBB_EUR_2017
rs1056441	rs1056441	chr20:62370349	chr20:63738996	C/T	Poisoning by nonopioid analgesics, antipyretics and antirheumatics	EFO_0008546	Neale B	UKBB	European	2017	0.0004449	0.0001302	0.0006344	+	337199	1	risk diff	Neale-B_UKBB_EUR_2017
rs1056441	rs1056441	chr20:62370349	chr20:63738996	C/T	Treatment with domperidone	EFO_0007056	Neale B	UKBB	European	2017	0.000394	0.0001153	0.0006344	+	337159	1	risk diff	Neale-B_UKBB_EUR_2017
rs1056441	rs1056441	chr20:62370349	chr20:63738996	C/T	Treatment with dexamethasone	EFO_0007056	Neale B	UKBB	European	2017	0.0001438	4.21e-05	0.0006452	+	337159	1	risk diff	Neale-B_UKBB_EUR_2017
rs1056441	rs1056441	chr20:62370349	chr20:63738996	C/T	Standardized difference in height between age 14 years and adult in females	-	EGGC	23449627	European	2013	0.07747	0.02269	0.0006463	+	4946	5	SDS	EGGC_Puberty-Growth-PTF_EUR_2013
rs1056441	rs1056441	chr20:62370349	chr20:63738996	C/T	Treatment with dexamethasone	EFO_0007056	Neale B	UKBB	European	2017	0.0001437	4.21e-05	0.000647	+	337159	1	risk diff	Neale-B_UKBB_EUR_2017
rs1056441	rs1056441	chr20:62370349	chr20:63738996	C/T	White blood cell count	EFO_0004586	Astle W	27863252	European	2016	0.01301	0.003815	0.0006473	+	173480	2	IVNT	Astle-W_Blood-Cell-Traits_EUR_2016
rs1056441	rs1056441	chr20:62370349	chr20:63738996	C/T	Other specific joint derangements	-	Neale B	UKBB	European	2017	0.0004381	0.0001284	0.0006478	+	337199	1	risk diff	Neale-B_UKBB_EUR_2017
rs1056441	rs1056441	chr20:62370349	chr20:63738996	C/T	Treatment with dexamethasone	EFO_0007056	Neale B	UKBB	European	2017	0.0001437	4.21e-05	0.0006508	+	337159	1	risk diff	Neale-B_UKBB_EUR_2017
rs1056441	rs1056441	chr20:62370349	chr20:63738996	C/T	White blood cell count	EFO_0004586	Astle W	27863252	European	2016	0.013	0.003815	0.000655	+	173480	2	IVNT	Astle-W_Blood-Cell-Traits_EUR_2016
rs1056441	rs1056441	chr20:62370349	chr20:63738996	C/T	Treatment with dexamethasone	EFO_0007056	Neale B	UKBB	European	2017	0.0001436	4.21e-05	0.0006555	+	337159	1	risk diff	Neale-B_UKBB_EUR_2017
rs1056441	rs1056441	chr20:62370349	chr20:63738996	C/T	Treatment with dexamethasone	EFO_0007056	Neale B	UKBB	European	2017	0.0001436	4.21e-05	0.0006569	+	337159	1	risk diff	Neale-B_UKBB_EUR_2017
rs1056441	rs1056441	chr20:62370349	chr20:63738996	C/T	Treatment with dexamethasone	EFO_0007056	Neale B	UKBB	European	2017	0.0001436	4.21e-05	0.000657	+	337159	1	risk diff	Neale-B_UKBB_EUR_2017
rs1056441	rs1056441	chr20:62370349	chr20:63738996	C/T	Treatment with dexamethasone	EFO_0007056	Neale B	UKBB	European	2017	0.0001435	4.21e-05	0.0006581	+	337159	1	risk diff	Neale-B_UKBB_EUR_2017
rs1056441	rs1056441	chr20:62370349	chr20:63738996	C/T	White blood cell count	EFO_0004586	Astle W	27863252	European	2016	0.013	0.003816	0.0006594	+	173480	2	IVNT	Astle-W_Blood-Cell-Traits_EUR_2016
rs1056441	rs1056441	chr20:62370349	chr20:63738996	C/T	Other general symptoms and signs	EFO_0003765	Neale B	UKBB	European	2017	-0.0001343	3.95e-05	0.0006629	-	337199	1	risk diff	Neale-B_UKBB_EUR_2017
rs1056441	rs1056441	chr20:62370349	chr20:63738996	C/T	Treatment with dexamethasone	EFO_0007056	Neale B	UKBB	European	2017	0.0001435	4.22e-05	0.000663	+	337159	1	risk diff	Neale-B_UKBB_EUR_2017
rs1056441	rs1056441	chr20:62370349	chr20:63738996	C/T	Basal metabolic rate	EFO_0007777	Neale B	UKBB	European	2017	0.005845	0.001717	0.0006636	+	331307	1	IVNT	Neale-B_UKBB_EUR_2017
rs1056441	rs1056441	chr20:62370349	chr20:63738996	C/T	Treatment with dexamethasone	EFO_0007056	Neale B	UKBB	European	2017	0.0001434	4.21e-05	0.0006647	+	337159	1	risk diff	Neale-B_UKBB_EUR_2017
rs1056441	rs1056441	chr20:62370349	chr20:63738996	C/T	Other hearing loss	EFO_0004238	Neale B	UKBB	European	2017	0.000246	7.23e-05	0.0006677	+	337199	1	risk diff	Neale-B_UKBB_EUR_2017
rs1056441	rs1056441	chr20:62370349	chr20:63738996	C/T	Treatment with dexamethasone	EFO_0007056	Neale B	UKBB	European	2017	0.0001436	4.22e-05	0.00067	+	337159	1	risk diff	Neale-B_UKBB_EUR_2017
rs1056441	rs1056441	chr20:62370349	chr20:63738996	C/T	Other general symptoms and signs	EFO_0003765	Neale B	UKBB	European	2017	-0.0001341	3.94e-05	0.0006727	-	337199	1	risk diff	Neale-B_UKBB_EUR_2017
rs1056441	rs1056441	chr20:62370349	chr20:63738996	C/T	Other general symptoms and signs	EFO_0003765	Neale B	UKBB	European	2017	-0.0001342	3.95e-05	0.0006732	-	337199	1	risk diff	Neale-B_UKBB_EUR_2017
rs1056441	rs1056441	chr20:62370349	chr20:63738996	C/T	Other general symptoms and signs	EFO_0003765	Neale B	UKBB	European	2017	-0.0001341	3.94e-05	0.0006736	-	337199	1	risk diff	Neale-B_UKBB_EUR_2017
rs1056441	rs1056441	chr20:62370349	chr20:63738996	C/T	Other general symptoms and signs	EFO_0003765	Neale B	UKBB	European	2017	-0.0001341	3.94e-05	0.0006742	-	337199	1	risk diff	Neale-B_UKBB_EUR_2017
rs1056441	rs1056441	chr20:62370349	chr20:63738996	C/T	Other general symptoms and signs	EFO_0003765	Neale B	UKBB	European	2017	-0.000134	3.94e-05	0.0006782	-	337199	1	risk diff	Neale-B_UKBB_EUR_2017
rs1056441	rs1056441	chr20:62370349	chr20:63738996	C/T	Other general symptoms and signs	EFO_0003765	Neale B	UKBB	European	2017	-0.000134	3.95e-05	0.0006797	-	337199	1	risk diff	Neale-B_UKBB_EUR_2017
rs1056441	rs1056441	chr20:62370349	chr20:63738996	C/T	Other general symptoms and signs	EFO_0003765	Neale B	UKBB	European	2017	-0.0001339	3.94e-05	0.0006857	-	337199	1	risk diff	Neale-B_UKBB_EUR_2017
rs1056441	rs1056441	chr20:62370349	chr20:63738996	C/T	Other general symptoms and signs	EFO_0003765	Neale B	UKBB	European	2017	-0.0001339	3.95e-05	0.0006892	-	337199	1	risk diff	Neale-B_UKBB_EUR_2017
rs1056441	rs1056441	chr20:62370349	chr20:63738996	C/T	Body mass index variability	EFO_0004340	GIANT	22982992	European	2012	0.02	0.006	0.00069	+	127612	38	Z-score2	GIANT_BMI-Var_EUR_2012
rs1056441	rs1056441	chr20:62370349	chr20:63738996	C/T	Basal metabolic rate	EFO_0007777	Neale B	UKBB	European	2017	0.005811	0.001714	0.0006962	+	331307	1	IVNT	Neale-B_UKBB_EUR_2017
rs1056441	rs1056441	chr20:62370349	chr20:63738996	C/T	Impedance of leg left	-	Neale B	UKBB	European	2017	0.007949	0.002344	0.0006962	+	331296	1	IVNT	Neale-B_UKBB_EUR_2017
rs1056441	rs1056441	chr20:62370349	chr20:63738996	C/T	Other general symptoms and signs	EFO_0003765	Neale B	UKBB	European	2017	-0.0001337	3.94e-05	0.0006983	-	337199	1	risk diff	Neale-B_UKBB_EUR_2017
rs1056441	rs1056441	chr20:62370349	chr20:63738996	C/T	Other general symptoms and signs	EFO_0003765	Neale B	UKBB	European	2017	-0.0001338	3.95e-05	0.0006993	-	337199	1	risk diff	Neale-B_UKBB_EUR_2017
rs1056441	rs1056441	chr20:62370349	chr20:63738996	C/T	Diverticular disease of intestine	EFO_1001460	Neale B	UKBB	European	2017	-0.001241	0.0003661	0.0007007	-	337199	1	risk diff	Neale-B_UKBB_EUR_2017
rs1056441	rs1056441	chr20:62370349	chr20:63738996	C/T	Long-standing illness, disability or infirmity	-	Neale B	UKBB	European	2017	0.004136	0.001222	0.0007105	+	329663	1	risk diff	Neale-B_UKBB_EUR_2017
rs1056441	rs1056441	chr20:62370349	chr20:63738996	C/T	Basal metabolic rate	EFO_0007777	Neale B	UKBB	European	2017	0.005801	0.001714	0.0007122	+	331307	1	IVNT	Neale-B_UKBB_EUR_2017
rs1056441	rs1056441	chr20:62370349	chr20:63738996	C/T	Basal metabolic rate	EFO_0007777	Neale B	UKBB	European	2017	0.0058	0.001714	0.0007129	+	331307	1	IVNT	Neale-B_UKBB_EUR_2017
rs1056441	rs1056441	chr20:62370349	chr20:63738996	C/T	Other hearing loss	EFO_0004238	Neale B	UKBB	European	2017	0.0002446	7.23e-05	0.0007145	+	337199	1	risk diff	Neale-B_UKBB_EUR_2017
rs1056441	rs1056441	chr20:62370349	chr20:63738996	C/T	Basal metabolic rate	EFO_0007777	Neale B	UKBB	European	2017	0.005796	0.001714	0.0007205	+	331307	1	IVNT	Neale-B_UKBB_EUR_2017
rs1056441	rs1056441	chr20:62370349	chr20:63738996	C/T	Attention to artificial openings	EFO_0009786	Neale B	UKBB	European	2017	-0.0004565	0.000135	0.0007214	-	337199	1	risk diff	Neale-B_UKBB_EUR_2017
rs1056441	rs1056441	chr20:62370349	chr20:63738996	C/T	Impedance of leg left	-	Neale B	UKBB	European	2017	0.007926	0.002344	0.0007218	+	331296	1	IVNT	Neale-B_UKBB_EUR_2017
rs1056441	rs1056441	chr20:62370349	chr20:63738996	C/T	White blood cell count	EFO_0004586	Astle W	27863252	European	2016	0.0129	0.003816	0.0007243	+	173480	2	IVNT	Astle-W_Blood-Cell-Traits_EUR_2016
rs1056441	rs1056441	chr20:62370349	chr20:63738996	C/T	Basal metabolic rate	EFO_0007777	Neale B	UKBB	European	2017	0.005796	0.001715	0.0007252	+	331307	1	IVNT	Neale-B_UKBB_EUR_2017
rs1056441	rs1056441	chr20:62370349	chr20:63738996	C/T	Treatment with domperidone	EFO_0007056	Neale B	UKBB	European	2017	0.0003896	0.0001153	0.0007282	+	337159	1	risk diff	Neale-B_UKBB_EUR_2017
rs1056441	rs1056441	chr20:62370349	chr20:63738996	C/T	Other hearing loss	EFO_0004238	Neale B	UKBB	European	2017	0.0002439	7.23e-05	0.000744	+	337199	1	risk diff	Neale-B_UKBB_EUR_2017
rs1056441	rs1056441	chr20:62370349	chr20:63738996	C/T	Other specific joint derangements	-	Neale B	UKBB	European	2017	0.0004332	0.0001284	0.0007445	+	337199	1	risk diff	Neale-B_UKBB_EUR_2017
rs1056441	rs1056441	chr20:62370349	chr20:63738996	C/T	Total cholesterol	EFO_0004574	GLGC	24097068	European	2013	-0.0149	0.004	0.0007479	-	187365	60	IVNT	GLGC_TC_EUR_2013
rs1056441	rs1056441	chr20:62370349	chr20:63738996	C/T	Body mass index	EFO_0004340	Neale B	UKBB	European	2017	0.008575	0.002544	0.0007494	+	336107	1	IVNT	Neale-B_UKBB_EUR_2017
rs1056441	rs1056441	chr20:62370349	chr20:63738996	C/T	Body mass index variability	EFO_0004340	GIANT	22982992	European	2012	0.02	0.0061	0.00075	+	127612	38	Z-score2	GIANT_BMI-Var_EUR_2012
rs1056441	rs1056441	chr20:62370349	chr20:63738996	C/T	Low density lipoprotein	EFO_0004611	GLGC	24097068	European	2013	-0.0147	0.004	0.0007519	-	173082	60	IVNT	GLGC_LDL_EUR_2013
rs1056441	rs1056441	chr20:62370349	chr20:63738996	C/T	Body mass index variability	EFO_0004340	GIANT	22982992	European	2012	0.02	0.006	0.00076	+	127612	38	Z-score2	GIANT_BMI-Var_EUR_2012
rs1056441	rs1056441	chr20:62370349	chr20:63738996	C/T	Impedance of leg left	-	Neale B	UKBB	European	2017	0.007894	0.002345	0.0007602	+	331296	1	IVNT	Neale-B_UKBB_EUR_2017
rs1056441	rs1056441	chr20:62370349	chr20:63738996	C/T	Other hearing loss	EFO_0004238	Neale B	UKBB	European	2017	0.0002434	7.23e-05	0.0007612	+	337199	1	risk diff	Neale-B_UKBB_EUR_2017
rs1056441	rs1056441	chr20:62370349	chr20:63738996	C/T	Impedance of leg left	-	Neale B	UKBB	European	2017	0.007889	0.002344	0.0007634	+	331296	1	IVNT	Neale-B_UKBB_EUR_2017
rs1056441	rs1056441	chr20:62370349	chr20:63738996	C/T	Treatment with dexamethasone	EFO_0007056	Neale B	UKBB	European	2017	0.0001469	4.37e-05	0.0007664	+	337159	1	risk diff	Neale-B_UKBB_EUR_2017
rs1056441	rs1056441	chr20:62370349	chr20:63738996	C/T	Basal metabolic rate	EFO_0007777	Neale B	UKBB	European	2017	0.005766	0.001714	0.000767	+	331307	1	IVNT	Neale-B_UKBB_EUR_2017
rs1056441	rs1056441	chr20:62370349	chr20:63738996	C/T	Ulcerative colitis	EFO_0000729	Neale B	UKBB	European	2017	0.000596	0.0001772	0.0007691	+	337199	1	risk diff	Neale-B_UKBB_EUR_2017
rs1056441	rs1056441	chr20:62370349	chr20:63738996	C/T	Impedance of leg left	-	Neale B	UKBB	European	2017	0.007891	0.002348	0.0007773	+	331296	1	IVNT	Neale-B_UKBB_EUR_2017
rs1056441	rs1056441	chr20:62370349	chr20:63738996	C/T	Ulcerative colitis	EFO_0000729	Neale B	UKBB	European	2017	0.0005955	0.0001772	0.0007782	+	337199	1	risk diff	Neale-B_UKBB_EUR_2017
rs1056441	rs1056441	chr20:62370349	chr20:63738996	C/T	Body mass index variability	EFO_0004340	GIANT	22982992	European	2012	0.02	0.006	0.00078	+	127612	38	Z-score2	GIANT_BMI-Var_EUR_2012
rs1056441	rs1056441	chr20:62370349	chr20:63738996	C/T	White blood cell count	EFO_0004586	Astle W	27863252	European	2016	0.01282	0.003816	0.0007808	+	173480	2	IVNT	Astle-W_Blood-Cell-Traits_EUR_2016
rs1056441	rs1056441	chr20:62370349	chr20:63738996	C/T	Basal metabolic rate	EFO_0007777	Neale B	UKBB	European	2017	0.005754	0.001714	0.0007888	+	331307	1	IVNT	Neale-B_UKBB_EUR_2017
rs1056441	rs1056441	chr20:62370349	chr20:63738996	C/T	Red blood cell count	EFO_0004586	Astle W	27863252	European	2016	0.01263	0.003764	0.0007892	+	173480	2	IVNT	Astle-W_Blood-Cell-Traits_EUR_2016
rs1056441	rs1056441	chr20:62370349	chr20:63738996	C/T	Red blood cell count	EFO_0004586	Astle W	27863252	European	2016	0.01264	0.003767	0.0007932	+	173480	2	IVNT	Astle-W_Blood-Cell-Traits_EUR_2016
rs1056441	rs1056441	chr20:62370349	chr20:63738996	C/T	Diverticular disease of intestine	EFO_1001460	Neale B	UKBB	European	2017	-0.001231	0.0003668	0.0007952	-	337199	1	risk diff	Neale-B_UKBB_EUR_2017
rs1056441	rs1056441	chr20:62370349	chr20:63738996	C/T	Impedance of leg left	-	Neale B	UKBB	European	2017	0.007864	0.002345	0.0007959	+	331296	1	IVNT	Neale-B_UKBB_EUR_2017
rs1056441	rs1056441	chr20:62370349	chr20:63738996	C/T	Pain type experienced in last month: none of the above	EFO_0003843	Neale B	UKBB	European	2017	-0.004269	0.001275	0.0008116	-	336650	1	risk diff	Neale-B_UKBB_EUR_2017
rs1056441	rs1056441	chr20:62370349	chr20:63738996	C/T	Basal metabolic rate	EFO_0007777	Neale B	UKBB	European	2017	0.005738	0.001714	0.0008133	+	331307	1	IVNT	Neale-B_UKBB_EUR_2017
rs1056441	rs1056441	chr20:62370349	chr20:63738996	C/T	Red blood cell count	EFO_0004586	Astle W	27863252	European	2016	0.01269	0.003798	0.0008364	+	173480	2	IVNT	Astle-W_Blood-Cell-Traits_EUR_2016
rs1056441	rs1056441	chr20:62370349	chr20:63738996	C/T	Diverticular disease of intestine	EFO_1001460	Neale B	UKBB	European	2017	-0.001224	0.0003664	0.0008365	-	337199	1	risk diff	Neale-B_UKBB_EUR_2017
rs1056441	rs1056441	chr20:62370349	chr20:63738996	C/T	Arm predicted mass right	-	Neale B	UKBB	European	2017	0.005364	0.001606	0.0008395	+	331216	1	IVNT	Neale-B_UKBB_EUR_2017
rs1056441	rs1056441	chr20:62370349	chr20:63738996	C/T	Treatment with domperidone	EFO_0007056	Neale B	UKBB	European	2017	0.0003853	0.0001154	0.0008435	+	337159	1	risk diff	Neale-B_UKBB_EUR_2017
rs1056441	rs1056441	chr20:62370349	chr20:63738996	C/T	Other specific joint derangements	-	Neale B	UKBB	European	2017	0.0004295	0.0001287	0.0008439	+	337199	1	risk diff	Neale-B_UKBB_EUR_2017
rs1056441	rs1056441	chr20:62370349	chr20:63738996	C/T	White blood cell count	EFO_0004586	Astle W	27863252	European	2016	0.01268	0.003799	0.0008456	+	173480	2	IVNT	Astle-W_Blood-Cell-Traits_EUR_2016
rs1056441	rs1056441	chr20:62370349	chr20:63738996	C/T	Pain type experienced in last month: none of the above	EFO_0003843	Neale B	UKBB	European	2017	-0.004246	0.001274	0.0008564	-	336650	1	risk diff	Neale-B_UKBB_EUR_2017
rs1056441	rs1056441	chr20:62370349	chr20:63738996	C/T	Low density lipoprotein	EFO_0004611	GLGC	24097068	European	2013	-0.0145	0.0041	0.0008572	-	173082	60	IVNT	GLGC_LDL_EUR_2013
rs1056441	rs1056441	chr20:62370349	chr20:63738996	C/T	Arm fat-free mass left	-	Neale B	UKBB	European	2017	0.005445	0.001635	0.0008673	+	331159	1	IVNT	Neale-B_UKBB_EUR_2017
rs1056441	rs1056441	chr20:62370349	chr20:63738996	C/T	Long-standing illness, disability or infirmity	-	Neale B	UKBB	European	2017	0.004059	0.001219	0.0008697	+	329663	1	risk diff	Neale-B_UKBB_EUR_2017
rs1056441	rs1056441	chr20:62370349	chr20:63738996	C/T	Monocyte count	EFO_0004586	Astle W	27863252	European	2016	0.01265	0.003803	0.0008781	+	173480	2	IVNT	Astle-W_Blood-Cell-Traits_EUR_2016
rs1056441	rs1056441	chr20:62370349	chr20:63738996	C/T	Arm predicted mass left	-	Neale B	UKBB	European	2017	0.005418	0.001629	0.0008785	+	331146	1	IVNT	Neale-B_UKBB_EUR_2017
rs1056441	rs1056441	chr20:62370349	chr20:63738996	C/T	Arm predicted mass right	-	Neale B	UKBB	European	2017	0.005343	0.001606	0.0008793	+	331216	1	IVNT	Neale-B_UKBB_EUR_2017
rs1056441	rs1056441	chr20:62370349	chr20:63738996	C/T	Pain type experienced in last month: none of the above	EFO_0003843	Neale B	UKBB	European	2017	-0.004244	0.001276	0.0008812	-	336650	1	risk diff	Neale-B_UKBB_EUR_2017
rs1056441	rs1056441	chr20:62370349	chr20:63738996	C/T	Pain type experienced in last month: none of the above	EFO_0003843	Neale B	UKBB	European	2017	-0.004238	0.001274	0.0008846	-	336650	1	risk diff	Neale-B_UKBB_EUR_2017
rs1056441	rs1056441	chr20:62370349	chr20:63738996	C/T	Other hearing loss	EFO_0004238	Neale B	UKBB	European	2017	0.0002418	7.28e-05	0.0008889	+	337199	1	risk diff	Neale-B_UKBB_EUR_2017
rs1056441	rs1056441	chr20:62370349	chr20:63738996	C/T	Height	EFO_0004339	GIANT	28146470	European	2017	0.0091	0.0028	0.00089	+	381625	106	IVNT	GIANT_Height_EUR_2017
rs1056441	rs1056441	chr20:62370349	chr20:63738996	C/T	Arm fat-free mass left	-	Neale B	UKBB	European	2017	0.005424	0.001634	0.0009052	+	331159	1	IVNT	Neale-B_UKBB_EUR_2017
rs1056441	rs1056441	chr20:62370349	chr20:63738996	C/T	Pain type experienced in last month: none of the above	EFO_0003843	Neale B	UKBB	European	2017	-0.004227	0.001274	0.0009057	-	336650	1	risk diff	Neale-B_UKBB_EUR_2017
rs1056441	rs1056441	chr20:62370349	chr20:63738996	C/T	Arm fat-free mass left	-	Neale B	UKBB	European	2017	0.005425	0.001635	0.0009065	+	331159	1	IVNT	Neale-B_UKBB_EUR_2017
rs1056441	rs1056441	chr20:62370349	chr20:63738996	C/T	Eosinophil count	EFO_0004586	Astle W	27863252	European	2016	0.01252	0.003777	0.0009146	+	173480	2	IVNT	Astle-W_Blood-Cell-Traits_EUR_2016
rs1056441	rs1056441	chr20:62370349	chr20:63738996	C/T	Lumber spine bone mineral density	EFO_0007701	GEFOS	26367794	European	2015	0.03237	0.009567	0.000916	+	28498	12	Z-score	GEFOS_LSBMD_EUR_2015
rs1056441	rs1056441	chr20:62370349	chr20:63738996	C/T	Arm predicted mass left	-	Neale B	UKBB	European	2017	0.005397	0.001628	0.0009186	+	331146	1	IVNT	Neale-B_UKBB_EUR_2017
rs1056441	rs1056441	chr20:62370349	chr20:63738996	C/T	Lumber spine bone mineral density	EFO_0007701	GEFOS	26367794	European	2015	0.032	0.009427	0.000919	+	28498	12	Z-score	GEFOS_LSBMD_EUR_2015
rs1056441	rs1056441	chr20:62370349	chr20:63738996	C/T	Poisoning by nonopioid analgesics, antipyretics and antirheumatics	EFO_0008546	Neale B	UKBB	European	2017	0.0004313	0.0001302	0.0009216	+	337199	1	risk diff	Neale-B_UKBB_EUR_2017
rs1056441	rs1056441	chr20:62370349	chr20:63738996	C/T	Arm fat-free mass left	-	Neale B	UKBB	European	2017	0.005416	0.001635	0.000922	+	331159	1	IVNT	Neale-B_UKBB_EUR_2017
rs1056441	rs1056441	chr20:62370349	chr20:63738996	C/T	Basal metabolic rate	EFO_0007777	Neale B	UKBB	European	2017	0.005678	0.001714	0.0009245	+	331307	1	IVNT	Neale-B_UKBB_EUR_2017
rs1056441	rs1056441	chr20:62370349	chr20:63738996	C/T	Poisoning by nonopioid analgesics, antipyretics and antirheumatics	EFO_0008546	Neale B	UKBB	European	2017	0.0004311	0.0001302	0.0009284	+	337199	1	risk diff	Neale-B_UKBB_EUR_2017
rs1056441	rs1056441	chr20:62370349	chr20:63738996	C/T	Arm predicted mass left	-	Neale B	UKBB	European	2017	0.005393	0.001629	0.00093	+	331146	1	IVNT	Neale-B_UKBB_EUR_2017
rs1056441	rs1056441	chr20:62370349	chr20:63738996	C/T	Alzheimers disease	-	Li H	17998437	European	2008	NA	NA	0.00093	NA	1489	-	-	GRASP
rs1056441	rs1056441	chr20:62370349	chr20:63738996	C/T	Diverticular disease of intestine	EFO_1001460	Neale B	UKBB	European	2017	-0.001212	0.0003662	0.0009303	-	337199	1	risk diff	Neale-B_UKBB_EUR_2017
rs1056441	rs1056441	chr20:62370349	chr20:63738996	C/T	Poisoning by nonopioid analgesics, antipyretics and antirheumatics	EFO_0008546	Neale B	UKBB	European	2017	0.000431	0.0001302	0.0009306	+	337199	1	risk diff	Neale-B_UKBB_EUR_2017
rs1056441	rs1056441	chr20:62370349	chr20:63738996	C/T	Arm predicted mass right	-	Neale B	UKBB	European	2017	0.005313	0.001605	0.0009309	+	331216	1	IVNT	Neale-B_UKBB_EUR_2017
rs1056441	rs1056441	chr20:62370349	chr20:63738996	C/T	Arm predicted mass right	-	Neale B	UKBB	European	2017	0.005311	0.001605	0.0009336	+	331216	1	IVNT	Neale-B_UKBB_EUR_2017
rs1056441	rs1056441	chr20:62370349	chr20:63738996	C/T	Arm predicted mass right	-	Neale B	UKBB	European	2017	0.005311	0.001605	0.0009352	+	331216	1	IVNT	Neale-B_UKBB_EUR_2017
rs1056441	rs1056441	chr20:62370349	chr20:63738996	C/T	Pain type experienced in last month: none of the above	EFO_0003843	Neale B	UKBB	European	2017	-0.004213	0.001273	0.0009389	-	336650	1	risk diff	Neale-B_UKBB_EUR_2017
rs1056441	rs1056441	chr20:62370349	chr20:63738996	C/T	Arm predicted mass left	-	Neale B	UKBB	European	2017	0.005385	0.001628	0.0009434	+	331146	1	IVNT	Neale-B_UKBB_EUR_2017
rs1056441	rs1056441	chr20:62370349	chr20:63738996	C/T	White blood cell count	EFO_0004586	Astle W	27863252	European	2016	0.01262	0.00382	0.0009509	+	173480	2	IVNT	Astle-W_Blood-Cell-Traits_EUR_2016
rs1056441	rs1056441	chr20:62370349	chr20:63738996	C/T	Arm predicted mass right	-	Neale B	UKBB	European	2017	0.005303	0.001605	0.000952	+	331216	1	IVNT	Neale-B_UKBB_EUR_2017
rs1056441	rs1056441	chr20:62370349	chr20:63738996	C/T	Other hearing loss	EFO_0004238	Neale B	UKBB	European	2017	0.0002403	7.27e-05	0.0009521	+	337199	1	risk diff	Neale-B_UKBB_EUR_2017
rs1056441	rs1056441	chr20:62370349	chr20:63738996	C/T	Pain type experienced in last month: none of the above	EFO_0003843	Neale B	UKBB	European	2017	-0.004203	0.001273	0.0009665	-	336650	1	risk diff	Neale-B_UKBB_EUR_2017
rs1056441	rs1056441	chr20:62370349	chr20:63738996	C/T	Monocyte count	EFO_0004586	Astle W	27863252	European	2016	0.01253	0.003802	0.0009787	+	173480	2	IVNT	Astle-W_Blood-Cell-Traits_EUR_2016
rs1056441	rs1056441	chr20:62370349	chr20:63738996	C/T	Diverticular disease of intestine	EFO_1001460	Neale B	UKBB	European	2017	-0.001208	0.0003665	0.0009827	-	337199	1	risk diff	Neale-B_UKBB_EUR_2017
rs1056441	rs1056441	chr20:62370349	chr20:63738996	C/T	Arm predicted mass right	-	Neale B	UKBB	European	2017	0.005289	0.001606	0.0009882	+	331216	1	IVNT	Neale-B_UKBB_EUR_2017
rs1056441	rs1056441	chr20:62370349	chr20:63738996	C/T	Body mass index variability	EFO_0004340	GIANT	22982992	European	2012	0.02	0.0061	0.001	+	127612	38	Z-score2	GIANT_BMI-Var_EUR_2012
rs1056441	rs1056441	chr20:62370349	chr20:63738996	C/T	Lumber spine bone mineral density	EFO_0007701	GEFOS	26367794	European	2015	0.03179	0.009432	0.001002	+	28498	12	Z-score	GEFOS_LSBMD_EUR_2015
rs1056441	rs1056441	chr20:62370349	chr20:63738996	C/T	Arm predicted mass right	-	Neale B	UKBB	European	2017	0.005279	0.001605	0.001004	+	331216	1	IVNT	Neale-B_UKBB_EUR_2017
rs1056441	rs1056441	chr20:62370349	chr20:63738996	C/T	Poisoning by nonopioid analgesics, antipyretics and antirheumatics	EFO_0008546	Neale B	UKBB	European	2017	0.0004283	0.0001302	0.001004	+	337199	1	risk diff	Neale-B_UKBB_EUR_2017
rs1056441	rs1056441	chr20:62370349	chr20:63738996	C/T	Pain type experienced in last month: none of the above	EFO_0003843	Neale B	UKBB	European	2017	-0.004191	0.001274	0.001006	-	336650	1	risk diff	Neale-B_UKBB_EUR_2017
rs1056441	rs1056441	chr20:62370349	chr20:63738996	C/T	Diverticular disease of intestine	EFO_1001460	Neale B	UKBB	European	2017	-0.001204	0.0003661	0.001008	-	337199	1	risk diff	Neale-B_UKBB_EUR_2017
rs1056441	rs1056441	chr20:62370349	chr20:63738996	C/T	Monocyte count	EFO_0004586	Astle W	27863252	European	2016	0.0125	0.003801	0.001012	+	173480	2	IVNT	Astle-W_Blood-Cell-Traits_EUR_2016
rs1056441	rs1056441	chr20:62370349	chr20:63738996	C/T	Arm predicted mass right	-	Neale B	UKBB	European	2017	0.005268	0.001605	0.001029	+	331216	1	IVNT	Neale-B_UKBB_EUR_2017
rs1056441	rs1056441	chr20:62370349	chr20:63738996	C/T	Red blood cell count	EFO_0004586	Astle W	27863252	European	2016	0.01235	0.003762	0.001032	+	173480	2	IVNT	Astle-W_Blood-Cell-Traits_EUR_2016
rs1056441	rs1056441	chr20:62370349	chr20:63738996	C/T	Pain type experienced in last month: none of the above	EFO_0003843	Neale B	UKBB	European	2017	-0.004177	0.001274	0.001038	-	336650	1	risk diff	Neale-B_UKBB_EUR_2017
rs1056441	rs1056441	chr20:62370349	chr20:63738996	C/T	Arm fat-free mass left	-	Neale B	UKBB	European	2017	0.005367	0.001637	0.001045	+	331159	1	IVNT	Neale-B_UKBB_EUR_2017
rs1056441	rs1056441	chr20:62370349	chr20:63738996	C/T	Poisoning by nonopioid analgesics, antipyretics and antirheumatics	EFO_0008546	Neale B	UKBB	European	2017	0.0004268	0.0001302	0.001047	+	337199	1	risk diff	Neale-B_UKBB_EUR_2017
rs1056441	rs1056441	chr20:62370349	chr20:63738996	C/T	Monocyte count	EFO_0004586	Astle W	27863252	European	2016	0.01251	0.003816	0.001048	+	173480	2	IVNT	Astle-W_Blood-Cell-Traits_EUR_2016
rs1056441	rs1056441	chr20:62370349	chr20:63738996	C/T	Poisoning by nonopioid analgesics, antipyretics and antirheumatics	EFO_0008546	Neale B	UKBB	European	2017	0.0004273	0.0001304	0.001049	+	337199	1	risk diff	Neale-B_UKBB_EUR_2017
rs1056441	rs1056441	chr20:62370349	chr20:63738996	C/T	Pain type experienced in last month: none of the above	EFO_0003843	Neale B	UKBB	European	2017	-0.004173	0.001274	0.00105	-	336650	1	risk diff	Neale-B_UKBB_EUR_2017
rs1056441	rs1056441	chr20:62370349	chr20:63738996	C/T	Monocyte count	EFO_0004586	Astle W	27863252	European	2016	0.01246	0.003802	0.00105	+	173480	2	IVNT	Astle-W_Blood-Cell-Traits_EUR_2016
rs1056441	rs1056441	chr20:62370349	chr20:63738996	C/T	Arm fat-free mass left	-	Neale B	UKBB	European	2017	0.005355	0.001634	0.001052	+	331159	1	IVNT	Neale-B_UKBB_EUR_2017
rs1056441	rs1056441	chr20:62370349	chr20:63738996	C/T	Pain type experienced in last month: none of the above	EFO_0003843	Neale B	UKBB	European	2017	-0.004171	0.001273	0.001055	-	336650	1	risk diff	Neale-B_UKBB_EUR_2017
rs1056441	rs1056441	chr20:62370349	chr20:63738996	C/T	Arm predicted mass right	-	Neale B	UKBB	European	2017	0.00525	0.001605	0.001071	+	331216	1	IVNT	Neale-B_UKBB_EUR_2017
rs1056441	rs1056441	chr20:62370349	chr20:63738996	C/T	Other hearing loss	EFO_0004238	Neale B	UKBB	European	2017	0.0002377	7.27e-05	0.001074	+	337199	1	risk diff	Neale-B_UKBB_EUR_2017
rs1056441	rs1056441	chr20:62370349	chr20:63738996	C/T	Pain type experienced in last month: none of the above	EFO_0003843	Neale B	UKBB	European	2017	-0.004163	0.001274	0.00108	-	336650	1	risk diff	Neale-B_UKBB_EUR_2017
rs1056441	rs1056441	chr20:62370349	chr20:63738996	C/T	Ulcerative colitis	EFO_0000729	IBDGC	26192919	European	2015	0.0807	0.0247	0.00108	+	27432	8	log OR	IBDGC_Ulcerative-Colitis_EUR_2015
rs1056441	rs1056441	chr20:62370349	chr20:63738996	C/T	Arm predicted mass right	-	Neale B	UKBB	European	2017	0.005255	0.001608	0.001081	+	331216	1	IVNT	Neale-B_UKBB_EUR_2017
rs1056441	rs1056441	chr20:62370349	chr20:63738996	C/T	Other hearing loss	EFO_0004238	Neale B	UKBB	European	2017	0.0002374	7.27e-05	0.001089	+	337199	1	risk diff	Neale-B_UKBB_EUR_2017
rs1056441	rs1056441	chr20:62370349	chr20:63738996	C/T	Arm predicted mass left	-	Neale B	UKBB	European	2017	0.005317	0.001628	0.001093	+	331146	1	IVNT	Neale-B_UKBB_EUR_2017
rs1056441	rs1056441	chr20:62370349	chr20:63738996	C/T	Diverticular disease of intestine	EFO_1001460	Neale B	UKBB	European	2017	-0.001196	0.0003662	0.001096	-	337199	1	risk diff	Neale-B_UKBB_EUR_2017
rs1056441	rs1056441	chr20:62370349	chr20:63738996	C/T	Arm predicted mass left	-	Neale B	UKBB	European	2017	0.005324	0.001631	0.001099	+	331146	1	IVNT	Neale-B_UKBB_EUR_2017
rs1056441	rs1056441	chr20:62370349	chr20:63738996	C/T	Body mass index variability	EFO_0004340	GIANT	22982992	European	2012	0.02	0.0061	0.0011	+	127612	38	Z-score2	GIANT_BMI-Var_EUR_2012
rs1056441	rs1056441	chr20:62370349	chr20:63738996	C/T	Lumber spine bone mineral density	EFO_0007701	GEFOS	26367794	European	2015	0.03146	0.009421	0.001114	+	28498	12	Z-score	GEFOS_LSBMD_EUR_2015
rs1056441	rs1056441	chr20:62370349	chr20:63738996	C/T	Sum eosinophil basophil counts	EFO_0004586	Astle W	27863252	European	2016	0.01232	0.00378	0.001114	+	173480	2	IVNT	Astle-W_Blood-Cell-Traits_EUR_2016
rs1056441	rs1056441	chr20:62370349	chr20:63738996	C/T	Self-reported prostate cancer	EFO_0001663	Neale B	UKBB	European	2017	0.0007477	0.0002294	0.001115	+	337159	1	risk diff	Neale-B_UKBB_EUR_2017
rs1056441	rs1056441	chr20:62370349	chr20:63738996	C/T	Lumber spine bone mineral density	EFO_0007701	GEFOS	26367794	European	2015	0.03207	0.009643	0.001119	+	28498	12	Z-score	GEFOS_LSBMD_EUR_2015
rs1056441	rs1056441	chr20:62370349	chr20:63738996	C/T	Pain type experienced in last month: none of the above	EFO_0003843	Neale B	UKBB	European	2017	-0.004122	0.001266	0.001129	-	336650	1	risk diff	Neale-B_UKBB_EUR_2017
rs1056441	rs1056441	chr20:62370349	chr20:63738996	C/T	White blood cell count	EFO_0004586	Astle W	27863252	European	2016	0.01244	0.003827	0.001149	+	173480	2	IVNT	Astle-W_Blood-Cell-Traits_EUR_2016
rs1056441	rs1056441	chr20:62370349	chr20:63738996	C/T	Other hearing loss	EFO_0004238	Neale B	UKBB	European	2017	0.0002367	7.28e-05	0.001152	+	337199	1	risk diff	Neale-B_UKBB_EUR_2017
rs1056441	rs1056441	chr20:62370349	chr20:63738996	C/T	Impedance of leg right	-	Neale B	UKBB	European	2017	0.007878	0.002423	0.001152	+	331301	1	IVNT	Neale-B_UKBB_EUR_2017
rs1056441	rs1056441	chr20:62370349	chr20:63738996	C/T	Chronic ischaemic heart disease	EFO_0001645	Neale B	UKBB	European	2017	-0.001381	0.0004249	0.001154	-	337199	1	risk diff	Neale-B_UKBB_EUR_2017
rs1056441	rs1056441	chr20:62370349	chr20:63738996	C/T	Other specific joint derangements	-	Neale B	UKBB	European	2017	0.0004349	0.0001338	0.001154	+	337199	1	risk diff	Neale-B_UKBB_EUR_2017
rs1056441	rs1056441	chr20:62370349	chr20:63738996	C/T	Lumber spine bone mineral density	EFO_0007701	GEFOS	26367794	European	2015	0.03142	0.009443	0.001164	+	28498	12	Z-score	GEFOS_LSBMD_EUR_2015
rs1056441	rs1056441	chr20:62370349	chr20:63738996	C/T	Diverticular disease of intestine	EFO_1001460	Neale B	UKBB	European	2017	-0.001188	0.0003662	0.001175	-	337199	1	risk diff	Neale-B_UKBB_EUR_2017
rs1056441	rs1056441	chr20:62370349	chr20:63738996	C/T	Diverticular disease of intestine	EFO_1001460	Neale B	UKBB	European	2017	-0.001188	0.0003662	0.001177	-	337199	1	risk diff	Neale-B_UKBB_EUR_2017
rs1056441	rs1056441	chr20:62370349	chr20:63738996	C/T	Arm predicted mass right	-	Neale B	UKBB	European	2017	0.005206	0.001605	0.001179	+	331216	1	IVNT	Neale-B_UKBB_EUR_2017
rs1056441	rs1056441	chr20:62370349	chr20:63738996	C/T	Arm fat-free mass right	-	Neale B	UKBB	European	2017	0.005226	0.001612	0.001187	+	331221	1	IVNT	Neale-B_UKBB_EUR_2017
rs1056441	rs1056441	chr20:62370349	chr20:63738996	C/T	Diverticular disease of intestine	EFO_1001460	Neale B	UKBB	European	2017	-0.001187	0.0003662	0.001193	-	337199	1	risk diff	Neale-B_UKBB_EUR_2017
rs1056441	rs1056441	chr20:62370349	chr20:63738996	C/T	Illnesses of father: chronic bronchitis or emphysema	EFO_0006505;EFO_0000464	Neale B	UKBB	European	2017	0.002788	0.0008608	0.001202	+	294680	1	risk diff	Neale-B_UKBB_EUR_2017
rs1056441	rs1056441	chr20:62370349	chr20:63738996	C/T	Lumber spine bone mineral density	EFO_0007701	GEFOS	26367794	European	2015	0.03127	0.009429	0.001205	+	28498	12	Z-score	GEFOS_LSBMD_EUR_2015
rs1056441	rs1056441	chr20:62370349	chr20:63738996	C/T	Red blood cell count	EFO_0004586	Astle W	27863252	European	2016	0.01228	0.003795	0.001219	+	173480	2	IVNT	Astle-W_Blood-Cell-Traits_EUR_2016
rs1056441	rs1056441	chr20:62370349	chr20:63738996	C/T	Monocyte count	EFO_0004586	Astle W	27863252	European	2016	0.0123	0.003802	0.001222	+	173480	2	IVNT	Astle-W_Blood-Cell-Traits_EUR_2016
rs1056441	rs1056441	chr20:62370349	chr20:63738996	C/T	Leiomyoma of uterus	EFO_0000731	Neale B	UKBB	European	2017	-0.000975	0.0003016	0.001226	-	337199	1	risk diff	Neale-B_UKBB_EUR_2017
rs1056441	rs1056441	chr20:62370349	chr20:63738996	C/T	Diverticular disease of intestine	EFO_1001460	Neale B	UKBB	European	2017	-0.001183	0.0003661	0.001235	-	337199	1	risk diff	Neale-B_UKBB_EUR_2017
rs1056441	rs1056441	chr20:62370349	chr20:63738996	C/T	Pain type experienced in last month: none of the above	EFO_0003843	Neale B	UKBB	European	2017	-0.004089	0.001267	0.001244	-	336650	1	risk diff	Neale-B_UKBB_EUR_2017
rs1056441	rs1056441	chr20:62370349	chr20:63738996	C/T	White blood cell count	EFO_0004586	Astle W	27863252	European	2016	0.01234	0.003825	0.001249	+	173480	2	IVNT	Astle-W_Blood-Cell-Traits_EUR_2016
rs1056441	rs1056441	chr20:62370349	chr20:63738996	C/T	Other specific joint derangements	-	Neale B	UKBB	European	2017	0.0004145	0.0001285	0.001255	+	337199	1	risk diff	Neale-B_UKBB_EUR_2017
rs1056441	rs1056441	chr20:62370349	chr20:63738996	C/T	Other general symptoms and signs	EFO_0003765	Neale B	UKBB	European	2017	-0.0001267	3.93e-05	0.001269	-	337199	1	risk diff	Neale-B_UKBB_EUR_2017
rs1056441	rs1056441	chr20:62370349	chr20:63738996	C/T	Pain type experienced in last month: none of the above	EFO_0003843	Neale B	UKBB	European	2017	-0.004082	0.001267	0.001275	-	336650	1	risk diff	Neale-B_UKBB_EUR_2017
rs1056441	rs1056441	chr20:62370349	chr20:63738996	C/T	Red blood cell count	EFO_0004586	Astle W	27863252	European	2016	0.01214	0.00377	0.001277	+	173480	2	IVNT	Astle-W_Blood-Cell-Traits_EUR_2016
rs1056441	rs1056441	chr20:62370349	chr20:63738996	C/T	Arm fat-free mass right	-	Neale B	UKBB	European	2017	0.005191	0.001612	0.00128	+	331221	1	IVNT	Neale-B_UKBB_EUR_2017
rs1056441	rs1056441	chr20:62370349	chr20:63738996	C/T	Other general symptoms and signs	EFO_0003765	Neale B	UKBB	European	2017	-0.0001263	3.92e-05	0.001294	-	337199	1	risk diff	Neale-B_UKBB_EUR_2017
rs1056441	rs1056441	chr20:62370349	chr20:63738996	C/T	Diverticular disease of intestine	EFO_1001460	Neale B	UKBB	European	2017	-0.001179	0.0003664	0.001295	-	337199	1	risk diff	Neale-B_UKBB_EUR_2017
rs1056441	rs1056441	chr20:62370349	chr20:63738996	C/T	Other general symptoms and signs	EFO_0003765	Neale B	UKBB	European	2017	-0.0001261	3.92e-05	0.001309	-	337199	1	risk diff	Neale-B_UKBB_EUR_2017
rs1056441	rs1056441	chr20:62370349	chr20:63738996	C/T	White blood cell count	EFO_0004586	Astle W	27863252	European	2016	0.01271	0.003953	0.001309	+	173480	2	IVNT	Astle-W_Blood-Cell-Traits_EUR_2016
rs1056441	rs1056441	chr20:62370349	chr20:63738996	C/T	Monocyte count	EFO_0004586	Astle W	27863252	European	2016	0.01222	0.003802	0.001313	+	173480	2	IVNT	Astle-W_Blood-Cell-Traits_EUR_2016
rs1056441	rs1056441	chr20:62370349	chr20:63738996	C/T	Lumber spine bone mineral density	EFO_0007701	GEFOS	26367794	European	2015	0.03085	0.009379	0.001325	+	28498	12	Z-score	GEFOS_LSBMD_EUR_2015
rs1056441	rs1056441	chr20:62370349	chr20:63738996	C/T	Illnesses of father: chronic bronchitis or emphysema	EFO_0006505;EFO_0000464	Neale B	UKBB	European	2017	0.002763	0.0008608	0.001327	+	294680	1	risk diff	Neale-B_UKBB_EUR_2017
rs1056441	rs1056441	chr20:62370349	chr20:63738996	C/T	Treatment with omeprazole	EFO_0007056	Neale B	UKBB	European	2017	0.001951	0.0006082	0.001335	+	337159	1	risk diff	Neale-B_UKBB_EUR_2017
rs1056441	rs1056441	chr20:62370349	chr20:63738996	C/T	Impedance of leg left	-	Neale B	UKBB	European	2017	0.007562	0.002358	0.001341	+	331296	1	IVNT	Neale-B_UKBB_EUR_2017
rs1056441	rs1056441	chr20:62370349	chr20:63738996	C/T	Other general symptoms and signs	EFO_0003765	Neale B	UKBB	European	2017	-0.0001258	3.92e-05	0.001342	-	337199	1	risk diff	Neale-B_UKBB_EUR_2017
rs1056441	rs1056441	chr20:62370349	chr20:63738996	C/T	Other general symptoms and signs	EFO_0003765	Neale B	UKBB	European	2017	-0.0001258	3.92e-05	0.001342	-	337199	1	risk diff	Neale-B_UKBB_EUR_2017
rs1056441	rs1056441	chr20:62370349	chr20:63738996	C/T	Monocyte count	EFO_0004586	Astle W	27863252	European	2016	0.01219	0.003803	0.001344	+	173480	2	IVNT	Astle-W_Blood-Cell-Traits_EUR_2016
rs1056441	rs1056441	chr20:62370349	chr20:63738996	C/T	Illnesses of father: chronic bronchitis or emphysema	EFO_0006505;EFO_0000464	Neale B	UKBB	European	2017	0.002759	0.0008606	0.001349	+	294680	1	risk diff	Neale-B_UKBB_EUR_2017
rs1056441	rs1056441	chr20:62370349	chr20:63738996	C/T	Other general symptoms and signs	EFO_0003765	Neale B	UKBB	European	2017	-0.0001257	3.92e-05	0.001349	-	337199	1	risk diff	Neale-B_UKBB_EUR_2017
rs1056441	rs1056441	chr20:62370349	chr20:63738996	C/T	Red blood cell count	EFO_0004586	Astle W	27863252	European	2016	0.01213	0.003787	0.001357	+	173480	2	IVNT	Astle-W_Blood-Cell-Traits_EUR_2016
rs1056441	rs1056441	chr20:62370349	chr20:63738996	C/T	Diverticular disease of intestine	EFO_1001460	Neale B	UKBB	European	2017	-0.001169	0.0003648	0.001358	-	337199	1	risk diff	Neale-B_UKBB_EUR_2017
rs1056441	rs1056441	chr20:62370349	chr20:63738996	C/T	Pain type experienced in last month: none of the above	EFO_0003843	Neale B	UKBB	European	2017	-0.004057	0.001267	0.00136	-	336650	1	risk diff	Neale-B_UKBB_EUR_2017
rs1056441	rs1056441	chr20:62370349	chr20:63738996	C/T	Systolic blood pressure	EFO_0006335	Neale B	UKBB	European	2017	0.008345	0.002606	0.001362	+	317754	1	IVNT	Neale-B_UKBB_EUR_2017
rs1056441	rs1056441	chr20:62370349	chr20:63738996	C/T	Other specific joint derangements	-	Neale B	UKBB	European	2017	0.000411	0.0001284	0.001368	+	337199	1	risk diff	Neale-B_UKBB_EUR_2017
rs1056441	rs1056441	chr20:62370349	chr20:63738996	C/T	Arm fat-free mass right	-	Neale B	UKBB	European	2017	0.005156	0.001611	0.001369	+	331221	1	IVNT	Neale-B_UKBB_EUR_2017
rs1056441	rs1056441	chr20:62370349	chr20:63738996	C/T	Arm fat-free mass right	-	Neale B	UKBB	European	2017	0.005155	0.001611	0.00137	+	331221	1	IVNT	Neale-B_UKBB_EUR_2017
rs1056441	rs1056441	chr20:62370349	chr20:63738996	C/T	Arm fat-free mass right	-	Neale B	UKBB	European	2017	0.005154	0.00161	0.001372	+	331221	1	IVNT	Neale-B_UKBB_EUR_2017
rs1056441	rs1056441	chr20:62370349	chr20:63738996	C/T	Red blood cell count	EFO_0004586	Astle W	27863252	European	2016	0.01212	0.003787	0.001373	+	173480	2	IVNT	Astle-W_Blood-Cell-Traits_EUR_2016
rs1056441	rs1056441	chr20:62370349	chr20:63738996	C/T	Monocyte count	EFO_0004586	Astle W	27863252	European	2016	0.01218	0.003807	0.001379	+	173480	2	IVNT	Astle-W_Blood-Cell-Traits_EUR_2016
rs1056441	rs1056441	chr20:62370349	chr20:63738996	C/T	Illnesses of father: chronic bronchitis or emphysema	EFO_0006505;EFO_0000464	Neale B	UKBB	European	2017	0.002756	0.0008615	0.001379	+	294680	1	risk diff	Neale-B_UKBB_EUR_2017
rs1056441	rs1056441	chr20:62370349	chr20:63738996	C/T	Arm fat-free mass right	-	Neale B	UKBB	European	2017	0.005148	0.001611	0.00139	+	331221	1	IVNT	Neale-B_UKBB_EUR_2017
rs1056441	rs1056441	chr20:62370349	chr20:63738996	C/T	Red blood cell count	EFO_0004586	Astle W	27863252	European	2016	0.01212	0.003791	0.001391	+	173480	2	IVNT	Astle-W_Blood-Cell-Traits_EUR_2016
rs1056441	rs1056441	chr20:62370349	chr20:63738996	C/T	Impedance of leg left	-	Neale B	UKBB	European	2017	0.007532	0.002357	0.001394	+	331296	1	IVNT	Neale-B_UKBB_EUR_2017
rs1056441	rs1056441	chr20:62370349	chr20:63738996	C/T	Pain type experienced in last month: none of the above	EFO_0003843	Neale B	UKBB	European	2017	-0.004048	0.001267	0.001394	-	336650	1	risk diff	Neale-B_UKBB_EUR_2017
rs1056441	rs1056441	chr20:62370349	chr20:63738996	C/T	Illnesses of father: chronic bronchitis or emphysema	EFO_0006505;EFO_0000464	Neale B	UKBB	European	2017	0.002749	0.0008606	0.001404	+	294680	1	risk diff	Neale-B_UKBB_EUR_2017
rs1056441	rs1056441	chr20:62370349	chr20:63738996	C/T	Impedance of leg left	-	Neale B	UKBB	European	2017	0.007524	0.002357	0.001409	+	331296	1	IVNT	Neale-B_UKBB_EUR_2017
rs1056441	rs1056441	chr20:62370349	chr20:63738996	C/T	Arm fat-free mass right	-	Neale B	UKBB	European	2017	0.005145	0.001611	0.00141	+	331221	1	IVNT	Neale-B_UKBB_EUR_2017
rs1056441	rs1056441	chr20:62370349	chr20:63738996	C/T	Treatment with omeprazole	EFO_0007056	Neale B	UKBB	European	2017	0.001941	0.0006081	0.001413	+	337159	1	risk diff	Neale-B_UKBB_EUR_2017
rs1056441	rs1056441	chr20:62370349	chr20:63738996	C/T	Red blood cell count	EFO_0004586	Astle W	27863252	European	2016	0.01209	0.003787	0.001415	+	173480	2	IVNT	Astle-W_Blood-Cell-Traits_EUR_2016
rs1056441	rs1056441	chr20:62370349	chr20:63738996	C/T	Other hearing loss	EFO_0004238	Neale B	UKBB	European	2017	0.0002319	7.27e-05	0.001419	+	337199	1	risk diff	Neale-B_UKBB_EUR_2017
rs1056441	rs1056441	chr20:62370349	chr20:63738996	C/T	Treatment with domperidone	EFO_0007056	Neale B	UKBB	European	2017	0.0003681	0.0001154	0.001423	+	337159	1	risk diff	Neale-B_UKBB_EUR_2017
rs1056441	rs1056441	chr20:62370349	chr20:63738996	C/T	Lumber spine bone mineral density	EFO_0007701	GEFOS	26367794	European	2015	0.03065	0.009381	0.001426	+	28498	12	Z-score	GEFOS_LSBMD_EUR_2015
rs1056441	rs1056441	chr20:62370349	chr20:63738996	C/T	Treatment with domperidone	EFO_0007056	Neale B	UKBB	European	2017	0.0003679	0.0001154	0.001431	+	337159	1	risk diff	Neale-B_UKBB_EUR_2017
rs1056441	rs1056441	chr20:62370349	chr20:63738996	C/T	Systolic blood pressure	EFO_0006335	Neale B	UKBB	European	2017	0.008353	0.002621	0.001435	+	317754	1	IVNT	Neale-B_UKBB_EUR_2017
rs1056441	rs1056441	chr20:62370349	chr20:63738996	C/T	Treatment with domperidone	EFO_0007056	Neale B	UKBB	European	2017	0.0003678	0.0001154	0.001435	+	337159	1	risk diff	Neale-B_UKBB_EUR_2017
rs1056441	rs1056441	chr20:62370349	chr20:63738996	C/T	Frequency of stair climbing in last 4 weeks	EFO_0008002	Neale B	UKBB	European	2017	-0.01075	0.003374	0.001442	-	334169	1	-	Neale-B_UKBB_EUR_2017
rs1056441	rs1056441	chr20:62370349	chr20:63738996	C/T	Lumber spine bone mineral density	EFO_0007701	GEFOS	26367794	European	2015	0.0306	0.00938	0.001447	+	28498	12	Z-score	GEFOS_LSBMD_EUR_2015
rs1056441	rs1056441	chr20:62370349	chr20:63738996	C/T	Treatment with omeprazole	EFO_0007056	Neale B	UKBB	European	2017	0.001925	0.0006045	0.00145	+	337159	1	risk diff	Neale-B_UKBB_EUR_2017
rs1056441	rs1056441	chr20:62370349	chr20:63738996	C/T	Pain type experienced in last month: none of the above	EFO_0003843	Neale B	UKBB	European	2017	-0.00404	0.001269	0.00145	-	336650	1	risk diff	Neale-B_UKBB_EUR_2017
rs1056441	rs1056441	chr20:62370349	chr20:63738996	C/T	Impedance of leg left	-	Neale B	UKBB	European	2017	0.007501	0.002357	0.00146	+	331296	1	IVNT	Neale-B_UKBB_EUR_2017
rs1056441	rs1056441	chr20:62370349	chr20:63738996	C/T	Illnesses of father: chronic bronchitis or emphysema	EFO_0006505;EFO_0000464	Neale B	UKBB	European	2017	0.002741	0.0008614	0.00146	+	294680	1	risk diff	Neale-B_UKBB_EUR_2017
rs1056441	rs1056441	chr20:62370349	chr20:63738996	C/T	Illnesses of father: chronic bronchitis or emphysema	EFO_0006505;EFO_0000464	Neale B	UKBB	European	2017	0.002743	0.0008622	0.001469	+	294680	1	risk diff	Neale-B_UKBB_EUR_2017
rs1056441	rs1056441	chr20:62370349	chr20:63738996	C/T	Monocyte count	EFO_0004586	Astle W	27863252	European	2016	0.01209	0.003804	0.001476	+	173480	2	IVNT	Astle-W_Blood-Cell-Traits_EUR_2016
rs1056441	rs1056441	chr20:62370349	chr20:63738996	C/T	Impedance of leg left	-	Neale B	UKBB	European	2017	0.007492	0.002357	0.001478	+	331296	1	IVNT	Neale-B_UKBB_EUR_2017
rs1056441	rs1056441	chr20:62370349	chr20:63738996	C/T	Treatment with omeprazole	EFO_0007056	Neale B	UKBB	European	2017	0.001921	0.0006044	0.001478	+	337159	1	risk diff	Neale-B_UKBB_EUR_2017
rs1056441	rs1056441	chr20:62370349	chr20:63738996	C/T	Impedance of leg left	-	Neale B	UKBB	European	2017	0.00749	0.002356	0.001481	+	331296	1	IVNT	Neale-B_UKBB_EUR_2017
rs1056441	rs1056441	chr20:62370349	chr20:63738996	C/T	Treatment with omeprazole	EFO_0007056	Neale B	UKBB	European	2017	0.001921	0.0006044	0.001486	+	337159	1	risk diff	Neale-B_UKBB_EUR_2017
rs1056441	rs1056441	chr20:62370349	chr20:63738996	C/T	Impedance of leg left	-	Neale B	UKBB	European	2017	0.007486	0.002357	0.001491	+	331296	1	IVNT	Neale-B_UKBB_EUR_2017
rs1056441	rs1056441	chr20:62370349	chr20:63738996	C/T	Illnesses of father: chronic bronchitis or emphysema	EFO_0006505;EFO_0000464	Neale B	UKBB	European	2017	0.002734	0.0008607	0.001493	+	294680	1	risk diff	Neale-B_UKBB_EUR_2017
rs1056441	rs1056441	chr20:62370349	chr20:63738996	C/T	Illnesses of father: chronic bronchitis or emphysema	EFO_0006505;EFO_0000464	Neale B	UKBB	European	2017	0.002733	0.0008606	0.001494	+	294680	1	risk diff	Neale-B_UKBB_EUR_2017
rs1056441	rs1056441	chr20:62370349	chr20:63738996	C/T	Illnesses of father: chronic bronchitis or emphysema	EFO_0006505;EFO_0000464	Neale B	UKBB	European	2017	0.002733	0.0008607	0.001495	+	294680	1	risk diff	Neale-B_UKBB_EUR_2017
rs1056441	rs1056441	chr20:62370349	chr20:63738996	C/T	Illnesses of father: chronic bronchitis or emphysema	EFO_0006505;EFO_0000464	Neale B	UKBB	European	2017	0.002719	0.0008563	0.001496	+	294680	1	risk diff	Neale-B_UKBB_EUR_2017
rs1056441	rs1056441	chr20:62370349	chr20:63738996	C/T	Red blood cell count	EFO_0004586	Astle W	27863252	European	2016	0.01202	0.003786	0.001497	+	173480	2	IVNT	Astle-W_Blood-Cell-Traits_EUR_2016
rs1056441	rs1056441	chr20:62370349	chr20:63738996	C/T	Diabetes diagnosed by doctor	EFO_0000400	Neale B	UKBB	European	2017	0.001763	0.0005552	0.001498	+	336473	1	risk diff	Neale-B_UKBB_EUR_2017
rs1056441	rs1056441	chr20:62370349	chr20:63738996	C/T	Illnesses of father: chronic bronchitis or emphysema	EFO_0006505;EFO_0000464	Neale B	UKBB	European	2017	0.002733	0.0008607	0.001498	+	294680	1	risk diff	Neale-B_UKBB_EUR_2017
rs1056441	rs1056441	chr20:62370349	chr20:63738996	C/T	Impedance of leg left	-	Neale B	UKBB	European	2017	0.007483	0.002357	0.001498	+	331296	1	IVNT	Neale-B_UKBB_EUR_2017
rs1056441	rs1056441	chr20:62370349	chr20:63738996	C/T	Illnesses of father: chronic bronchitis or emphysema	EFO_0006505;EFO_0000464	Neale B	UKBB	European	2017	0.002733	0.0008612	0.001506	+	294680	1	risk diff	Neale-B_UKBB_EUR_2017
rs1056441	rs1056441	chr20:62370349	chr20:63738996	C/T	Self-reported malabsorption or coeliac disease	EFO_0001060	Neale B	UKBB	European	2017	-0.0005399	0.0001701	0.001507	-	337159	1	risk diff	Neale-B_UKBB_EUR_2017
rs1056441	rs1056441	chr20:62370349	chr20:63738996	C/T	Systolic blood pressure	EFO_0006335	Neale B	UKBB	European	2017	0.008268	0.002606	0.001508	+	317754	1	IVNT	Neale-B_UKBB_EUR_2017
rs1056441	rs1056441	chr20:62370349	chr20:63738996	C/T	Arm fat-free mass right	-	Neale B	UKBB	European	2017	0.005108	0.00161	0.001514	+	331221	1	IVNT	Neale-B_UKBB_EUR_2017
rs1056441	rs1056441	chr20:62370349	chr20:63738996	C/T	Red blood cell count	EFO_0004586	Astle W	27863252	European	2016	0.01194	0.003764	0.001515	+	173480	2	IVNT	Astle-W_Blood-Cell-Traits_EUR_2016
rs1056441	rs1056441	chr20:62370349	chr20:63738996	C/T	Pain type experienced in last month: none of the above	EFO_0003843	Neale B	UKBB	European	2017	-0.004017	0.001267	0.00152	-	336650	1	risk diff	Neale-B_UKBB_EUR_2017
rs1056441	rs1056441	chr20:62370349	chr20:63738996	C/T	Illnesses of father: chronic bronchitis or emphysema	EFO_0006505;EFO_0000464	Neale B	UKBB	European	2017	0.002715	0.0008563	0.001523	+	294680	1	risk diff	Neale-B_UKBB_EUR_2017
rs1056441	rs1056441	chr20:62370349	chr20:63738996	C/T	Other hearing loss	EFO_0004238	Neale B	UKBB	European	2017	0.0002304	7.27e-05	0.001526	+	337199	1	risk diff	Neale-B_UKBB_EUR_2017
rs1056441	rs1056441	chr20:62370349	chr20:63738996	C/T	Monocyte count	EFO_0004586	Astle W	27863252	European	2016	0.01206	0.003804	0.001527	+	173480	2	IVNT	Astle-W_Blood-Cell-Traits_EUR_2016
rs1056441	rs1056441	chr20:62370349	chr20:63738996	C/T	Other hearing loss	EFO_0004238	Neale B	UKBB	European	2017	0.0002303	7.27e-05	0.00153	+	337199	1	risk diff	Neale-B_UKBB_EUR_2017
rs1056441	rs1056441	chr20:62370349	chr20:63738996	C/T	Other hearing loss	EFO_0004238	Neale B	UKBB	European	2017	0.0002303	7.27e-05	0.001533	+	337199	1	risk diff	Neale-B_UKBB_EUR_2017
rs1056441	rs1056441	chr20:62370349	chr20:63738996	C/T	Treatment with domperidone	EFO_0007056	Neale B	UKBB	European	2017	0.0003656	0.0001154	0.001535	+	337159	1	risk diff	Neale-B_UKBB_EUR_2017
rs1056441	rs1056441	chr20:62370349	chr20:63738996	C/T	Impedance of leg left	-	Neale B	UKBB	European	2017	0.007465	0.002357	0.001536	+	331296	1	IVNT	Neale-B_UKBB_EUR_2017
rs1056441	rs1056441	chr20:62370349	chr20:63738996	C/T	Other hearing loss	EFO_0004238	Neale B	UKBB	European	2017	0.0002302	7.27e-05	0.001538	+	337199	1	risk diff	Neale-B_UKBB_EUR_2017
rs1056441	rs1056441	chr20:62370349	chr20:63738996	C/T	Arm fat-free mass right	-	Neale B	UKBB	European	2017	0.005101	0.00161	0.00154	+	331221	1	IVNT	Neale-B_UKBB_EUR_2017
rs1056441	rs1056441	chr20:62370349	chr20:63738996	C/T	Red blood cell count	EFO_0004586	Astle W	27863252	European	2016	0.01199	0.003787	0.001541	+	173480	2	IVNT	Astle-W_Blood-Cell-Traits_EUR_2016
rs1056441	rs1056441	chr20:62370349	chr20:63738996	C/T	Monocyte count	EFO_0004586	Astle W	27863252	European	2016	0.01204	0.003803	0.001548	+	173480	2	IVNT	Astle-W_Blood-Cell-Traits_EUR_2016
rs1056441	rs1056441	chr20:62370349	chr20:63738996	C/T	Arm fat-free mass right	-	Neale B	UKBB	European	2017	0.005107	0.001614	0.001551	+	331221	1	IVNT	Neale-B_UKBB_EUR_2017
rs1056441	rs1056441	chr20:62370349	chr20:63738996	C/T	Other hearing loss	EFO_0004238	Neale B	UKBB	European	2017	0.00023	7.27e-05	0.001558	+	337199	1	risk diff	Neale-B_UKBB_EUR_2017
rs1056441	rs1056441	chr20:62370349	chr20:63738996	C/T	Frequency of stair climbing in last 4 weeks	EFO_0008002	Neale B	UKBB	European	2017	-0.01066	0.00337	0.001558	-	334169	1	-	Neale-B_UKBB_EUR_2017
rs1056441	rs1056441	chr20:62370349	chr20:63738996	C/T	Arm fat-free mass right	-	Neale B	UKBB	European	2017	0.005091	0.001611	0.001574	+	331221	1	IVNT	Neale-B_UKBB_EUR_2017
rs1056441	rs1056441	chr20:62370349	chr20:63738996	C/T	Treatment with omeprazole	EFO_0007056	Neale B	UKBB	European	2017	0.00191	0.0006044	0.001574	+	337159	1	risk diff	Neale-B_UKBB_EUR_2017
rs1056441	rs1056441	chr20:62370349	chr20:63738996	C/T	Systolic blood pressure	EFO_0006335	Neale B	UKBB	European	2017	0.008232	0.002606	0.001581	+	317754	1	IVNT	Neale-B_UKBB_EUR_2017
rs1056441	rs1056441	chr20:62370349	chr20:63738996	C/T	Treatment with domperidone	EFO_0007056	Neale B	UKBB	European	2017	0.0003646	0.0001154	0.001583	+	337159	1	risk diff	Neale-B_UKBB_EUR_2017
rs1056441	rs1056441	chr20:62370349	chr20:63738996	C/T	Treatment with domperidone	EFO_0007056	Neale B	UKBB	European	2017	0.0003648	0.0001156	0.001596	+	337159	1	risk diff	Neale-B_UKBB_EUR_2017
rs1056441	rs1056441	chr20:62370349	chr20:63738996	C/T	Treatment with omeprazole	EFO_0007056	Neale B	UKBB	European	2017	0.001922	0.0006088	0.001597	+	337159	1	risk diff	Neale-B_UKBB_EUR_2017
rs1056441	rs1056441	chr20:62370349	chr20:63738996	C/T	Overall health rating	-	Neale B	UKBB	European	2017	0.00593	0.001879	0.001599	+	336020	1	-	Neale-B_UKBB_EUR_2017
rs1056441	rs1056441	chr20:62370349	chr20:63738996	C/T	Red blood cell count	EFO_0004586	Astle W	27863252	European	2016	0.012	0.003803	0.0016	+	173480	2	IVNT	Astle-W_Blood-Cell-Traits_EUR_2016
rs1056441	rs1056441	chr20:62370349	chr20:63738996	C/T	Lumber spine bone mineral density	EFO_0007701	GEFOS	26367794	European	2015	0.03068	0.009493	0.001602	+	28498	12	Z-score	GEFOS_LSBMD_EUR_2015
rs1056441	rs1056441	chr20:62370349	chr20:63738996	C/T	Treatment with omeprazole	EFO_0007056	Neale B	UKBB	European	2017	0.001907	0.0006045	0.001608	+	337159	1	risk diff	Neale-B_UKBB_EUR_2017
rs1056441	rs1056441	chr20:62370349	chr20:63738996	C/T	Frequency of stair climbing in last 4 weeks	EFO_0008002	Neale B	UKBB	European	2017	-0.01062	0.003368	0.001618	-	334169	1	-	Neale-B_UKBB_EUR_2017
rs1056441	rs1056441	chr20:62370349	chr20:63738996	C/T	Self-reported malabsorption or coeliac disease	EFO_0001060	Neale B	UKBB	European	2017	-0.0005352	0.0001698	0.001623	-	337159	1	risk diff	Neale-B_UKBB_EUR_2017
rs1056441	rs1056441	chr20:62370349	chr20:63738996	C/T	Impedance of leg left	-	Neale B	UKBB	European	2017	0.007432	0.002359	0.001629	+	331296	1	IVNT	Neale-B_UKBB_EUR_2017
rs1056441	rs1056441	chr20:62370349	chr20:63738996	C/T	Frequency of stair climbing in last 4 weeks	EFO_0008002	Neale B	UKBB	European	2017	-0.01061	0.003368	0.001635	-	334169	1	-	Neale-B_UKBB_EUR_2017
rs1056441	rs1056441	chr20:62370349	chr20:63738996	C/T	Red blood cell count	EFO_0004586	Astle W	27863252	European	2016	0.01192	0.003785	0.001643	+	173480	2	IVNT	Astle-W_Blood-Cell-Traits_EUR_2016
rs1056441	rs1056441	chr20:62370349	chr20:63738996	C/T	Frequency of stair climbing in last 4 weeks	EFO_0008002	Neale B	UKBB	European	2017	-0.01061	0.003371	0.001645	-	334169	1	-	Neale-B_UKBB_EUR_2017
rs1056441	rs1056441	chr20:62370349	chr20:63738996	C/T	Pain type experienced in last month: none of the above	EFO_0003843	Neale B	UKBB	European	2017	-0.003985	0.001266	0.001645	-	336650	1	risk diff	Neale-B_UKBB_EUR_2017
rs1056441	rs1056441	chr20:62370349	chr20:63738996	C/T	Frequency of stair climbing in last 4 weeks	EFO_0008002	Neale B	UKBB	European	2017	-0.01061	0.00337	0.001647	-	334169	1	-	Neale-B_UKBB_EUR_2017
rs1056441	rs1056441	chr20:62370349	chr20:63738996	C/T	Diabetes diagnosed by doctor	EFO_0000400	Neale B	UKBB	European	2017	0.001746	0.0005547	0.001651	+	336473	1	risk diff	Neale-B_UKBB_EUR_2017
rs1056441	rs1056441	chr20:62370349	chr20:63738996	C/T	Self-reported malabsorption or coeliac disease	EFO_0001060	Neale B	UKBB	European	2017	-0.0005344	0.0001698	0.001653	-	337159	1	risk diff	Neale-B_UKBB_EUR_2017
rs1056441	rs1056441	chr20:62370349	chr20:63738996	C/T	Qualifications: college or university degree	EFO_0004784	Neale B	UKBB	European	2017	-0.00395	0.001256	0.001659	-	334070	1	risk diff	Neale-B_UKBB_EUR_2017
rs1056441	rs1056441	chr20:62370349	chr20:63738996	C/T	Frequency of stair climbing in last 4 weeks	EFO_0008002	Neale B	UKBB	European	2017	-0.01059	0.003368	0.001666	-	334169	1	-	Neale-B_UKBB_EUR_2017
rs1056441	rs1056441	chr20:62370349	chr20:63738996	C/T	Red blood cell count	EFO_0004586	Astle W	27863252	European	2016	0.0119	0.003785	0.00167	+	173480	2	IVNT	Astle-W_Blood-Cell-Traits_EUR_2016
rs1056441	rs1056441	chr20:62370349	chr20:63738996	C/T	Paroxysmal tachycardia	EFO_0005306	Neale B	UKBB	European	2017	0.0004919	0.0001565	0.001671	+	337199	1	risk diff	Neale-B_UKBB_EUR_2017
rs1056441	rs1056441	chr20:62370349	chr20:63738996	C/T	Systolic blood pressure	EFO_0006335	Neale B	UKBB	European	2017	0.008184	0.002605	0.00168	+	317754	1	IVNT	Neale-B_UKBB_EUR_2017
rs1056441	rs1056441	chr20:62370349	chr20:63738996	C/T	Self-reported malabsorption or coeliac disease	EFO_0001060	Neale B	UKBB	European	2017	-0.0005305	0.0001689	0.001685	-	337159	1	risk diff	Neale-B_UKBB_EUR_2017
rs1056441	rs1056441	chr20:62370349	chr20:63738996	C/T	Other specific joint derangements	-	Neale B	UKBB	European	2017	0.0004031	0.0001284	0.001686	+	337199	1	risk diff	Neale-B_UKBB_EUR_2017
rs1056441	rs1056441	chr20:62370349	chr20:63738996	C/T	Self-reported malabsorption or coeliac disease	EFO_0001060	Neale B	UKBB	European	2017	-0.0005304	0.0001689	0.001689	-	337159	1	risk diff	Neale-B_UKBB_EUR_2017
rs1056441	rs1056441	chr20:62370349	chr20:63738996	C/T	Frequency of stair climbing in last 4 weeks	EFO_0008002	Neale B	UKBB	European	2017	-0.01057	0.003368	0.001704	-	334169	1	-	Neale-B_UKBB_EUR_2017
rs1056441	rs1056441	chr20:62370349	chr20:63738996	C/T	Self-reported malabsorption or coeliac disease	EFO_0001060	Neale B	UKBB	European	2017	-0.0005299	0.0001689	0.001705	-	337159	1	risk diff	Neale-B_UKBB_EUR_2017
rs1056441	rs1056441	chr20:62370349	chr20:63738996	C/T	Frequency of stair climbing in last 4 weeks	EFO_0008002	Neale B	UKBB	European	2017	-0.01056	0.003368	0.00171	-	334169	1	-	Neale-B_UKBB_EUR_2017
rs1056441	rs1056441	chr20:62370349	chr20:63738996	C/T	Systolic blood pressure	EFO_0006335	Neale B	UKBB	European	2017	0.008228	0.002624	0.001713	+	317754	1	IVNT	Neale-B_UKBB_EUR_2017
rs1056441	rs1056441	chr20:62370349	chr20:63738996	C/T	Arm fat-free mass right	-	Neale B	UKBB	European	2017	0.005051	0.001611	0.001715	+	331221	1	IVNT	Neale-B_UKBB_EUR_2017
rs1056441	rs1056441	chr20:62370349	chr20:63738996	C/T	Pain type experienced in last month: none of the above	EFO_0003843	Neale B	UKBB	European	2017	-0.003973	0.001267	0.001715	-	336650	1	risk diff	Neale-B_UKBB_EUR_2017
rs1056441	rs1056441	chr20:62370349	chr20:63738996	C/T	Systolic blood pressure	EFO_0006335	Neale B	UKBB	European	2017	0.008168	0.002605	0.001717	+	317754	1	IVNT	Neale-B_UKBB_EUR_2017
rs1056441	rs1056441	chr20:62370349	chr20:63738996	C/T	Frequency of stair climbing in last 4 weeks	EFO_0008002	Neale B	UKBB	European	2017	-0.01055	0.003368	0.001725	-	334169	1	-	Neale-B_UKBB_EUR_2017
rs1056441	rs1056441	chr20:62370349	chr20:63738996	C/T	Diverticular disease of intestine	EFO_1001460	Neale B	UKBB	European	2017	-0.001141	0.0003642	0.001727	-	337199	1	risk diff	Neale-B_UKBB_EUR_2017
rs1056441	rs1056441	chr20:62370349	chr20:63738996	C/T	Illnesses of father: chronic bronchitis or emphysema	EFO_0006505;EFO_0000464	Neale B	UKBB	European	2017	0.002682	0.0008561	0.00173	+	294680	1	risk diff	Neale-B_UKBB_EUR_2017
rs1056441	rs1056441	chr20:62370349	chr20:63738996	C/T	Self-reported malabsorption or coeliac disease	EFO_0001060	Neale B	UKBB	European	2017	-0.000532	0.0001699	0.001746	-	337159	1	risk diff	Neale-B_UKBB_EUR_2017
rs1056441	rs1056441	chr20:62370349	chr20:63738996	C/T	Diabetes diagnosed by doctor	EFO_0000400	Neale B	UKBB	European	2017	0.001736	0.0005546	0.001747	+	336473	1	risk diff	Neale-B_UKBB_EUR_2017
rs1056441	rs1056441	chr20:62370349	chr20:63738996	C/T	Illnesses of father: chronic bronchitis or emphysema	EFO_0006505;EFO_0000464	Neale B	UKBB	European	2017	0.00268	0.0008561	0.001747	+	294680	1	risk diff	Neale-B_UKBB_EUR_2017
rs1056441	rs1056441	chr20:62370349	chr20:63738996	C/T	Self-reported malabsorption or coeliac disease	EFO_0001060	Neale B	UKBB	European	2017	-0.0005318	0.0001699	0.00175	-	337159	1	risk diff	Neale-B_UKBB_EUR_2017
rs1056441	rs1056441	chr20:62370349	chr20:63738996	C/T	Self-reported prostate cancer	EFO_0001663	Neale B	UKBB	European	2017	0.000689	0.0002201	0.00175	+	337159	1	risk diff	Neale-B_UKBB_EUR_2017
rs1056441	rs1056441	chr20:62370349	chr20:63738996	C/T	Overall health rating	-	Neale B	UKBB	European	2017	0.005885	0.00188	0.001751	+	336020	1	-	Neale-B_UKBB_EUR_2017
rs1056441	rs1056441	chr20:62370349	chr20:63738996	C/T	Self-reported malabsorption or coeliac disease	EFO_0001060	Neale B	UKBB	European	2017	-0.0005287	0.0001689	0.001752	-	337159	1	risk diff	Neale-B_UKBB_EUR_2017
rs1056441	rs1056441	chr20:62370349	chr20:63738996	C/T	Illnesses of father: chronic bronchitis or emphysema	EFO_0006505;EFO_0000464	Neale B	UKBB	European	2017	0.002679	0.000856	0.001754	+	294680	1	risk diff	Neale-B_UKBB_EUR_2017
rs1056441	rs1056441	chr20:62370349	chr20:63738996	C/T	Self-reported malabsorption or coeliac disease	EFO_0001060	Neale B	UKBB	European	2017	-0.0005313	0.0001698	0.001757	-	337159	1	risk diff	Neale-B_UKBB_EUR_2017
rs1056441	rs1056441	chr20:62370349	chr20:63738996	C/T	Treatment with omeprazole	EFO_0007056	Neale B	UKBB	European	2017	0.001902	0.000608	0.001761	+	337159	1	risk diff	Neale-B_UKBB_EUR_2017
rs1056441	rs1056441	chr20:62370349	chr20:63738996	C/T	Illnesses of father: chronic bronchitis or emphysema	EFO_0006505;EFO_0000464	Neale B	UKBB	European	2017	0.002678	0.0008562	0.001765	+	294680	1	risk diff	Neale-B_UKBB_EUR_2017
rs1056441	rs1056441	chr20:62370349	chr20:63738996	C/T	Frequency of stair climbing in last 4 weeks	EFO_0008002	Neale B	UKBB	European	2017	-0.01052	0.003368	0.001785	-	334169	1	-	Neale-B_UKBB_EUR_2017
rs1056441	rs1056441	chr20:62370349	chr20:63738996	C/T	Lumber spine bone mineral density	EFO_0007701	GEFOS	26367794	European	2015	0.03003	0.009384	0.001786	+	28498	12	Z-score	GEFOS_LSBMD_EUR_2015
rs1056441	rs1056441	chr20:62370349	chr20:63738996	C/T	Asthma	EFO_0000270	Neale B	UKBB	European	2017	0.00268	0.0008581	0.001791	+	336782	1	risk diff	Neale-B_UKBB_EUR_2017
rs1056441	rs1056441	chr20:62370349	chr20:63738996	C/T	Self-reported malabsorption or coeliac disease	EFO_0001060	Neale B	UKBB	European	2017	-0.0005302	0.0001698	0.001793	-	337159	1	risk diff	Neale-B_UKBB_EUR_2017
rs1056441	rs1056441	chr20:62370349	chr20:63738996	C/T	Height	EFO_0004339	GIANT	25282103	European	2014	0.0097	0.0031	0.0018	+	253280	79	Z-score	GIANT_Height_EUR_2014
rs1056441	rs1056441	chr20:62370349	chr20:63738996	C/T	Self-reported malabsorption or coeliac disease	EFO_0001060	Neale B	UKBB	European	2017	-0.000528	0.0001692	0.001804	-	337159	1	risk diff	Neale-B_UKBB_EUR_2017
rs1056441	rs1056441	chr20:62370349	chr20:63738996	C/T	Frequency of stair climbing in last 4 weeks	EFO_0008002	Neale B	UKBB	European	2017	-0.0105	0.003368	0.001819	-	334169	1	-	Neale-B_UKBB_EUR_2017
rs1056441	rs1056441	chr20:62370349	chr20:63738996	C/T	Red blood cell count	EFO_0004586	Astle W	27863252	European	2016	0.0118	0.003785	0.001819	+	173480	2	IVNT	Astle-W_Blood-Cell-Traits_EUR_2016
rs1056441	rs1056441	chr20:62370349	chr20:63738996	C/T	Impedance of leg left	-	Neale B	UKBB	European	2017	0.007347	0.002358	0.001837	+	331296	1	IVNT	Neale-B_UKBB_EUR_2017
rs1056441	rs1056441	chr20:62370349	chr20:63738996	C/T	Diverticular disease of intestine	EFO_1001460	Neale B	UKBB	European	2017	-0.001135	0.0003642	0.001839	-	337199	1	risk diff	Neale-B_UKBB_EUR_2017
rs1056441	rs1056441	chr20:62370349	chr20:63738996	C/T	Other hearing loss	EFO_0004238	Neale B	UKBB	European	2017	0.0002265	7.27e-05	0.001843	+	337199	1	risk diff	Neale-B_UKBB_EUR_2017
rs1056441	rs1056441	chr20:62370349	chr20:63738996	C/T	Overall health rating	-	Neale B	UKBB	European	2017	0.005849	0.001878	0.001846	+	336020	1	-	Neale-B_UKBB_EUR_2017
rs1056441	rs1056441	chr20:62370349	chr20:63738996	C/T	Poisoning by nonopioid analgesics, antipyretics and antirheumatics	EFO_0008546	Neale B	UKBB	European	2017	0.0004072	0.0001309	0.001865	+	337199	1	risk diff	Neale-B_UKBB_EUR_2017
rs1056441	rs1056441	chr20:62370349	chr20:63738996	C/T	Diverticular disease of intestine	EFO_1001460	Neale B	UKBB	European	2017	-0.001133	0.0003642	0.00187	-	337199	1	risk diff	Neale-B_UKBB_EUR_2017
rs1056441	rs1056441	chr20:62370349	chr20:63738996	C/T	Poisoning by nonopioid analgesics, antipyretics and antirheumatics	EFO_0008546	Neale B	UKBB	European	2017	0.0004068	0.0001309	0.001881	+	337199	1	risk diff	Neale-B_UKBB_EUR_2017
rs1056441	rs1056441	chr20:62370349	chr20:63738996	C/T	Systolic blood pressure	EFO_0006335	Neale B	UKBB	European	2017	0.008142	0.002619	0.001882	+	317754	1	IVNT	Neale-B_UKBB_EUR_2017
rs1056441	rs1056441	chr20:62370349	chr20:63738996	C/T	Systolic blood pressure	EFO_0006335	Neale B	UKBB	European	2017	0.00814	0.002619	0.001883	+	317754	1	IVNT	Neale-B_UKBB_EUR_2017
rs1056441	rs1056441	chr20:62370349	chr20:63738996	C/T	Self-reported malabsorption or coeliac disease	EFO_0001060	Neale B	UKBB	European	2017	-0.0005281	0.00017	0.001889	-	337159	1	risk diff	Neale-B_UKBB_EUR_2017
rs1056441	rs1056441	chr20:62370349	chr20:63738996	C/T	Systolic blood pressure	EFO_0006335	Neale B	UKBB	European	2017	0.008135	0.002619	0.001895	+	317754	1	IVNT	Neale-B_UKBB_EUR_2017
rs1056441	rs1056441	chr20:62370349	chr20:63738996	C/T	Self-reported prostate cancer	EFO_0001663	Neale B	UKBB	European	2017	0.0006849	0.0002205	0.001896	+	337159	1	risk diff	Neale-B_UKBB_EUR_2017
rs1056441	rs1056441	chr20:62370349	chr20:63738996	C/T	Height	EFO_0004339	GIANT	25282103	European	2014	0.0097	0.0031	0.0019	+	253280	79	Z-score	GIANT_Height_EUR_2014
rs1056441	rs1056441	chr20:62370349	chr20:63738996	C/T	Systolic blood pressure	EFO_0006335	Neale B	UKBB	European	2017	0.008132	0.002619	0.001903	+	317754	1	IVNT	Neale-B_UKBB_EUR_2017
rs1056441	rs1056441	chr20:62370349	chr20:63738996	C/T	Lumber spine bone mineral density	EFO_0007701	GEFOS	26367794	European	2015	0.03033	0.009572	0.001903	+	28498	12	Z-score	GEFOS_LSBMD_EUR_2015
rs1056441	rs1056441	chr20:62370349	chr20:63738996	C/T	Illnesses of father: chronic bronchitis or emphysema	EFO_0006505;EFO_0000464	Neale B	UKBB	European	2017	0.002662	0.0008575	0.001908	+	294680	1	risk diff	Neale-B_UKBB_EUR_2017
rs1056441	rs1056441	chr20:62370349	chr20:63738996	C/T	Self-reported malabsorption or coeliac disease	EFO_0001060	Neale B	UKBB	European	2017	-0.0005244	0.0001689	0.00191	-	337159	1	risk diff	Neale-B_UKBB_EUR_2017
rs1056441	rs1056441	chr20:62370349	chr20:63738996	C/T	Red blood cell count	EFO_0004586	Astle W	27863252	European	2016	0.01176	0.003791	0.001921	+	173480	2	IVNT	Astle-W_Blood-Cell-Traits_EUR_2016
rs1056441	rs1056441	chr20:62370349	chr20:63738996	C/T	Red blood cell count	EFO_0004586	Astle W	27863252	European	2016	0.01174	0.003786	0.001923	+	173480	2	IVNT	Astle-W_Blood-Cell-Traits_EUR_2016
rs1056441	rs1056441	chr20:62370349	chr20:63738996	C/T	Poisoning by nonopioid analgesics, antipyretics and antirheumatics	EFO_0008546	Neale B	UKBB	European	2017	0.0004059	0.0001309	0.001926	+	337199	1	risk diff	Neale-B_UKBB_EUR_2017
rs1056441	rs1056441	chr20:62370349	chr20:63738996	C/T	Poisoning by nonopioid analgesics, antipyretics and antirheumatics	EFO_0008546	Neale B	UKBB	European	2017	0.0004057	0.0001309	0.001939	+	337199	1	risk diff	Neale-B_UKBB_EUR_2017
rs1056441	rs1056441	chr20:62370349	chr20:63738996	C/T	Self-reported malabsorption or coeliac disease	EFO_0001060	Neale B	UKBB	European	2017	-0.0005262	0.0001698	0.001944	-	337159	1	risk diff	Neale-B_UKBB_EUR_2017
rs1056441	rs1056441	chr20:62370349	chr20:63738996	C/T	Poisoning by nonopioid analgesics, antipyretics and antirheumatics	EFO_0008546	Neale B	UKBB	European	2017	0.0004055	0.0001309	0.001947	+	337199	1	risk diff	Neale-B_UKBB_EUR_2017
rs1056441	rs1056441	chr20:62370349	chr20:63738996	C/T	Diabetes diagnosed by doctor	EFO_0000400	Neale B	UKBB	European	2017	0.001717	0.0005541	0.00195	+	336473	1	risk diff	Neale-B_UKBB_EUR_2017
rs1056441	rs1056441	chr20:62370349	chr20:63738996	C/T	Poisoning by nonopioid analgesics, antipyretics and antirheumatics	EFO_0008546	Neale B	UKBB	European	2017	0.0004054	0.0001309	0.001951	+	337199	1	risk diff	Neale-B_UKBB_EUR_2017
rs1056441	rs1056441	chr20:62370349	chr20:63738996	C/T	Self-reported malabsorption or coeliac disease	EFO_0001060	Neale B	UKBB	European	2017	-0.0005259	0.0001698	0.001953	-	337159	1	risk diff	Neale-B_UKBB_EUR_2017
rs1056441	rs1056441	chr20:62370349	chr20:63738996	C/T	B:%Mature; Mature B	OBA_VT1000783	Roederer M	25772697	European	2015	0.06745	0.02178	0.001954	+	456	1	-	Roederer-M_Immune-System_EUR_2015
rs1056441	rs1056441	chr20:62370349	chr20:63738996	C/T	Self-reported malabsorption or coeliac disease	EFO_0001060	Neale B	UKBB	European	2017	-0.0005257	0.0001698	0.001962	-	337159	1	risk diff	Neale-B_UKBB_EUR_2017
rs1056441	rs1056441	chr20:62370349	chr20:63738996	C/T	Systolic blood pressure	EFO_0006335	Neale B	UKBB	European	2017	0.008058	0.002605	0.001978	+	317754	1	IVNT	Neale-B_UKBB_EUR_2017
rs1056441	rs1056441	chr20:62370349	chr20:63738996	C/T	Self-reported malabsorption or coeliac disease	EFO_0001060	Neale B	UKBB	European	2017	-0.0005251	0.0001698	0.001986	-	337159	1	risk diff	Neale-B_UKBB_EUR_2017
rs1056441	rs1056441	chr20:62370349	chr20:63738996	C/T	Systolic blood pressure	EFO_0006335	Neale B	UKBB	European	2017	0.008099	0.002619	0.001986	+	317754	1	IVNT	Neale-B_UKBB_EUR_2017
rs1056441	rs1056441	chr20:62370349	chr20:63738996	C/T	Diabetes diagnosed by doctor	EFO_0000400	Neale B	UKBB	European	2017	0.001714	0.0005545	0.001999	+	336473	1	risk diff	Neale-B_UKBB_EUR_2017
rs1056441	rs1056441	chr20:62370349	chr20:63738996	C/T	White blood cell count	EFO_0004586	Astle W	27863252	European	2016	0.01184	0.003833	0.002002	+	173480	2	IVNT	Astle-W_Blood-Cell-Traits_EUR_2016
rs1056441	rs1056441	chr20:62370349	chr20:63738996	C/T	Treatment with omeprazole	EFO_0007056	Neale B	UKBB	European	2017	0.001877	0.0006076	0.002003	+	337159	1	risk diff	Neale-B_UKBB_EUR_2017
rs1056441	rs1056441	chr20:62370349	chr20:63738996	C/T	Illnesses of father: chronic bronchitis or emphysema	EFO_0006505;EFO_0000464	Neale B	UKBB	European	2017	0.002642	0.0008555	0.002012	+	294680	1	risk diff	Neale-B_UKBB_EUR_2017
rs1056441	rs1056441	chr20:62370349	chr20:63738996	C/T	Red blood cell count	EFO_0004586	Astle W	27863252	European	2016	0.01169	0.003786	0.002017	+	173480	2	IVNT	Astle-W_Blood-Cell-Traits_EUR_2016
rs1056441	rs1056441	chr20:62370349	chr20:63738996	C/T	Diabetes diagnosed by doctor	EFO_0000400	Neale B	UKBB	European	2017	0.001709	0.0005543	0.002042	+	336473	1	risk diff	Neale-B_UKBB_EUR_2017
rs1056441	rs1056441	chr20:62370349	chr20:63738996	C/T	Monocyte count	EFO_0004586	Astle W	27863252	European	2016	0.01176	0.003812	0.002042	+	173480	2	IVNT	Astle-W_Blood-Cell-Traits_EUR_2016
rs1056441	rs1056441	chr20:62370349	chr20:63738996	C/T	Treatment with omeprazole	EFO_0007056	Neale B	UKBB	European	2017	0.001874	0.0006077	0.002045	+	337159	1	risk diff	Neale-B_UKBB_EUR_2017
rs1056441	rs1056441	chr20:62370349	chr20:63738996	C/T	Impedance of leg left	-	Neale B	UKBB	European	2017	0.00728	0.002361	0.002047	+	331296	1	IVNT	Neale-B_UKBB_EUR_2017
rs1056441	rs1056441	chr20:62370349	chr20:63738996	C/T	Treatment with omeprazole	EFO_0007056	Neale B	UKBB	European	2017	0.001865	0.0006054	0.002062	+	337159	1	risk diff	Neale-B_UKBB_EUR_2017
rs1056441	rs1056441	chr20:62370349	chr20:63738996	C/T	Lumber spine bone mineral density	EFO_0007701	GEFOS	26367794	European	2015	0.02987	0.009465	0.002066	+	28498	12	Z-score	GEFOS_LSBMD_EUR_2015
rs1056441	rs1056441	chr20:62370349	chr20:63738996	C/T	Diverticular disease of intestine	EFO_1001460	Neale B	UKBB	European	2017	-0.001122	0.0003643	0.00208	-	337199	1	risk diff	Neale-B_UKBB_EUR_2017
rs1056441	rs1056441	chr20:62370349	chr20:63738996	C/T	Systolic blood pressure	EFO_0006335	Neale B	UKBB	European	2017	0.008062	0.002619	0.002083	+	317754	1	IVNT	Neale-B_UKBB_EUR_2017
rs1056441	rs1056441	chr20:62370349	chr20:63738996	C/T	Systolic blood pressure	EFO_0006335	Neale B	UKBB	European	2017	0.008029	0.002609	0.00209	+	317754	1	IVNT	Neale-B_UKBB_EUR_2017
rs1056441	rs1056441	chr20:62370349	chr20:63738996	C/T	Self-reported prostate cancer	EFO_0001663	Neale B	UKBB	European	2017	0.0006774	0.0002202	0.002092	+	337159	1	risk diff	Neale-B_UKBB_EUR_2017
rs1056441	rs1056441	chr20:62370349	chr20:63738996	C/T	Height	EFO_0004339	Neale B	UKBB	European	2017	0.005654	0.001839	0.002104	+	336474	1	IVNT	Neale-B_UKBB_EUR_2017
rs1056441	rs1056441	chr20:62370349	chr20:63738996	C/T	Diabetes diagnosed by doctor	EFO_0000400	Neale B	UKBB	European	2017	0.001704	0.0005542	0.002108	+	336473	1	risk diff	Neale-B_UKBB_EUR_2017
rs1056441	rs1056441	chr20:62370349	chr20:63738996	C/T	Low density lipoprotein	EFO_0004611	GLGC	24097068	European	2013	-0.0135	0.0041	0.002116	-	173082	60	IVNT	GLGC_LDL_EUR_2013
rs1056441	rs1056441	chr20:62370349	chr20:63738996	C/T	Poisoning by nonopioid analgesics, antipyretics and antirheumatics	EFO_0008546	Neale B	UKBB	European	2017	0.0004019	0.000131	0.002148	+	337199	1	risk diff	Neale-B_UKBB_EUR_2017
rs1056441	rs1056441	chr20:62370349	chr20:63738996	C/T	Monocyte count	EFO_0004586	Astle W	27863252	European	2016	0.01168	0.003807	0.002151	+	173480	2	IVNT	Astle-W_Blood-Cell-Traits_EUR_2016
rs1056441	rs1056441	chr20:62370349	chr20:63738996	C/T	Diabetes diagnosed by doctor	EFO_0000400	Neale B	UKBB	European	2017	0.001699	0.0005542	0.002166	+	336473	1	risk diff	Neale-B_UKBB_EUR_2017
rs1056441	rs1056441	chr20:62370349	chr20:63738996	C/T	Diabetes diagnosed by doctor	EFO_0000400	Neale B	UKBB	European	2017	0.001699	0.0005542	0.002174	+	336473	1	risk diff	Neale-B_UKBB_EUR_2017
rs1056441	rs1056441	chr20:62370349	chr20:63738996	C/T	Diabetes diagnosed by doctor	EFO_0000400	Neale B	UKBB	European	2017	0.001699	0.0005542	0.002175	+	336473	1	risk diff	Neale-B_UKBB_EUR_2017
rs1056441	rs1056441	chr20:62370349	chr20:63738996	C/T	Systolic blood pressure	EFO_0006335	Neale B	UKBB	European	2017	0.008028	0.002619	0.002175	+	317754	1	IVNT	Neale-B_UKBB_EUR_2017
rs1056441	rs1056441	chr20:62370349	chr20:63738996	C/T	Self-reported prostate cancer	EFO_0001663	Neale B	UKBB	European	2017	0.0006745	0.0002202	0.002186	+	337159	1	risk diff	Neale-B_UKBB_EUR_2017
rs1056441	rs1056441	chr20:62370349	chr20:63738996	C/T	Hematocrit	EFO_0004586	Astle W	27863252	European	2016	0.01145	0.003739	0.002196	+	173480	2	IVNT	Astle-W_Blood-Cell-Traits_EUR_2016
rs1056441	rs1056441	chr20:62370349	chr20:63738996	C/T	Height	EFO_0004339	GIANT	28146470	European	2017	0.0085	0.0028	0.0022	+	381625	106	IVNT	GIANT_Height_EUR_2017
rs1056441	rs1056441	chr20:62370349	chr20:63738996	C/T	Treatment with omeprazole	EFO_0007056	Neale B	UKBB	European	2017	0.001858	0.0006076	0.002225	+	337159	1	risk diff	Neale-B_UKBB_EUR_2017
rs1056441	rs1056441	chr20:62370349	chr20:63738996	C/T	Lumber spine bone mineral density	EFO_0007701	GEFOS	26367794	European	2015	0.02957	0.009445	0.002242	+	28498	12	Z-score	GEFOS_LSBMD_EUR_2015
rs1056441	rs1056441	chr20:62370349	chr20:63738996	C/T	Height	EFO_0004339	Neale B	UKBB	European	2017	0.005612	0.001838	0.002263	+	336474	1	IVNT	Neale-B_UKBB_EUR_2017
rs1056441	rs1056441	chr20:62370349	chr20:63738996	C/T	Treatment with omeprazole	EFO_0007056	Neale B	UKBB	European	2017	0.001855	0.0006076	0.002269	+	337159	1	risk diff	Neale-B_UKBB_EUR_2017
rs1056441	rs1056441	chr20:62370349	chr20:63738996	C/T	Diabetes diagnosed by doctor	EFO_0000400	Neale B	UKBB	European	2017	0.001692	0.0005542	0.00227	+	336473	1	risk diff	Neale-B_UKBB_EUR_2017
rs1056441	rs1056441	chr20:62370349	chr20:63738996	C/T	Frequency of stair climbing in last 4 weeks	EFO_0008002	Neale B	UKBB	European	2017	-0.01022	0.003351	0.002282	-	334169	1	-	Neale-B_UKBB_EUR_2017
rs1056441	rs1056441	chr20:62370349	chr20:63738996	C/T	Treatment with fybogel mebeverine sachet	EFO_0007056	Neale B	UKBB	European	2017	0.000298	9.77e-05	0.002282	+	337159	1	risk diff	Neale-B_UKBB_EUR_2017
rs1056441	rs1056441	chr20:62370349	chr20:63738996	C/T	Frequency of stair climbing in last 4 weeks	EFO_0008002	Neale B	UKBB	European	2017	-0.01021	0.00335	0.002296	-	334169	1	-	Neale-B_UKBB_EUR_2017
rs1056441	rs1056441	chr20:62370349	chr20:63738996	C/T	Systolic blood pressure	EFO_0006335	Neale B	UKBB	European	2017	0.007991	0.002621	0.002299	+	317754	1	IVNT	Neale-B_UKBB_EUR_2017
rs1056441	rs1056441	chr20:62370349	chr20:63738996	C/T	Doctor diagnosed asthma	EFO_0000270	Neale B	UKBB	European	2017	0.005251	0.001722	0.002299	+	83529	1	risk diff	Neale-B_UKBB_EUR_2017
rs1056441	rs1056441	chr20:62370349	chr20:63738996	C/T	Self-reported asthma	EFO_0000270	Neale B	UKBB	European	2017	0.00262	0.0008597	0.002304	+	337159	1	risk diff	Neale-B_UKBB_EUR_2017
rs1056441	rs1056441	chr20:62370349	chr20:63738996	C/T	Frequency of stair climbing in last 4 weeks	EFO_0008002	Neale B	UKBB	European	2017	-0.01021	0.003351	0.002307	-	334169	1	-	Neale-B_UKBB_EUR_2017
rs1056441	rs1056441	chr20:62370349	chr20:63738996	C/T	Treatment with omeprazole	EFO_0007056	Neale B	UKBB	European	2017	0.001851	0.0006077	0.002313	+	337159	1	risk diff	Neale-B_UKBB_EUR_2017
rs1056441	rs1056441	chr20:62370349	chr20:63738996	C/T	Diabetes diagnosed by doctor	EFO_0000400	Neale B	UKBB	European	2017	0.001688	0.0005542	0.002315	+	336473	1	risk diff	Neale-B_UKBB_EUR_2017
rs1056441	rs1056441	chr20:62370349	chr20:63738996	C/T	B:%Mature; Mature B	OBA_VT1000783	Roederer M	25772697	European	2015	0.06817	0.02238	0.00232	+	456	1	-	Roederer-M_Immune-System_EUR_2015
rs1056441	rs1056441	chr20:62370349	chr20:63738996	C/T	Frequency of stair climbing in last 4 weeks	EFO_0008002	Neale B	UKBB	European	2017	-0.0102	0.00335	0.002325	-	334169	1	-	Neale-B_UKBB_EUR_2017
rs1056441	rs1056441	chr20:62370349	chr20:63738996	C/T	Height	EFO_0004339	Neale B	UKBB	European	2017	0.005597	0.001838	0.002326	+	336474	1	IVNT	Neale-B_UKBB_EUR_2017
rs1056441	rs1056441	chr20:62370349	chr20:63738996	C/T	Frequency of stair climbing in last 4 weeks	EFO_0008002	Neale B	UKBB	European	2017	-0.0102	0.00335	0.00233	-	334169	1	-	Neale-B_UKBB_EUR_2017
rs1056441	rs1056441	chr20:62370349	chr20:63738996	C/T	Emphysema or chronic bronchitis	EFO_0000464;EFO_0006505	Neale B	UKBB	European	2017	0.001011	0.000332	0.002331	+	336782	1	risk diff	Neale-B_UKBB_EUR_2017
rs1056441	rs1056441	chr20:62370349	chr20:63738996	C/T	Treatment with omeprazole	EFO_0007056	Neale B	UKBB	European	2017	0.001849	0.0006076	0.002338	+	337159	1	risk diff	Neale-B_UKBB_EUR_2017
rs1056441	rs1056441	chr20:62370349	chr20:63738996	C/T	Lumber spine bone mineral density	EFO_0007701	GEFOS	26367794	European	2015	0.0295	0.009462	0.002338	+	28498	12	Z-score	GEFOS_LSBMD_EUR_2015
rs1056441	rs1056441	chr20:62370349	chr20:63738996	C/T	Treatment with omeprazole	EFO_0007056	Neale B	UKBB	European	2017	0.001849	0.0006076	0.002344	+	337159	1	risk diff	Neale-B_UKBB_EUR_2017
rs1056441	rs1056441	chr20:62370349	chr20:63738996	C/T	Treatment with omeprazole	EFO_0007056	Neale B	UKBB	European	2017	0.001849	0.0006076	0.002349	+	337159	1	risk diff	Neale-B_UKBB_EUR_2017
rs1056441	rs1056441	chr20:62370349	chr20:63738996	C/T	Height	EFO_0004339	Neale B	UKBB	European	2017	0.005583	0.001837	0.002374	+	336474	1	IVNT	Neale-B_UKBB_EUR_2017
rs1056441	rs1056441	chr20:62370349	chr20:63738996	C/T	Treatment with fybogel mebeverine sachet	EFO_0007056	Neale B	UKBB	European	2017	0.0002968	9.77e-05	0.002378	+	337159	1	risk diff	Neale-B_UKBB_EUR_2017
rs1056441	rs1056441	chr20:62370349	chr20:63738996	C/T	Height	EFO_0004339	Neale B	UKBB	European	2017	0.005581	0.001837	0.002379	+	336474	1	IVNT	Neale-B_UKBB_EUR_2017
rs1056441	rs1056441	chr20:62370349	chr20:63738996	C/T	Treatment with fybogel mebeverine sachet	EFO_0007056	Neale B	UKBB	European	2017	0.0002968	9.77e-05	0.002379	+	337159	1	risk diff	Neale-B_UKBB_EUR_2017
rs1056441	rs1056441	chr20:62370349	chr20:63738996	C/T	Diverticular disease of intestine	EFO_1001460	Neale B	UKBB	European	2017	-0.001107	0.0003643	0.002384	-	337199	1	risk diff	Neale-B_UKBB_EUR_2017
rs1056441	rs1056441	chr20:62370349	chr20:63738996	C/T	Treatment with omeprazole	EFO_0007056	Neale B	UKBB	European	2017	0.001836	0.0006045	0.002392	+	337159	1	risk diff	Neale-B_UKBB_EUR_2017
rs1056441	rs1056441	chr20:62370349	chr20:63738996	C/T	Systolic blood pressure	EFO_0006335	Neale B	UKBB	European	2017	0.007961	0.002622	0.002393	+	317754	1	IVNT	Neale-B_UKBB_EUR_2017
rs1056441	rs1056441	chr20:62370349	chr20:63738996	C/T	Poisoning by nonopioid analgesics, antipyretics and antirheumatics	EFO_0008546	Neale B	UKBB	European	2017	0.0003974	0.0001309	0.002397	+	337199	1	risk diff	Neale-B_UKBB_EUR_2017
rs1056441	rs1056441	chr20:62370349	chr20:63738996	C/T	Number of incorrect matches in round	-	Neale B	UKBB	European	2017	-0.007632	0.002514	0.002399	-	336881	1	IVNT	Neale-B_UKBB_EUR_2017
rs1056441	rs1056441	chr20:62370349	chr20:63738996	C/T	Height	EFO_0004339	Neale B	UKBB	European	2017	0.005575	0.001837	0.002402	+	336474	1	IVNT	Neale-B_UKBB_EUR_2017
rs1056441	rs1056441	chr20:62370349	chr20:63738996	C/T	Systolic blood pressure	EFO_0006335	Neale B	UKBB	European	2017	0.00795	0.002619	0.002404	+	317754	1	IVNT	Neale-B_UKBB_EUR_2017
rs1056441	rs1056441	chr20:62370349	chr20:63738996	C/T	Height	EFO_0004339	Neale B	UKBB	European	2017	0.005575	0.001837	0.002404	+	336474	1	IVNT	Neale-B_UKBB_EUR_2017
rs1056441	rs1056441	chr20:62370349	chr20:63738996	C/T	Other hearing loss	EFO_0004238	Neale B	UKBB	European	2017	0.0002193	7.23e-05	0.002419	+	337199	1	risk diff	Neale-B_UKBB_EUR_2017
rs1056441	rs1056441	chr20:62370349	chr20:63738996	C/T	Poisoning by nonopioid analgesics, antipyretics and antirheumatics	EFO_0008546	Neale B	UKBB	European	2017	0.0003968	0.0001309	0.002428	+	337199	1	risk diff	Neale-B_UKBB_EUR_2017
rs1056441	rs1056441	chr20:62370349	chr20:63738996	C/T	Overall health rating	-	Neale B	UKBB	European	2017	0.005689	0.001877	0.002435	+	336020	1	-	Neale-B_UKBB_EUR_2017
rs1056441	rs1056441	chr20:62370349	chr20:63738996	C/T	Height	EFO_0004339	Neale B	UKBB	European	2017	0.005565	0.001837	0.002443	+	336474	1	IVNT	Neale-B_UKBB_EUR_2017
rs1056441	rs1056441	chr20:62370349	chr20:63738996	C/T	Treatment with fybogel mebeverine sachet	EFO_0007056	Neale B	UKBB	European	2017	0.000296	9.77e-05	0.002447	+	337159	1	risk diff	Neale-B_UKBB_EUR_2017
rs1056441	rs1056441	chr20:62370349	chr20:63738996	C/T	Self-reported prostate cancer	EFO_0001663	Neale B	UKBB	European	2017	0.0006664	0.0002202	0.002476	+	337159	1	risk diff	Neale-B_UKBB_EUR_2017
rs1056441	rs1056441	chr20:62370349	chr20:63738996	C/T	HbA1c	EFO_0004541;EFO_0001360	Prins B	28887542	European	2017	0.02	0.01	0.002483	+	9961	1	%	Prins-B_HbA1c_EUR_2017
rs1056441	rs1056441	chr20:62370349	chr20:63738996	C/T	Frequency of stair climbing in last 4 weeks	EFO_0008002	Neale B	UKBB	European	2017	-0.01015	0.003355	0.002495	-	334169	1	-	Neale-B_UKBB_EUR_2017
rs1056441	rs1056441	chr20:62370349	chr20:63738996	C/T	Illnesses of father: chronic bronchitis or emphysema	EFO_0006505;EFO_0000464	Neale B	UKBB	European	2017	0.002583	0.0008554	0.00253	+	294680	1	risk diff	Neale-B_UKBB_EUR_2017
rs1056441	rs1056441	chr20:62370349	chr20:63738996	C/T	Doctor diagnosed asthma	EFO_0000270	Neale B	UKBB	European	2017	0.005204	0.001724	0.002533	+	83529	1	risk diff	Neale-B_UKBB_EUR_2017
rs1056441	rs1056441	chr20:62370349	chr20:63738996	C/T	Arm fat-free mass left	-	Neale B	UKBB	European	2017	0.004936	0.001635	0.002536	+	331159	1	IVNT	Neale-B_UKBB_EUR_2017
rs1056441	rs1056441	chr20:62370349	chr20:63738996	C/T	Monocyte count	EFO_0004586	Astle W	27863252	European	2016	0.01189	0.003941	0.002542	+	173480	2	IVNT	Astle-W_Blood-Cell-Traits_EUR_2016
rs1056441	rs1056441	chr20:62370349	chr20:63738996	C/T	Emphysema or chronic bronchitis	EFO_0000464;EFO_0006505	Neale B	UKBB	European	2017	0.001002	0.0003321	0.002551	+	336782	1	risk diff	Neale-B_UKBB_EUR_2017
rs1056441	rs1056441	chr20:62370349	chr20:63738996	C/T	Height	EFO_0004339	Neale B	UKBB	European	2017	0.005533	0.001837	0.002589	+	336474	1	IVNT	Neale-B_UKBB_EUR_2017
rs1056441	rs1056441	chr20:62370349	chr20:63738996	C/T	Impedance of leg right	-	Neale B	UKBB	European	2017	0.00701	0.002327	0.002589	+	331301	1	IVNT	Neale-B_UKBB_EUR_2017
rs1056441	rs1056441	chr20:62370349	chr20:63738996	C/T	Height	EFO_0004339	GIANT	25282103	European	2014	0.0094	0.0031	0.0026	+	253280	79	Z-score	GIANT_Height_EUR_2014
rs1056441	rs1056441	chr20:62370349	chr20:63738996	C/T	Microalbuminuria	EFO_0004285	CKDGen	21355061	European	2011	NA	NA	0.0026	+	30482	12	log OR	CKDGen_MA_EUR_2011
rs1056441	rs1056441	chr20:62370349	chr20:63738996	C/T	Microalbuminuria	HP_0012594	CKDGen	21355061	European	2011	NA	NA	0.0026	NA	31580	-	-	GRASP
rs1056441	rs1056441	chr20:62370349	chr20:63738996	C/T	Self-reported prostate cancer	EFO_0001663	Neale B	UKBB	European	2017	0.0006629	0.0002202	0.00261	+	337159	1	risk diff	Neale-B_UKBB_EUR_2017
rs1056441	rs1056441	chr20:62370349	chr20:63738996	C/T	Mouth or teeth dental problems: mouth ulcers	-	Neale B	UKBB	European	2017	-0.002373	0.0007882	0.002611	-	336138	1	risk diff	Neale-B_UKBB_EUR_2017
rs1056441	rs1056441	chr20:62370349	chr20:63738996	C/T	Treatment with omeprazole	EFO_0007056	Neale B	UKBB	European	2017	0.001895	0.0006297	0.002612	+	337159	1	risk diff	Neale-B_UKBB_EUR_2017
rs1056441	rs1056441	chr20:62370349	chr20:63738996	C/T	Overall health rating	-	Neale B	UKBB	European	2017	0.005647	0.001877	0.002629	+	336020	1	-	Neale-B_UKBB_EUR_2017
rs1056441	rs1056441	chr20:62370349	chr20:63738996	C/T	Overall health rating	-	Neale B	UKBB	European	2017	0.005646	0.001877	0.00263	+	336020	1	-	Neale-B_UKBB_EUR_2017
rs1056441	rs1056441	chr20:62370349	chr20:63738996	C/T	Overall health rating	-	Neale B	UKBB	European	2017	0.005643	0.001878	0.002658	+	336020	1	-	Neale-B_UKBB_EUR_2017
rs1056441	rs1056441	chr20:62370349	chr20:63738996	C/T	Emphysema or chronic bronchitis	EFO_0000464;EFO_0006505	Neale B	UKBB	European	2017	0.0009959	0.0003318	0.002682	+	336782	1	risk diff	Neale-B_UKBB_EUR_2017
rs1056441	rs1056441	chr20:62370349	chr20:63738996	C/T	Treatment with tramadol	EFO_0007056	Neale B	UKBB	European	2017	0.0008431	0.0002809	0.002685	+	337159	1	risk diff	Neale-B_UKBB_EUR_2017
rs1056441	rs1056441	chr20:62370349	chr20:63738996	C/T	HbA1c	EFO_0004541;EFO_0001360	Prins B	28887542	European	2017	0.02	0.01	0.0027	+	9961	1	%	Prins-B_HbA1c_EUR_2017
rs1056441	rs1056441	chr20:62370349	chr20:63738996	C/T	Mouth or teeth dental problems: mouth ulcers	-	Neale B	UKBB	European	2017	-0.002359	0.0007867	0.002712	-	336138	1	risk diff	Neale-B_UKBB_EUR_2017
rs1056441	rs1056441	chr20:62370349	chr20:63738996	C/T	Eosinophil count	EFO_0004586	Astle W	27863252	European	2016	0.01131	0.003775	0.002722	+	173480	2	IVNT	Astle-W_Blood-Cell-Traits_EUR_2016
rs1056441	rs1056441	chr20:62370349	chr20:63738996	C/T	HbA1c	EFO_0004541;EFO_0001360	Prins B	28887542	European	2017	0.02	0.01	0.00273	+	9961	1	%	Prins-B_HbA1c_EUR_2017
rs1056441	rs1056441	chr20:62370349	chr20:63738996	C/T	Doctor diagnosed asthma	EFO_0000270	Neale B	UKBB	European	2017	0.00516	0.001722	0.002737	+	83529	1	risk diff	Neale-B_UKBB_EUR_2017
rs1056441	rs1056441	chr20:62370349	chr20:63738996	C/T	Self-reported prostate cancer	EFO_0001663	Neale B	UKBB	European	2017	0.0006596	0.0002202	0.002743	+	337159	1	risk diff	Neale-B_UKBB_EUR_2017
rs1056441	rs1056441	chr20:62370349	chr20:63738996	C/T	Mouth or teeth dental problems: mouth ulcers	-	Neale B	UKBB	European	2017	-0.002356	0.0007868	0.002755	-	336138	1	risk diff	Neale-B_UKBB_EUR_2017
rs1056441	rs1056441	chr20:62370349	chr20:63738996	C/T	Height	EFO_0004339	Neale B	UKBB	European	2017	0.005508	0.00184	0.002758	+	336474	1	IVNT	Neale-B_UKBB_EUR_2017
rs1056441	rs1056441	chr20:62370349	chr20:63738996	C/T	Red blood cell count	EFO_0004586	Astle W	27863252	European	2016	0.01137	0.0038	0.002769	+	173480	2	IVNT	Astle-W_Blood-Cell-Traits_EUR_2016
rs1056441	rs1056441	chr20:62370349	chr20:63738996	C/T	Poisoning by nonopioid analgesics, antipyretics and antirheumatics	EFO_0008546	Neale B	UKBB	European	2017	0.0003919	0.000131	0.002775	+	337199	1	risk diff	Neale-B_UKBB_EUR_2017
rs1056441	rs1056441	chr20:62370349	chr20:63738996	C/T	HbA1c	EFO_0004541;EFO_0001360	Prins B	28887542	European	2017	0.02	0.01	0.002777	+	9961	1	%	Prins-B_HbA1c_EUR_2017
rs1056441	rs1056441	chr20:62370349	chr20:63738996	C/T	Overall health rating	-	Neale B	UKBB	European	2017	0.005612	0.001877	0.002788	+	336020	1	-	Neale-B_UKBB_EUR_2017
rs1056441	rs1056441	chr20:62370349	chr20:63738996	C/T	Treatment with zoladex 3.6mg implant	EFO_0007056	Neale B	UKBB	European	2017	0.0001813	6.07e-05	0.002813	+	337159	1	risk diff	Neale-B_UKBB_EUR_2017
rs1056441	rs1056441	chr20:62370349	chr20:63738996	C/T	Treatment with fybogel mebeverine sachet	EFO_0007056	Neale B	UKBB	European	2017	0.0002917	9.77e-05	0.002823	+	337159	1	risk diff	Neale-B_UKBB_EUR_2017
rs1056441	rs1056441	chr20:62370349	chr20:63738996	C/T	Height	EFO_0004339	Neale B	UKBB	European	2017	0.005485	0.001837	0.002825	+	336474	1	IVNT	Neale-B_UKBB_EUR_2017
rs1056441	rs1056441	chr20:62370349	chr20:63738996	C/T	Self-reported spinal cord disorder	EFO_0009488	Neale B	UKBB	European	2017	0.0002409	8.07e-05	0.002826	+	337159	1	risk diff	Neale-B_UKBB_EUR_2017
rs1056441	rs1056441	chr20:62370349	chr20:63738996	C/T	Arm predicted mass left	-	Neale B	UKBB	European	2017	0.004863	0.001629	0.002832	+	331146	1	IVNT	Neale-B_UKBB_EUR_2017
rs1056441	rs1056441	chr20:62370349	chr20:63738996	C/T	Poisoning by nonopioid analgesics, antipyretics and antirheumatics	EFO_0008546	Neale B	UKBB	European	2017	0.0003907	0.000131	0.002854	+	337199	1	risk diff	Neale-B_UKBB_EUR_2017
rs1056441	rs1056441	chr20:62370349	chr20:63738996	C/T	Emphysema or chronic bronchitis	EFO_0000464;EFO_0006505	Neale B	UKBB	European	2017	0.0009889	0.0003317	0.002873	+	336782	1	risk diff	Neale-B_UKBB_EUR_2017
rs1056441	rs1056441	chr20:62370349	chr20:63738996	C/T	Emphysema or chronic bronchitis	EFO_0000464;EFO_0006505	Neale B	UKBB	European	2017	0.0009888	0.0003319	0.002893	+	336782	1	risk diff	Neale-B_UKBB_EUR_2017
rs1056441	rs1056441	chr20:62370349	chr20:63738996	C/T	Leiomyoma of uterus	EFO_0000731	Neale B	UKBB	European	2017	-0.0008683	0.0002916	0.002903	-	337199	1	risk diff	Neale-B_UKBB_EUR_2017
rs1056441	rs1056441	chr20:62370349	chr20:63738996	C/T	Diverticular disease of intestine	EFO_1001460	Neale B	UKBB	European	2017	-0.001084	0.000364	0.00291	-	337199	1	risk diff	Neale-B_UKBB_EUR_2017
rs1056441	rs1056441	chr20:62370349	chr20:63738996	C/T	Arm fat-free mass left	-	Neale B	UKBB	European	2017	0.004862	0.001633	0.002912	+	331159	1	IVNT	Neale-B_UKBB_EUR_2017
rs1056441	rs1056441	chr20:62370349	chr20:63738996	C/T	Height	EFO_0004339	Neale B	UKBB	European	2017	0.005467	0.001837	0.002917	+	336474	1	IVNT	Neale-B_UKBB_EUR_2017
rs1056441	rs1056441	chr20:62370349	chr20:63738996	C/T	Mouth or teeth dental problems: mouth ulcers	-	Neale B	UKBB	European	2017	-0.002343	0.0007872	0.002921	-	336138	1	risk diff	Neale-B_UKBB_EUR_2017
rs1056441	rs1056441	chr20:62370349	chr20:63738996	C/T	Poisoning by nonopioid analgesics, antipyretics and antirheumatics	EFO_0008546	Neale B	UKBB	European	2017	0.0003902	0.0001311	0.002924	+	337199	1	risk diff	Neale-B_UKBB_EUR_2017
rs1056441	rs1056441	chr20:62370349	chr20:63738996	C/T	Rheumatoid arthritis	EFO_0000685	Julia A	18668548	European	2008	NA	NA	0.002938	NA	800	1	log OR	Julia-A_RA_EUR_2008
rs1056441	rs1056441	chr20:62370349	chr20:63738996	C/T	Eosinophil count	EFO_0004586	Astle W	27863252	European	2016	0.01122	0.003774	0.002947	+	173480	2	IVNT	Astle-W_Blood-Cell-Traits_EUR_2016
rs1056441	rs1056441	chr20:62370349	chr20:63738996	C/T	Emphysema or chronic bronchitis	EFO_0000464;EFO_0006505	Neale B	UKBB	European	2017	0.0009802	0.0003297	0.002955	+	336782	1	risk diff	Neale-B_UKBB_EUR_2017
rs1056441	rs1056441	chr20:62370349	chr20:63738996	C/T	Treatment with zoladex 3.6mg implant	EFO_0007056	Neale B	UKBB	European	2017	0.0001804	6.07e-05	0.002958	+	337159	1	risk diff	Neale-B_UKBB_EUR_2017
rs1056441	rs1056441	chr20:62370349	chr20:63738996	C/T	Emphysema or chronic bronchitis	EFO_0000464;EFO_0006505	Neale B	UKBB	European	2017	0.0009859	0.0003317	0.002959	+	336782	1	risk diff	Neale-B_UKBB_EUR_2017
rs1056441	rs1056441	chr20:62370349	chr20:63738996	C/T	Emphysema or chronic bronchitis	EFO_0000464;EFO_0006505	Neale B	UKBB	European	2017	0.0009876	0.0003323	0.002962	+	336782	1	risk diff	Neale-B_UKBB_EUR_2017
rs1056441	rs1056441	chr20:62370349	chr20:63738996	C/T	Low density lipoprotein	EFO_0004611	GLGC	24097068	European	2013	-0.0131	0.0041	0.002966	-	173082	60	IVNT	GLGC_LDL_EUR_2013
rs1056441	rs1056441	chr20:62370349	chr20:63738996	C/T	Eosinophil count	EFO_0004586	Astle W	27863252	European	2016	0.01121	0.003774	0.002968	+	173480	2	IVNT	Astle-W_Blood-Cell-Traits_EUR_2016
rs1056441	rs1056441	chr20:62370349	chr20:63738996	C/T	Lumber spine bone mineral density	EFO_0007701	GEFOS	26367794	European	2015	0.0286	0.009401	0.002971	+	28498	12	Z-score	GEFOS_LSBMD_EUR_2015
rs1056441	rs1056441	chr20:62370349	chr20:63738996	C/T	Diverticular disease of intestine	EFO_1001460	Neale B	UKBB	European	2017	-0.001082	0.0003643	0.002974	-	337199	1	risk diff	Neale-B_UKBB_EUR_2017
rs1056441	rs1056441	chr20:62370349	chr20:63738996	C/T	Emphysema or chronic bronchitis	EFO_0000464;EFO_0006505	Neale B	UKBB	European	2017	0.000985	0.0003317	0.002986	+	336782	1	risk diff	Neale-B_UKBB_EUR_2017
rs1056441	rs1056441	chr20:62370349	chr20:63738996	C/T	Sum eosinophil basophil counts	EFO_0004586	Astle W	27863252	European	2016	0.01122	0.003778	0.002993	+	173480	2	IVNT	Astle-W_Blood-Cell-Traits_EUR_2016
rs1056441	rs1056441	chr20:62370349	chr20:63738996	C/T	Emphysema or chronic bronchitis	EFO_0000464;EFO_0006505	Neale B	UKBB	European	2017	0.0009846	0.0003317	0.002998	+	336782	1	risk diff	Neale-B_UKBB_EUR_2017
rs1056441	rs1056441	chr20:62370349	chr20:63738996	C/T	Mouth or teeth dental problems: mouth ulcers	-	Neale B	UKBB	European	2017	-0.002335	0.0007867	0.003004	-	336138	1	risk diff	Neale-B_UKBB_EUR_2017
rs1056441	rs1056441	chr20:62370349	chr20:63738996	C/T	Diabetes diagnosed by doctor	EFO_0000400	Neale B	UKBB	European	2017	0.001638	0.0005521	0.003011	+	336473	1	risk diff	Neale-B_UKBB_EUR_2017
rs1056441	rs1056441	chr20:62370349	chr20:63738996	C/T	Mouth or teeth dental problems: mouth ulcers	-	Neale B	UKBB	European	2017	-0.002334	0.0007869	0.003015	-	336138	1	risk diff	Neale-B_UKBB_EUR_2017
rs1056441	rs1056441	chr20:62370349	chr20:63738996	C/T	Emphysema or chronic bronchitis	EFO_0000464;EFO_0006505	Neale B	UKBB	European	2017	0.000984	0.0003318	0.003019	+	336782	1	risk diff	Neale-B_UKBB_EUR_2017
rs1056441	rs1056441	chr20:62370349	chr20:63738996	C/T	Treatment with flax oil tablet	EFO_0007056	Neale B	UKBB	European	2017	-0.0003115	0.000105	0.00302	-	337159	1	risk diff	Neale-B_UKBB_EUR_2017
rs1056441	rs1056441	chr20:62370349	chr20:63738996	C/T	Self-reported malabsorption or coeliac disease	EFO_0001060	Neale B	UKBB	European	2017	-0.0005002	0.0001688	0.003042	-	337159	1	risk diff	Neale-B_UKBB_EUR_2017
rs1056441	rs1056441	chr20:62370349	chr20:63738996	C/T	HbA1c	EFO_0004541;EFO_0001360	Prins B	28887542	European	2017	0.02	0.01	0.003077	+	9961	1	%	Prins-B_HbA1c_EUR_2017
rs1056441	rs1056441	chr20:62370349	chr20:63738996	C/T	Treatment with fybogel mebeverine sachet	EFO_0007056	Neale B	UKBB	European	2017	0.0002895	9.78e-05	0.003085	+	337159	1	risk diff	Neale-B_UKBB_EUR_2017
rs1056441	rs1056441	chr20:62370349	chr20:63738996	C/T	Treatment with fybogel mebeverine sachet	EFO_0007056	Neale B	UKBB	European	2017	0.0002891	9.77e-05	0.003088	+	337159	1	risk diff	Neale-B_UKBB_EUR_2017
rs1056441	rs1056441	chr20:62370349	chr20:63738996	C/T	HbA1c	EFO_0004541;EFO_0001360	Prins B	28887542	European	2017	0.02	0.01	0.003095	+	9961	1	%	Prins-B_HbA1c_EUR_2017
rs1056441	rs1056441	chr20:62370349	chr20:63738996	C/T	Mouth or teeth dental problems: mouth ulcers	-	Neale B	UKBB	European	2017	-0.002325	0.0007867	0.003123	-	336138	1	risk diff	Neale-B_UKBB_EUR_2017
rs1056441	rs1056441	chr20:62370349	chr20:63738996	C/T	Impedance of leg right	-	Neale B	UKBB	European	2017	0.006869	0.002325	0.003125	+	331301	1	IVNT	Neale-B_UKBB_EUR_2017
rs1056441	rs1056441	chr20:62370349	chr20:63738996	C/T	Mouth or teeth dental problems: mouth ulcers	-	Neale B	UKBB	European	2017	-0.002325	0.0007868	0.003131	-	336138	1	risk diff	Neale-B_UKBB_EUR_2017
rs1056441	rs1056441	chr20:62370349	chr20:63738996	C/T	Overall health rating	-	Neale B	UKBB	European	2017	0.005546	0.001877	0.003131	+	336020	1	-	Neale-B_UKBB_EUR_2017
rs1056441	rs1056441	chr20:62370349	chr20:63738996	C/T	Emphysema or chronic bronchitis	EFO_0000464;EFO_0006505	Neale B	UKBB	European	2017	0.0009797	0.0003317	0.003142	+	336782	1	risk diff	Neale-B_UKBB_EUR_2017
rs1056441	rs1056441	chr20:62370349	chr20:63738996	C/T	Overall health rating	-	Neale B	UKBB	European	2017	0.005543	0.001877	0.003148	+	336020	1	-	Neale-B_UKBB_EUR_2017
rs1056441	rs1056441	chr20:62370349	chr20:63738996	C/T	Overall health rating	-	Neale B	UKBB	European	2017	0.005542	0.001877	0.003149	+	336020	1	-	Neale-B_UKBB_EUR_2017
rs1056441	rs1056441	chr20:62370349	chr20:63738996	C/T	Self-reported malabsorption or coeliac disease	EFO_0001060	Neale B	UKBB	European	2017	-0.000498	0.0001688	0.003173	-	337159	1	risk diff	Neale-B_UKBB_EUR_2017
rs1056441	rs1056441	chr20:62370349	chr20:63738996	C/T	Mouth or teeth dental problems: mouth ulcers	-	Neale B	UKBB	European	2017	-0.00232	0.0007868	0.003188	-	336138	1	risk diff	Neale-B_UKBB_EUR_2017
rs1056441	rs1056441	chr20:62370349	chr20:63738996	C/T	Leiomyoma of uterus	EFO_0000731	Neale B	UKBB	European	2017	-0.0008584	0.0002911	0.00319	-	337199	1	risk diff	Neale-B_UKBB_EUR_2017
rs1056441	rs1056441	chr20:62370349	chr20:63738996	C/T	Impedance of leg right	-	Neale B	UKBB	European	2017	0.006852	0.002325	0.003201	+	331301	1	IVNT	Neale-B_UKBB_EUR_2017
rs1056441	rs1056441	chr20:62370349	chr20:63738996	C/T	Number of incorrect matches in round	-	Neale B	UKBB	European	2017	-0.007398	0.00251	0.003202	-	336881	1	IVNT	Neale-B_UKBB_EUR_2017
rs1056441	rs1056441	chr20:62370349	chr20:63738996	C/T	Emphysema or chronic bronchitis	EFO_0000464;EFO_0006505	Neale B	UKBB	European	2017	0.0009777	0.0003317	0.003205	+	336782	1	risk diff	Neale-B_UKBB_EUR_2017
rs1056441	rs1056441	chr20:62370349	chr20:63738996	C/T	Diabetes diagnosed by doctor	EFO_0000400	Neale B	UKBB	European	2017	0.001625	0.0005514	0.003208	+	336473	1	risk diff	Neale-B_UKBB_EUR_2017
rs1056441	rs1056441	chr20:62370349	chr20:63738996	C/T	Overall health rating	-	Neale B	UKBB	European	2017	0.00553	0.001877	0.003214	+	336020	1	-	Neale-B_UKBB_EUR_2017
rs1056441	rs1056441	chr20:62370349	chr20:63738996	C/T	Treatment with flax oil tablet	EFO_0007056	Neale B	UKBB	European	2017	-0.0003089	0.0001048	0.003216	-	337159	1	risk diff	Neale-B_UKBB_EUR_2017
rs1056441	rs1056441	chr20:62370349	chr20:63738996	C/T	Treatment with flax oil tablet	EFO_0007056	Neale B	UKBB	European	2017	-0.0003089	0.0001049	0.003218	-	337159	1	risk diff	Neale-B_UKBB_EUR_2017
rs1056441	rs1056441	chr20:62370349	chr20:63738996	C/T	Treatment with flax oil tablet	EFO_0007056	Neale B	UKBB	European	2017	-0.0003089	0.0001048	0.003218	-	337159	1	risk diff	Neale-B_UKBB_EUR_2017
rs1056441	rs1056441	chr20:62370349	chr20:63738996	C/T	Lumber spine bone mineral density	EFO_0007701	GEFOS	26367794	European	2015	0.02841	0.00945	0.003224	+	28498	12	Z-score	GEFOS_LSBMD_EUR_2015
rs1056441	rs1056441	chr20:62370349	chr20:63738996	C/T	Number of incorrect matches in round	-	Neale B	UKBB	European	2017	-0.007394	0.00251	0.003224	-	336881	1	IVNT	Neale-B_UKBB_EUR_2017
rs1056441	rs1056441	chr20:62370349	chr20:63738996	C/T	Diabetes diagnosed by doctor	EFO_0000400	Neale B	UKBB	European	2017	0.001624	0.0005514	0.003227	+	336473	1	risk diff	Neale-B_UKBB_EUR_2017
rs1056441	rs1056441	chr20:62370349	chr20:63738996	C/T	Treatment with flax oil tablet	EFO_0007056	Neale B	UKBB	European	2017	-0.0003087	0.0001048	0.003233	-	337159	1	risk diff	Neale-B_UKBB_EUR_2017
rs1056441	rs1056441	chr20:62370349	chr20:63738996	C/T	Leiomyoma of uterus	EFO_0000731	Neale B	UKBB	European	2017	-0.0008576	0.0002913	0.003235	-	337199	1	risk diff	Neale-B_UKBB_EUR_2017
rs1056441	rs1056441	chr20:62370349	chr20:63738996	C/T	Number of incorrect matches in round	-	Neale B	UKBB	European	2017	-0.007389	0.00251	0.003238	-	336881	1	IVNT	Neale-B_UKBB_EUR_2017
rs1056441	rs1056441	chr20:62370349	chr20:63738996	C/T	Treatment with flax oil tablet	EFO_0007056	Neale B	UKBB	European	2017	-0.0003086	0.0001048	0.003249	-	337159	1	risk diff	Neale-B_UKBB_EUR_2017
rs1056441	rs1056441	chr20:62370349	chr20:63738996	C/T	Diabetes diagnosed by doctor	EFO_0000400	Neale B	UKBB	European	2017	0.001622	0.0005512	0.003251	+	336473	1	risk diff	Neale-B_UKBB_EUR_2017
rs1056441	rs1056441	chr20:62370349	chr20:63738996	C/T	Arm fat-free mass left	-	Neale B	UKBB	European	2017	0.004806	0.001633	0.00326	+	331159	1	IVNT	Neale-B_UKBB_EUR_2017
rs1056441	rs1056441	chr20:62370349	chr20:63738996	C/T	Treatment with flax oil tablet	EFO_0007056	Neale B	UKBB	European	2017	-0.0003082	0.0001048	0.003286	-	337159	1	risk diff	Neale-B_UKBB_EUR_2017
rs1056441	rs1056441	chr20:62370349	chr20:63738996	C/T	Waist circumference adjusted for physical activity	EFO_0007789	GIANT	28448500	European	2017	0.0118	0.004	0.003289	+	168035	55	IVNT	GIANT_Waist-adjusted-PA_EUR_2017
rs1056441	rs1056441	chr20:62370349	chr20:63738996	C/T	Sum eosinophil basophil counts	EFO_0004586	Astle W	27863252	European	2016	0.0111	0.003777	0.00329	+	173480	2	IVNT	Astle-W_Blood-Cell-Traits_EUR_2016
rs1056441	rs1056441	chr20:62370349	chr20:63738996	C/T	Sum eosinophil basophil counts	EFO_0004586	Astle W	27863252	European	2016	0.0111	0.003778	0.003299	+	173480	2	IVNT	Astle-W_Blood-Cell-Traits_EUR_2016
rs1056441	rs1056441	chr20:62370349	chr20:63738996	C/T	Eosinophil count	EFO_0004586	Astle W	27863252	European	2016	0.0111	0.003778	0.003308	+	173480	2	IVNT	Astle-W_Blood-Cell-Traits_EUR_2016
rs1056441	rs1056441	chr20:62370349	chr20:63738996	C/T	Diabetes diagnosed by doctor	EFO_0000400	Neale B	UKBB	European	2017	0.001619	0.0005512	0.003312	+	336473	1	risk diff	Neale-B_UKBB_EUR_2017
rs1056441	rs1056441	chr20:62370349	chr20:63738996	C/T	Treatment with fybogel mebeverine sachet	EFO_0007056	Neale B	UKBB	European	2017	0.0002885	9.83e-05	0.003334	+	337159	1	risk diff	Neale-B_UKBB_EUR_2017
rs1056441	rs1056441	chr20:62370349	chr20:63738996	C/T	Treatment with zoladex 3.6mg implant	EFO_0007056	Neale B	UKBB	European	2017	0.0001794	6.11e-05	0.003338	+	337159	1	risk diff	Neale-B_UKBB_EUR_2017
rs1056441	rs1056441	chr20:62370349	chr20:63738996	C/T	Treatment with flax oil tablet	EFO_0007056	Neale B	UKBB	European	2017	-0.0003072	0.0001049	0.003391	-	337159	1	risk diff	Neale-B_UKBB_EUR_2017
rs1056441	rs1056441	chr20:62370349	chr20:63738996	C/T	Frequency of tiredness or lethargy in last 2 weeks	-	Neale B	UKBB	European	2017	0.006301	0.00215	0.003391	+	327528	1	-	Neale-B_UKBB_EUR_2017
rs1056441	rs1056441	chr20:62370349	chr20:63738996	C/T	Mouth or teeth dental problems: mouth ulcers	-	Neale B	UKBB	European	2017	-0.002305	0.0007867	0.003393	-	336138	1	risk diff	Neale-B_UKBB_EUR_2017
rs1056441	rs1056441	chr20:62370349	chr20:63738996	C/T	Leiomyoma of uterus	EFO_0000731	Neale B	UKBB	European	2017	-0.0008524	0.000291	0.0034	-	337199	1	risk diff	Neale-B_UKBB_EUR_2017
rs1056441	rs1056441	chr20:62370349	chr20:63738996	C/T	Number of incorrect matches in round	-	Neale B	UKBB	European	2017	-0.007345	0.00251	0.003425	-	336881	1	IVNT	Neale-B_UKBB_EUR_2017
rs1056441	rs1056441	chr20:62370349	chr20:63738996	C/T	Eosinophil count	EFO_0004586	Astle W	27863252	European	2016	0.01105	0.003775	0.003426	+	173480	2	IVNT	Astle-W_Blood-Cell-Traits_EUR_2016
rs1056441	rs1056441	chr20:62370349	chr20:63738996	C/T	Insulin-like growth factor 1	EFO_0004627;EFO_0004626	Prins B	28887542	European	2017	1.92	0.65	0.003426	+	9961	1	ng/ml	Prins-B_IGFI1_EUR_2017
rs1056441	rs1056441	chr20:62370349	chr20:63738996	C/T	Treatment with flax oil tablet	EFO_0007056	Neale B	UKBB	European	2017	-0.0003067	0.0001048	0.003438	-	337159	1	risk diff	Neale-B_UKBB_EUR_2017
rs1056441	rs1056441	chr20:62370349	chr20:63738996	C/T	Inflammatory disorders of breast	EFO_1001034	Neale B	UKBB	European	2017	0.0002087	7.14e-05	0.003443	+	337199	1	risk diff	Neale-B_UKBB_EUR_2017
rs1056441	rs1056441	chr20:62370349	chr20:63738996	C/T	Treatment with sertraline	EFO_0007056	Neale B	UKBB	European	2017	-0.0004858	0.0001661	0.003444	-	337159	1	risk diff	Neale-B_UKBB_EUR_2017
rs1056441	rs1056441	chr20:62370349	chr20:63738996	C/T	Frequency of tiredness or lethargy in last 2 weeks	-	Neale B	UKBB	European	2017	0.006338	0.002168	0.003457	+	327528	1	-	Neale-B_UKBB_EUR_2017
rs1056441	rs1056441	chr20:62370349	chr20:63738996	C/T	Self-reported spinal cord disorder	EFO_0009488	Neale B	UKBB	European	2017	0.0002355	8.06e-05	0.003457	+	337159	1	risk diff	Neale-B_UKBB_EUR_2017
rs1056441	rs1056441	chr20:62370349	chr20:63738996	C/T	Diabetes diagnosed by doctor	EFO_0000400	Neale B	UKBB	European	2017	0.001612	0.0005512	0.003457	+	336473	1	risk diff	Neale-B_UKBB_EUR_2017
rs1056441	rs1056441	chr20:62370349	chr20:63738996	C/T	Arm predicted mass left	-	Neale B	UKBB	European	2017	0.004758	0.001627	0.003457	+	331146	1	IVNT	Neale-B_UKBB_EUR_2017
rs1056441	rs1056441	chr20:62370349	chr20:63738996	C/T	Treatment with zoladex 3.6mg implant	EFO_0007056	Neale B	UKBB	European	2017	0.0001785	6.11e-05	0.003469	+	337159	1	risk diff	Neale-B_UKBB_EUR_2017
rs1056441	rs1056441	chr20:62370349	chr20:63738996	C/T	Self-reported spinal cord disorder	EFO_0009488	Neale B	UKBB	European	2017	0.0002355	8.06e-05	0.003469	+	337159	1	risk diff	Neale-B_UKBB_EUR_2017
rs1056441	rs1056441	chr20:62370349	chr20:63738996	C/T	Frequency of stair climbing in last 4 weeks	EFO_0008002	Neale B	UKBB	European	2017	-0.009792	0.003351	0.003471	-	334169	1	-	Neale-B_UKBB_EUR_2017
rs1056441	rs1056441	chr20:62370349	chr20:63738996	C/T	Self-reported spinal cord disorder	EFO_0009488	Neale B	UKBB	European	2017	0.0002354	8.06e-05	0.003472	+	337159	1	risk diff	Neale-B_UKBB_EUR_2017
rs1056441	rs1056441	chr20:62370349	chr20:63738996	C/T	Treatment with flax oil tablet	EFO_0007056	Neale B	UKBB	European	2017	-0.0003065	0.0001049	0.003484	-	337159	1	risk diff	Neale-B_UKBB_EUR_2017
rs1056441	rs1056441	chr20:62370349	chr20:63738996	C/T	Height	EFO_0004339	GIANT	25282103	European	2014	0.0092	0.0031	0.0035	+	253280	79	Z-score	GIANT_Height_EUR_2014
rs1056441	rs1056441	chr20:62370349	chr20:63738996	C/T	Treatment with zoladex 3.6mg implant	EFO_0007056	Neale B	UKBB	European	2017	0.0001784	6.11e-05	0.003502	+	337159	1	risk diff	Neale-B_UKBB_EUR_2017
rs1056441	rs1056441	chr20:62370349	chr20:63738996	C/T	Treatment with zoladex 3.6mg implant	EFO_0007056	Neale B	UKBB	European	2017	0.0001783	6.11e-05	0.003503	+	337159	1	risk diff	Neale-B_UKBB_EUR_2017
rs1056441	rs1056441	chr20:62370349	chr20:63738996	C/T	Treatment with zoladex 3.6mg implant	EFO_0007056	Neale B	UKBB	European	2017	0.0001783	6.11e-05	0.003521	+	337159	1	risk diff	Neale-B_UKBB_EUR_2017
rs1056441	rs1056441	chr20:62370349	chr20:63738996	C/T	Treatment with zoladex 3.6mg implant	EFO_0007056	Neale B	UKBB	European	2017	0.0001782	6.11e-05	0.003523	+	337159	1	risk diff	Neale-B_UKBB_EUR_2017
rs1056441	rs1056441	chr20:62370349	chr20:63738996	C/T	Number of incorrect matches in round	-	Neale B	UKBB	European	2017	-0.007324	0.00251	0.003527	-	336881	1	IVNT	Neale-B_UKBB_EUR_2017
rs1056441	rs1056441	chr20:62370349	chr20:63738996	C/T	Diverticular disease of intestine	EFO_1001460	Neale B	UKBB	European	2017	-0.001062	0.000364	0.003537	-	337199	1	risk diff	Neale-B_UKBB_EUR_2017
rs1056441	rs1056441	chr20:62370349	chr20:63738996	C/T	Paroxysmal tachycardia	EFO_0005306	Neale B	UKBB	European	2017	0.0004388	0.0001505	0.00354	+	337199	1	risk diff	Neale-B_UKBB_EUR_2017
rs1056441	rs1056441	chr20:62370349	chr20:63738996	C/T	Self-reported spinal cord disorder	EFO_0009488	Neale B	UKBB	European	2017	0.0002362	8.1e-05	0.003544	+	337159	1	risk diff	Neale-B_UKBB_EUR_2017
rs1056441	rs1056441	chr20:62370349	chr20:63738996	C/T	Treatment with zoladex 3.6mg implant	EFO_0007056	Neale B	UKBB	European	2017	0.000178	6.11e-05	0.003552	+	337159	1	risk diff	Neale-B_UKBB_EUR_2017
rs1056441	rs1056441	chr20:62370349	chr20:63738996	C/T	Treatment with zoladex 3.6mg implant	EFO_0007056	Neale B	UKBB	European	2017	0.000178	6.11e-05	0.003554	+	337159	1	risk diff	Neale-B_UKBB_EUR_2017
rs1056441	rs1056441	chr20:62370349	chr20:63738996	C/T	Treatment with zoladex 3.6mg implant	EFO_0007056	Neale B	UKBB	European	2017	0.000178	6.11e-05	0.003558	+	337159	1	risk diff	Neale-B_UKBB_EUR_2017
rs1056441	rs1056441	chr20:62370349	chr20:63738996	C/T	Emphysema or chronic bronchitis	EFO_0000464;EFO_0006505	Neale B	UKBB	European	2017	0.0009618	0.00033	0.003565	+	336782	1	risk diff	Neale-B_UKBB_EUR_2017
rs1056441	rs1056441	chr20:62370349	chr20:63738996	C/T	Treatment with zoladex 3.6mg implant	EFO_0007056	Neale B	UKBB	European	2017	0.0001779	6.11e-05	0.003568	+	337159	1	risk diff	Neale-B_UKBB_EUR_2017
rs1056441	rs1056441	chr20:62370349	chr20:63738996	C/T	Basal metabolic rate	EFO_0007777	Neale B	UKBB	European	2017	0.004966	0.001705	0.003582	+	331307	1	IVNT	Neale-B_UKBB_EUR_2017
rs1056441	rs1056441	chr20:62370349	chr20:63738996	C/T	B:%Mature; Mature B	OBA_VT1000783	Roederer M	25772697	European	2015	0.065	0.02232	0.003592	+	456	1	-	Roederer-M_Immune-System_EUR_2015
rs1056441	rs1056441	chr20:62370349	chr20:63738996	C/T	Inflammatory disorders of breast	EFO_1001034	Neale B	UKBB	European	2017	0.0002077	7.13e-05	0.003596	+	337199	1	risk diff	Neale-B_UKBB_EUR_2017
rs1056441	rs1056441	chr20:62370349	chr20:63738996	C/T	Treatment with fybogel mebeverine sachet	EFO_0007056	Neale B	UKBB	European	2017	0.0002857	9.82e-05	0.003617	+	337159	1	risk diff	Neale-B_UKBB_EUR_2017
rs1056441	rs1056441	chr20:62370349	chr20:63738996	C/T	Inflammatory disorders of breast	EFO_1001034	Neale B	UKBB	European	2017	0.0002074	7.13e-05	0.003618	+	337199	1	risk diff	Neale-B_UKBB_EUR_2017
rs1056441	rs1056441	chr20:62370349	chr20:63738996	C/T	Treatment with zoladex 3.6mg implant	EFO_0007056	Neale B	UKBB	European	2017	0.0001777	6.11e-05	0.003621	+	337159	1	risk diff	Neale-B_UKBB_EUR_2017
rs1056441	rs1056441	chr20:62370349	chr20:63738996	C/T	Number of incorrect matches in round	-	Neale B	UKBB	European	2017	-0.007304	0.00251	0.003621	-	336881	1	IVNT	Neale-B_UKBB_EUR_2017
rs1056441	rs1056441	chr20:62370349	chr20:63738996	C/T	Self-reported spinal cord disorder	EFO_0009488	Neale B	UKBB	European	2017	0.0002344	8.06e-05	0.003626	+	337159	1	risk diff	Neale-B_UKBB_EUR_2017
rs1056441	rs1056441	chr20:62370349	chr20:63738996	C/T	Inflammatory disorders of breast	EFO_1001034	Neale B	UKBB	European	2017	0.0002073	7.13e-05	0.003628	+	337199	1	risk diff	Neale-B_UKBB_EUR_2017
rs1056441	rs1056441	chr20:62370349	chr20:63738996	C/T	Treatment with zoladex 3.6mg implant	EFO_0007056	Neale B	UKBB	European	2017	0.0001767	6.08e-05	0.003637	+	337159	1	risk diff	Neale-B_UKBB_EUR_2017
rs1056441	rs1056441	chr20:62370349	chr20:63738996	C/T	Treatment with omeprazole	EFO_0007056	Neale B	UKBB	European	2017	0.001756	0.000604	0.00364	+	337159	1	risk diff	Neale-B_UKBB_EUR_2017
rs1056441	rs1056441	chr20:62370349	chr20:63738996	C/T	Self-reported spinal cord disorder	EFO_0009488	Neale B	UKBB	European	2017	0.0002355	8.1e-05	0.003643	+	337159	1	risk diff	Neale-B_UKBB_EUR_2017
rs1056441	rs1056441	chr20:62370349	chr20:63738996	C/T	Home area population density: Scotland large urban area	-	Neale B	UKBB	European	2017	-0.00162	0.0005575	0.003656	-	333997	1	risk diff	Neale-B_UKBB_EUR_2017
rs1056441	rs1056441	chr20:62370349	chr20:63738996	C/T	Number of incorrect matches in round	-	Neale B	UKBB	European	2017	-0.007287	0.002508	0.003669	-	336881	1	IVNT	Neale-B_UKBB_EUR_2017
rs1056441	rs1056441	chr20:62370349	chr20:63738996	C/T	Inflammatory disorders of breast	EFO_1001034	Neale B	UKBB	European	2017	0.000207	7.13e-05	0.003674	+	337199	1	risk diff	Neale-B_UKBB_EUR_2017
rs1056441	rs1056441	chr20:62370349	chr20:63738996	C/T	Sum eosinophil basophil counts	EFO_0004586	Astle W	27863252	European	2016	0.01098	0.003781	0.003675	+	173480	2	IVNT	Astle-W_Blood-Cell-Traits_EUR_2016
rs1056441	rs1056441	chr20:62370349	chr20:63738996	C/T	Frequency of tiredness or lethargy in last 2 weeks	-	Neale B	UKBB	European	2017	0.006247	0.00215	0.003675	+	327528	1	-	Neale-B_UKBB_EUR_2017
rs1056441	rs1056441	chr20:62370349	chr20:63738996	C/T	Treatment with zoladex 3.6mg implant	EFO_0007056	Neale B	UKBB	European	2017	0.0001777	6.12e-05	0.00368	+	337159	1	risk diff	Neale-B_UKBB_EUR_2017
rs1056441	rs1056441	chr20:62370349	chr20:63738996	C/T	Sum eosinophil basophil counts	EFO_0004586	Astle W	27863252	European	2016	0.01097	0.003778	0.003682	+	173480	2	IVNT	Astle-W_Blood-Cell-Traits_EUR_2016
rs1056441	rs1056441	chr20:62370349	chr20:63738996	C/T	Self-reported spinal cord disorder	EFO_0009488	Neale B	UKBB	European	2017	0.0002339	8.06e-05	0.00369	+	337159	1	risk diff	Neale-B_UKBB_EUR_2017
rs1056441	rs1056441	chr20:62370349	chr20:63738996	C/T	Inflammatory disorders of breast	EFO_1001034	Neale B	UKBB	European	2017	0.0002069	7.13e-05	0.003693	+	337199	1	risk diff	Neale-B_UKBB_EUR_2017
rs1056441	rs1056441	chr20:62370349	chr20:63738996	C/T	Inflammatory disorders of breast	EFO_1001034	Neale B	UKBB	European	2017	0.0002069	7.13e-05	0.003695	+	337199	1	risk diff	Neale-B_UKBB_EUR_2017
rs1056441	rs1056441	chr20:62370349	chr20:63738996	C/T	Arm predicted mass left	-	Neale B	UKBB	European	2017	0.004724	0.001627	0.003695	+	331146	1	IVNT	Neale-B_UKBB_EUR_2017
rs1056441	rs1056441	chr20:62370349	chr20:63738996	C/T	Height	EFO_0004339	GIANT	25282103	European	2014	0.0091	0.0031	0.0037	+	253280	79	Z-score	GIANT_Height_EUR_2014
rs1056441	rs1056441	chr20:62370349	chr20:63738996	C/T	Self-reported spinal cord disorder	EFO_0009488	Neale B	UKBB	European	2017	0.0002351	8.1e-05	0.003702	+	337159	1	risk diff	Neale-B_UKBB_EUR_2017
rs1056441	rs1056441	chr20:62370349	chr20:63738996	C/T	Inflammatory disorders of breast	EFO_1001034	Neale B	UKBB	European	2017	0.0002069	7.13e-05	0.003702	+	337199	1	risk diff	Neale-B_UKBB_EUR_2017
rs1056441	rs1056441	chr20:62370349	chr20:63738996	C/T	Treatment with fybogel mebeverine sachet	EFO_0007056	Neale B	UKBB	European	2017	0.0002851	9.83e-05	0.003716	+	337159	1	risk diff	Neale-B_UKBB_EUR_2017
rs1056441	rs1056441	chr20:62370349	chr20:63738996	C/T	Self-reported spinal cord disorder	EFO_0009488	Neale B	UKBB	European	2017	0.0002349	8.1e-05	0.003721	+	337159	1	risk diff	Neale-B_UKBB_EUR_2017
rs1056441	rs1056441	chr20:62370349	chr20:63738996	C/T	Eosinophil count	EFO_0004586	Astle W	27863252	European	2016	0.01096	0.003778	0.003722	+	173480	2	IVNT	Astle-W_Blood-Cell-Traits_EUR_2016
rs1056441	rs1056441	chr20:62370349	chr20:63738996	C/T	Treatment with fybogel mebeverine sachet	EFO_0007056	Neale B	UKBB	European	2017	0.0002831	9.76e-05	0.003728	+	337159	1	risk diff	Neale-B_UKBB_EUR_2017
rs1056441	rs1056441	chr20:62370349	chr20:63738996	C/T	Self-reported spinal cord disorder	EFO_0009488	Neale B	UKBB	European	2017	0.0002349	8.1e-05	0.003733	+	337159	1	risk diff	Neale-B_UKBB_EUR_2017
rs1056441	rs1056441	chr20:62370349	chr20:63738996	C/T	Self-reported spinal cord disorder	EFO_0009488	Neale B	UKBB	European	2017	0.0002349	8.1e-05	0.003733	+	337159	1	risk diff	Neale-B_UKBB_EUR_2017
rs1056441	rs1056441	chr20:62370349	chr20:63738996	C/T	Treatment with fybogel mebeverine sachet	EFO_0007056	Neale B	UKBB	European	2017	0.0002847	9.82e-05	0.003739	+	337159	1	risk diff	Neale-B_UKBB_EUR_2017
rs1056441	rs1056441	chr20:62370349	chr20:63738996	C/T	Inflammatory disorders of breast	EFO_1001034	Neale B	UKBB	European	2017	0.0002066	7.13e-05	0.003746	+	337199	1	risk diff	Neale-B_UKBB_EUR_2017
rs1056441	rs1056441	chr20:62370349	chr20:63738996	C/T	Treatment with fybogel mebeverine sachet	EFO_0007056	Neale B	UKBB	European	2017	0.0002846	9.82e-05	0.003755	+	337159	1	risk diff	Neale-B_UKBB_EUR_2017
rs1056441	rs1056441	chr20:62370349	chr20:63738996	C/T	Inflammatory disorders of breast	EFO_1001034	Neale B	UKBB	European	2017	0.0002067	7.13e-05	0.003758	+	337199	1	risk diff	Neale-B_UKBB_EUR_2017
rs1056441	rs1056441	chr20:62370349	chr20:63738996	C/T	Treatment with fybogel mebeverine sachet	EFO_0007056	Neale B	UKBB	European	2017	0.0002845	9.82e-05	0.00376	+	337159	1	risk diff	Neale-B_UKBB_EUR_2017
rs1056441	rs1056441	chr20:62370349	chr20:63738996	C/T	Standardized difference in height between age 14 years and adult	-	EGGC	23449627	European	2013	0.01013	0.0243	0.003772	+	4282	5	SDS	EGGC_Puberty-Growth-PTF-PTM_EUR_2013
rs1056441	rs1056441	chr20:62370349	chr20:63738996	C/T	Treatment with fybogel mebeverine sachet	EFO_0007056	Neale B	UKBB	European	2017	0.0002844	9.82e-05	0.003774	+	337159	1	risk diff	Neale-B_UKBB_EUR_2017
rs1056441	rs1056441	chr20:62370349	chr20:63738996	C/T	Self-reported spinal cord disorder	EFO_0009488	Neale B	UKBB	European	2017	0.0002347	8.1e-05	0.003775	+	337159	1	risk diff	Neale-B_UKBB_EUR_2017
rs1056441	rs1056441	chr20:62370349	chr20:63738996	C/T	Leiomyoma of uterus	EFO_0000731	Neale B	UKBB	European	2017	-0.000843	0.0002911	0.003777	-	337199	1	risk diff	Neale-B_UKBB_EUR_2017
rs1056441	rs1056441	chr20:62370349	chr20:63738996	C/T	Height	EFO_0004339	GIANT	25282103	European	2014	0.0092	0.0032	0.0038	+	253280	79	Z-score	GIANT_Height_EUR_2014
rs1056441	rs1056441	chr20:62370349	chr20:63738996	C/T	Self-reported malabsorption or coeliac disease	EFO_0001060	Neale B	UKBB	European	2017	-0.0004889	0.0001689	0.003808	-	337159	1	risk diff	Neale-B_UKBB_EUR_2017
rs1056441	rs1056441	chr20:62370349	chr20:63738996	C/T	Treatment with ventolin 100micrograms inhaler	EFO_0007056	Neale B	UKBB	European	2017	0.001248	0.0004312	0.003812	+	337159	1	risk diff	Neale-B_UKBB_EUR_2017
rs1056441	rs1056441	chr20:62370349	chr20:63738996	C/T	B:%Mature; Mature B	OBA_VT1000783	Roederer M	25772697	European	2015	0.0626	0.02164	0.003815	+	456	1	-	Roederer-M_Immune-System_EUR_2015
rs1056441	rs1056441	chr20:62370349	chr20:63738996	C/T	B:%Mature; Mature B	OBA_VT1000783	Roederer M	25772697	European	2015	0.0626	0.02164	0.003815	+	456	1	-	Roederer-M_Immune-System_EUR_2015
rs1056441	rs1056441	chr20:62370349	chr20:63738996	C/T	B:%Mature; Mature B	OBA_VT1000783	Roederer M	25772697	European	2015	0.0626	0.02164	0.003815	+	456	1	-	Roederer-M_Immune-System_EUR_2015
rs1056441	rs1056441	chr20:62370349	chr20:63738996	C/T	Frequency of tiredness or lethargy in last 2 weeks	-	Neale B	UKBB	European	2017	0.006226	0.002152	0.003819	+	327528	1	-	Neale-B_UKBB_EUR_2017
rs1056441	rs1056441	chr20:62370349	chr20:63738996	C/T	Home area population density: Scotland large urban area	-	Neale B	UKBB	European	2017	-0.001613	0.0005576	0.00382	-	333997	1	risk diff	Neale-B_UKBB_EUR_2017
rs1056441	rs1056441	chr20:62370349	chr20:63738996	C/T	Treatment with fybogel mebeverine sachet	EFO_0007056	Neale B	UKBB	European	2017	0.000284	9.82e-05	0.003827	+	337159	1	risk diff	Neale-B_UKBB_EUR_2017
rs1056441	rs1056441	chr20:62370349	chr20:63738996	C/T	Doctor diagnosed asthma	EFO_0000270	Neale B	UKBB	European	2017	0.004991	0.001726	0.003832	+	83529	1	risk diff	Neale-B_UKBB_EUR_2017
rs1056441	rs1056441	chr20:62370349	chr20:63738996	C/T	HbA1c	EFO_0004541;EFO_0001360	Prins B	28887542	European	2017	0.02	0.01	0.003842	+	9961	1	%	Prins-B_HbA1c_EUR_2017
rs1056441	rs1056441	chr20:62370349	chr20:63738996	C/T	Treatment with fybogel mebeverine sachet	EFO_0007056	Neale B	UKBB	European	2017	0.0002839	9.82e-05	0.003844	+	337159	1	risk diff	Neale-B_UKBB_EUR_2017
rs1056441	rs1056441	chr20:62370349	chr20:63738996	C/T	Self-reported spinal cord disorder	EFO_0009488	Neale B	UKBB	European	2017	0.0002341	8.1e-05	0.003849	+	337159	1	risk diff	Neale-B_UKBB_EUR_2017
rs1056441	rs1056441	chr20:62370349	chr20:63738996	C/T	Basal metabolic rate	EFO_0007777	Neale B	UKBB	European	2017	0.004928	0.001705	0.003853	+	331307	1	IVNT	Neale-B_UKBB_EUR_2017
rs1056441	rs1056441	chr20:62370349	chr20:63738996	C/T	Inflammatory disorders of breast	EFO_1001034	Neale B	UKBB	European	2017	0.0002063	7.14e-05	0.00386	+	337199	1	risk diff	Neale-B_UKBB_EUR_2017
rs1056441	rs1056441	chr20:62370349	chr20:63738996	C/T	Overall health rating	-	Neale B	UKBB	European	2017	0.005392	0.001867	0.003881	+	336020	1	-	Neale-B_UKBB_EUR_2017
rs1056441	rs1056441	chr20:62370349	chr20:63738996	C/T	Treatment with trifluoperazine	EFO_0007056	Neale B	UKBB	European	2017	-0.0001034	3.58e-05	0.003883	-	337159	1	risk diff	Neale-B_UKBB_EUR_2017
rs1056441	rs1056441	chr20:62370349	chr20:63738996	C/T	Treatment with ventolin 100micrograms inhaler	EFO_0007056	Neale B	UKBB	European	2017	0.001245	0.0004312	0.00389	+	337159	1	risk diff	Neale-B_UKBB_EUR_2017
rs1056441	rs1056441	chr20:62370349	chr20:63738996	C/T	Overall health rating	-	Neale B	UKBB	European	2017	0.005389	0.001867	0.003891	+	336020	1	-	Neale-B_UKBB_EUR_2017
rs1056441	rs1056441	chr20:62370349	chr20:63738996	C/T	Mouth or teeth dental problems: dentures	-	Neale B	UKBB	European	2017	0.002789	0.0009665	0.003905	+	336138	1	risk diff	Neale-B_UKBB_EUR_2017
rs1056441	rs1056441	chr20:62370349	chr20:63738996	C/T	Sum eosinophil basophil counts	EFO_0004586	Astle W	27863252	European	2016	0.01091	0.003781	0.003908	+	173480	2	IVNT	Astle-W_Blood-Cell-Traits_EUR_2016
rs1056441	rs1056441	chr20:62370349	chr20:63738996	C/T	Treatment with fybogel mebeverine sachet	EFO_0007056	Neale B	UKBB	European	2017	0.0002837	9.84e-05	0.003935	+	337159	1	risk diff	Neale-B_UKBB_EUR_2017
rs1056441	rs1056441	chr20:62370349	chr20:63738996	C/T	Mouth or teeth dental problems: dentures	-	Neale B	UKBB	European	2017	0.002787	0.0009664	0.003936	+	336138	1	risk diff	Neale-B_UKBB_EUR_2017
rs1056441	rs1056441	chr20:62370349	chr20:63738996	C/T	Self-reported spinal cord disorder	EFO_0009488	Neale B	UKBB	European	2017	0.0002322	8.06e-05	0.003949	+	337159	1	risk diff	Neale-B_UKBB_EUR_2017
rs1056441	rs1056441	chr20:62370349	chr20:63738996	C/T	Leiomyoma of uterus	EFO_0000731	Neale B	UKBB	European	2017	-0.0008396	0.0002913	0.003951	-	337199	1	risk diff	Neale-B_UKBB_EUR_2017
rs1056441	rs1056441	chr20:62370349	chr20:63738996	C/T	Usual walking pace	EFO_0008002	Neale B	UKBB	European	2017	-0.004712	0.001637	0.003983	-	335349	1	-	Neale-B_UKBB_EUR_2017
rs1056441	rs1056441	chr20:62370349	chr20:63738996	C/T	Treatment with sertraline	EFO_0007056	Neale B	UKBB	European	2017	-0.000481	0.0001671	0.003995	-	337159	1	risk diff	Neale-B_UKBB_EUR_2017
rs1056441	rs1056441	chr20:62370349	chr20:63738996	C/T	Basal metabolic rate	EFO_0007777	Neale B	UKBB	European	2017	0.004905	0.001705	0.004011	+	331307	1	IVNT	Neale-B_UKBB_EUR_2017
rs1056441	rs1056441	chr20:62370349	chr20:63738996	C/T	Overall health rating	-	Neale B	UKBB	European	2017	0.005369	0.001867	0.004033	+	336020	1	-	Neale-B_UKBB_EUR_2017
rs1056441	rs1056441	chr20:62370349	chr20:63738996	C/T	Pack years adult smoking as proportion of life span exposed to smoking	EFO_0004318	Neale B	UKBB	European	2017	0.01348	0.004687	0.004036	+	101726	1	IVNT	Neale-B_UKBB_EUR_2017
rs1056441	rs1056441	chr20:62370349	chr20:63738996	C/T	Overall health rating	-	Neale B	UKBB	European	2017	0.005368	0.001867	0.004041	+	336020	1	-	Neale-B_UKBB_EUR_2017
rs1056441	rs1056441	chr20:62370349	chr20:63738996	C/T	Treatment with flax oil tablet	EFO_0007056	Neale B	UKBB	European	2017	-0.0003016	0.0001049	0.004046	-	337159	1	risk diff	Neale-B_UKBB_EUR_2017
rs1056441	rs1056441	chr20:62370349	chr20:63738996	C/T	Paroxysmal tachycardia	EFO_0005306	Neale B	UKBB	European	2017	0.0004318	0.0001502	0.004049	+	337199	1	risk diff	Neale-B_UKBB_EUR_2017
rs1056441	rs1056441	chr20:62370349	chr20:63738996	C/T	Treatment with trifluoperazine	EFO_0007056	Neale B	UKBB	European	2017	-0.0001029	3.58e-05	0.004056	-	337159	1	risk diff	Neale-B_UKBB_EUR_2017
rs1056441	rs1056441	chr20:62370349	chr20:63738996	C/T	Basal metabolic rate	EFO_0007777	Neale B	UKBB	European	2017	0.004899	0.001705	0.00406	+	331307	1	IVNT	Neale-B_UKBB_EUR_2017
rs1056441	rs1056441	chr20:62370349	chr20:63738996	C/T	Insulin-like growth factor 1	EFO_0004627;EFO_0004626	Prins B	28887542	European	2017	1.89	0.66	0.004082	+	9961	1	ng/ml	Prins-B_IGFI1_EUR_2017
rs1056441	rs1056441	chr20:62370349	chr20:63738996	C/T	Self-reported uterine or endometrial cancer	EFO_0007532;EFO_1001512	Neale B	UKBB	European	2017	0.0003693	0.0001286	0.004085	+	337159	1	risk diff	Neale-B_UKBB_EUR_2017
rs1056441	rs1056441	chr20:62370349	chr20:63738996	C/T	Self-reported peripheral nerve injury	EFO_0009510	Neale B	UKBB	European	2017	0.0001819	6.34e-05	0.004095	+	337159	1	risk diff	Neale-B_UKBB_EUR_2017
rs1056441	rs1056441	chr20:62370349	chr20:63738996	C/T	Paroxysmal tachycardia	EFO_0005306	Neale B	UKBB	European	2017	0.0004311	0.0001502	0.004104	+	337199	1	risk diff	Neale-B_UKBB_EUR_2017
rs1056441	rs1056441	chr20:62370349	chr20:63738996	C/T	Overall health rating	-	Neale B	UKBB	European	2017	0.005367	0.00187	0.004108	+	336020	1	-	Neale-B_UKBB_EUR_2017
rs1056441	rs1056441	chr20:62370349	chr20:63738996	C/T	HbA1c	EFO_0004541;EFO_0001360	Prins B	28887542	European	2017	0.02	0.01	0.004114	+	9961	1	%	Prins-B_HbA1c_EUR_2017
rs1056441	rs1056441	chr20:62370349	chr20:63738996	C/T	Leiomyoma of uterus	EFO_0000731	Neale B	UKBB	European	2017	-0.0008349	0.000291	0.004122	-	337199	1	risk diff	Neale-B_UKBB_EUR_2017
rs1056441	rs1056441	chr20:62370349	chr20:63738996	C/T	Treatment with omeprazole	EFO_0007056	Neale B	UKBB	European	2017	0.001733	0.000604	0.004122	+	337159	1	risk diff	Neale-B_UKBB_EUR_2017
rs1056441	rs1056441	chr20:62370349	chr20:63738996	C/T	Paroxysmal tachycardia	EFO_0005306	Neale B	UKBB	European	2017	0.0004308	0.0001502	0.004132	+	337199	1	risk diff	Neale-B_UKBB_EUR_2017
rs1056441	rs1056441	chr20:62370349	chr20:63738996	C/T	Treatment with flax oil tablet	EFO_0007056	Neale B	UKBB	European	2017	-0.0003009	0.0001049	0.004139	-	337159	1	risk diff	Neale-B_UKBB_EUR_2017
rs1056441	rs1056441	chr20:62370349	chr20:63738996	C/T	Paroxysmal tachycardia	EFO_0005306	Neale B	UKBB	European	2017	0.0004307	0.0001502	0.004142	+	337199	1	risk diff	Neale-B_UKBB_EUR_2017
[truncated: 4,996 more rows]
